# Supplementary material for: Increasing the Livability of Open Public Spaces during Nighttime: The Importance of Lighting in Waterfront Areas
Source: MDPI journal article supplement (doi:10.3390/su14106058), 2022-05-17
Supplement: s1 [file s1]

## The questionnaire No: 1

Are you conducting a survey and or interview?

1. Yes
2. No

Answer: Yes

You have been asked to complete this survey as part of scientific research "*Increasing the livability of open public space during nighttime: the importance of lightning in the waterfront areas*". The study is designed to determine the usage dynamics of the waterfront area. Your responses are entirely voluntary, and you may refuse to complete any part or all of this survey. This survey is designed to be anonymous, meaning that there should be no way to connect your responses with you. Toward that end, please do not sign your name to the survey, or include any information in your responses that makes it easy to identify you. By completing and submitting the survey, you affirm that you are at least 18 years old and that you give your consent to use your answers in this research.

*General information:*

Age:

1. 18-25;
2. 25-40;
3. 40-55;
4. 55+

Answer: 25-40

Gender

1. Female
2. Male

Answer: Female

*PART A: Open space usage:*

**1. Do you use open public space in the waterfront area?**

1. Yes
2. No

Answer: No

**2. Time period: When do you use these spaces the most?**

1. in the morning
2. in the afternoon
3. in the evening/during nighttime
4. other: in the morning and in the evening

Answer: 3) in the evening/during nighttime

The questionnaire No: 1

*PART B: Nighttime open space usage:*

**3. Frequency: How often do you visit these spaces during nighttime?**

1. very often - every day
2. often - once or twice per week
3. rarely - one or twice per month
4. almost never

Answer: 2) often - once or twice per week

**4. Duration: How much time do you usually spend in these places during nighttime?**

1. more than 1 hour
2. around 30 minutes
3. 10-15 minutes
4. couple of minutes

Answer: 3) 10-15 minutes

**5. Activity: What type of activities do you engage in these spaces during nighttime?**

1. leisure and socialization- hanging out with friends or walking the dog
2. recreation - walking, running, cycling, exercise
3. relaxing by myself
4. just passing through
5. Other / walking the dog

Answer: 1) leisure and socialization- hangingt out with friends or walking the dog

**6. When spending time in open space during nighttime what is the most important spatial feature that influence the position and means of usage?**

1. urban furniture and pedestrian/bicycle paths
2. greenery and water proximity
3. Lightning
4. Other: \_\_\_\_\_

Answer: 2) greenery and water proximity

**7. Are you satisfied with the position and overall quality of artificial lightning in these spaces?**

(Choose grade from 1 to 5; 1-not at all, 5-very satisfied)

Answer: 3

**8. Do you feel comfortable and safe in these spaces during nighttime?**

1. Yes
2. No

Answer: No

## The questionnaire No: 2

Are you conducting a survey and or interview?

1. Yes
2. No

Answer: Yes

You have been asked to complete this survey as part of scientific research "*Increasing the livability of open public space during nighttime: the importance of lightning in the waterfront areas*". The study is designed to determine the usage dynamics of the waterfront area. Your responses are entirely voluntary, and you may refuse to complete any part or all of this survey. This survey is designed to be anonymous, meaning that there should be no way to connect your responses with you. Toward that end, please do not sign your name to the survey, or include any information in your responses that makes it easy to identify you. By completing and submitting the survey, you affirm that you are at least 18 years old and that you give your consent to use your answers in this research.

*General information:*

Age:

1. 18-25;
2. 25-40;
3. 40-55;
4. 55+

Answer: 25-40

Gender

1. Female
2. Male

Answer: Male

*PART A: Open space usage:*

**1. Do you use open public space in the waterfront area?**

1. Yes
2. No

Answer: Yes

**2. Time period: When do you use these spaces the most?**

1. in the morning
2. in the afternoon
3. in the evening/during nighttime
4. other: in the morning and in the evening

Answer: 1) in the morning

## The questionnaire No: 2

### *PART B: Nighttime open space usage:*

#### **3. Frequency: How often do you visit these spaces during nighttime?**

1. very often - every day
2. often - once or twice per week
3. rarely - one or twice per month
4. almost never

Answer: 2) often - once or twice per week

#### **4. Duration: How much time do you usually spend in these places during nighttime?**

1. more than 1 hour
2. around 30 minutes
3. 10-15 minutes
4. couple of minutes

Answer: 3) 10-15 minutes

#### **5. Activity: What type of activities do you engage in these spaces during nighttime?**

1. leisure and socialization- hanging out with friends or walking the dog
2. recreation - walking, running, cycling, exercise
3. relaxing by myself
4. just passing through
5. Other / walking the dog

Answer: 3) relaxing by myself

#### **6. When spending time in open space during nighttime what is the most important spatial feature that influence the position and means of usage?**

1. urban furniture and pedestrian/bicycle paths
2. greenery and water proximity
3. Lightning
4. Other: \_\_\_\_\_

Answer: Other: monuments

#### **7. Are you satisfied with the position and overall quality of artificial lightning in these spaces?** (Choose grade from 1 to 5; 1-not at all, 5-very satisfied)

Answer: 3

#### **8. Do you feel comfortable and safe in these spaces during nighttime?**

1. Yes
2. No

Answer: Yes

### The questionnaire No: 3

Are you conducting a survey and or interview?

1. Yes
2. No

Answer: Yes

You have been asked to complete this survey as part of scientific research "*Increasing the livability of open public space during nighttime: the importance of lightning in the waterfront areas*". The study is designed to determine the usage dynamics of the waterfront area. Your responses are entirely voluntary, and you may refuse to complete any part or all of this survey. This survey is designed to be anonymous, meaning that there should be no way to connect your responses with you. Toward that end, please do not sign your name to the survey, or include any information in your responses that makes it easy to identify you. By completing and submitting the survey, you affirm that you are at least 18 years old and that you give your consent to use your answers in this research.

*General information:*

Age:

1. 18-25;
2. 25-40;
3. 40-55;
4. 55+

Answer: 40-55

Gender

1. Female
2. Male

Answer: Female

*PART A: Open space usage:*

**1. Do you use open public space in the waterfront area?**

1. Yes
2. No

Answer: Yes

**2. Time period: When do you use these spaces the most?**

1. in the morning
2. in the afternoon
3. in the evening/during nighttime
4. other: in the morning and in the evening

Answer: 4) other: in the morning and in the evening

### The questionnaire No: 3

#### *PART B: Nighttime open space usage:*

##### **3. Frequency: How often do you visit these spaces during nighttime?**

1. very often - every day
2. often - once or twice per week
3. rarely - one or twice per month
4. almost never

Answer: 3) rarely - one or twice per month

##### **4. Duration: How much time do you usually spend in these places during nighttime?**

1. more than 1 hour
2. around 30 minutes
3. 10-15 minutes
4. couple of minutes

Answer: 1) more than 1 hour

##### **5. Activity: What type of activities do you engage in these spaces during nighttime?**

1. leisure and socialization- hanging out with friends or walking the dog
2. recreation - walking, running, cycling, exercise
3. relaxing by myself
4. just passing through
5. Other / walking the dog

Answer: 1) leisure and socialization- hangingt out with friends or walking the dog

##### **6. When spending time in open space during nighttime what is the most important spatial feature that influence the position and means of usage?**

1. urban furniture and pedestrian/bicycle paths
2. greenery and water proximity
3. Lightning
4. Other: \_\_\_\_\_

Answer: 3) Lightning

##### **7. Are you satisfied with the position and overall quality of artificial lightning in these spaces?**

(Choose grade from 1 to 5; 1-not at all, 5-very satisfied)

Answer: 3

##### **8. Do you feel comfortable and safe in these spaces during nighttime?**

1. Yes
2. No

Answer: No

### The questionnaire No: 4

Are you conducting a survey and or interview?

1. Yes
2. No

Answer: Yes

You have been asked to complete this survey as part of scientific research "*Increasing the livability of open public space during nighttime: the importance of lightning in the waterfront areas*". The study is designed to determine the usage dynamics of the waterfront area. Your responses are entirely voluntary, and you may refuse to complete any part or all of this survey. This survey is designed to be anonymous, meaning that there should be no way to connect your responses with you. Toward that end, please do not sign your name to the survey, or include any information in your responses that makes it easy to identify you. By completing and submitting the survey, you affirm that you are at least 18 years old and that you give your consent to use your answers in this research.

#### *General information:*

Age:

1. 18-25;
2. 25-40;
3. 40-55;
4. 55+

Answer: 18-25

Gender

1. Female
2. Male

Answer: Male

#### *PART A: Open space usage:*

**1. Do you use open public space in the waterfront area?**

1. Yes
2. No

Answer: Yes

**2. Time period: When do you use these spaces the most?**

1. in the morning
2. in the afternoon
3. in the evening/during nighttime
4. other: in the morning and in the evening

Answer: 2) in the afternoon

## The questionnaire No: 4

### *PART B: Nighttime open space usage:*

#### **3. Frequency: How often do you visit these spaces during nighttime?**

1. very often - every day
2. often - once or twice per week
3. rarely - one or twice per month
4. almost never

Answer: 2) often - once or twice per week

#### **4. Duration: How much time do you usually spend in these places during nighttime?**

1. more than 1 hour
2. around 30 minutes
3. 10-15 minutes
4. couple of minutes

Answer: 1) more than 1 hour

#### **5. Activity: What type of activities do you engage in these spaces during nighttime?**

1. leisure and socialization- hanging out with friends or walking the dog
2. recreation - walking, running, cycling, exercise
3. relaxing by myself
4. just passing through
5. Other / walking the dog

Answer: 3) relaxing by myself

#### **6. When spending time in open space during nighttime what is the most important spatial feature that influence the position and means of usage?**

1. urban furniture and pedestrian/bicycle paths
2. greenery and water proximity
3. Lightning
4. Other: \_\_\_\_\_

Answer: 2) greenery and water proximity

#### **7. Are you satisfied with the position and overall quality of artificial lightning in these spaces?**

(Choose grade from 1 to 5; 1-not at all, 5-very satisfied)

Answer: 1

#### **8. Do you feel comfortable and safe in these spaces during nighttime?**

1. Yes
2. No

Answer: No

### The questionnaire No: 5

Are you conducting a survey and or interview?

1. Yes
2. No

Answer: Yes

You have been asked to complete this survey as part of scientific research "*Increasing the livability of open public space during nighttime: the importance of lightning in the waterfront areas*". The study is designed to determine the usage dynamics of the waterfront area. Your responses are entirely voluntary, and you may refuse to complete any part or all of this survey. This survey is designed to be anonymous, meaning that there should be no way to connect your responses with you. Toward that end, please do not sign your name to the survey, or include any information in your responses that makes it easy to identify you. By completing and submitting the survey, you affirm that you are at least 18 years old and that you give your consent to use your answers in this research.

*General information:*

Age:

1. 18-25;
2. 25-40;
3. 40-55;
4. 55+

Answer: 18-25

Gender

1. Female
2. Male

Answer: Female

*PART A: Open space usage:*

**1. Do you use open public space in the waterfront area?**

1. Yes
2. No

Answer: Yes

**2. Time period: When do you use these spaces the most?**

1. in the morning
2. in the afternoon
3. in the evening/during nighttime
4. other: in the morning and in the evening

Answer: 4) other: in the morning and in the evening

## The questionnaire No: 5

### *PART B: Nighttime open space usage:*

#### **3. Frequency: How often do you visit these spaces during nighttime?**

1. very often - every day
2. often - once or twice per week
3. rarely - one or twice per month
4. almost never

Answer: 3) rarely - one or twice per month

#### **4. Duration: How much time do you usually spend in these places during nighttime?**

1. more than 1 hour
2. around 30 minutes
3. 10-15 minutes
4. couple of minutes

Answer: 2) around 30 minutes

#### **5. Activity: What type of activities do you engage in these spaces during nighttime?**

1. leisure and socialization- hanging out with friends or walking the dog
2. recreation - walking, running, cycling, exercise
3. relaxing by myself
4. just passing through
5. Other / walking the dog

Answer: 2) recreation - walking, running, cycling, exercise

#### **6. When spending time in open space during nighttime what is the most important spatial feature that influence the position and means of usage?**

1. urban furniture and pedestrian/bicycle paths
2. greenery and water proximity
3. Lightning
4. Other: \_\_\_\_\_

Answer: 2) greenery and water proximity

#### **7. Are you satisfied with the position and overall quality of artificial lightning in these spaces?** (Choose grade from 1 to 5; 1-not at all, 5-very satisfied)

Answer: 5

#### **8. Do you feel comfortable and safe in these spaces during nighttime?**

1. Yes
2. No

Answer: No

## The questionnaire No: 6

Are you conducting a survey and or interview?

1. Yes
2. No

Answer: Yes

You have been asked to complete this survey as part of scientific research "*Increasing the livability of open public space during nighttime: the importance of lightning in the waterfront areas*". The study is designed to determine the usage dynamics of the waterfront area. Your responses are entirely voluntary, and you may refuse to complete any part or all of this survey. This survey is designed to be anonymous, meaning that there should be no way to connect your responses with you. Toward that end, please do not sign your name to the survey, or include any information in your responses that makes it easy to identify you. By completing and submitting the survey, you affirm that you are at least 18 years old and that you give your consent to use your answers in this research.

### *General information:*

Age:

1. 18-25;
2. 25-40;
3. 40-55;
4. 55+

Answer: 40-55

Gender

1. Female
2. Male

Answer: Female

### *PART A: Open space usage:*

**1. Do you use open public space in the waterfront area?**

1. Yes
2. No

Answer: Yes

**2. Time period: When do you use these spaces the most?**

1. in the morning
2. in the afternoon
3. in the evening/during nighttime
4. other: in the morning and in the evening

Answer: 3) in the evening/during nighttime

The questionnaire No: 6

*PART B: Nighttime open space usage:*

**3. Frequency: How often do you visit these spaces during nighttime?**

1. very often - every day
2. often - once or twice per week
3. rarely - one or twice per month
4. almost never

Answer: 2) often - once or twice per week

**4. Duration: How much time do you usually spend in these places during nighttime?**

1. more than 1 hour
2. around 30 minutes
3. 10-15 minutes
4. couple of minutes

Answer: 4) couple of minutes

**5. Activity: What type of activities do you engage in these spaces during nighttime?**

1. leisure and socialization- hanging out with friends or walking the dog
2. recreation - walking, running, cycling, exercise
3. relaxing by myself
4. just passing through
5. Other / walking the dog

Answer: 4) just passing through

**6. When spending time in open space during nighttime what is the most important spatial feature that influence the position and means of usage?**

1. urban furniture and pedestrian/bicycle paths
2. greenery and water proximity
3. Lightning
4. Other: \_\_\_\_\_

Answer: 2) greenery and water proximity

**7. Are you satisfied with the position and overall quality of artificial lightning in these spaces?**  
(Choose grade from 1 to 5; 1-not at all, 5-very satisfied)

Answer: 3

**8. Do you feel comfortable and safe in these spaces during nighttime?**

1. Yes
2. No

Answer: No

## The questionnaire No: 7

Are you conducting a survey and or interview?

1. Yes
2. No

Answer: Yes

You have been asked to complete this survey as part of scientific research "*Increasing the livability of open public space during nighttime: the importance of lightning in the waterfront areas*". The study is designed to determine the usage dynamics of the waterfront area. Your responses are entirely voluntary, and you may refuse to complete any part or all of this survey. This survey is designed to be anonymous, meaning that there should be no way to connect your responses with you. Toward that end, please do not sign your name to the survey, or include any information in your responses that makes it easy to identify you. By completing and submitting the survey, you affirm that you are at least 18 years old and that you give your consent to use your answers in this research.

### *General information:*

Age:

1. 18-25;
2. 25-40;
3. 40-55;
4. 55+

Answer: 18-25

Gender

1. Female
2. Male

Answer: Female

### *PART A: Open space usage:*

#### **1. Do you use open public space in the waterfront area?**

1. Yes
2. No

Answer: No

#### **2. Time period: When do you use these spaces the most?**

1. in the morning
2. in the afternoon
3. in the evening/during nighttime
4. other: in the morning and in the evening

Answer: 2) in the afternoon

The questionnaire No: 7

*PART B: Nighttime open space usage:*

**3. Frequency: How often do you visit these spaces during nighttime?**

1. very often - every day
2. often - once or twice per week
3. rarely - one or twice per month
4. almost never

Answer: 3) rarely - one or twice per month

**4. Duration: How much time do you usually spend in these places during nighttime?**

1. more than 1 hour
2. around 30 minutes
3. 10-15 minutes
4. couple of minutes

Answer: 1) more than 1 hour

**5. Activity: What type of activities do you engage in these spaces during nighttime?**

1. leisure and socialization- hanging out with friends or walking the dog
2. recreation - walking, running, cycling, exercise
3. relaxing by myself
4. just passing through
5. Other / walking the dog

Answer: 2) recreation - walking, running, cycling, exercise

**6. When spending time in open space during nighttime what is the most important spatial feature that influence the position and means of usage?**

1. urban furniture and pedestrian/bicycle paths
2. greenery and water proximity
3. Lightning
4. Other: \_\_\_\_\_

Answer: 1) urban furniture and pedestrian/bicycle paths

**7. Are you satisfied with the position and overall quality of artificial lightning in these spaces?**  
(Choose grade from 1 to 5; 1-not at all, 5-very satisfied)

Answer: 1

**8. Do you feel comfortable and safe in these spaces during nighttime?**

1. Yes
2. No

Answer: Yes

### The questionnaire No: 8

Are you conducting a survey and or interview?

1. Yes
2. No

Answer: Yes

You have been asked to complete this survey as part of scientific research "*Increasing the livability of open public space during nighttime: the importance of lightning in the waterfront areas*". The study is designed to determine the usage dynamics of the waterfront area. Your responses are entirely voluntary, and you may refuse to complete any part or all of this survey. This survey is designed to be anonymous, meaning that there should be no way to connect your responses with you. Toward that end, please do not sign your name to the survey, or include any information in your responses that makes it easy to identify you. By completing and submitting the survey, you affirm that you are at least 18 years old and that you give your consent to use your answers in this research.

*General information:*

Age:

1. 18-25;
2. 25-40;
3. 40-55;
4. 55+

Answer: 25-40

Gender

1. Female
2. Male

Answer: Female

*PART A: Open space usage:*

**1. Do you use open public space in the waterfront area?**

1. Yes
2. No

Answer: Yes

**2. Time period: When do you use these spaces the most?**

1. in the morning
2. in the afternoon
3. in the evening/during nighttime
4. other: in the morning and in the evening

Answer: 4) other: in the morning and in the evening

The questionnaire No: 8

*PART B: Nighttime open space usage:*

**3. Frequency: How often do you visit these spaces during nighttime?**

1. very often - every day
2. often - once or twice per week
3. rarely - one or twice per month
4. almost never

Answer: 3) rarely - one or twice per month

**4. Duration: How much time do you usually spend in these places during nighttime?**

1. more than 1 hour
2. around 30 minutes
3. 10-15 minutes
4. couple of minutes

Answer: 1) more than 1 hour

**5. Activity: What type of activities do you engage in these spaces during nighttime?**

1. leisure and socialization- hanging out with friends or walking the dog
2. recreation - walking, running, cycling, exercise
3. relaxing by myself
4. just passing through
5. Other / walking the dog

Answer: 1) leisure and socialization- hangingt out with friends or walking the dog

**6. When spending time in open space during nighttime what is the most important spatial feature that influence the position and means of usage?**

1. urban furniture and pedestrian/bicycle paths
2. greenery and water proximity
3. Lightning
4. Other: \_\_\_\_\_

Answer: 2) greenery and water proximity

**7. Are you satisfied with the position and overall quality of artificial lightning in these spaces?**  
(Choose grade from 1 to 5; 1-not at all, 5-very satisfied)

Answer: 3

**8. Do you feel comfortable and safe in these spaces during nighttime?**

1. Yes
2. No

Answer: No

## The questionnaire No: 9

Are you conducting a survey and or interview?

1. Yes
2. No

Answer: Yes

You have been asked to complete this survey as part of scientific research "*Increasing the livability of open public space during nighttime: the importance of lightning in the waterfront areas*". The study is designed to determine the usage dynamics of the waterfront area. Your responses are entirely voluntary, and you may refuse to complete any part or all of this survey. This survey is designed to be anonymous, meaning that there should be no way to connect your responses with you. Toward that end, please do not sign your name to the survey, or include any information in your responses that makes it easy to identify you. By completing and submitting the survey, you affirm that you are at least 18 years old and that you give your consent to use your answers in this research.

### *General information:*

Age:

1. 18-25;
2. 25-40;
3. 40-55;
4. 55+

Answer: 18-25

Gender

1. Female
2. Male

Answer: Female

### *PART A: Open space usage:*

**1. Do you use open public space in the waterfront area?**

1. Yes
2. No

Answer: Yes

**2. Time period: When do you use these spaces the most?**

1. in the morning
2. in the afternoon
3. in the evening/during nighttime
4. other: in the morning and in the evening

Answer: 1) in the morning

The questionnaire No: 9

*PART B: Nighttime open space usage:*

**3. Frequency: How often do you visit these spaces during nighttime?**

1. very often - every day
2. often - once or twice per week
3. rarely - one or twice per month
4. almost never

Answer: 3) rarely - one or twice per month

**4. Duration: How much time do you usually spend in these places during nighttime?**

1. more than 1 hour
2. around 30 minutes
3. 10-15 minutes
4. couple of minutes

Answer: 3) 10-15 minutes

**5. Activity: What type of activities do you engage in these spaces during nighttime?**

1. leisure and socialization- hanging out with friends or walking the dog
2. recreation - walking, running, cycling, exercise
3. relaxing by myself
4. just passing through
5. Other / walking the dog

Answer: 1) leisure and socialization- hangingt out with friends or walking the dog

**6. When spending time in open space during nighttime what is the most important spatial feature that influence the position and means of usage?**

1. urban furniture and pedestrian/bicycle paths
2. greenery and water proximity
3. Lightning
4. Other: \_\_\_\_\_

Answer: 2) greenery and water proximity

**7. Are you satisfied with the position and overall quality of artificial lightning in these spaces?**

(Choose grade from 1 to 5; 1-not at all, 5-very satisfied)

Answer: 2

**8. Do you feel comfortable and safe in these spaces during nighttime?**

1. Yes
2. No

Answer: Yes

### The questionnaire No: 10

Are you conducting a survey and or interview?

1. Yes
2. No

Answer: Yes

You have been asked to complete this survey as part of scientific research "*Increasing the livability of open public space during nighttime: the importance of lightning in the waterfront areas*". The study is designed to determine the usage dynamics of the waterfront area. Your responses are entirely voluntary, and you may refuse to complete any part or all of this survey. This survey is designed to be anonymous, meaning that there should be no way to connect your responses with you. Toward that end, please do not sign your name to the survey, or include any information in your responses that makes it easy to identify you. By completing and submitting the survey, you affirm that you are at least 18 years old and that you give your consent to use your answers in this research.

*General information:*

Age:

1. 18-25;
2. 25-40;
3. 40-55;
4. 55+

Answer: 25-40

Gender

1. Female
2. Male

Answer: Female

*PART A: Open space usage:*

**1. Do you use open public space in the waterfront area?**

1. Yes
2. No

Answer: Yes

**2. Time period: When do you use these spaces the most?**

1. in the morning
2. in the afternoon
3. in the evening/during nighttime
4. other: in the morning and in the evening

Answer: 2) in the afternoon

The questionnaire No: 10

*PART B: Nighttime open space usage:*

**3. Frequency: How often do you visit these spaces during nighttime?**

1. very often - every day
2. often - once or twice per week
3. rarely - one or twice per month
4. almost never

Answer: 1) very often - every day

**4. Duration: How much time do you usually spend in these places during nighttime?**

1. more than 1 hour
2. around 30 minutes
3. 10-15 minutes
4. couple of minutes

Answer: 2) around 30 minutes

**5. Activity: What type of activities do you engage in these spaces during nighttime?**

1. leisure and socialization- hanging out with friends or walking the dog
2. recreation - walking, running, cycling, exercise
3. relaxing by myself
4. just passing through
5. Other / walking the dog

Answer: 2) recreation - walking, running, cycling, exercise

**6. When spending time in open space during nighttime what is the most important spatial feature that influence the position and means of usage?**

1. urban furniture and pedestrian/bicycle paths
2. greenery and water proximity
3. Lightning
4. Other: \_\_\_\_\_

Answer: 3) Lightning

**7. Are you satisfied with the position and overall quality of artificial lightning in these spaces?**  
(Choose grade from 1 to 5; 1-not at all, 5-very satisfied)

Answer: 3

**8. Do you feel comfortable and safe in these spaces during nighttime?**

1. Yes
2. No

Answer: No

The questionnaire No: 11

Are you conducting a survey and or interview?

1. Yes
2. No

Answer: Yes

You have been asked to complete this survey as part of scientific research "*Increasing the livability of open public space during nighttime: the importance of lightning in the waterfront areas*". The study is designed to determine the usage dynamics of the waterfront area. Your responses are entirely voluntary, and you may refuse to complete any part or all of this survey. This survey is designed to be anonymous, meaning that there should be no way to connect your responses with you. Toward that end, please do not sign your name to the survey, or include any information in your responses that makes it easy to identify you. By completing and submitting the survey, you affirm that you are at least 18 years old and that you give your consent to use your answers in this research.

*General information:*

Age:

1. 18-25;
2. 25-40;
3. 40-55;
4. 55+

Answer: 18-25

Gender

1. Female
2. Male

Answer: Female

*PART A: Open space usage:*

**1. Do you use open public space in the waterfront area?**

1. Yes
2. No

Answer: Yes

**2. Time period: When do you use these spaces the most?**

1. in the morning
2. in the afternoon
3. in the evening/during nighttime
4. other: in the morning and in the evening

Answer: 4) other: in the morning and in the evening

The questionnaire No: 11

*PART B: Nighttime open space usage:*

**3. Frequency: How often do you visit these spaces during nighttime?**

1. very often - every day
2. often - once or twice per week
3. rarely - one or twice per month
4. almost never

Answer: 2) often - once or twice per week

**4. Duration: How much time do you usually spend in these places during nighttime?**

1. more than 1 hour
2. around 30 minutes
3. 10-15 minutes
4. couple of minutes

Answer: 4) couple of minutes

**5. Activity: What type of activities do you engage in these spaces during nighttime?**

1. leisure and socialization- hanging out with friends or walking the dog
2. recreation - walking, running, cycling, exercise
3. relaxing by myself
4. just passing through
5. Other / walking the dog

Answer: 1) leisure and socialization- hangingt out with friends or walking the dog

**6. When spending time in open space during nighttime what is the most important spatial feature that influence the position and means of usage?**

1. urban furniture and pedestrian/bicycle paths
2. greenery and water proximity
3. Lightning
4. Other: \_\_\_\_\_

Answer: Other: monuments

**7. Are you satisfied with the position and overall quality of artificial lightning in these spaces?**  
(Choose grade from 1 to 5; 1-not at all, 5-very satisfied)

Answer: 3

**8. Do you feel comfortable and safe in these spaces during nighttime?**

1. Yes
2. No

Answer: No

## The questionnaire No: 12

Are you conducting a survey and or interview?

1. Yes
2. No

Answer: Yes

You have been asked to complete this survey as part of scientific research "*Increasing the livability of open public space during nighttime: the importance of lightning in the waterfront areas*". The study is designed to determine the usage dynamics of the waterfront area. Your responses are entirely voluntary, and you may refuse to complete any part or all of this survey. This survey is designed to be anonymous, meaning that there should be no way to connect your responses with you. Toward that end, please do not sign your name to the survey, or include any information in your responses that makes it easy to identify you. By completing and submitting the survey, you affirm that you are at least 18 years old and that you give your consent to use your answers in this research.

*General information:*

Age:

1. 18-25;
2. 25-40;
3. 40-55;
4. 55+

Answer: 25-40

Gender

1. Female
2. Male

Answer: Female

*PART A: Open space usage:*

**1. Do you use open public space in the waterfront area?**

1. Yes
2. No

Answer: Yes

**2. Time period: When do you use these spaces the most?**

1. in the morning
2. in the afternoon
3. in the evening/during nighttime
4. other: in the morning and in the evening

Answer: 1) in the morning

The questionnaire No: 12

*PART B: Nighttime open space usage:*

**3. Frequency: How often do you visit these spaces during nighttime?**

1. very often - every day
2. often - once or twice per week
3. rarely - one or twice per month
4. almost never

Answer: 1) very often - every day

**4. Duration: How much time do you usually spend in these places during nighttime?**

1. more than 1 hour
2. around 30 minutes
3. 10-15 minutes
4. couple of minutes

Answer: 4) couple of minutes

**5. Activity: What type of activities do you engage in these spaces during nighttime?**

1. leisure and socialization- hanging out with friends or walking the dog
2. recreation - walking, running, cycling, exercise
3. relaxing by myself
4. just passing through
5. Other / walking the dog

Answer: 1) leisure and socialization- hangingt out with friends or walking the dog

**6. When spending time in open space during nighttime what is the most important spatial feature that influence the position and means of usage?**

1. urban furniture and pedestrian/bicycle paths
2. greenery and water proximity
3. Lightning
4. Other: \_\_\_\_\_

Answer: 2) greenery and water proximity

**7. Are you satisfied with the position and overall quality of artificial lightning in these spaces?**  
(Choose grade from 1 to 5; 1-not at all, 5-very satisfied)

Answer: 4

**8. Do you feel comfortable and safe in these spaces during nighttime?**

1. Yes
2. No

Answer: No

### The questionnaire No: 13

Are you conducting a survey and or interview?

1. Yes
2. No

Answer: Yes

You have been asked to complete this survey as part of scientific research "*Increasing the livability of open public space during nighttime: the importance of lightning in the waterfront areas*". The study is designed to determine the usage dynamics of the waterfront area. Your responses are entirely voluntary, and you may refuse to complete any part or all of this survey. This survey is designed to be anonymous, meaning that there should be no way to connect your responses with you. Toward that end, please do not sign your name to the survey, or include any information in your responses that makes it easy to identify you. By completing and submitting the survey, you affirm that you are at least 18 years old and that you give your consent to use your answers in this research.

*General information:*

Age:

1. 18-25;
2. 25-40;
3. 40-55;
4. 55+

Answer: 25-40

Gender

1. Female
2. Male

Answer: Female

*PART A: Open space usage:*

**1. Do you use open public space in the waterfront area?**

1. Yes
2. No

Answer: Yes

**2. Time period: When do you use these spaces the most?**

1. in the morning
2. in the afternoon
3. in the evening/during nighttime
4. other: in the morning and in the evening

Answer: 2) in the afternoon

The questionnaire No: 13

*PART B: Nighttime open space usage:*

**3. Frequency: How often do you visit these spaces during nighttime?**

1. very often - every day
2. often - once or twice per week
3. rarely - one or twice per month
4. almost never

Answer: 4) almost never

**4. Duration: How much time do you usually spend in these places during nighttime?**

1. more than 1 hour
2. around 30 minutes
3. 10-15 minutes
4. couple of minutes

Answer: 4) couple of minutes

**5. Activity: What type of activities do you engage in these spaces during nighttime?**

1. leisure and socialization- hanging out with friends or walking the dog
2. recreation - walking, running, cycling, exercise
3. relaxing by myself
4. just passing through
5. Other / walking the dog

Answer: 2) recreation - walking, running, cycling, exercise

**6. When spending time in open space during nighttime what is the most important spatial feature that influence the position and means of usage?**

1. urban furniture and pedestrian/bicycle paths
2. greenery and water proximity
3. Lightning
4. Other: \_\_\_\_\_

Answer: 2) greenery and water proximity

**7. Are you satisfied with the position and overall quality of artificial lightning in these spaces?**  
(Choose grade from 1 to 5; 1-not at all, 5-very satisfied)

Answer: 3

**8. Do you feel comfortable and safe in these spaces during nighttime?**

1. Yes
2. No

Answer: Yes

### The questionnaire No: 14

Are you conducting a survey and or interview?

1. Yes
2. No

Answer: Yes

You have been asked to complete this survey as part of scientific research "*Increasing the livability of open public space during nighttime: the importance of lightning in the waterfront areas*". The study is designed to determine the usage dynamics of the waterfront area. Your responses are entirely voluntary, and you may refuse to complete any part or all of this survey. This survey is designed to be anonymous, meaning that there should be no way to connect your responses with you. Toward that end, please do not sign your name to the survey, or include any information in your responses that makes it easy to identify you. By completing and submitting the survey, you affirm that you are at least 18 years old and that you give your consent to use your answers in this research.

*General information:*

Age:

1. 18-25;
2. 25-40;
3. 40-55;
4. 55+

Answer: 25-40

Gender

1. Female
2. Male

Answer: Female

*PART A: Open space usage:*

**1. Do you use open public space in the waterfront area?**

1. Yes
2. No

Answer: Yes

**2. Time period: When do you use these spaces the most?**

1. in the morning
2. in the afternoon
3. in the evening/during nighttime
4. other: in the morning and in the evening

Answer: 1) in the morning

The questionnaire No: 14

*PART B: Nighttime open space usage:*

**3. Frequency: How often do you visit these spaces during nighttime?**

1. very often - every day
2. often - once or twice per week
3. rarely - one or twice per month
4. almost never

Answer: 2) often - once or twice per week

**4. Duration: How much time do you usually spend in these places during nighttime?**

1. more than 1 hour
2. around 30 minutes
3. 10-15 minutes
4. couple of minutes

Answer: 1) more than 1 hour

**5. Activity: What type of activities do you engage in these spaces during nighttime?**

1. leisure and socialization- hanging out with friends or walking the dog
2. recreation - walking, running, cycling, exercise
3. relaxing by myself
4. just passing through
5. Other / walking the dog

Answer: 1) leisure and socialization- hangingt out with friends or walking the dog

**6. When spending time in open space during nighttime what is the most important spatial feature that influence the position and means of usage?**

1. urban furniture and pedestrian/bicycle paths
2. greenery and water proximity
3. Lightning
4. Other: \_\_\_\_\_

Answer: 2) greenery and water proximity

**7. Are you satisfied with the position and overall quality of artificial lightning in these spaces?**  
(Choose grade from 1 to 5; 1-not at all, 5-very satisfied)

Answer: 2

**8. Do you feel comfortable and safe in these spaces during nighttime?**

1. Yes
2. No

Answer: Yes

The questionnaire No: 15

Are you conducting a survey and or interview?

1. Yes
2. No

Answer: Yes

You have been asked to complete this survey as part of scientific research "*Increasing the livability of open public space during nighttime: the importance of lightning in the waterfront areas*". The study is designed to determine the usage dynamics of the waterfront area. Your responses are entirely voluntary, and you may refuse to complete any part or all of this survey. This survey is designed to be anonymous, meaning that there should be no way to connect your responses with you. Toward that end, please do not sign your name to the survey, or include any information in your responses that makes it easy to identify you. By completing and submitting the survey, you affirm that you are at least 18 years old and that you give your consent to use your answers in this research.

*General information:*

Age:

1. 18-25;
2. 25-40;
3. 40-55;
4. 55+

Answer: 18-25

Gender

1. Female
2. Male

Answer: Female

*PART A: Open space usage:*

**1. Do you use open public space in the waterfront area?**

1. Yes
2. No

Answer: Yes

**2. Time period: When do you use these spaces the most?**

1. in the morning
2. in the afternoon
3. in the evening/during nighttime
4. other: in the morning and in the evening

Answer: 2) in the afternoon

The questionnaire No: 15

*PART B: Nighttime open space usage:*

**3. Frequency: How often do you visit these spaces during nighttime?**

1. very often - every day
2. often - once or twice per week
3. rarely - one or twice per month
4. almost never

Answer: 1) very often - every day

**4. Duration: How much time do you usually spend in these places during nighttime?**

1. more than 1 hour
2. around 30 minutes
3. 10-15 minutes
4. couple of minutes

Answer: 1) more than 1 hour

**5. Activity: What type of activities do you engage in these spaces during nighttime?**

1. leisure and socialization- hanging out with friends or walking the dog
2. recreation - walking, running, cycling, exercise
3. relaxing by myself
4. just passing through
5. Other / walking the dog

Answer: 1) leisure and socialization- hangingt out with friends or walking the dog

**6. When spending time in open space during nighttime what is the most important spatial feature that influence the position and means of usage?**

1. urban furniture and pedestrian/bicycle paths
2. greenery and water proximity
3. Lightning
4. Other: \_\_\_\_\_

Answer: 3) Lightning

**7. Are you satisfied with the position and overall quality of artificial lightning in these spaces?**  
(Choose grade from 1 to 5; 1-not at all, 5-very satisfied)

Answer: 1

**8. Do you feel comfortable and safe in these spaces during nighttime?**

1. Yes
2. No

Answer: No

## The questionnaire No: 16

Are you conducting a survey and or interview?

1. Yes
2. No

Answer: Yes

You have been asked to complete this survey as part of scientific research "*Increasing the livability of open public space during nighttime: the importance of lightning in the waterfront areas*". The study is designed to determine the usage dynamics of the waterfront area. Your responses are entirely voluntary, and you may refuse to complete any part or all of this survey. This survey is designed to be anonymous, meaning that there should be no way to connect your responses with you. Toward that end, please do not sign your name to the survey, or include any information in your responses that makes it easy to identify you. By completing and submitting the survey, you affirm that you are at least 18 years old and that you give your consent to use your answers in this research.

*General information:*

Age:

1. 18-25;
2. 25-40;
3. 40-55;
4. 55+

Answer: 40-55

Gender

1. Female
2. Male

Answer: Male

*PART A: Open space usage:*

**1. Do you use open public space in the waterfront area?**

1. Yes
2. No

Answer: Yes

**2. Time period: When do you use these spaces the most?**

1. in the morning
2. in the afternoon
3. in the evening/during nighttime
4. other: in the morning and in the evening

Answer: 3) in the evening/during nighttime

The questionnaire No: 16

*PART B: Nighttime open space usage:*

**3. Frequency: How often do you visit these spaces during nighttime?**

1. very often - every day
2. often - once or twice per week
3. rarely - one or twice per month
4. almost never

Answer: 3) rarely - one or twice per month

**4. Duration: How much time do you usually spend in these places during nighttime?**

1. more than 1 hour
2. around 30 minutes
3. 10-15 minutes
4. couple of minutes

Answer: 1) more than 1 hour

**5. Activity: What type of activities do you engage in these spaces during nighttime?**

1. leisure and socialization- hanging out with friends or walking the dog
2. recreation - walking, running, cycling, exercise
3. relaxing by myself
4. just passing through
5. Other / walking the dog

Answer: 3) relaxing by myself

**6. When spending time in open space during nighttime what is the most important spatial feature that influence the position and means of usage?**

1. urban furniture and pedestrian/bicycle paths
2. greenery and water proximity
3. Lightning
4. Other: \_\_\_\_\_

Answer: 2) greenery and water proximity

**7. Are you satisfied with the position and overall quality of artificial lightning in these spaces?**  
(Choose grade from 1 to 5; 1-not at all, 5-very satisfied)

Answer: 3

**8. Do you feel comfortable and safe in these spaces during nighttime?**

1. Yes
2. No

Answer: No

### The questionnaire No: 17

Are you conducting a survey and or interview?

1. Yes
2. No

Answer: Yes

You have been asked to complete this survey as part of scientific research "*Increasing the livability of open public space during nighttime: the importance of lightning in the waterfront areas*". The study is designed to determine the usage dynamics of the waterfront area. Your responses are entirely voluntary, and you may refuse to complete any part or all of this survey. This survey is designed to be anonymous, meaning that there should be no way to connect your responses with you. Toward that end, please do not sign your name to the survey, or include any information in your responses that makes it easy to identify you. By completing and submitting the survey, you affirm that you are at least 18 years old and that you give your consent to use your answers in this research.

*General information:*

Age:

1. 18-25;
2. 25-40;
3. 40-55;
4. 55+

Answer: 18-25

Gender

1. Female
2. Male

Answer: Female

*PART A: Open space usage:*

**1. Do you use open public space in the waterfront area?**

1. Yes
2. No

Answer: Yes

**2. Time period: When do you use these spaces the most?**

1. in the morning
2. in the afternoon
3. in the evening/during nighttime
4. other: in the morning and in the evening

Answer: 2) in the afternoon

The questionnaire No: 17

*PART B: Nighttime open space usage:*

**3. Frequency: How often do you visit these spaces during nighttime?**

1. very often - every day
2. often - once or twice per week
3. rarely - one or twice per month
4. almost never

Answer: 1) very often - every day

**4. Duration: How much time do you usually spend in these places during nighttime?**

1. more than 1 hour
2. around 30 minutes
3. 10-15 minutes
4. couple of minutes

Answer: 1) more than 1 hour

**5. Activity: What type of activities do you engage in these spaces during nighttime?**

1. leisure and socialization- hanging out with friends or walking the dog
2. recreation - walking, running, cycling, exercise
3. relaxing by myself
4. just passing through
5. Other / walking the dog

Answer: 1) leisure and socialization- hangingt out with friends or walking the dog

**6. When spending time in open space during nighttime what is the most important spatial feature that influence the position and means of usage?**

1. urban furniture and pedestrian/bicycle paths
2. greenery and water proximity
3. Lightning
4. Other: \_\_\_\_\_

Answer: 1) urban furniture and pedestrian/bicycle paths

**7. Are you satisfied with the position and overall quality of artificial lightning in these spaces?**  
(Choose grade from 1 to 5; 1-not at all, 5-very satisfied)

Answer: 5

**8. Do you feel comfortable and safe in these spaces during nighttime?**

1. Yes
2. No

Answer: No

The questionnaire No: 18

Are you conducting a survey and or interview?

1. Yes
2. No

Answer: Yes

You have been asked to complete this survey as part of scientific research "*Increasing the livability of open public space during nighttime: the importance of lightning in the waterfront areas*". The study is designed to determine the usage dynamics of the waterfront area. Your responses are entirely voluntary, and you may refuse to complete any part or all of this survey. This survey is designed to be anonymous, meaning that there should be no way to connect your responses with you. Toward that end, please do not sign your name to the survey, or include any information in your responses that makes it easy to identify you. By completing and submitting the survey, you affirm that you are at least 18 years old and that you give your consent to use your answers in this research.

*General information:*

Age:

1. 18-25;
2. 25-40;
3. 40-55;
4. 55+

Answer: 40-55

Gender

1. Female
2. Male

Answer: Male

*PART A: Open space usage:*

**1. Do you use open public space in the waterfront area?**

1. Yes
2. No

Answer: No

**2. Time period: When do you use these spaces the most?**

1. in the morning
2. in the afternoon
3. in the evening/during nighttime
4. other: in the morning and in the evening

Answer: 3) in the evening/during nighttime

The questionnaire No: 18

*PART B: Nighttime open space usage:*

**3. Frequency: How often do you visit these spaces during nighttime?**

1. very often - every day
2. often - once or twice per week
3. rarely - one or twice per month
4. almost never

Answer: 3) rarely - one or twice per month

**4. Duration: How much time do you usually spend in these places during nighttime?**

1. more than 1 hour
2. around 30 minutes
3. 10-15 minutes
4. couple of minutes

Answer: 3) 10-15 minutes

**5. Activity: What type of activities do you engage in these spaces during nighttime?**

1. leisure and socialization- hanging out with friends or walking the dog
2. recreation - walking, running, cycling, exercise
3. relaxing by myself
4. just passing through
5. Other / walking the dog

Answer: 3) relaxing by myself

**6. When spending time in open space during nighttime what is the most important spatial feature that influence the position and means of usage?**

1. urban furniture and pedestrian/bicycle paths
2. greenery and water proximity
3. Lightning
4. Other: \_\_\_\_\_

Answer: Other: river restaurants

**7. Are you satisfied with the position and overall quality of artificial lightning in these spaces?**  
(Choose grade from 1 to 5; 1-not at all, 5-very satisfied)

Answer: 1

**8. Do you feel comfortable and safe in these spaces during nighttime?**

1. Yes
2. No

Answer: No

### The questionnaire No: 19

Are you conducting a survey and or interview?

1. Yes
2. No

Answer: Yes

You have been asked to complete this survey as part of scientific research "*Increasing the livability of open public space during nighttime: the importance of lightning in the waterfront areas*". The study is designed to determine the usage dynamics of the waterfront area. Your responses are entirely voluntary, and you may refuse to complete any part or all of this survey. This survey is designed to be anonymous, meaning that there should be no way to connect your responses with you. Toward that end, please do not sign your name to the survey, or include any information in your responses that makes it easy to identify you. By completing and submitting the survey, you affirm that you are at least 18 years old and that you give your consent to use your answers in this research.

*General information:*

Age:

1. 18-25;
2. 25-40;
3. 40-55;
4. 55+

Answer: 18-25

Gender

1. Female
2. Male

Answer: Male

*PART A: Open space usage:*

**1. Do you use open public space in the waterfront area?**

1. Yes
2. No

Answer: Yes

**2. Time period: When do you use these spaces the most?**

1. in the morning
2. in the afternoon
3. in the evening/during nighttime
4. other: in the morning and in the evening

Answer: 1) in the morning

The questionnaire No: 19

*PART B: Nighttime open space usage:*

**3. Frequency: How often do you visit these spaces during nighttime?**

1. very often - every day
2. often - once or twice per week
3. rarely - one or twice per month
4. almost never

Answer: 3) rarely - one or twice per month

**4. Duration: How much time do you usually spend in these places during nighttime?**

1. more than 1 hour
2. around 30 minutes
3. 10-15 minutes
4. couple of minutes

Answer: 4) couple of minutes

**5. Activity: What type of activities do you engage in these spaces during nighttime?**

1. leisure and socialization- hanging out with friends or walking the dog
2. recreation - walking, running, cycling, exercise
3. relaxing by myself
4. just passing through
5. Other / walking the dog

Answer: 2) recreation - walking, running, cycling, exercise

**6. When spending time in open space during nighttime what is the most important spatial feature that influence the position and means of usage?**

1. urban furniture and pedestrian/bicycle paths
2. greenery and water proximity
3. Lightning
4. Other: \_\_\_\_\_

Answer: 3) Lightning

**7. Are you satisfied with the position and overall quality of artificial lightning in these spaces?**  
(Choose grade from 1 to 5; 1-not at all, 5-very satisfied)

Answer: 2

**8. Do you feel comfortable and safe in these spaces during nighttime?**

1. Yes
2. No

Answer: No

## The questionnaire No: 20

Are you conducting a survey and or interview?

1. Yes
2. No

Answer: Yes

You have been asked to complete this survey as part of scientific research "*Increasing the livability of open public space during nighttime: the importance of lightning in the waterfront areas*". The study is designed to determine the usage dynamics of the waterfront area. Your responses are entirely voluntary, and you may refuse to complete any part or all of this survey. This survey is designed to be anonymous, meaning that there should be no way to connect your responses with you. Toward that end, please do not sign your name to the survey, or include any information in your responses that makes it easy to identify you. By completing and submitting the survey, you affirm that you are at least 18 years old and that you give your consent to use your answers in this research.

### *General information:*

Age:

1. 18-25;
2. 25-40;
3. 40-55;
4. 55+

Answer: 40-55

Gender

1. Female
2. Male

Answer: Female

### *PART A: Open space usage:*

**1. Do you use open public space in the waterfront area?**

1. Yes
2. No

Answer: Yes

**2. Time period: When do you use these spaces the most?**

1. in the morning
2. in the afternoon
3. in the evening/during nighttime
4. other: in the morning and in the evening

Answer: 1) in the morning

The questionnaire No: 20

*PART B: Nighttime open space usage:*

**3. Frequency: How often do you visit these spaces during nighttime?**

1. very often - every day
2. often - once or twice per week
3. rarely - one or twice per month
4. almost never

Answer: 3) rarely - one or twice per month

**4. Duration: How much time do you usually spend in these places during nighttime?**

1. more than 1 hour
2. around 30 minutes
3. 10-15 minutes
4. couple of minutes

Answer: 1) more than 1 hour

**5. Activity: What type of activities do you engage in these spaces during nighttime?**

1. leisure and socialization- hanging out with friends or walking the dog
2. recreation - walking, running, cycling, exercise
3. relaxing by myself
4. just passing through
5. Other / walking the dog

Answer: 2) recreation - walking, running, cycling, exercise

**6. When spending time in open space during nighttime what is the most important spatial feature that influence the position and means of usage?**

1. urban furniture and pedestrian/bicycle paths
2. greenery and water proximity
3. Lightning
4. Other: \_\_\_\_\_

Answer: 3) Lightning

**7. Are you satisfied with the position and overall quality of artificial lightning in these spaces?**  
(Choose grade from 1 to 5; 1-not at all, 5-very satisfied)

Answer: 4

**8. Do you feel comfortable and safe in these spaces during nighttime?**

1. Yes
2. No

Answer: No

The questionnaire No: 21

Are you conducting a survey and or interview?

1. Yes
2. No

Answer: Yes

You have been asked to complete this survey as part of scientific research "*Increasing the livability of open public space during nighttime: the importance of lightning in the waterfront areas*". The study is designed to determine the usage dynamics of the waterfront area. Your responses are entirely voluntary, and you may refuse to complete any part or all of this survey. This survey is designed to be anonymous, meaning that there should be no way to connect your responses with you. Toward that end, please do not sign your name to the survey, or include any information in your responses that makes it easy to identify you. By completing and submitting the survey, you affirm that you are at least 18 years old and that you give your consent to use your answers in this research.

*General information:*

Age:

1. 18-25;
2. 25-40;
3. 40-55;
4. 55+

Answer: 40-55

Gender

1. Female
2. Male

Answer: Female

*PART A: Open space usage:*

**1. Do you use open public space in the waterfront area?**

1. Yes
2. No

Answer: Yes

**2. Time period: When do you use these spaces the most?**

1. in the morning
2. in the afternoon
3. in the evening/during nighttime
4. other: in the morning and in the evening

Answer: 2) in the afternoon

The questionnaire No: 21

*PART B: Nighttime open space usage:*

**3. Frequency: How often do you visit these spaces during nighttime?**

1. very often - every day
2. often - once or twice per week
3. rarely - one or twice per month
4. almost never

Answer: 2) often - once or twice per week

**4. Duration: How much time do you usually spend in these places during nighttime?**

1. more than 1 hour
2. around 30 minutes
3. 10-15 minutes
4. couple of minutes

Answer: 1) more than 1 hour

**5. Activity: What type of activities do you engage in these spaces during nighttime?**

1. leisure and socialization- hanging out with friends or walking the dog
2. recreation - walking, running, cycling, exercise
3. relaxing by myself
4. just passing through
5. Other / walking the dog

Answer: 2) recreation - walking, running, cycling, exercise

**6. When spending time in open space during nighttime what is the most important spatial feature that influence the position and means of usage?**

1. urban furniture and pedestrian/bicycle paths
2. greenery and water proximity
3. Lightning
4. Other: \_\_\_\_\_

Answer: 1) urban furniture and pedestrian/bicycle paths

**7. Are you satisfied with the position and overall quality of artificial lightning in these spaces?**  
(Choose grade from 1 to 5; 1-not at all, 5-very satisfied)

Answer: 1

**8. Do you feel comfortable and safe in these spaces during nighttime?**

1. Yes
2. No

Answer: No

## The questionnaire No: 22

Are you conducting a survey and or interview?

1. Yes
2. No

Answer: Yes

You have been asked to complete this survey as part of scientific research "*Increasing the livability of open public space during nighttime: the importance of lightning in the waterfront areas*". The study is designed to determine the usage dynamics of the waterfront area. Your responses are entirely voluntary, and you may refuse to complete any part or all of this survey. This survey is designed to be anonymous, meaning that there should be no way to connect your responses with you. Toward that end, please do not sign your name to the survey, or include any information in your responses that makes it easy to identify you. By completing and submitting the survey, you affirm that you are at least 18 years old and that you give your consent to use your answers in this research.

*General information:*

Age:

1. 18-25;
2. 25-40;
3. 40-55;
4. 55+

Answer: 25-40

Gender

1. Female
2. Male

Answer: Female

*PART A: Open space usage:*

**1. Do you use open public space in the waterfront area?**

1. Yes
2. No

Answer: No

**2. Time period: When do you use these spaces the most?**

1. in the morning
2. in the afternoon
3. in the evening/during nighttime
4. other: in the morning and in the evening

Answer: 1) in the morning

The questionnaire No: 22

*PART B: Nighttime open space usage:*

**3. Frequency: How often do you visit these spaces during nighttime?**

1. very often - every day
2. often - once or twice per week
3. rarely - one or twice per month
4. almost never

Answer: 1) very often - every day

**4. Duration: How much time do you usually spend in these places during nighttime?**

1. more than 1 hour
2. around 30 minutes
3. 10-15 minutes
4. couple of minutes

Answer: 1) more than 1 hour

**5. Activity: What type of activities do you engage in these spaces during nighttime?**

1. leisure and socialization- hanging out with friends or walking the dog
2. recreation - walking, running, cycling, exercise
3. relaxing by myself
4. just passing through
5. Other / walking the dog

Answer: 1) leisure and socialization- hangingt out with friends or walking the dog

**6. When spending time in open space during nighttime what is the most important spatial feature that influence the position and means of usage?**

1. urban furniture and pedestrian/bicycle paths
2. greenery and water proximity
3. Lightning
4. Other: \_\_\_\_\_

Answer: 3) Lightning

**7. Are you satisfied with the position and overall quality of artificial lightning in these spaces?**  
(Choose grade from 1 to 5; 1-not at all, 5-very satisfied)

Answer: 1

**8. Do you feel comfortable and safe in these spaces during nighttime?**

1. Yes
2. No

Answer: Yes

### The questionnaire No: 23

Are you conducting a survey and or interview?

1. Yes
2. No

Answer: Yes

You have been asked to complete this survey as part of scientific research "*Increasing the livability of open public space during nighttime: the importance of lightning in the waterfront areas*". The study is designed to determine the usage dynamics of the waterfront area. Your responses are entirely voluntary, and you may refuse to complete any part or all of this survey. This survey is designed to be anonymous, meaning that there should be no way to connect your responses with you. Toward that end, please do not sign your name to the survey, or include any information in your responses that makes it easy to identify you. By completing and submitting the survey, you affirm that you are at least 18 years old and that you give your consent to use your answers in this research.

*General information:*

Age:

1. 18-25;
2. 25-40;
3. 40-55;
4. 55+

Answer: 40-55

Gender

1. Female
2. Male

Answer: Female

*PART A: Open space usage:*

**1. Do you use open public space in the waterfront area?**

1. Yes
2. No

Answer: Yes

**2. Time period: When do you use these spaces the most?**

1. in the morning
2. in the afternoon
3. in the evening/during nighttime
4. other: in the morning and in the evening

Answer: 2) in the afternoon

The questionnaire No: 23

*PART B: Nighttime open space usage:*

**3. Frequency: How often do you visit these spaces during nighttime?**

1. very often - every day
2. often - once or twice per week
3. rarely - one or twice per month
4. almost never

Answer: 2) often - once or twice per week

**4. Duration: How much time do you usually spend in these places during nighttime?**

1. more than 1 hour
2. around 30 minutes
3. 10-15 minutes
4. couple of minutes

Answer: 4) couple of minutes

**5. Activity: What type of activities do you engage in these spaces during nighttime?**

1. leisure and socialization- hanging out with friends or walking the dog
2. recreation - walking, running, cycling, exercise
3. relaxing by myself
4. just passing through
5. Other / walking the dog

Answer: 1) leisure and socialization- hangingt out with friends or walking the dog

**6. When spending time in open space during nighttime what is the most important spatial feature that influence the position and means of usage?**

1. urban furniture and pedestrian/bicycle paths
2. greenery and water proximity
3. Lightning
4. Other: \_\_\_\_\_

Answer: Other: river restaurants

**7. Are you satisfied with the position and overall quality of artificial lightning in these spaces?**  
(Choose grade from 1 to 5; 1-not at all, 5-very satisfied)

Answer: 2

**8. Do you feel comfortable and safe in these spaces during nighttime?**

1. Yes
2. No

Answer: No

## The questionnaire No: 24

Are you conducting a survey and or interview?

1. Yes
2. No

Answer: Yes

You have been asked to complete this survey as part of scientific research "*Increasing the livability of open public space during nighttime: the importance of lightning in the waterfront areas*". The study is designed to determine the usage dynamics of the waterfront area. Your responses are entirely voluntary, and you may refuse to complete any part or all of this survey. This survey is designed to be anonymous, meaning that there should be no way to connect your responses with you. Toward that end, please do not sign your name to the survey, or include any information in your responses that makes it easy to identify you. By completing and submitting the survey, you affirm that you are at least 18 years old and that you give your consent to use your answers in this research.

### *General information:*

Age:

1. 18-25;
2. 25-40;
3. 40-55;
4. 55+

Answer: 40-55

Gender

1. Female
2. Male

Answer: Male

### *PART A: Open space usage:*

**1. Do you use open public space in the waterfront area?**

1. Yes
2. No

Answer: Yes

**2. Time period: When do you use these spaces the most?**

1. in the morning
2. in the afternoon
3. in the evening/during nighttime
4. other: in the morning and in the evening

Answer: 3) in the evening/during nighttime

The questionnaire No: 24

*PART B: Nighttime open space usage:*

**3. Frequency: How often do you visit these spaces during nighttime?**

1. very often - every day
2. often - once or twice per week
3. rarely - one or twice per month
4. almost never

Answer: 2) often - once or twice per week

**4. Duration: How much time do you usually spend in these places during nighttime?**

1. more than 1 hour
2. around 30 minutes
3. 10-15 minutes
4. couple of minutes

Answer: 3) 10-15 minutes

**5. Activity: What type of activities do you engage in these spaces during nighttime?**

1. leisure and socialization- hanging out with friends or walking the dog
2. recreation - walking, running, cycling, exercise
3. relaxing by myself
4. just passing through
5. Other / walking the dog

Answer: 1) leisure and socialization- hangingt out with friends or walking the dog

**6. When spending time in open space during nighttime what is the most important spatial feature that influence the position and means of usage?**

1. urban furniture and pedestrian/bicycle paths
2. greenery and water proximity
3. Lightning
4. Other: \_\_\_\_\_

Answer: 3) Lightning

**7. Are you satisfied with the position and overall quality of artificial lightning in these spaces?**  
(Choose grade from 1 to 5; 1-not at all, 5-very satisfied)

Answer: 3

**8. Do you feel comfortable and safe in these spaces during nighttime?**

1. Yes
2. No

Answer: No

The questionnaire No: 25

Are you conducting a survey and or interview?

1. Yes
2. No

Answer: Yes

You have been asked to complete this survey as part of scientific research "*Increasing the livability of open public space during nighttime: the importance of lightning in the waterfront areas*". The study is designed to determine the usage dynamics of the waterfront area. Your responses are entirely voluntary, and you may refuse to complete any part or all of this survey. This survey is designed to be anonymous, meaning that there should be no way to connect your responses with you. Toward that end, please do not sign your name to the survey, or include any information in your responses that makes it easy to identify you. By completing and submitting the survey, you affirm that you are at least 18 years old and that you give your consent to use your answers in this research.

*General information:*

Age:

1. 18-25;
2. 25-40;
3. 40-55;
4. 55+

Answer: 40-55

Gender

1. Female
2. Male

Answer: Female

*PART A: Open space usage:*

**1. Do you use open public space in the waterfront area?**

1. Yes
2. No

Answer: No

**2. Time period: When do you use these spaces the most?**

1. in the morning
2. in the afternoon
3. in the evening/during nighttime
4. other: in the morning and in the evening

Answer: 3) in the evening/during nighttime

The questionnaire No: 25

*PART B: Nighttime open space usage:*

**3. Frequency: How often do you visit these spaces during nighttime?**

1. very often - every day
2. often - once or twice per week
3. rarely - one or twice per month
4. almost never

Answer: 2) often - once or twice per week

**4. Duration: How much time do you usually spend in these places during nighttime?**

1. more than 1 hour
2. around 30 minutes
3. 10-15 minutes
4. couple of minutes

Answer: 1) more than 1 hour

**5. Activity: What type of activities do you engage in these spaces during nighttime?**

1. leisure and socialization- hanging out with friends or walking the dog
2. recreation - walking, running, cycling, exercise
3. relaxing by myself
4. just passing through
5. Other / walking the dog

Answer: 1) leisure and socialization- hangingt out with friends or walking the dog

**6. When spending time in open space during nighttime what is the most important spatial feature that influence the position and means of usage?**

1. urban furniture and pedestrian/bicycle paths
2. greenery and water proximity
3. Lightning
4. Other: \_\_\_\_\_

Answer: 1) urban furniture and pedestrian/bicycle paths

**7. Are you satisfied with the position and overall quality of artificial lightning in these spaces?**  
(Choose grade from 1 to 5; 1-not at all, 5-very satisfied)

Answer: 2

**8. Do you feel comfortable and safe in these spaces during nighttime?**

1. Yes
2. No

Answer: No

## The questionnaire No: 26

Are you conducting a survey and or interview?

1. Yes
2. No

Answer: Yes

You have been asked to complete this survey as part of scientific research "*Increasing the livability of open public space during nighttime: the importance of lightning in the waterfront areas*". The study is designed to determine the usage dynamics of the waterfront area. Your responses are entirely voluntary, and you may refuse to complete any part or all of this survey. This survey is designed to be anonymous, meaning that there should be no way to connect your responses with you. Toward that end, please do not sign your name to the survey, or include any information in your responses that makes it easy to identify you. By completing and submitting the survey, you affirm that you are at least 18 years old and that you give your consent to use your answers in this research.

*General information:*

Age:

1. 18-25;
2. 25-40;
3. 40-55;
4. 55+

Answer: 18-25

Gender

1. Female
2. Male

Answer: Male

*PART A: Open space usage:*

**1. Do you use open public space in the waterfront area?**

1. Yes
2. No

Answer: No

**2. Time period: When do you use these spaces the most?**

1. in the morning
2. in the afternoon
3. in the evening/during nighttime
4. other: in the morning and in the evening

Answer: 2) in the afternoon

The questionnaire No: 26

*PART B: Nighttime open space usage:*

**3. Frequency: How often do you visit these spaces during nighttime?**

1. very often - every day
2. often - once or twice per week
3. rarely - one or twice per month
4. almost never

Answer: 2) often - once or twice per week

**4. Duration: How much time do you usually spend in these places during nighttime?**

1. more than 1 hour
2. around 30 minutes
3. 10-15 minutes
4. couple of minutes

Answer: 3) 10-15 minutes

**5. Activity: What type of activities do you engage in these spaces during nighttime?**

1. leisure and socialization- hanging out with friends or walking the dog
2. recreation - walking, running, cycling, exercise
3. relaxing by myself
4. just passing through
5. Other / walking the dog

Answer: 3) relaxing by myself

**6. When spending time in open space during nighttime what is the most important spatial feature that influence the position and means of usage?**

1. urban furniture and pedestrian/bicycle paths
2. greenery and water proximity
3. Lightning
4. Other: \_\_\_\_\_

Answer: 3) Lightning

**7. Are you satisfied with the position and overall quality of artificial lightning in these spaces?**  
(Choose grade from 1 to 5; 1-not at all, 5-very satisfied)

Answer: 4

**8. Do you feel comfortable and safe in these spaces during nighttime?**

1. Yes
2. No

Answer: No

The questionnaire No: 27

Are you conducting a survey and or interview?

1. Yes
2. No

Answer: Yes

You have been asked to complete this survey as part of scientific research "*Increasing the livability of open public space during nighttime: the importance of lightning in the waterfront areas*". The study is designed to determine the usage dynamics of the waterfront area. Your responses are entirely voluntary, and you may refuse to complete any part or all of this survey. This survey is designed to be anonymous, meaning that there should be no way to connect your responses with you. Toward that end, please do not sign your name to the survey, or include any information in your responses that makes it easy to identify you. By completing and submitting the survey, you affirm that you are at least 18 years old and that you give your consent to use your answers in this research.

*General information:*

Age:

1. 18-25;
2. 25-40;
3. 40-55;
4. 55+

Answer: 40-55

Gender

1. Female
2. Male

Answer: Female

*PART A: Open space usage:*

**1. Do you use open public space in the waterfront area?**

1. Yes
2. No

Answer: Yes

**2. Time period: When do you use these spaces the most?**

1. in the morning
2. in the afternoon
3. in the evening/during nighttime
4. other: in the morning and in the evening

Answer: 1) in the morning

The questionnaire No: 27

*PART B: Nighttime open space usage:*

**3. Frequency: How often do you visit these spaces during nighttime?**

1. very often - every day
2. often - once or twice per week
3. rarely - one or twice per month
4. almost never

Answer: 2) often - once or twice per week

**4. Duration: How much time do you usually spend in these places during nighttime?**

1. more than 1 hour
2. around 30 minutes
3. 10-15 minutes
4. couple of minutes

Answer: 1) more than 1 hour

**5. Activity: What type of activities do you engage in these spaces during nighttime?**

1. leisure and socialization- hanging out with friends or walking the dog
2. recreation - walking, running, cycling, exercise
3. relaxing by myself
4. just passing through
5. Other / walking the dog

Answer: 1) leisure and socialization- hangingt out with friends or walking the dog

**6. When spending time in open space during nighttime what is the most important spatial feature that influence the position and means of usage?**

1. urban furniture and pedestrian/bicycle paths
2. greenery and water proximity
3. Lightning
4. Other: \_\_\_\_\_

Answer: 3) Lightning

**7. Are you satisfied with the position and overall quality of artificial lightning in these spaces?**  
(Choose grade from 1 to 5; 1-not at all, 5-very satisfied)

Answer: 2

**8. Do you feel comfortable and safe in these spaces during nighttime?**

1. Yes
2. No

Answer: No

## The questionnaire No: 28

Are you conducting a survey and or interview?

1. Yes
2. No

Answer: Yes

You have been asked to complete this survey as part of scientific research "*Increasing the livability of open public space during nighttime: the importance of lightning in the waterfront areas*". The study is designed to determine the usage dynamics of the waterfront area. Your responses are entirely voluntary, and you may refuse to complete any part or all of this survey. This survey is designed to be anonymous, meaning that there should be no way to connect your responses with you. Toward that end, please do not sign your name to the survey, or include any information in your responses that makes it easy to identify you. By completing and submitting the survey, you affirm that you are at least 18 years old and that you give your consent to use your answers in this research.

*General information:*

Age:

1. 18-25;
2. 25-40;
3. 40-55;
4. 55+

Answer: 18-25

Gender

1. Female
2. Male

Answer: Male

*PART A: Open space usage:*

**1. Do you use open public space in the waterfront area?**

1. Yes
2. No

Answer: Yes

**2. Time period: When do you use these spaces the most?**

1. in the morning
2. in the afternoon
3. in the evening/during nighttime
4. other: in the morning and in the evening

Answer: 1) in the morning

The questionnaire No: 28

*PART B: Nighttime open space usage:*

**3. Frequency: How often do you visit these spaces during nighttime?**

1. very often - every day
2. often - once or twice per week
3. rarely - one or twice per month
4. almost never

Answer: 2) often - once or twice per week

**4. Duration: How much time do you usually spend in these places during nighttime?**

1. more than 1 hour
2. around 30 minutes
3. 10-15 minutes
4. couple of minutes

Answer: 1) more than 1 hour

**5. Activity: What type of activities do you engage in these spaces during nighttime?**

1. leisure and socialization- hanging out with friends or walking the dog
2. recreation - walking, running, cycling, exercise
3. relaxing by myself
4. just passing through
5. Other / walking the dog

Answer: 2) recreation - walking, running, cycling, exercise

**6. When spending time in open space during nighttime what is the most important spatial feature that influence the position and means of usage?**

1. urban furniture and pedestrian/bicycle paths
2. greenery and water proximity
3. Lightning
4. Other: \_\_\_\_\_

Answer: 2) greenery and water proximity

**7. Are you satisfied with the position and overall quality of artificial lightning in these spaces?**  
(Choose grade from 1 to 5; 1-not at all, 5-very satisfied)

Answer: 3

**8. Do you feel comfortable and safe in these spaces during nighttime?**

1. Yes
2. No

Answer: No

The questionnaire No: 29

Are you conducting a survey and or interview?

1. Yes
2. No

Answer: Yes

You have been asked to complete this survey as part of scientific research "*Increasing the livability of open public space during nighttime: the importance of lightning in the waterfront areas*". The study is designed to determine the usage dynamics of the waterfront area. Your responses are entirely voluntary, and you may refuse to complete any part or all of this survey. This survey is designed to be anonymous, meaning that there should be no way to connect your responses with you. Toward that end, please do not sign your name to the survey, or include any information in your responses that makes it easy to identify you. By completing and submitting the survey, you affirm that you are at least 18 years old and that you give your consent to use your answers in this research.

*General information:*

Age:

1. 18-25;
2. 25-40;
3. 40-55;
4. 55+

Answer: 18-25

Gender

1. Female
2. Male

Answer: Female

*PART A: Open space usage:*

**1. Do you use open public space in the waterfront area?**

1. Yes
2. No

Answer: Yes

**2. Time period: When do you use these spaces the most?**

1. in the morning
2. in the afternoon
3. in the evening/during nighttime
4. other: in the morning and in the evening

Answer: 1) in the morning

The questionnaire No: 29

*PART B: Nighttime open space usage:*

**3. Frequency: How often do you visit these spaces during nighttime?**

1. very often - every day
2. often - once or twice per week
3. rarely - one or twice per month
4. almost never

Answer: 1) very often - every day

**4. Duration: How much time do you usually spend in these places during nighttime?**

1. more than 1 hour
2. around 30 minutes
3. 10-15 minutes
4. couple of minutes

Answer: 1) more than 1 hour

**5. Activity: What type of activities do you engage in these spaces during nighttime?**

1. leisure and socialization- hanging out with friends or walking the dog
2. recreation - walking, running, cycling, exercise
3. relaxing by myself
4. just passing through
5. Other / walking the dog

Answer: 4) just passing through

**6. When spending time in open space during nighttime what is the most important spatial feature that influence the position and means of usage?**

1. urban furniture and pedestrian/bicycle paths
2. greenery and water proximity
3. Lightning
4. Other: \_\_\_\_\_

Answer: 1) urban furniture and pedestrian/bicycle paths

**7. Are you satisfied with the position and overall quality of artificial lightning in these spaces?**  
(Choose grade from 1 to 5; 1-not at all, 5-very satisfied)

Answer: 3

**8. Do you feel comfortable and safe in these spaces during nighttime?**

1. Yes
2. No

Answer: No

### The questionnaire No: 30

Are you conducting a survey and or interview?

1. Yes
2. No

Answer: Yes

You have been asked to complete this survey as part of scientific research "*Increasing the livability of open public space during nighttime: the importance of lightning in the waterfront areas*". The study is designed to determine the usage dynamics of the waterfront area. Your responses are entirely voluntary, and you may refuse to complete any part or all of this survey. This survey is designed to be anonymous, meaning that there should be no way to connect your responses with you. Toward that end, please do not sign your name to the survey, or include any information in your responses that makes it easy to identify you. By completing and submitting the survey, you affirm that you are at least 18 years old and that you give your consent to use your answers in this research.

*General information:*

Age:

1. 18-25;
2. 25-40;
3. 40-55;
4. 55+

Answer: 25-40

Gender

1. Female
2. Male

Answer: Female

*PART A: Open space usage:*

**1. Do you use open public space in the waterfront area?**

1. Yes
2. No

Answer: Yes

**2. Time period: When do you use these spaces the most?**

1. in the morning
2. in the afternoon
3. in the evening/during nighttime
4. other: in the morning and in the evening

Answer: 2) in the afternoon

The questionnaire No: 30

*PART B: Nighttime open space usage:*

**3. Frequency: How often do you visit these spaces during nighttime?**

1. very often - every day
2. often - once or twice per week
3. rarely - one or twice per month
4. almost never

Answer: 1) very often - every day

**4. Duration: How much time do you usually spend in these places during nighttime?**

1. more than 1 hour
2. around 30 minutes
3. 10-15 minutes
4. couple of minutes

Answer: 2) around 30 minutes

**5. Activity: What type of activities do you engage in these spaces during nighttime?**

1. leisure and socialization- hanging out with friends or walking the dog
2. recreation - walking, running, cycling, exercise
3. relaxing by myself
4. just passing through
5. Other / walking the dog

Answer: 1) leisure and socialization- hangingt out with friends or walking the dog

**6. When spending time in open space during nighttime what is the most important spatial feature that influence the position and means of usage?**

1. urban furniture and pedestrian/bicycle paths
2. greenery and water proximity
3. Lightning
4. Other: \_\_\_\_\_

Answer: 2) greenery and water proximity

**7. Are you satisfied with the position and overall quality of artificial lightning in these spaces?**  
(Choose grade from 1 to 5; 1-not at all, 5-very satisfied)

Answer: 5

**8. Do you feel comfortable and safe in these spaces during nighttime?**

1. Yes
2. No

Answer: No

The questionnaire No: 31

Are you conducting a survey and or interview?

1. Yes
2. No

Answer: Yes

You have been asked to complete this survey as part of scientific research "*Increasing the livability of open public space during nighttime: the importance of lightning in the waterfront areas*". The study is designed to determine the usage dynamics of the waterfront area. Your responses are entirely voluntary, and you may refuse to complete any part or all of this survey. This survey is designed to be anonymous, meaning that there should be no way to connect your responses with you. Toward that end, please do not sign your name to the survey, or include any information in your responses that makes it easy to identify you. By completing and submitting the survey, you affirm that you are at least 18 years old and that you give your consent to use your answers in this research.

*General information:*

Age:

1. 18-25;
2. 25-40;
3. 40-55;
4. 55+

Answer: 40-55

Gender

1. Female
2. Male

Answer: Male

*PART A: Open space usage:*

**1. Do you use open public space in the waterfront area?**

1. Yes
2. No

Answer: Yes

**2. Time period: When do you use these spaces the most?**

1. in the morning
2. in the afternoon
3. in the evening/during nighttime
4. other: in the morning and in the evening

Answer: 4) other: in the morning and in the evening

The questionnaire No: 31

*PART B: Nighttime open space usage:*

**3. Frequency: How often do you visit these spaces during nighttime?**

1. very often - every day
2. often - once or twice per week
3. rarely - one or twice per month
4. almost never

Answer: 3) rarely - one or twice per month

**4. Duration: How much time do you usually spend in these places during nighttime?**

1. more than 1 hour
2. around 30 minutes
3. 10-15 minutes
4. couple of minutes

Answer: 1) more than 1 hour

**5. Activity: What type of activities do you engage in these spaces during nighttime?**

1. leisure and socialization- hanging out with friends or walking the dog
2. recreation - walking, running, cycling, exercise
3. relaxing by myself
4. just passing through
5. Other / walking the dog

Answer: 4) just passing through

**6. When spending time in open space during nighttime what is the most important spatial feature that influence the position and means of usage?**

1. urban furniture and pedestrian/bicycle paths
2. greenery and water proximity
3. Lightning
4. Other: \_\_\_\_\_

Answer: 1) urban furniture and pedestrian/bicycle paths

**7. Are you satisfied with the position and overall quality of artificial lightning in these spaces?**  
(Choose grade from 1 to 5; 1-not at all, 5-very satisfied)

Answer: 2

**8. Do you feel comfortable and safe in these spaces during nighttime?**

1. Yes
2. No

Answer: Yes

## The questionnaire No: 32

Are you conducting a survey and or interview?

1. Yes
2. No

Answer: Yes

You have been asked to complete this survey as part of scientific research "*Increasing the livability of open public space during nighttime: the importance of lightning in the waterfront areas*". The study is designed to determine the usage dynamics of the waterfront area. Your responses are entirely voluntary, and you may refuse to complete any part or all of this survey. This survey is designed to be anonymous, meaning that there should be no way to connect your responses with you. Toward that end, please do not sign your name to the survey, or include any information in your responses that makes it easy to identify you. By completing and submitting the survey, you affirm that you are at least 18 years old and that you give your consent to use your answers in this research.

*General information:*

Age:

1. 18-25;
2. 25-40;
3. 40-55;
4. 55+

Answer: 40-55

Gender

1. Female
2. Male

Answer: Male

*PART A: Open space usage:*

**1. Do you use open public space in the waterfront area?**

1. Yes
2. No

Answer: Yes

**2. Time period: When do you use these spaces the most?**

1. in the morning
2. in the afternoon
3. in the evening/during nighttime
4. other: in the morning and in the evening

Answer: 2) in the afternoon

The questionnaire No: 32

*PART B: Nighttime open space usage:*

**3. Frequency: How often do you visit these spaces during nighttime?**

1. very often - every day
2. often - once or twice per week
3. rarely - one or twice per month
4. almost never

Answer: 2) often - once or twice per week

**4. Duration: How much time do you usually spend in these places during nighttime?**

1. more than 1 hour
2. around 30 minutes
3. 10-15 minutes
4. couple of minutes

Answer: 2) around 30 minutes

**5. Activity: What type of activities do you engage in these spaces during nighttime?**

1. leisure and socialization- hanging out with friends or walking the dog
2. recreation - walking, running, cycling, exercise
3. relaxing by myself
4. just passing through
5. Other / walking the dog

Answer: 3) relaxing by myself

**6. When spending time in open space during nighttime what is the most important spatial feature that influence the position and means of usage?**

1. urban furniture and pedestrian/bicycle paths
2. greenery and water proximity
3. Lightning
4. Other: \_\_\_\_\_

Answer: Other: monuments

**7. Are you satisfied with the position and overall quality of artificial lightning in these spaces?**  
(Choose grade from 1 to 5; 1-not at all, 5-very satisfied)

Answer: 2

**8. Do you feel comfortable and safe in these spaces during nighttime?**

1. Yes
2. No

Answer: Yes

### The questionnaire No: 33

Are you conducting a survey and or interview?

1. Yes
2. No

Answer: Yes

You have been asked to complete this survey as part of scientific research "*Increasing the livability of open public space during nighttime: the importance of lightning in the waterfront areas*". The study is designed to determine the usage dynamics of the waterfront area. Your responses are entirely voluntary, and you may refuse to complete any part or all of this survey. This survey is designed to be anonymous, meaning that there should be no way to connect your responses with you. Toward that end, please do not sign your name to the survey, or include any information in your responses that makes it easy to identify you. By completing and submitting the survey, you affirm that you are at least 18 years old and that you give your consent to use your answers in this research.

*General information:*

Age:

1. 18-25;
2. 25-40;
3. 40-55;
4. 55+

Answer: 25-40

Gender

1. Female
2. Male

Answer: Male

*PART A: Open space usage:*

**1. Do you use open public space in the waterfront area?**

1. Yes
2. No

Answer: Yes

**2. Time period: When do you use these spaces the most?**

1. in the morning
2. in the afternoon
3. in the evening/during nighttime
4. other: in the morning and in the evening

Answer: 4) other: in the morning and in the evening

The questionnaire No: 33

*PART B: Nighttime open space usage:*

**3. Frequency: How often do you visit these spaces during nighttime?**

1. very often - every day
2. often - once or twice per week
3. rarely - one or twice per month
4. almost never

Answer: 2) often - once or twice per week

**4. Duration: How much time do you usually spend in these places during nighttime?**

1. more than 1 hour
2. around 30 minutes
3. 10-15 minutes
4. couple of minutes

Answer: 2) around 30 minutes

**5. Activity: What type of activities do you engage in these spaces during nighttime?**

1. leisure and socialization- hanging out with friends or walking the dog
2. recreation - walking, running, cycling, exercise
3. relaxing by myself
4. just passing through
5. Other / walking the dog

Answer: 4) just passing through

**6. When spending time in open space during nighttime what is the most important spatial feature that influence the position and means of usage?**

1. urban furniture and pedestrian/bicycle paths
2. greenery and water proximity
3. Lightning
4. Other: \_\_\_\_\_

Answer: Other: river restaurants

**7. Are you satisfied with the position and overall quality of artificial lightning in these spaces?**  
(Choose grade from 1 to 5; 1-not at all, 5-very satisfied)

Answer: 2

**8. Do you feel comfortable and safe in these spaces during nighttime?**

1. Yes
2. No

Answer: No

The questionnaire No: 34

Are you conducting a survey and or interview?

1. Yes
2. No

Answer: Yes

You have been asked to complete this survey as part of scientific research "*Increasing the livability of open public space during nighttime: the importance of lightning in the waterfront areas*". The study is designed to determine the usage dynamics of the waterfront area. Your responses are entirely voluntary, and you may refuse to complete any part or all of this survey. This survey is designed to be anonymous, meaning that there should be no way to connect your responses with you. Toward that end, please do not sign your name to the survey, or include any information in your responses that makes it easy to identify you. By completing and submitting the survey, you affirm that you are at least 18 years old and that you give your consent to use your answers in this research.

*General information:*

Age:

1. 18-25;
2. 25-40;
3. 40-55;
4. 55+

Answer: 18-25

Gender

1. Female
2. Male

Answer: Female

*PART A: Open space usage:*

**1. Do you use open public space in the waterfront area?**

1. Yes
2. No

Answer: Yes

**2. Time period: When do you use these spaces the most?**

1. in the morning
2. in the afternoon
3. in the evening/during nighttime
4. other: in the morning and in the evening

Answer: 4) other: in the morning and in the evening

The questionnaire No: 34

*PART B: Nighttime open space usage:*

**3. Frequency: How often do you visit these spaces during nighttime?**

1. very often - every day
2. often - once or twice per week
3. rarely - one or twice per month
4. almost never

Answer: 1) very often - every day

**4. Duration: How much time do you usually spend in these places during nighttime?**

1. more than 1 hour
2. around 30 minutes
3. 10-15 minutes
4. couple of minutes

Answer: 1) more than 1 hour

**5. Activity: What type of activities do you engage in these spaces during nighttime?**

1. leisure and socialization- hanging out with friends or walking the dog
2. recreation - walking, running, cycling, exercise
3. relaxing by myself
4. just passing through
5. Other / walking the dog

Answer: 2) recreation - walking, running, cycling, exercise

**6. When spending time in open space during nighttime what is the most important spatial feature that influence the position and means of usage?**

1. urban furniture and pedestrian/bicycle paths
2. greenery and water proximity
3. Lightning
4. Other: \_\_\_\_\_

Answer: Other: river restaurants

**7. Are you satisfied with the position and overall quality of artificial lightning in these spaces?**  
(Choose grade from 1 to 5; 1-not at all, 5-very satisfied)

Answer: 3

**8. Do you feel comfortable and safe in these spaces during nighttime?**

1. Yes
2. No

Answer: No

The questionnaire No: 35

Are you conducting a survey and or interview?

1. Yes
2. No

Answer: Yes

You have been asked to complete this survey as part of scientific research "*Increasing the livability of open public space during nighttime: the importance of lightning in the waterfront areas*". The study is designed to determine the usage dynamics of the waterfront area. Your responses are entirely voluntary, and you may refuse to complete any part or all of this survey. This survey is designed to be anonymous, meaning that there should be no way to connect your responses with you. Toward that end, please do not sign your name to the survey, or include any information in your responses that makes it easy to identify you. By completing and submitting the survey, you affirm that you are at least 18 years old and that you give your consent to use your answers in this research.

*General information:*

Age:

1. 18-25;
2. 25-40;
3. 40-55;
4. 55+

Answer: 55+

Gender

1. Female
2. Male

Answer: Female

*PART A: Open space usage:*

**1. Do you use open public space in the waterfront area?**

1. Yes
2. No

Answer: Yes

**2. Time period: When do you use these spaces the most?**

1. in the morning
2. in the afternoon
3. in the evening/during nighttime
4. other: in the morning and in the evening

Answer: 1) in the morning

The questionnaire No: 35

*PART B: Nighttime open space usage:*

**3. Frequency: How often do you visit these spaces during nighttime?**

1. very often - every day
2. often - once or twice per week
3. rarely - one or twice per month
4. almost never

Answer: 3) rarely - one or twice per month

**4. Duration: How much time do you usually spend in these places during nighttime?**

1. more than 1 hour
2. around 30 minutes
3. 10-15 minutes
4. couple of minutes

Answer: 2) around 30 minutes

**5. Activity: What type of activities do you engage in these spaces during nighttime?**

1. leisure and socialization- hanging out with friends or walking the dog
2. recreation - walking, running, cycling, exercise
3. relaxing by myself
4. just passing through
5. Other / walking the dog

Answer: 4) just passing through

**6. When spending time in open space during nighttime what is the most important spatial feature that influence the position and means of usage?**

1. urban furniture and pedestrian/bicycle paths
2. greenery and water proximity
3. Lightning
4. Other: \_\_\_\_\_

Answer: 3) Lightning

**7. Are you satisfied with the position and overall quality of artificial lightning in these spaces?**  
(Choose grade from 1 to 5; 1-not at all, 5-very satisfied)

Answer: 1

**8. Do you feel comfortable and safe in these spaces during nighttime?**

1. Yes
2. No

Answer: Yes

### The questionnaire No: 36

Are you conducting a survey and or interview?

1. Yes
2. No

Answer: Yes

You have been asked to complete this survey as part of scientific research "*Increasing the livability of open public space during nighttime: the importance of lightning in the waterfront areas*". The study is designed to determine the usage dynamics of the waterfront area. Your responses are entirely voluntary, and you may refuse to complete any part or all of this survey. This survey is designed to be anonymous, meaning that there should be no way to connect your responses with you. Toward that end, please do not sign your name to the survey, or include any information in your responses that makes it easy to identify you. By completing and submitting the survey, you affirm that you are at least 18 years old and that you give your consent to use your answers in this research.

*General information:*

Age:

1. 18-25;
2. 25-40;
3. 40-55;
4. 55+

Answer: 25-40

Gender

1. Female
2. Male

Answer: Male

*PART A: Open space usage:*

**1. Do you use open public space in the waterfront area?**

1. Yes
2. No

Answer: Yes

**2. Time period: When do you use these spaces the most?**

1. in the morning
2. in the afternoon
3. in the evening/during nighttime
4. other: in the morning and in the evening

Answer: 2) in the afternoon

The questionnaire No: 36

*PART B: Nighttime open space usage:*

**3. Frequency: How often do you visit these spaces during nighttime?**

1. very often - every day
2. often - once or twice per week
3. rarely - one or twice per month
4. almost never

Answer: 3) rarely - one or twice per month

**4. Duration: How much time do you usually spend in these places during nighttime?**

1. more than 1 hour
2. around 30 minutes
3. 10-15 minutes
4. couple of minutes

Answer: 2) around 30 minutes

**5. Activity: What type of activities do you engage in these spaces during nighttime?**

1. leisure and socialization- hanging out with friends or walking the dog
2. recreation - walking, running, cycling, exercise
3. relaxing by myself
4. just passing through
5. Other / walking the dog

Answer: 1) leisure and socialization- hangingt out with friends or walking the dog

**6. When spending time in open space during nighttime what is the most important spatial feature that influence the position and means of usage?**

1. urban furniture and pedestrian/bicycle paths
2. greenery and water proximity
3. Lightning
4. Other: \_\_\_\_\_

Answer: 2) greenery and water proximity

**7. Are you satisfied with the position and overall quality of artificial lightning in these spaces?**  
(Choose grade from 1 to 5; 1-not at all, 5-very satisfied)

Answer: 4

**8. Do you feel comfortable and safe in these spaces during nighttime?**

1. Yes
2. No

Answer: No

The questionnaire No: 37

Are you conducting a survey and or interview?

1. Yes
2. No

Answer: Yes

You have been asked to complete this survey as part of scientific research "*Increasing the livability of open public space during nighttime: the importance of lightning in the waterfront areas*". The study is designed to determine the usage dynamics of the waterfront area. Your responses are entirely voluntary, and you may refuse to complete any part or all of this survey. This survey is designed to be anonymous, meaning that there should be no way to connect your responses with you. Toward that end, please do not sign your name to the survey, or include any information in your responses that makes it easy to identify you. By completing and submitting the survey, you affirm that you are at least 18 years old and that you give your consent to use your answers in this research.

*General information:*

Age:

1. 18-25;
2. 25-40;
3. 40-55;
4. 55+

Answer: 40-55

Gender

1. Female
2. Male

Answer: Male

*PART A: Open space usage:*

**1. Do you use open public space in the waterfront area?**

1. Yes
2. No

Answer: Yes

**2. Time period: When do you use these spaces the most?**

1. in the morning
2. in the afternoon
3. in the evening/during nighttime
4. other: in the morning and in the evening

Answer: 4) other: in the morning and in the evening

The questionnaire No: 37

*PART B: Nighttime open space usage:*

**3. Frequency: How often do you visit these spaces during nighttime?**

1. very often - every day
2. often - once or twice per week
3. rarely - one or twice per month
4. almost never

Answer: 3) rarely - one or twice per month

**4. Duration: How much time do you usually spend in these places during nighttime?**

1. more than 1 hour
2. around 30 minutes
3. 10-15 minutes
4. couple of minutes

Answer: 2) around 30 minutes

**5. Activity: What type of activities do you engage in these spaces during nighttime?**

1. leisure and socialization- hanging out with friends or walking the dog
2. recreation - walking, running, cycling, exercise
3. relaxing by myself
4. just passing through
5. Other / walking the dog

Answer: 4) just passing through

**6. When spending time in open space during nighttime what is the most important spatial feature that influence the position and means of usage?**

1. urban furniture and pedestrian/bicycle paths
2. greenery and water proximity
3. Lightning
4. Other: \_\_\_\_\_

Answer: 3) Lightning

**7. Are you satisfied with the position and overall quality of artificial lightning in these spaces?**  
(Choose grade from 1 to 5; 1-not at all, 5-very satisfied)

Answer: 3

**8. Do you feel comfortable and safe in these spaces during nighttime?**

1. Yes
2. No

Answer: No

The questionnaire No: 38

Are you conducting a survey and or interview?

1. Yes
2. No

Answer: Yes

You have been asked to complete this survey as part of scientific research "*Increasing the livability of open public space during nighttime: the importance of lightning in the waterfront areas*". The study is designed to determine the usage dynamics of the waterfront area. Your responses are entirely voluntary, and you may refuse to complete any part or all of this survey. This survey is designed to be anonymous, meaning that there should be no way to connect your responses with you. Toward that end, please do not sign your name to the survey, or include any information in your responses that makes it easy to identify you. By completing and submitting the survey, you affirm that you are at least 18 years old and that you give your consent to use your answers in this research.

*General information:*

Age:

1. 18-25;
2. 25-40;
3. 40-55;
4. 55+

Answer: 18-25

Gender

1. Female
2. Male

Answer: Male

*PART A: Open space usage:*

**1. Do you use open public space in the waterfront area?**

1. Yes
2. No

Answer: Yes

**2. Time period: When do you use these spaces the most?**

1. in the morning
2. in the afternoon
3. in the evening/during nighttime
4. other: in the morning and in the evening

Answer: 2) in the afternoon

The questionnaire No: 38

*PART B: Nighttime open space usage:*

**3. Frequency: How often do you visit these spaces during nighttime?**

1. very often - every day
2. often - once or twice per week
3. rarely - one or twice per month
4. almost never

Answer: 4) almost never

**4. Duration: How much time do you usually spend in these places during nighttime?**

1. more than 1 hour
2. around 30 minutes
3. 10-15 minutes
4. couple of minutes

Answer: 2) around 30 minutes

**5. Activity: What type of activities do you engage in these spaces during nighttime?**

1. leisure and socialization- hanging out with friends or walking the dog
2. recreation - walking, running, cycling, exercise
3. relaxing by myself
4. just passing through
5. Other / walking the dog

Answer: 1) leisure and socialization- hangingt out with friends or walking the dog

**6. When spending time in open space during nighttime what is the most important spatial feature that influence the position and means of usage?**

1. urban furniture and pedestrian/bicycle paths
2. greenery and water proximity
3. Lightning
4. Other: \_\_\_\_\_

Answer: 2) greenery and water proximity

**7. Are you satisfied with the position and overall quality of artificial lightning in these spaces?**  
(Choose grade from 1 to 5; 1-not at all, 5-very satisfied)

Answer: 5

**8. Do you feel comfortable and safe in these spaces during nighttime?**

1. Yes
2. No

Answer: No

### The questionnaire No: 39

Are you conducting a survey and or interview?

1. Yes
2. No

Answer: Yes

You have been asked to complete this survey as part of scientific research "*Increasing the livability of open public space during nighttime: the importance of lightning in the waterfront areas*". The study is designed to determine the usage dynamics of the waterfront area. Your responses are entirely voluntary, and you may refuse to complete any part or all of this survey. This survey is designed to be anonymous, meaning that there should be no way to connect your responses with you. Toward that end, please do not sign your name to the survey, or include any information in your responses that makes it easy to identify you. By completing and submitting the survey, you affirm that you are at least 18 years old and that you give your consent to use your answers in this research.

*General information:*

Age:

1. 18-25;
2. 25-40;
3. 40-55;
4. 55+

Answer: 25-40

Gender

1. Female
2. Male

Answer: Male

*PART A: Open space usage:*

**1. Do you use open public space in the waterfront area?**

1. Yes
2. No

Answer: Yes

**2. Time period: When do you use these spaces the most?**

1. in the morning
2. in the afternoon
3. in the evening/during nighttime
4. other: in the morning and in the evening

Answer: 1) in the morning

The questionnaire No: 39

*PART B: Nighttime open space usage:*

**3. Frequency: How often do you visit these spaces during nighttime?**

1. very often - every day
2. often - once or twice per week
3. rarely - one or twice per month
4. almost never

Answer: 3) rarely - one or twice per month

**4. Duration: How much time do you usually spend in these places during nighttime?**

1. more than 1 hour
2. around 30 minutes
3. 10-15 minutes
4. couple of minutes

Answer: 1) more than 1 hour

**5. Activity: What type of activities do you engage in these spaces during nighttime?**

1. leisure and socialization- hanging out with friends or walking the dog
2. recreation - walking, running, cycling, exercise
3. relaxing by myself
4. just passing through
5. Other / walking the dog

Answer: 1) leisure and socialization- hangingt out with friends or walking the dog

**6. When spending time in open space during nighttime what is the most important spatial feature that influence the position and means of usage?**

1. urban furniture and pedestrian/bicycle paths
2. greenery and water proximity
3. Lightning
4. Other: \_\_\_\_\_

Answer: 2) greenery and water proximity

**7. Are you satisfied with the position and overall quality of artificial lightning in these spaces?**

(Choose grade from 1 to 5; 1-not at all, 5-very satisfied)

Answer: 4

**8. Do you feel comfortable and safe in these spaces during nighttime?**

1. Yes
2. No

Answer: No

### The questionnaire No: 40

Are you conducting a survey and or interview?

1. Yes
2. No

Answer: Yes

You have been asked to complete this survey as part of scientific research "*Increasing the livability of open public space during nighttime: the importance of lightning in the waterfront areas*". The study is designed to determine the usage dynamics of the waterfront area. Your responses are entirely voluntary, and you may refuse to complete any part or all of this survey. This survey is designed to be anonymous, meaning that there should be no way to connect your responses with you. Toward that end, please do not sign your name to the survey, or include any information in your responses that makes it easy to identify you. By completing and submitting the survey, you affirm that you are at least 18 years old and that you give your consent to use your answers in this research.

*General information:*

Age:

1. 18-25;
2. 25-40;
3. 40-55;
4. 55+

Answer: 18-25

Gender

1. Female
2. Male

Answer: Female

*PART A: Open space usage:*

**1. Do you use open public space in the waterfront area?**

1. Yes
2. No

Answer: Yes

**2. Time period: When do you use these spaces the most?**

1. in the morning
2. in the afternoon
3. in the evening/during nighttime
4. other: in the morning and in the evening

Answer: 1) in the morning

The questionnaire No: 40

*PART B: Nighttime open space usage:*

**3. Frequency: How often do you visit these spaces during nighttime?**

1. very often - every day
2. often - once or twice per week
3. rarely - one or twice per month
4. almost never

Answer: 2) often - once or twice per week

**4. Duration: How much time do you usually spend in these places during nighttime?**

1. more than 1 hour
2. around 30 minutes
3. 10-15 minutes
4. couple of minutes

Answer: 2) around 30 minutes

**5. Activity: What type of activities do you engage in these spaces during nighttime?**

1. leisure and socialization- hanging out with friends or walking the dog
2. recreation - walking, running, cycling, exercise
3. relaxing by myself
4. just passing through
5. Other / walking the dog

Answer: 1) leisure and socialization- hangingt out with friends or walking the dog

**6. When spending time in open space during nighttime what is the most important spatial feature that influence the position and means of usage?**

1. urban furniture and pedestrian/bicycle paths
2. greenery and water proximity
3. Lightning
4. Other: \_\_\_\_\_

Answer: Other: monuments

**7. Are you satisfied with the position and overall quality of artificial lightning in these spaces?**

(Choose grade from 1 to 5; 1-not at all, 5-very satisfied)

Answer: 3

**8. Do you feel comfortable and safe in these spaces during nighttime?**

1. Yes
2. No

Answer: No

The questionnaire No: 41

Are you conducting a survey and or interview?

1. Yes
2. No

Answer: Yes

You have been asked to complete this survey as part of scientific research "*Increasing the livability of open public space during nighttime: the importance of lightning in the waterfront areas*". The study is designed to determine the usage dynamics of the waterfront area. Your responses are entirely voluntary, and you may refuse to complete any part or all of this survey. This survey is designed to be anonymous, meaning that there should be no way to connect your responses with you. Toward that end, please do not sign your name to the survey, or include any information in your responses that makes it easy to identify you. By completing and submitting the survey, you affirm that you are at least 18 years old and that you give your consent to use your answers in this research.

*General information:*

Age:

1. 18-25;
2. 25-40;
3. 40-55;
4. 55+

Answer: 18-25

Gender

1. Female
2. Male

Answer: Male

*PART A: Open space usage:*

**1. Do you use open public space in the waterfront area?**

1. Yes
2. No

Answer: Yes

**2. Time period: When do you use these spaces the most?**

1. in the morning
2. in the afternoon
3. in the evening/during nighttime
4. other: in the morning and in the evening

Answer: 1) in the morning

The questionnaire No: 41

*PART B: Nighttime open space usage:*

**3. Frequency: How often do you visit these spaces during nighttime?**

1. very often - every day
2. often - once or twice per week
3. rarely - one or twice per month
4. almost never

Answer: 3) rarely - one or twice per month

**4. Duration: How much time do you usually spend in these places during nighttime?**

1. more than 1 hour
2. around 30 minutes
3. 10-15 minutes
4. couple of minutes

Answer: 2) around 30 minutes

**5. Activity: What type of activities do you engage in these spaces during nighttime?**

1. leisure and socialization- hanging out with friends or walking the dog
2. recreation - walking, running, cycling, exercise
3. relaxing by myself
4. just passing through
5. Other / walking the dog

Answer: 4) just passing through

**6. When spending time in open space during nighttime what is the most important spatial feature that influence the position and means of usage?**

1. urban furniture and pedestrian/bicycle paths
2. greenery and water proximity
3. Lightning
4. Other: \_\_\_\_\_

Answer: 1) urban furniture and pedestrian/bicycle paths

**7. Are you satisfied with the position and overall quality of artificial lightning in these spaces?**  
(Choose grade from 1 to 5; 1-not at all, 5-very satisfied)

Answer: 3

**8. Do you feel comfortable and safe in these spaces during nighttime?**

1. Yes
2. No

Answer: Yes

The questionnaire No: 42

Are you conducting a survey and or interview?

1. Yes
2. No

Answer: Yes

You have been asked to complete this survey as part of scientific research "*Increasing the livability of open public space during nighttime: the importance of lightning in the waterfront areas*". The study is designed to determine the usage dynamics of the waterfront area. Your responses are entirely voluntary, and you may refuse to complete any part or all of this survey. This survey is designed to be anonymous, meaning that there should be no way to connect your responses with you. Toward that end, please do not sign your name to the survey, or include any information in your responses that makes it easy to identify you. By completing and submitting the survey, you affirm that you are at least 18 years old and that you give your consent to use your answers in this research.

*General information:*

Age:

1. 18-25;
2. 25-40;
3. 40-55;
4. 55+

Answer: 25-40

Gender

1. Female
2. Male

Answer: Female

*PART A: Open space usage:*

**1. Do you use open public space in the waterfront area?**

1. Yes
2. No

Answer: Yes

**2. Time period: When do you use these spaces the most?**

1. in the morning
2. in the afternoon
3. in the evening/during nighttime
4. other: in the morning and in the evening

Answer: 2) in the afternoon

The questionnaire No: 42

*PART B: Nighttime open space usage:*

**3. Frequency: How often do you visit these spaces during nighttime?**

1. very often - every day
2. often - once or twice per week
3. rarely - one or twice per month
4. almost never

Answer: 2) often - once or twice per week

**4. Duration: How much time do you usually spend in these places during nighttime?**

1. more than 1 hour
2. around 30 minutes
3. 10-15 minutes
4. couple of minutes

Answer: 1) more than 1 hour

**5. Activity: What type of activities do you engage in these spaces during nighttime?**

1. leisure and socialization- hanging out with friends or walking the dog
2. recreation - walking, running, cycling, exercise
3. relaxing by myself
4. just passing through
5. Other / walking the dog

Answer: 3) relaxing by myself

**6. When spending time in open space during nighttime what is the most important spatial feature that influence the position and means of usage?**

1. urban furniture and pedestrian/bicycle paths
2. greenery and water proximity
3. Lightning
4. Other: \_\_\_\_\_

Answer: 2) greenery and water proximity

**7. Are you satisfied with the position and overall quality of artificial lightning in these spaces?**

(Choose grade from 1 to 5; 1-not at all, 5-very satisfied)

Answer: 3

**8. Do you feel comfortable and safe in these spaces during nighttime?**

1. Yes
2. No

Answer: No

The questionnaire No: 43

Are you conducting a survey and or interview?

1. Yes
2. No

Answer: Yes

You have been asked to complete this survey as part of scientific research "*Increasing the livability of open public space during nighttime: the importance of lightning in the waterfront areas*". The study is designed to determine the usage dynamics of the waterfront area. Your responses are entirely voluntary, and you may refuse to complete any part or all of this survey. This survey is designed to be anonymous, meaning that there should be no way to connect your responses with you. Toward that end, please do not sign your name to the survey, or include any information in your responses that makes it easy to identify you. By completing and submitting the survey, you affirm that you are at least 18 years old and that you give your consent to use your answers in this research.

*General information:*

Age:

1. 18-25;
2. 25-40;
3. 40-55;
4. 55+

Answer: 25-40

Gender

1. Female
2. Male

Answer: Male

*PART A: Open space usage:*

**1. Do you use open public space in the waterfront area?**

1. Yes
2. No

Answer: Yes

**2. Time period: When do you use these spaces the most?**

1. in the morning
2. in the afternoon
3. in the evening/during nighttime
4. other: in the morning and in the evening

Answer: 3) in the evening/during nighttime

The questionnaire No: 43

*PART B: Nighttime open space usage:*

**3. Frequency: How often do you visit these spaces during nighttime?**

1. very often - every day
2. often - once or twice per week
3. rarely - one or twice per month
4. almost never

Answer: 2) often - once or twice per week

**4. Duration: How much time do you usually spend in these places during nighttime?**

1. more than 1 hour
2. around 30 minutes
3. 10-15 minutes
4. couple of minutes

Answer: 2) around 30 minutes

**5. Activity: What type of activities do you engage in these spaces during nighttime?**

1. leisure and socialization- hanging out with friends or walking the dog
2. recreation - walking, running, cycling, exercise
3. relaxing by myself
4. just passing through
5. Other / walking the dog

Answer: 3) relaxing by myself

**6. When spending time in open space during nighttime what is the most important spatial feature that influence the position and means of usage?**

1. urban furniture and pedestrian/bicycle paths
2. greenery and water proximity
3. Lightning
4. Other: \_\_\_\_\_

Answer: 3) Lightning

**7. Are you satisfied with the position and overall quality of artificial lightning in these spaces?**  
(Choose grade from 1 to 5; 1-not at all, 5-very satisfied)

Answer: 3

**8. Do you feel comfortable and safe in these spaces during nighttime?**

1. Yes
2. No

Answer: Yes

The questionnaire No: 44

Are you conducting a survey and or interview?

1. Yes
2. No

Answer: Yes

You have been asked to complete this survey as part of scientific research "*Increasing the livability of open public space during nighttime: the importance of lightning in the waterfront areas*". The study is designed to determine the usage dynamics of the waterfront area. Your responses are entirely voluntary, and you may refuse to complete any part or all of this survey. This survey is designed to be anonymous, meaning that there should be no way to connect your responses with you. Toward that end, please do not sign your name to the survey, or include any information in your responses that makes it easy to identify you. By completing and submitting the survey, you affirm that you are at least 18 years old and that you give your consent to use your answers in this research.

*General information:*

Age:

1. 18-25;
2. 25-40;
3. 40-55;
4. 55+

Answer: 25-40

Gender

1. Female
2. Male

Answer: Female

*PART A: Open space usage:*

**1. Do you use open public space in the waterfront area?**

1. Yes
2. No

Answer: Yes

**2. Time period: When do you use these spaces the most?**

1. in the morning
2. in the afternoon
3. in the evening/during nighttime
4. other: in the morning and in the evening

Answer: 4) other: in the morning and in the evening

The questionnaire No: 44

*PART B: Nighttime open space usage:*

**3. Frequency: How often do you visit these spaces during nighttime?**

1. very often - every day
2. often - once or twice per week
3. rarely - one or twice per month
4. almost never

Answer: 3) rarely - one or twice per month

**4. Duration: How much time do you usually spend in these places during nighttime?**

1. more than 1 hour
2. around 30 minutes
3. 10-15 minutes
4. couple of minutes

Answer: 2) around 30 minutes

**5. Activity: What type of activities do you engage in these spaces during nighttime?**

1. leisure and socialization- hanging out with friends or walking the dog
2. recreation - walking, running, cycling, exercise
3. relaxing by myself
4. just passing through
5. Other / walking the dog

Answer: 2) recreation - walking, running, cycling, exercise

**6. When spending time in open space during nighttime what is the most important spatial feature that influence the position and means of usage?**

1. urban furniture and pedestrian/bicycle paths
2. greenery and water proximity
3. Lightning
4. Other: \_\_\_\_\_

Answer: 3) Lightning

**7. Are you satisfied with the position and overall quality of artificial lightning in these spaces?**  
(Choose grade from 1 to 5; 1-not at all, 5-very satisfied)

Answer: 2

**8. Do you feel comfortable and safe in these spaces during nighttime?**

1. Yes
2. No

Answer: Yes

The questionnaire No: 45

Are you conducting a survey and or interview?

1. Yes
2. No

Answer: Yes

You have been asked to complete this survey as part of scientific research "*Increasing the livability of open public space during nighttime: the importance of lightning in the waterfront areas*". The study is designed to determine the usage dynamics of the waterfront area. Your responses are entirely voluntary, and you may refuse to complete any part or all of this survey. This survey is designed to be anonymous, meaning that there should be no way to connect your responses with you. Toward that end, please do not sign your name to the survey, or include any information in your responses that makes it easy to identify you. By completing and submitting the survey, you affirm that you are at least 18 years old and that you give your consent to use your answers in this research.

*General information:*

Age:

1. 18-25;
2. 25-40;
3. 40-55;
4. 55+

Answer: 25-40

Gender

1. Female
2. Male

Answer: Male

*PART A: Open space usage:*

**1. Do you use open public space in the waterfront area?**

1. Yes
2. No

Answer: No

**2. Time period: When do you use these spaces the most?**

1. in the morning
2. in the afternoon
3. in the evening/during nighttime
4. other: in the morning and in the evening

Answer: 1) in the morning

The questionnaire No: 45

*PART B: Nighttime open space usage:*

**3. Frequency: How often do you visit these spaces during nighttime?**

1. very often - every day
2. often - once or twice per week
3. rarely - one or twice per month
4. almost never

Answer: 2) often - once or twice per week

**4. Duration: How much time do you usually spend in these places during nighttime?**

1. more than 1 hour
2. around 30 minutes
3. 10-15 minutes
4. couple of minutes

Answer: 3) 10-15 minutes

**5. Activity: What type of activities do you engage in these spaces during nighttime?**

1. leisure and socialization- hanging out with friends or walking the dog
2. recreation - walking, running, cycling, exercise
3. relaxing by myself
4. just passing through
5. Other / walking the dog

Answer: 1) leisure and socialization- hangingt out with friends or walking the dog

**6. When spending time in open space during nighttime what is the most important spatial feature that influence the position and means of usage?**

1. urban furniture and pedestrian/bicycle paths
2. greenery and water proximity
3. Lightning
4. Other: \_\_\_\_\_

Answer: 3) Lightning

**7. Are you satisfied with the position and overall quality of artificial lightning in these spaces?**

(Choose grade from 1 to 5; 1-not at all, 5-very satisfied)

Answer: 2

**8. Do you feel comfortable and safe in these spaces during nighttime?**

1. Yes
2. No

Answer: No

## The questionnaire No: 46

Are you conducting a survey and or interview?

1. Yes
2. No

Answer: Yes

You have been asked to complete this survey as part of scientific research "*Increasing the livability of open public space during nighttime: the importance of lightning in the waterfront areas*". The study is designed to determine the usage dynamics of the waterfront area. Your responses are entirely voluntary, and you may refuse to complete any part or all of this survey. This survey is designed to be anonymous, meaning that there should be no way to connect your responses with you. Toward that end, please do not sign your name to the survey, or include any information in your responses that makes it easy to identify you. By completing and submitting the survey, you affirm that you are at least 18 years old and that you give your consent to use your answers in this research.

*General information:*

Age:

1. 18-25;
2. 25-40;
3. 40-55;
4. 55+

Answer: 18-25

Gender

1. Female
2. Male

Answer: Male

*PART A: Open space usage:*

**1. Do you use open public space in the waterfront area?**

1. Yes
2. No

Answer: Yes

**2. Time period: When do you use these spaces the most?**

1. in the morning
2. in the afternoon
3. in the evening/during nighttime
4. other: in the morning and in the evening

Answer: 1) in the morning

The questionnaire No: 46

*PART B: Nighttime open space usage:*

**3. Frequency: How often do you visit these spaces during nighttime?**

1. very often - every day
2. often - once or twice per week
3. rarely - one or twice per month
4. almost never

Answer: 1) very often - every day

**4. Duration: How much time do you usually spend in these places during nighttime?**

1. more than 1 hour
2. around 30 minutes
3. 10-15 minutes
4. couple of minutes

Answer: 2) around 30 minutes

**5. Activity: What type of activities do you engage in these spaces during nighttime?**

1. leisure and socialization- hanging out with friends or walking the dog
2. recreation - walking, running, cycling, exercise
3. relaxing by myself
4. just passing through
5. Other / walking the dog

Answer: 1) leisure and socialization- hangingt out with friends or walking the dog

**6. When spending time in open space during nighttime what is the most important spatial feature that influence the position and means of usage?**

1. urban furniture and pedestrian/bicycle paths
2. greenery and water proximity
3. Lightning
4. Other: \_\_\_\_\_

Answer: Other: river restaurants

**7. Are you satisfied with the position and overall quality of artificial lightning in these spaces?**  
(Choose grade from 1 to 5; 1-not at all, 5-very satisfied)

Answer: 2

**8. Do you feel comfortable and safe in these spaces during nighttime?**

1. Yes
2. No

Answer: No

The questionnaire No: 47

Are you conducting a survey and or interview?

1. Yes
2. No

Answer: Yes

You have been asked to complete this survey as part of scientific research "*Increasing the livability of open public space during nighttime: the importance of lightning in the waterfront areas*". The study is designed to determine the usage dynamics of the waterfront area. Your responses are entirely voluntary, and you may refuse to complete any part or all of this survey. This survey is designed to be anonymous, meaning that there should be no way to connect your responses with you. Toward that end, please do not sign your name to the survey, or include any information in your responses that makes it easy to identify you. By completing and submitting the survey, you affirm that you are at least 18 years old and that you give your consent to use your answers in this research.

*General information:*

Age:

1. 18-25;
2. 25-40;
3. 40-55;
4. 55+

Answer: 40-55

Gender

1. Female
2. Male

Answer: Female

*PART A: Open space usage:*

**1. Do you use open public space in the waterfront area?**

1. Yes
2. No

Answer: Yes

**2. Time period: When do you use these spaces the most?**

1. in the morning
2. in the afternoon
3. in the evening/during nighttime
4. other: in the morning and in the evening

Answer: 2) in the afternoon

The questionnaire No: 47

*PART B: Nighttime open space usage:*

**3. Frequency: How often do you visit these spaces during nighttime?**

1. very often - every day
2. often - once or twice per week
3. rarely - one or twice per month
4. almost never

Answer: 2) often - once or twice per week

**4. Duration: How much time do you usually spend in these places during nighttime?**

1. more than 1 hour
2. around 30 minutes
3. 10-15 minutes
4. couple of minutes

Answer: 3) 10-15 minutes

**5. Activity: What type of activities do you engage in these spaces during nighttime?**

1. leisure and socialization- hanging out with friends or walking the dog
2. recreation - walking, running, cycling, exercise
3. relaxing by myself
4. just passing through
5. Other / walking the dog

Answer: 1) leisure and socialization- hangingt out with friends or walking the dog

**6. When spending time in open space during nighttime what is the most important spatial feature that influence the position and means of usage?**

1. urban furniture and pedestrian/bicycle paths
2. greenery and water proximity
3. Lightning
4. Other: \_\_\_\_\_

Answer: 2) greenery and water proximity

**7. Are you satisfied with the position and overall quality of artificial lightning in these spaces?**

(Choose grade from 1 to 5; 1-not at all, 5-very satisfied)

Answer: 2

**8. Do you feel comfortable and safe in these spaces during nighttime?**

1. Yes
2. No

Answer: No

The questionnaire No: 48

Are you conducting a survey and or interview?

1. Yes
2. No

Answer: Yes

You have been asked to complete this survey as part of scientific research "*Increasing the livability of open public space during nighttime: the importance of lightning in the waterfront areas*". The study is designed to determine the usage dynamics of the waterfront area. Your responses are entirely voluntary, and you may refuse to complete any part or all of this survey. This survey is designed to be anonymous, meaning that there should be no way to connect your responses with you. Toward that end, please do not sign your name to the survey, or include any information in your responses that makes it easy to identify you. By completing and submitting the survey, you affirm that you are at least 18 years old and that you give your consent to use your answers in this research.

*General information:*

Age:

1. 18-25;
2. 25-40;
3. 40-55;
4. 55+

Answer: 18-25

Gender

1. Female
2. Male

Answer: Female

*PART A: Open space usage:*

**1. Do you use open public space in the waterfront area?**

1. Yes
2. No

Answer: Yes

**2. Time period: When do you use these spaces the most?**

1. in the morning
2. in the afternoon
3. in the evening/during nighttime
4. other: in the morning and in the evening

Answer: 3) in the evening/during nighttime

The questionnaire No: 48

*PART B: Nighttime open space usage:*

**3. Frequency: How often do you visit these spaces during nighttime?**

1. very often - every day
2. often - once or twice per week
3. rarely - one or twice per month
4. almost never

Answer: 3) rarely - one or twice per month

**4. Duration: How much time do you usually spend in these places during nighttime?**

1. more than 1 hour
2. around 30 minutes
3. 10-15 minutes
4. couple of minutes

Answer: 1) more than 1 hour

**5. Activity: What type of activities do you engage in these spaces during nighttime?**

1. leisure and socialization- hanging out with friends or walking the dog
2. recreation - walking, running, cycling, exercise
3. relaxing by myself
4. just passing through
5. Other / walking the dog

Answer: 2) recreation - walking, running, cycling, exercise

**6. When spending time in open space during nighttime what is the most important spatial feature that influence the position and means of usage?**

1. urban furniture and pedestrian/bicycle paths
2. greenery and water proximity
3. Lightning
4. Other: \_\_\_\_\_

Answer: 3) Lightning

**7. Are you satisfied with the position and overall quality of artificial lightning in these spaces?**  
(Choose grade from 1 to 5; 1-not at all, 5-very satisfied)

Answer: 1

**8. Do you feel comfortable and safe in these spaces during nighttime?**

1. Yes
2. No

Answer: No

The questionnaire No: 49

Are you conducting a survey and or interview?

1. Yes
2. No

Answer: Yes

You have been asked to complete this survey as part of scientific research "*Increasing the livability of open public space during nighttime: the importance of lightning in the waterfront areas*". The study is designed to determine the usage dynamics of the waterfront area. Your responses are entirely voluntary, and you may refuse to complete any part or all of this survey. This survey is designed to be anonymous, meaning that there should be no way to connect your responses with you. Toward that end, please do not sign your name to the survey, or include any information in your responses that makes it easy to identify you. By completing and submitting the survey, you affirm that you are at least 18 years old and that you give your consent to use your answers in this research.

*General information:*

Age:

1. 18-25;
2. 25-40;
3. 40-55;
4. 55+

Answer: 55+

Gender

1. Female
2. Male

Answer: Female

*PART A: Open space usage:*

**1. Do you use open public space in the waterfront area?**

1. Yes
2. No

Answer: No

**2. Time period: When do you use these spaces the most?**

1. in the morning
2. in the afternoon
3. in the evening/during nighttime
4. other: in the morning and in the evening

Answer: 2) in the afternoon

The questionnaire No: 49

*PART B: Nighttime open space usage:*

**3. Frequency: How often do you visit these spaces during nighttime?**

1. very often - every day
2. often - once or twice per week
3. rarely - one or twice per month
4. almost never

Answer: 3) rarely - one or twice per month

**4. Duration: How much time do you usually spend in these places during nighttime?**

1. more than 1 hour
2. around 30 minutes
3. 10-15 minutes
4. couple of minutes

Answer: 3) 10-15 minutes

**5. Activity: What type of activities do you engage in these spaces during nighttime?**

1. leisure and socialization- hanging out with friends or walking the dog
2. recreation - walking, running, cycling, exercise
3. relaxing by myself
4. just passing through
5. Other / walking the dog

Answer: 3) relaxing by myself

**6. When spending time in open space during nighttime what is the most important spatial feature that influence the position and means of usage?**

1. urban furniture and pedestrian/bicycle paths
2. greenery and water proximity
3. Lightning
4. Other: \_\_\_\_\_

Answer: 1) urban furniture and pedestrian/bicycle paths

**7. Are you satisfied with the position and overall quality of artificial lightning in these spaces?**  
(Choose grade from 1 to 5; 1-not at all, 5-very satisfied)

Answer: 2

**8. Do you feel comfortable and safe in these spaces during nighttime?**

1. Yes
2. No

Answer: No

## The questionnaire No: 50

Are you conducting a survey and or interview?

1. Yes
2. No

Answer: Yes

You have been asked to complete this survey as part of scientific research "*Increasing the livability of open public space during nighttime: the importance of lightning in the waterfront areas*". The study is designed to determine the usage dynamics of the waterfront area. Your responses are entirely voluntary, and you may refuse to complete any part or all of this survey. This survey is designed to be anonymous, meaning that there should be no way to connect your responses with you. Toward that end, please do not sign your name to the survey, or include any information in your responses that makes it easy to identify you. By completing and submitting the survey, you affirm that you are at least 18 years old and that you give your consent to use your answers in this research.

*General information:*

Age:

1. 18-25;
2. 25-40;
3. 40-55;
4. 55+

Answer: 25-40

Gender

1. Female
2. Male

Answer: Male

*PART A: Open space usage:*

**1. Do you use open public space in the waterfront area?**

1. Yes
2. No

Answer: Yes

**2. Time period: When do you use these spaces the most?**

1. in the morning
2. in the afternoon
3. in the evening/during nighttime
4. other: in the morning and in the evening

Answer: 2) in the afternoon

The questionnaire No: 50

*PART B: Nighttime open space usage:*

**3. Frequency: How often do you visit these spaces during nighttime?**

1. very often - every day
2. often - once or twice per week
3. rarely - one or twice per month
4. almost never

Answer: 4) almost never

**4. Duration: How much time do you usually spend in these places during nighttime?**

1. more than 1 hour
2. around 30 minutes
3. 10-15 minutes
4. couple of minutes

Answer: 1) more than 1 hour

**5. Activity: What type of activities do you engage in these spaces during nighttime?**

1. leisure and socialization- hanging out with friends or walking the dog
2. recreation - walking, running, cycling, exercise
3. relaxing by myself
4. just passing through
5. Other / walking the dog

Answer: 4) just passing through

**6. When spending time in open space during nighttime what is the most important spatial feature that influence the position and means of usage?**

1. urban furniture and pedestrian/bicycle paths
2. greenery and water proximity
3. Lightning
4. Other: \_\_\_\_\_

Answer: 3) Lightning

**7. Are you satisfied with the position and overall quality of artificial lightning in these spaces?**  
(Choose grade from 1 to 5; 1-not at all, 5-very satisfied)

Answer: 3

**8. Do you feel comfortable and safe in these spaces during nighttime?**

1. Yes
2. No

Answer: Yes

The questionnaire No: 51

Are you conducting a survey and or interview?

1. Yes
2. No

Answer: Yes

You have been asked to complete this survey as part of scientific research "*Increasing the livability of open public space during nighttime: the importance of lightning in the waterfront areas*". The study is designed to determine the usage dynamics of the waterfront area. Your responses are entirely voluntary, and you may refuse to complete any part or all of this survey. This survey is designed to be anonymous, meaning that there should be no way to connect your responses with you. Toward that end, please do not sign your name to the survey, or include any information in your responses that makes it easy to identify you. By completing and submitting the survey, you affirm that you are at least 18 years old and that you give your consent to use your answers in this research.

*General information:*

Age:

1. 18-25;
2. 25-40;
3. 40-55;
4. 55+

Answer: 18-25

Gender

1. Female
2. Male

Answer: Male

*PART A: Open space usage:*

**1. Do you use open public space in the waterfront area?**

1. Yes
2. No

Answer: Yes

**2. Time period: When do you use these spaces the most?**

1. in the morning
2. in the afternoon
3. in the evening/during nighttime
4. other: in the morning and in the evening

Answer: 4) other: in the morning and in the evening

The questionnaire No: 51

*PART B: Nighttime open space usage:*

**3. Frequency: How often do you visit these spaces during nighttime?**

1. very often - every day
2. often - once or twice per week
3. rarely - one or twice per month
4. almost never

Answer: 4) almost never

**4. Duration: How much time do you usually spend in these places during nighttime?**

1. more than 1 hour
2. around 30 minutes
3. 10-15 minutes
4. couple of minutes

Answer: 3) 10-15 minutes

**5. Activity: What type of activities do you engage in these spaces during nighttime?**

1. leisure and socialization- hanging out with friends or walking the dog
2. recreation - walking, running, cycling, exercise
3. relaxing by myself
4. just passing through
5. Other / walking the dog

Answer: 2) recreation - walking, running, cycling, exercise

**6. When spending time in open space during nighttime what is the most important spatial feature that influence the position and means of usage?**

1. urban furniture and pedestrian/bicycle paths
2. greenery and water proximity
3. Lightning
4. Other: \_\_\_\_\_

Answer: 3) Lightning

**7. Are you satisfied with the position and overall quality of artificial lightning in these spaces?**  
(Choose grade from 1 to 5; 1-not at all, 5-very satisfied)

Answer: 4

**8. Do you feel comfortable and safe in these spaces during nighttime?**

1. Yes
2. No

Answer: No

## The questionnaire No: 52

Are you conducting a survey and or interview?

1. Yes
2. No

Answer: Yes

You have been asked to complete this survey as part of scientific research "*Increasing the livability of open public space during nighttime: the importance of lightning in the waterfront areas*". The study is designed to determine the usage dynamics of the waterfront area. Your responses are entirely voluntary, and you may refuse to complete any part or all of this survey. This survey is designed to be anonymous, meaning that there should be no way to connect your responses with you. Toward that end, please do not sign your name to the survey, or include any information in your responses that makes it easy to identify you. By completing and submitting the survey, you affirm that you are at least 18 years old and that you give your consent to use your answers in this research.

*General information:*

Age:

1. 18-25;
2. 25-40;
3. 40-55;
4. 55+

Answer: 40-55

Gender

1. Female
2. Male

Answer: Female

*PART A: Open space usage:*

**1. Do you use open public space in the waterfront area?**

1. Yes
2. No

Answer: Yes

**2. Time period: When do you use these spaces the most?**

1. in the morning
2. in the afternoon
3. in the evening/during nighttime
4. other: in the morning and in the evening

Answer: 3) in the evening/during nighttime

The questionnaire No: 52

*PART B: Nighttime open space usage:*

**3. Frequency: How often do you visit these spaces during nighttime?**

1. very often - every day
2. often - once or twice per week
3. rarely - one or twice per month
4. almost never

Answer: 3) rarely - one or twice per month

**4. Duration: How much time do you usually spend in these places during nighttime?**

1. more than 1 hour
2. around 30 minutes
3. 10-15 minutes
4. couple of minutes

Answer: 1) more than 1 hour

**5. Activity: What type of activities do you engage in these spaces during nighttime?**

1. leisure and socialization- hanging out with friends or walking the dog
2. recreation - walking, running, cycling, exercise
3. relaxing by myself
4. just passing through
5. Other / walking the dog

Answer: 2) recreation - walking, running, cycling, exercise

**6. When spending time in open space during nighttime what is the most important spatial feature that influence the position and means of usage?**

1. urban furniture and pedestrian/bicycle paths
2. greenery and water proximity
3. Lightning
4. Other: \_\_\_\_\_

Answer: 3) Lightning

**7. Are you satisfied with the position and overall quality of artificial lightning in these spaces?**  
(Choose grade from 1 to 5; 1-not at all, 5-very satisfied)

Answer: 3

**8. Do you feel comfortable and safe in these spaces during nighttime?**

1. Yes
2. No

Answer: No

### The questionnaire No: 53

Are you conducting a survey and or interview?

1. Yes
2. No

Answer: Yes

You have been asked to complete this survey as part of scientific research "*Increasing the livability of open public space during nighttime: the importance of lightning in the waterfront areas*". The study is designed to determine the usage dynamics of the waterfront area. Your responses are entirely voluntary, and you may refuse to complete any part or all of this survey. This survey is designed to be anonymous, meaning that there should be no way to connect your responses with you. Toward that end, please do not sign your name to the survey, or include any information in your responses that makes it easy to identify you. By completing and submitting the survey, you affirm that you are at least 18 years old and that you give your consent to use your answers in this research.

*General information:*

Age:

1. 18-25;
2. 25-40;
3. 40-55;
4. 55+

Answer: 40-55

Gender

1. Female
2. Male

Answer: Female

*PART A: Open space usage:*

**1. Do you use open public space in the waterfront area?**

1. Yes
2. No

Answer: No

**2. Time period: When do you use these spaces the most?**

1. in the morning
2. in the afternoon
3. in the evening/during nighttime
4. other: in the morning and in the evening

Answer: 1) in the morning

The questionnaire No: 53

*PART B: Nighttime open space usage:*

**3. Frequency: How often do you visit these spaces during nighttime?**

1. very often - every day
2. often - once or twice per week
3. rarely - one or twice per month
4. almost never

Answer: 2) often - once or twice per week

**4. Duration: How much time do you usually spend in these places during nighttime?**

1. more than 1 hour
2. around 30 minutes
3. 10-15 minutes
4. couple of minutes

Answer: 2) around 30 minutes

**5. Activity: What type of activities do you engage in these spaces during nighttime?**

1. leisure and socialization- hanging out with friends or walking the dog
2. recreation - walking, running, cycling, exercise
3. relaxing by myself
4. just passing through
5. Other / walking the dog

Answer: 2) recreation - walking, running, cycling, exercise

**6. When spending time in open space during nighttime what is the most important spatial feature that influence the position and means of usage?**

1. urban furniture and pedestrian/bicycle paths
2. greenery and water proximity
3. Lightning
4. Other: \_\_\_\_\_

Answer: 3) Lightning

**7. Are you satisfied with the position and overall quality of artificial lightning in these spaces?**  
(Choose grade from 1 to 5; 1-not at all, 5-very satisfied)

Answer: 5

**8. Do you feel comfortable and safe in these spaces during nighttime?**

1. Yes
2. No

Answer: Yes

### The questionnaire No: 54

Are you conducting a survey and or interview?

1. Yes
2. No

Answer: Yes

You have been asked to complete this survey as part of scientific research "*Increasing the livability of open public space during nighttime: the importance of lightning in the waterfront areas*". The study is designed to determine the usage dynamics of the waterfront area. Your responses are entirely voluntary, and you may refuse to complete any part or all of this survey. This survey is designed to be anonymous, meaning that there should be no way to connect your responses with you. Toward that end, please do not sign your name to the survey, or include any information in your responses that makes it easy to identify you. By completing and submitting the survey, you affirm that you are at least 18 years old and that you give your consent to use your answers in this research.

#### *General information:*

Age:

1. 18-25;
2. 25-40;
3. 40-55;
4. 55+

Answer: 18-25

Gender

1. Female
2. Male

Answer: Female

#### *PART A: Open space usage:*

**1. Do you use open public space in the waterfront area?**

1. Yes
2. No

Answer: Yes

**2. Time period: When do you use these spaces the most?**

1. in the morning
2. in the afternoon
3. in the evening/during nighttime
4. other: in the morning and in the evening

Answer: 3) in the evening/during nighttime

The questionnaire No: 54

*PART B: Nighttime open space usage:*

**3. Frequency: How often do you visit these spaces during nighttime?**

1. very often - every day
2. often - once or twice per week
3. rarely - one or twice per month
4. almost never

Answer: 3) rarely - one or twice per month

**4. Duration: How much time do you usually spend in these places during nighttime?**

1. more than 1 hour
2. around 30 minutes
3. 10-15 minutes
4. couple of minutes

Answer: 1) more than 1 hour

**5. Activity: What type of activities do you engage in these spaces during nighttime?**

1. leisure and socialization- hanging out with friends or walking the dog
2. recreation - walking, running, cycling, exercise
3. relaxing by myself
4. just passing through
5. Other / walking the dog

Answer: 3) relaxing by myself

**6. When spending time in open space during nighttime what is the most important spatial feature that influence the position and means of usage?**

1. urban furniture and pedestrian/bicycle paths
2. greenery and water proximity
3. Lightning
4. Other: \_\_\_\_\_

Answer: 3) Lightning

**7. Are you satisfied with the position and overall quality of artificial lightning in these spaces?**  
(Choose grade from 1 to 5; 1-not at all, 5-very satisfied)

Answer: 3

**8. Do you feel comfortable and safe in these spaces during nighttime?**

1. Yes
2. No

Answer: No

The questionnaire No: 55

Are you conducting a survey and or interview?

1. Yes
2. No

Answer: Yes

You have been asked to complete this survey as part of scientific research "*Increasing the livability of open public space during nighttime: the importance of lightning in the waterfront areas*". The study is designed to determine the usage dynamics of the waterfront area. Your responses are entirely voluntary, and you may refuse to complete any part or all of this survey. This survey is designed to be anonymous, meaning that there should be no way to connect your responses with you. Toward that end, please do not sign your name to the survey, or include any information in your responses that makes it easy to identify you. By completing and submitting the survey, you affirm that you are at least 18 years old and that you give your consent to use your answers in this research.

*General information:*

Age:

1. 18-25;
2. 25-40;
3. 40-55;
4. 55+

Answer: 40-55

Gender

1. Female
2. Male

Answer: Female

*PART A: Open space usage:*

**1. Do you use open public space in the waterfront area?**

1. Yes
2. No

Answer: Yes

**2. Time period: When do you use these spaces the most?**

1. in the morning
2. in the afternoon
3. in the evening/during nighttime
4. other: in the morning and in the evening

Answer: 1) in the morning

The questionnaire No: 55

*PART B: Nighttime open space usage:*

**3. Frequency: How often do you visit these spaces during nighttime?**

1. very often - every day
2. often - once or twice per week
3. rarely - one or twice per month
4. almost never

Answer: 4) almost never

**4. Duration: How much time do you usually spend in these places during nighttime?**

1. more than 1 hour
2. around 30 minutes
3. 10-15 minutes
4. couple of minutes

Answer: 3) 10-15 minutes

**5. Activity: What type of activities do you engage in these spaces during nighttime?**

1. leisure and socialization- hanging out with friends or walking the dog
2. recreation - walking, running, cycling, exercise
3. relaxing by myself
4. just passing through
5. Other / walking the dog

Answer: 4) just passing through

**6. When spending time in open space during nighttime what is the most important spatial feature that influence the position and means of usage?**

1. urban furniture and pedestrian/bicycle paths
2. greenery and water proximity
3. Lightning
4. Other: \_\_\_\_\_

Answer: 3) Lightning

**7. Are you satisfied with the position and overall quality of artificial lightning in these spaces?**

(Choose grade from 1 to 5; 1-not at all, 5-very satisfied)

Answer: 1

**8. Do you feel comfortable and safe in these spaces during nighttime?**

1. Yes
2. No

Answer: No

The questionnaire No: 56

Are you conducting a survey and or interview?

1. Yes
2. No

Answer: Yes

You have been asked to complete this survey as part of scientific research "*Increasing the livability of open public space during nighttime: the importance of lightning in the waterfront areas*". The study is designed to determine the usage dynamics of the waterfront area. Your responses are entirely voluntary, and you may refuse to complete any part or all of this survey. This survey is designed to be anonymous, meaning that there should be no way to connect your responses with you. Toward that end, please do not sign your name to the survey, or include any information in your responses that makes it easy to identify you. By completing and submitting the survey, you affirm that you are at least 18 years old and that you give your consent to use your answers in this research.

*General information:*

Age:

1. 18-25;
2. 25-40;
3. 40-55;
4. 55+

Answer: 18-25

Gender

1. Female
2. Male

Answer: Female

*PART A: Open space usage:*

**1. Do you use open public space in the waterfront area?**

1. Yes
2. No

Answer: No

**2. Time period: When do you use these spaces the most?**

1. in the morning
2. in the afternoon
3. in the evening/during nighttime
4. other: in the morning and in the evening

Answer: 2) in the afternoon

The questionnaire No: 56

*PART B: Nighttime open space usage:*

**3. Frequency: How often do you visit these spaces during nighttime?**

1. very often - every day
2. often - once or twice per week
3. rarely - one or twice per month
4. almost never

Answer: 3) rarely - one or twice per month

**4. Duration: How much time do you usually spend in these places during nighttime?**

1. more than 1 hour
2. around 30 minutes
3. 10-15 minutes
4. couple of minutes

Answer: 1) more than 1 hour

**5. Activity: What type of activities do you engage in these spaces during nighttime?**

1. leisure and socialization- hanging out with friends or walking the dog
2. recreation - walking, running, cycling, exercise
3. relaxing by myself
4. just passing through
5. Other / walking the dog

Answer: 3) relaxing by myself

**6. When spending time in open space during nighttime what is the most important spatial feature that influence the position and means of usage?**

1. urban furniture and pedestrian/bicycle paths
2. greenery and water proximity
3. Lightning
4. Other: \_\_\_\_\_

Answer: Other: monuments

**7. Are you satisfied with the position and overall quality of artificial lightning in these spaces?**  
(Choose grade from 1 to 5; 1-not at all, 5-very satisfied)

Answer: 5

**8. Do you feel comfortable and safe in these spaces during nighttime?**

1. Yes
2. No

Answer: No

The questionnaire No: 57

Are you conducting a survey and or interview?

1. Yes
2. No

Answer: Yes

You have been asked to complete this survey as part of scientific research "*Increasing the livability of open public space during nighttime: the importance of lightning in the waterfront areas*". The study is designed to determine the usage dynamics of the waterfront area. Your responses are entirely voluntary, and you may refuse to complete any part or all of this survey. This survey is designed to be anonymous, meaning that there should be no way to connect your responses with you. Toward that end, please do not sign your name to the survey, or include any information in your responses that makes it easy to identify you. By completing and submitting the survey, you affirm that you are at least 18 years old and that you give your consent to use your answers in this research.

*General information:*

Age:

1. 18-25;
2. 25-40;
3. 40-55;
4. 55+

Answer: 18-25

Gender

1. Female
2. Male

Answer: Female

*PART A: Open space usage:*

**1. Do you use open public space in the waterfront area?**

1. Yes
2. No

Answer: Yes

**2. Time period: When do you use these spaces the most?**

1. in the morning
2. in the afternoon
3. in the evening/during nighttime
4. other: in the morning and in the evening

Answer: 2) in the afternoon

The questionnaire No: 57

*PART B: Nighttime open space usage:*

**3. Frequency: How often do you visit these spaces during nighttime?**

1. very often - every day
2. often - once or twice per week
3. rarely - one or twice per month
4. almost never

Answer: 1) very often - every day

**4. Duration: How much time do you usually spend in these places during nighttime?**

1. more than 1 hour
2. around 30 minutes
3. 10-15 minutes
4. couple of minutes

Answer: 1) more than 1 hour

**5. Activity: What type of activities do you engage in these spaces during nighttime?**

1. leisure and socialization- hanging out with friends or walking the dog
2. recreation - walking, running, cycling, exercise
3. relaxing by myself
4. just passing through
5. Other / walking the dog

Answer: 1) leisure and socialization- hangingt out with friends or walking the dog

**6. When spending time in open space during nighttime what is the most important spatial feature that influence the position and means of usage?**

1. urban furniture and pedestrian/bicycle paths
2. greenery and water proximity
3. Lightning
4. Other: \_\_\_\_\_

Answer: 3) Lightning

**7. Are you satisfied with the position and overall quality of artificial lightning in these spaces?**  
(Choose grade from 1 to 5; 1-not at all, 5-very satisfied)

Answer: 2

**8. Do you feel comfortable and safe in these spaces during nighttime?**

1. Yes
2. No

Answer: No

The questionnaire No: 58

Are you conducting a survey and or interview?

1. Yes
2. No

Answer: Yes

You have been asked to complete this survey as part of scientific research "*Increasing the livability of open public space during nighttime: the importance of lightning in the waterfront areas*". The study is designed to determine the usage dynamics of the waterfront area. Your responses are entirely voluntary, and you may refuse to complete any part or all of this survey. This survey is designed to be anonymous, meaning that there should be no way to connect your responses with you. Toward that end, please do not sign your name to the survey, or include any information in your responses that makes it easy to identify you. By completing and submitting the survey, you affirm that you are at least 18 years old and that you give your consent to use your answers in this research.

*General information:*

Age:

1. 18-25;
2. 25-40;
3. 40-55;
4. 55+

Answer: 18-25

Gender

1. Female
2. Male

Answer: Female

*PART A: Open space usage:*

**1. Do you use open public space in the waterfront area?**

1. Yes
2. No

Answer: Yes

**2. Time period: When do you use these spaces the most?**

1. in the morning
2. in the afternoon
3. in the evening/during nighttime
4. other: in the morning and in the evening

Answer: 1) in the morning

The questionnaire No: 58

*PART B: Nighttime open space usage:*

**3. Frequency: How often do you visit these spaces during nighttime?**

1. very often - every day
2. often - once or twice per week
3. rarely - one or twice per month
4. almost never

Answer: 4) almost never

**4. Duration: How much time do you usually spend in these places during nighttime?**

1. more than 1 hour
2. around 30 minutes
3. 10-15 minutes
4. couple of minutes

Answer: 3) 10-15 minutes

**5. Activity: What type of activities do you engage in these spaces during nighttime?**

1. leisure and socialization- hanging out with friends or walking the dog
2. recreation - walking, running, cycling, exercise
3. relaxing by myself
4. just passing through
5. Other / walking the dog

Answer: 1) leisure and socialization- hangingt out with friends or walking the dog

**6. When spending time in open space during nighttime what is the most important spatial feature that influence the position and means of usage?**

1. urban furniture and pedestrian/bicycle paths
2. greenery and water proximity
3. Lightning
4. Other: \_\_\_\_\_

Answer: Other: monuments

**7. Are you satisfied with the position and overall quality of artificial lightning in these spaces?**  
(Choose grade from 1 to 5; 1-not at all, 5-very satisfied)

Answer: 2

**8. Do you feel comfortable and safe in these spaces during nighttime?**

1. Yes
2. No

Answer: No

The questionnaire No: 59

Are you conducting a survey and or interview?

1. Yes
2. No

Answer: Yes

You have been asked to complete this survey as part of scientific research "*Increasing the livability of open public space during nighttime: the importance of lightning in the waterfront areas*". The study is designed to determine the usage dynamics of the waterfront area. Your responses are entirely voluntary, and you may refuse to complete any part or all of this survey. This survey is designed to be anonymous, meaning that there should be no way to connect your responses with you. Toward that end, please do not sign your name to the survey, or include any information in your responses that makes it easy to identify you. By completing and submitting the survey, you affirm that you are at least 18 years old and that you give your consent to use your answers in this research.

*General information:*

Age:

1. 18-25;
2. 25-40;
3. 40-55;
4. 55+

Answer: 25-40

Gender

1. Female
2. Male

Answer: Female

*PART A: Open space usage:*

**1. Do you use open public space in the waterfront area?**

1. Yes
2. No

Answer: Yes

**2. Time period: When do you use these spaces the most?**

1. in the morning
2. in the afternoon
3. in the evening/during nighttime
4. other: in the morning and in the evening

Answer: 3) in the evening/during nighttime

The questionnaire No: 59

*PART B: Nighttime open space usage:*

**3. Frequency: How often do you visit these spaces during nighttime?**

1. very often - every day
2. often - once or twice per week
3. rarely - one or twice per month
4. almost never

Answer: 3) rarely - one or twice per month

**4. Duration: How much time do you usually spend in these places during nighttime?**

1. more than 1 hour
2. around 30 minutes
3. 10-15 minutes
4. couple of minutes

Answer: 3) 10-15 minutes

**5. Activity: What type of activities do you engage in these spaces during nighttime?**

1. leisure and socialization- hanging out with friends or walking the dog
2. recreation - walking, running, cycling, exercise
3. relaxing by myself
4. just passing through
5. Other / walking the dog

Answer: 2) recreation - walking, running, cycling, exercise

**6. When spending time in open space during nighttime what is the most important spatial feature that influence the position and means of usage?**

1. urban furniture and pedestrian/bicycle paths
2. greenery and water proximity
3. Lightning
4. Other: \_\_\_\_\_

Answer: Other: monuments

**7. Are you satisfied with the position and overall quality of artificial lightning in these spaces?**  
(Choose grade from 1 to 5; 1-not at all, 5-very satisfied)

Answer: 1

**8. Do you feel comfortable and safe in these spaces during nighttime?**

1. Yes
2. No

Answer: Yes

The questionnaire No: 60

Are you conducting a survey and or interview?

1. Yes
2. No

Answer: Yes

You have been asked to complete this survey as part of scientific research "*Increasing the livability of open public space during nighttime: the importance of lightning in the waterfront areas*". The study is designed to determine the usage dynamics of the waterfront area. Your responses are entirely voluntary, and you may refuse to complete any part or all of this survey. This survey is designed to be anonymous, meaning that there should be no way to connect your responses with you. Toward that end, please do not sign your name to the survey, or include any information in your responses that makes it easy to identify you. By completing and submitting the survey, you affirm that you are at least 18 years old and that you give your consent to use your answers in this research.

*General information:*

Age:

1. 18-25;
2. 25-40;
3. 40-55;
4. 55+

Answer: 18-25

Gender

1. Female
2. Male

Answer: Female

*PART A: Open space usage:*

**1. Do you use open public space in the waterfront area?**

1. Yes
2. No

Answer: Yes

**2. Time period: When do you use these spaces the most?**

1. in the morning
2. in the afternoon
3. in the evening/during nighttime
4. other: in the morning and in the evening

Answer: 1) in the morning

The questionnaire No: 60

*PART B: Nighttime open space usage:*

**3. Frequency: How often do you visit these spaces during nighttime?**

1. very often - every day
2. often - once or twice per week
3. rarely - one or twice per month
4. almost never

Answer: 3) rarely - one or twice per month

**4. Duration: How much time do you usually spend in these places during nighttime?**

1. more than 1 hour
2. around 30 minutes
3. 10-15 minutes
4. couple of minutes

Answer: 2) around 30 minutes

**5. Activity: What type of activities do you engage in these spaces during nighttime?**

1. leisure and socialization- hanging out with friends or walking the dog
2. recreation - walking, running, cycling, exercise
3. relaxing by myself
4. just passing through
5. Other / walking the dog

Answer: 3) relaxing by myself

**6. When spending time in open space during nighttime what is the most important spatial feature that influence the position and means of usage?**

1. urban furniture and pedestrian/bicycle paths
2. greenery and water proximity
3. Lightning
4. Other: \_\_\_\_\_

Answer: 2) greenery and water proximity

**7. Are you satisfied with the position and overall quality of artificial lightning in these spaces?**

(Choose grade from 1 to 5; 1-not at all, 5-very satisfied)

Answer: 2

**8. Do you feel comfortable and safe in these spaces during nighttime?**

1. Yes
2. No

Answer: No

The questionnaire No: 61

Are you conducting a survey and or interview?

1. Yes
2. No

Answer: Yes

You have been asked to complete this survey as part of scientific research "*Increasing the livability of open public space during nighttime: the importance of lightning in the waterfront areas*". The study is designed to determine the usage dynamics of the waterfront area. Your responses are entirely voluntary, and you may refuse to complete any part or all of this survey. This survey is designed to be anonymous, meaning that there should be no way to connect your responses with you. Toward that end, please do not sign your name to the survey, or include any information in your responses that makes it easy to identify you. By completing and submitting the survey, you affirm that you are at least 18 years old and that you give your consent to use your answers in this research.

*General information:*

Age:

1. 18-25;
2. 25-40;
3. 40-55;
4. 55+

Answer: 25-40

Gender

1. Female
2. Male

Answer: Female

*PART A: Open space usage:*

**1. Do you use open public space in the waterfront area?**

1. Yes
2. No

Answer: Yes

**2. Time period: When do you use these spaces the most?**

1. in the morning
2. in the afternoon
3. in the evening/during nighttime
4. other: in the morning and in the evening

Answer: 2) in the afternoon

The questionnaire No: 61

*PART B: Nighttime open space usage:*

**3. Frequency: How often do you visit these spaces during nighttime?**

1. very often - every day
2. often - once or twice per week
3. rarely - one or twice per month
4. almost never

Answer: 4) almost never

**4. Duration: How much time do you usually spend in these places during nighttime?**

1. more than 1 hour
2. around 30 minutes
3. 10-15 minutes
4. couple of minutes

Answer: 3) 10-15 minutes

**5. Activity: What type of activities do you engage in these spaces during nighttime?**

1. leisure and socialization- hanging out with friends or walking the dog
2. recreation - walking, running, cycling, exercise
3. relaxing by myself
4. just passing through
5. Other / walking the dog

Answer: 1) leisure and socialization- hangingt out with friends or walking the dog

**6. When spending time in open space during nighttime what is the most important spatial feature that influence the position and means of usage?**

1. urban furniture and pedestrian/bicycle paths
2. greenery and water proximity
3. Lightning
4. Other: \_\_\_\_\_

Answer: Other: monuments

**7. Are you satisfied with the position and overall quality of artificial lightning in these spaces?**  
(Choose grade from 1 to 5; 1-not at all, 5-very satisfied)

Answer: 2

**8. Do you feel comfortable and safe in these spaces during nighttime?**

1. Yes
2. No

Answer: Yes

The questionnaire No: 62

Are you conducting a survey and or interview?

1. Yes
2. No

Answer: Yes

You have been asked to complete this survey as part of scientific research "*Increasing the livability of open public space during nighttime: the importance of lightning in the waterfront areas*". The study is designed to determine the usage dynamics of the waterfront area. Your responses are entirely voluntary, and you may refuse to complete any part or all of this survey. This survey is designed to be anonymous, meaning that there should be no way to connect your responses with you. Toward that end, please do not sign your name to the survey, or include any information in your responses that makes it easy to identify you. By completing and submitting the survey, you affirm that you are at least 18 years old and that you give your consent to use your answers in this research.

*General information:*

Age:

1. 18-25;
2. 25-40;
3. 40-55;
4. 55+

Answer: 40-55

Gender

1. Female
2. Male

Answer: Male

*PART A: Open space usage:*

**1. Do you use open public space in the waterfront area?**

1. Yes
2. No

Answer: Yes

**2. Time period: When do you use these spaces the most?**

1. in the morning
2. in the afternoon
3. in the evening/during nighttime
4. other: in the morning and in the evening

Answer: 2) in the afternoon

The questionnaire No: 62

*PART B: Nighttime open space usage:*

**3. Frequency: How often do you visit these spaces during nighttime?**

1. very often - every day
2. often - once or twice per week
3. rarely - one or twice per month
4. almost never

Answer: 1) very often - every day

**4. Duration: How much time do you usually spend in these places during nighttime?**

1. more than 1 hour
2. around 30 minutes
3. 10-15 minutes
4. couple of minutes

Answer: 2) around 30 minutes

**5. Activity: What type of activities do you engage in these spaces during nighttime?**

1. leisure and socialization- hanging out with friends or walking the dog
2. recreation - walking, running, cycling, exercise
3. relaxing by myself
4. just passing through
5. Other / walking the dog

Answer: Other: walking the dog

**6. When spending time in open space during nighttime what is the most important spatial feature that influence the position and means of usage?**

1. urban furniture and pedestrian/bicycle paths
2. greenery and water proximity
3. Lightning
4. Other: \_\_\_\_\_

Answer: 2) greenery and water proximity

**7. Are you satisfied with the position and overall quality of artificial lightning in these spaces?**  
(Choose grade from 1 to 5; 1-not at all, 5-very satisfied)

Answer: 4

**8. Do you feel comfortable and safe in these spaces during nighttime?**

1. Yes
2. No

Answer: Yes

The questionnaire No: 63

Are you conducting a survey and or interview?

1. Yes
2. No

Answer: Yes

You have been asked to complete this survey as part of scientific research "*Increasing the livability of open public space during nighttime: the importance of lightning in the waterfront areas*". The study is designed to determine the usage dynamics of the waterfront area. Your responses are entirely voluntary, and you may refuse to complete any part or all of this survey. This survey is designed to be anonymous, meaning that there should be no way to connect your responses with you. Toward that end, please do not sign your name to the survey, or include any information in your responses that makes it easy to identify you. By completing and submitting the survey, you affirm that you are at least 18 years old and that you give your consent to use your answers in this research.

*General information:*

Age:

1. 18-25;
2. 25-40;
3. 40-55;
4. 55+

Answer: 25-40

Gender

1. Female
2. Male

Answer: Female

*PART A: Open space usage:*

**1. Do you use open public space in the waterfront area?**

1. Yes
2. No

Answer: Yes

**2. Time period: When do you use these spaces the most?**

1. in the morning
2. in the afternoon
3. in the evening/during nighttime
4. other: in the morning and in the evening

Answer: 2) in the afternoon

The questionnaire No: 63

*PART B: Nighttime open space usage:*

**3. Frequency: How often do you visit these spaces during nighttime?**

1. very often - every day
2. often - once or twice per week
3. rarely - one or twice per month
4. almost never

Answer: 4) almost never

**4. Duration: How much time do you usually spend in these places during nighttime?**

1. more than 1 hour
2. around 30 minutes
3. 10-15 minutes
4. couple of minutes

Answer: 2) around 30 minutes

**5. Activity: What type of activities do you engage in these spaces during nighttime?**

1. leisure and socialization- hanging out with friends or walking the dog
2. recreation - walking, running, cycling, exercise
3. relaxing by myself
4. just passing through
5. Other / walking the dog

Answer: 1) leisure and socialization- hangingt out with friends or walking the dog

**6. When spending time in open space during nighttime what is the most important spatial feature that influence the position and means of usage?**

1. urban furniture and pedestrian/bicycle paths
2. greenery and water proximity
3. Lightning
4. Other: \_\_\_\_\_

Answer: 2) greenery and water proximity

**7. Are you satisfied with the position and overall quality of artificial lightning in these spaces?**

(Choose grade from 1 to 5; 1-not at all, 5-very satisfied)

Answer: 3

**8. Do you feel comfortable and safe in these spaces during nighttime?**

1. Yes
2. No

Answer: No

The questionnaire No: 64

Are you conducting a survey and or interview?

1. Yes
2. No

Answer: Yes

You have been asked to complete this survey as part of scientific research "*Increasing the livability of open public space during nighttime: the importance of lightning in the waterfront areas*". The study is designed to determine the usage dynamics of the waterfront area. Your responses are entirely voluntary, and you may refuse to complete any part or all of this survey. This survey is designed to be anonymous, meaning that there should be no way to connect your responses with you. Toward that end, please do not sign your name to the survey, or include any information in your responses that makes it easy to identify you. By completing and submitting the survey, you affirm that you are at least 18 years old and that you give your consent to use your answers in this research.

*General information:*

Age:

1. 18-25;
2. 25-40;
3. 40-55;
4. 55+

Answer: 25-40

Gender

1. Female
2. Male

Answer: Female

*PART A: Open space usage:*

**1. Do you use open public space in the waterfront area?**

1. Yes
2. No

Answer: Yes

**2. Time period: When do you use these spaces the most?**

1. in the morning
2. in the afternoon
3. in the evening/during nighttime
4. other: in the morning and in the evening

Answer: 2) in the afternoon

The questionnaire No: 64

*PART B: Nighttime open space usage:*

**3. Frequency: How often do you visit these spaces during nighttime?**

1. very often - every day
2. often - once or twice per week
3. rarely - one or twice per month
4. almost never

Answer: 3) rarely - one or twice per month

**4. Duration: How much time do you usually spend in these places during nighttime?**

1. more than 1 hour
2. around 30 minutes
3. 10-15 minutes
4. couple of minutes

Answer: 2) around 30 minutes

**5. Activity: What type of activities do you engage in these spaces during nighttime?**

1. leisure and socialization- hanging out with friends or walking the dog
2. recreation - walking, running, cycling, exercise
3. relaxing by myself
4. just passing through
5. Other / walking the dog

Answer: 1) leisure and socialization- hangingt out with friends or walking the dog

**6. When spending time in open space during nighttime what is the most important spatial feature that influence the position and means of usage?**

1. urban furniture and pedestrian/bicycle paths
2. greenery and water proximity
3. Lightning
4. Other: \_\_\_\_\_

Answer: 3) Lightning

**7. Are you satisfied with the position and overall quality of artificial lightning in these spaces?**

(Choose grade from 1 to 5; 1-not at all, 5-very satisfied)

Answer: 4

**8. Do you feel comfortable and safe in these spaces during nighttime?**

1. Yes
2. No

Answer: No

The questionnaire No: 65

Are you conducting a survey and or interview?

1. Yes
2. No

Answer: Yes

You have been asked to complete this survey as part of scientific research "*Increasing the livability of open public space during nighttime: the importance of lightning in the waterfront areas*". The study is designed to determine the usage dynamics of the waterfront area. Your responses are entirely voluntary, and you may refuse to complete any part or all of this survey. This survey is designed to be anonymous, meaning that there should be no way to connect your responses with you. Toward that end, please do not sign your name to the survey, or include any information in your responses that makes it easy to identify you. By completing and submitting the survey, you affirm that you are at least 18 years old and that you give your consent to use your answers in this research.

*General information:*

Age:

1. 18-25;
2. 25-40;
3. 40-55;
4. 55+

Answer: 18-25

Gender

1. Female
2. Male

Answer: Male

*PART A: Open space usage:*

**1. Do you use open public space in the waterfront area?**

1. Yes
2. No

Answer: Yes

**2. Time period: When do you use these spaces the most?**

1. in the morning
2. in the afternoon
3. in the evening/during nighttime
4. other: in the morning and in the evening

Answer: 3) in the evening/during nighttime

The questionnaire No: 65

*PART B: Nighttime open space usage:*

**3. Frequency: How often do you visit these spaces during nighttime?**

1. very often - every day
2. often - once or twice per week
3. rarely - one or twice per month
4. almost never

Answer: 2) often - once or twice per week

**4. Duration: How much time do you usually spend in these places during nighttime?**

1. more than 1 hour
2. around 30 minutes
3. 10-15 minutes
4. couple of minutes

Answer: 1) more than 1 hour

**5. Activity: What type of activities do you engage in these spaces during nighttime?**

1. leisure and socialization- hanging out with friends or walking the dog
2. recreation - walking, running, cycling, exercise
3. relaxing by myself
4. just passing through
5. Other / walking the dog

Answer: 2) recreation - walking, running, cycling, exercise

**6. When spending time in open space during nighttime what is the most important spatial feature that influence the position and means of usage?**

1. urban furniture and pedestrian/bicycle paths
2. greenery and water proximity
3. Lightning
4. Other: \_\_\_\_\_

Answer: Other: river restaurants

**7. Are you satisfied with the position and overall quality of artificial lightning in these spaces?**  
(Choose grade from 1 to 5; 1-not at all, 5-very satisfied)

Answer: 2

**8. Do you feel comfortable and safe in these spaces during nighttime?**

1. Yes
2. No

Answer: No

The questionnaire No: 66

Are you conducting a survey and or interview?

1. Yes
2. No

Answer: Yes

You have been asked to complete this survey as part of scientific research "*Increasing the livability of open public space during nighttime: the importance of lightning in the waterfront areas*". The study is designed to determine the usage dynamics of the waterfront area. Your responses are entirely voluntary, and you may refuse to complete any part or all of this survey. This survey is designed to be anonymous, meaning that there should be no way to connect your responses with you. Toward that end, please do not sign your name to the survey, or include any information in your responses that makes it easy to identify you. By completing and submitting the survey, you affirm that you are at least 18 years old and that you give your consent to use your answers in this research.

*General information:*

Age:

1. 18-25;
2. 25-40;
3. 40-55;
4. 55+

Answer: 40-55

Gender

1. Female
2. Male

Answer: Male

*PART A: Open space usage:*

**1. Do you use open public space in the waterfront area?**

1. Yes
2. No

Answer: Yes

**2. Time period: When do you use these spaces the most?**

1. in the morning
2. in the afternoon
3. in the evening/during nighttime
4. other: in the morning and in the evening

Answer: 3) in the evening/during nighttime

The questionnaire No: 66

*PART B: Nighttime open space usage:*

**3. Frequency: How often do you visit these spaces during nighttime?**

1. very often - every day
2. often - once or twice per week
3. rarely - one or twice per month
4. almost never

Answer: 2) often - once or twice per week

**4. Duration: How much time do you usually spend in these places during nighttime?**

1. more than 1 hour
2. around 30 minutes
3. 10-15 minutes
4. couple of minutes

Answer: 1) more than 1 hour

**5. Activity: What type of activities do you engage in these spaces during nighttime?**

1. leisure and socialization- hanging out with friends or walking the dog
2. recreation - walking, running, cycling, exercise
3. relaxing by myself
4. just passing through
5. Other / walking the dog

Answer: 4) just passing through

**6. When spending time in open space during nighttime what is the most important spatial feature that influence the position and means of usage?**

1. urban furniture and pedestrian/bicycle paths
2. greenery and water proximity
3. Lightning
4. Other: \_\_\_\_\_

Answer: 3) Lightning

**7. Are you satisfied with the position and overall quality of artificial lightning in these spaces?**  
(Choose grade from 1 to 5; 1-not at all, 5-very satisfied)

Answer: 3

**8. Do you feel comfortable and safe in these spaces during nighttime?**

1. Yes
2. No

Answer: Yes

The questionnaire No: 67

Are you conducting a survey and or interview?

1. Yes
2. No

Answer: Yes

You have been asked to complete this survey as part of scientific research "*Increasing the livability of open public space during nighttime: the importance of lightning in the waterfront areas*". The study is designed to determine the usage dynamics of the waterfront area. Your responses are entirely voluntary, and you may refuse to complete any part or all of this survey. This survey is designed to be anonymous, meaning that there should be no way to connect your responses with you. Toward that end, please do not sign your name to the survey, or include any information in your responses that makes it easy to identify you. By completing and submitting the survey, you affirm that you are at least 18 years old and that you give your consent to use your answers in this research.

*General information:*

Age:

1. 18-25;
2. 25-40;
3. 40-55;
4. 55+

Answer: 25-40

Gender

1. Female
2. Male

Answer: Female

*PART A: Open space usage:*

**1. Do you use open public space in the waterfront area?**

1. Yes
2. No

Answer: Yes

**2. Time period: When do you use these spaces the most?**

1. in the morning
2. in the afternoon
3. in the evening/during nighttime
4. other: in the morning and in the evening

Answer: 3) in the evening/during nighttime

The questionnaire No: 67

*PART B: Nighttime open space usage:*

**3. Frequency: How often do you visit these spaces during nighttime?**

1. very often - every day
2. often - once or twice per week
3. rarely - one or twice per month
4. almost never

Answer: 2) often - once or twice per week

**4. Duration: How much time do you usually spend in these places during nighttime?**

1. more than 1 hour
2. around 30 minutes
3. 10-15 minutes
4. couple of minutes

Answer: 1) more than 1 hour

**5. Activity: What type of activities do you engage in these spaces during nighttime?**

1. leisure and socialization- hanging out with friends or walking the dog
2. recreation - walking, running, cycling, exercise
3. relaxing by myself
4. just passing through
5. Other / walking the dog

Answer: 3) relaxing by myself

**6. When spending time in open space during nighttime what is the most important spatial feature that influence the position and means of usage?**

1. urban furniture and pedestrian/bicycle paths
2. greenery and water proximity
3. Lightning
4. Other: \_\_\_\_\_

Answer: 1) urban furniture and pedestrian/bicycle paths

**7. Are you satisfied with the position and overall quality of artificial lightning in these spaces?**  
(Choose grade from 1 to 5; 1-not at all, 5-very satisfied)

Answer: 2

**8. Do you feel comfortable and safe in these spaces during nighttime?**

1. Yes
2. No

Answer: Yes

The questionnaire No: 68

Are you conducting a survey and or interview?

1. Yes
2. No

Answer: Yes

You have been asked to complete this survey as part of scientific research "*Increasing the livability of open public space during nighttime: the importance of lightning in the waterfront areas*". The study is designed to determine the usage dynamics of the waterfront area. Your responses are entirely voluntary, and you may refuse to complete any part or all of this survey. This survey is designed to be anonymous, meaning that there should be no way to connect your responses with you. Toward that end, please do not sign your name to the survey, or include any information in your responses that makes it easy to identify you. By completing and submitting the survey, you affirm that you are at least 18 years old and that you give your consent to use your answers in this research.

*General information:*

Age:

1. 18-25;
2. 25-40;
3. 40-55;
4. 55+

Answer: 18-25

Gender

1. Female
2. Male

Answer: Female

*PART A: Open space usage:*

**1. Do you use open public space in the waterfront area?**

1. Yes
2. No

Answer: No

**2. Time period: When do you use these spaces the most?**

1. in the morning
2. in the afternoon
3. in the evening/during nighttime
4. other: in the morning and in the evening

Answer: 1) in the morning

The questionnaire No: 68

*PART B: Nighttime open space usage:*

**3. Frequency: How often do you visit these spaces during nighttime?**

1. very often - every day
2. often - once or twice per week
3. rarely - one or twice per month
4. almost never

Answer: 4) almost never

**4. Duration: How much time do you usually spend in these places during nighttime?**

1. more than 1 hour
2. around 30 minutes
3. 10-15 minutes
4. couple of minutes

Answer: 4) couple of minutes

**5. Activity: What type of activities do you engage in these spaces during nighttime?**

1. leisure and socialization- hanging out with friends or walking the dog
2. recreation - walking, running, cycling, exercise
3. relaxing by myself
4. just passing through
5. Other / walking the dog

Answer: 2) recreation - walking, running, cycling, exercise

**6. When spending time in open space during nighttime what is the most important spatial feature that influence the position and means of usage?**

1. urban furniture and pedestrian/bicycle paths
2. greenery and water proximity
3. Lightning
4. Other: \_\_\_\_\_

Answer: 2) greenery and water proximity

**7. Are you satisfied with the position and overall quality of artificial lightning in these spaces?**  
(Choose grade from 1 to 5; 1-not at all, 5-very satisfied)

Answer: 5

**8. Do you feel comfortable and safe in these spaces during nighttime?**

1. Yes
2. No

Answer: No

The questionnaire No: 69

Are you conducting a survey and or interview?

1. Yes
2. No

Answer: Yes

You have been asked to complete this survey as part of scientific research "*Increasing the livability of open public space during nighttime: the importance of lightning in the waterfront areas*". The study is designed to determine the usage dynamics of the waterfront area. Your responses are entirely voluntary, and you may refuse to complete any part or all of this survey. This survey is designed to be anonymous, meaning that there should be no way to connect your responses with you. Toward that end, please do not sign your name to the survey, or include any information in your responses that makes it easy to identify you. By completing and submitting the survey, you affirm that you are at least 18 years old and that you give your consent to use your answers in this research.

*General information:*

Age:

1. 18-25;
2. 25-40;
3. 40-55;
4. 55+

Answer: 18-25

Gender

1. Female
2. Male

Answer: Male

*PART A: Open space usage:*

**1. Do you use open public space in the waterfront area?**

1. Yes
2. No

Answer: Yes

**2. Time period: When do you use these spaces the most?**

1. in the morning
2. in the afternoon
3. in the evening/during nighttime
4. other: in the morning and in the evening

Answer: 2) in the afternoon

The questionnaire No: 69

*PART B: Nighttime open space usage:*

**3. Frequency: How often do you visit these spaces during nighttime?**

1. very often - every day
2. often - once or twice per week
3. rarely - one or twice per month
4. almost never

Answer: 4) almost never

**4. Duration: How much time do you usually spend in these places during nighttime?**

1. more than 1 hour
2. around 30 minutes
3. 10-15 minutes
4. couple of minutes

Answer: 2) around 30 minutes

**5. Activity: What type of activities do you engage in these spaces during nighttime?**

1. leisure and socialization- hanging out with friends or walking the dog
2. recreation - walking, running, cycling, exercise
3. relaxing by myself
4. just passing through
5. Other / walking the dog

Answer: 4) just passing through

**6. When spending time in open space during nighttime what is the most important spatial feature that influence the position and means of usage?**

1. urban furniture and pedestrian/bicycle paths
2. greenery and water proximity
3. Lightning
4. Other: \_\_\_\_\_

Answer: Other: river restaurants

**7. Are you satisfied with the position and overall quality of artificial lightning in these spaces?**  
(Choose grade from 1 to 5; 1-not at all, 5-very satisfied)

Answer: 2

**8. Do you feel comfortable and safe in these spaces during nighttime?**

1. Yes
2. No

Answer: No

## The questionnaire No: 70

Are you conducting a survey and or interview?

1. Yes
2. No

Answer: Yes

You have been asked to complete this survey as part of scientific research "*Increasing the livability of open public space during nighttime: the importance of lightning in the waterfront areas*". The study is designed to determine the usage dynamics of the waterfront area. Your responses are entirely voluntary, and you may refuse to complete any part or all of this survey. This survey is designed to be anonymous, meaning that there should be no way to connect your responses with you. Toward that end, please do not sign your name to the survey, or include any information in your responses that makes it easy to identify you. By completing and submitting the survey, you affirm that you are at least 18 years old and that you give your consent to use your answers in this research.

*General information:*

Age:

1. 18-25;
2. 25-40;
3. 40-55;
4. 55+

Answer: 25-40

Gender

1. Female
2. Male

Answer: Male

*PART A: Open space usage:*

**1. Do you use open public space in the waterfront area?**

1. Yes
2. No

Answer: Yes

**2. Time period: When do you use these spaces the most?**

1. in the morning
2. in the afternoon
3. in the evening/during nighttime
4. other: in the morning and in the evening

Answer: 1) in the morning

The questionnaire No: 70

*PART B: Nighttime open space usage:*

**3. Frequency: How often do you visit these spaces during nighttime?**

1. very often - every day
2. often - once or twice per week
3. rarely - one or twice per month
4. almost never

Answer: 2) often - once or twice per week

**4. Duration: How much time do you usually spend in these places during nighttime?**

1. more than 1 hour
2. around 30 minutes
3. 10-15 minutes
4. couple of minutes

Answer: 2) around 30 minutes

**5. Activity: What type of activities do you engage in these spaces during nighttime?**

1. leisure and socialization- hanging out with friends or walking the dog
2. recreation - walking, running, cycling, exercise
3. relaxing by myself
4. just passing through
5. Other / walking the dog

Answer: 1) leisure and socialization- hangingt out with friends or walking the dog

**6. When spending time in open space during nighttime what is the most important spatial feature that influence the position and means of usage?**

1. urban furniture and pedestrian/bicycle paths
2. greenery and water proximity
3. Lightning
4. Other: \_\_\_\_\_

Answer: 3) Lightning

**7. Are you satisfied with the position and overall quality of artificial lightning in these spaces?**

(Choose grade from 1 to 5; 1-not at all, 5-very satisfied)

Answer: 3

**8. Do you feel comfortable and safe in these spaces during nighttime?**

1. Yes
2. No

Answer: No

The questionnaire No: 71

Are you conducting a survey and or interview?

1. Yes
2. No

Answer: Yes

You have been asked to complete this survey as part of scientific research "*Increasing the livability of open public space during nighttime: the importance of lightning in the waterfront areas*". The study is designed to determine the usage dynamics of the waterfront area. Your responses are entirely voluntary, and you may refuse to complete any part or all of this survey. This survey is designed to be anonymous, meaning that there should be no way to connect your responses with you. Toward that end, please do not sign your name to the survey, or include any information in your responses that makes it easy to identify you. By completing and submitting the survey, you affirm that you are at least 18 years old and that you give your consent to use your answers in this research.

*General information:*

Age:

1. 18-25;
2. 25-40;
3. 40-55;
4. 55+

Answer: 18-25

Gender

1. Female
2. Male

Answer: Male

*PART A: Open space usage:*

**1. Do you use open public space in the waterfront area?**

1. Yes
2. No

Answer: Yes

**2. Time period: When do you use these spaces the most?**

1. in the morning
2. in the afternoon
3. in the evening/during nighttime
4. other: in the morning and in the evening

Answer: 3) in the evening/during nighttime

The questionnaire No: 71

*PART B: Nighttime open space usage:*

**3. Frequency: How often do you visit these spaces during nighttime?**

1. very often - every day
2. often - once or twice per week
3. rarely - one or twice per month
4. almost never

Answer: 3) rarely - one or twice per month

**4. Duration: How much time do you usually spend in these places during nighttime?**

1. more than 1 hour
2. around 30 minutes
3. 10-15 minutes
4. couple of minutes

Answer: 4) couple of minutes

**5. Activity: What type of activities do you engage in these spaces during nighttime?**

1. leisure and socialization- hanging out with friends or walking the dog
2. recreation - walking, running, cycling, exercise
3. relaxing by myself
4. just passing through
5. Other / walking the dog

Answer: 2) recreation - walking, running, cycling, exercise

**6. When spending time in open space during nighttime what is the most important spatial feature that influence the position and means of usage?**

1. urban furniture and pedestrian/bicycle paths
2. greenery and water proximity
3. Lightning
4. Other: \_\_\_\_\_

Answer: 2) greenery and water proximity

**7. Are you satisfied with the position and overall quality of artificial lightning in these spaces?**  
(Choose grade from 1 to 5; 1-not at all, 5-very satisfied)

Answer: 3

**8. Do you feel comfortable and safe in these spaces during nighttime?**

1. Yes
2. No

Answer: No

The questionnaire No: 72

Are you conducting a survey and or interview?

1. Yes
2. No

Answer: Yes

You have been asked to complete this survey as part of scientific research "*Increasing the livability of open public space during nighttime: the importance of lightning in the waterfront areas*". The study is designed to determine the usage dynamics of the waterfront area. Your responses are entirely voluntary, and you may refuse to complete any part or all of this survey. This survey is designed to be anonymous, meaning that there should be no way to connect your responses with you. Toward that end, please do not sign your name to the survey, or include any information in your responses that makes it easy to identify you. By completing and submitting the survey, you affirm that you are at least 18 years old and that you give your consent to use your answers in this research.

*General information:*

Age:

1. 18-25;
2. 25-40;
3. 40-55;
4. 55+

Answer: 25-40

Gender

1. Female
2. Male

Answer: Female

*PART A: Open space usage:*

**1. Do you use open public space in the waterfront area?**

1. Yes
2. No

Answer: Yes

**2. Time period: When do you use these spaces the most?**

1. in the morning
2. in the afternoon
3. in the evening/during nighttime
4. other: in the morning and in the evening

Answer: 1) in the morning

The questionnaire No: 72

*PART B: Nighttime open space usage:*

**3. Frequency: How often do you visit these spaces during nighttime?**

1. very often - every day
2. often - once or twice per week
3. rarely - one or twice per month
4. almost never

Answer: 1) very often - every day

**4. Duration: How much time do you usually spend in these places during nighttime?**

1. more than 1 hour
2. around 30 minutes
3. 10-15 minutes
4. couple of minutes

Answer: 1) more than 1 hour

**5. Activity: What type of activities do you engage in these spaces during nighttime?**

1. leisure and socialization- hanging out with friends or walking the dog
2. recreation - walking, running, cycling, exercise
3. relaxing by myself
4. just passing through
5. Other / walking the dog

Answer: 4) just passing through

**6. When spending time in open space during nighttime what is the most important spatial feature that influence the position and means of usage?**

1. urban furniture and pedestrian/bicycle paths
2. greenery and water proximity
3. Lightning
4. Other: \_\_\_\_\_

Answer: Other: river restaurants

**7. Are you satisfied with the position and overall quality of artificial lightning in these spaces?**  
(Choose grade from 1 to 5; 1-not at all, 5-very satisfied)

Answer: 2

**8. Do you feel comfortable and safe in these spaces during nighttime?**

1. Yes
2. No

Answer: No

### The questionnaire No: 73

Are you conducting a survey and or interview?

1. Yes
2. No

Answer: Yes

You have been asked to complete this survey as part of scientific research "*Increasing the livability of open public space during nighttime: the importance of lightning in the waterfront areas*". The study is designed to determine the usage dynamics of the waterfront area. Your responses are entirely voluntary, and you may refuse to complete any part or all of this survey. This survey is designed to be anonymous, meaning that there should be no way to connect your responses with you. Toward that end, please do not sign your name to the survey, or include any information in your responses that makes it easy to identify you. By completing and submitting the survey, you affirm that you are at least 18 years old and that you give your consent to use your answers in this research.

*General information:*

Age:

1. 18-25;
2. 25-40;
3. 40-55;
4. 55+

Answer: 25-40

Gender

1. Female
2. Male

Answer: Female

*PART A: Open space usage:*

**1. Do you use open public space in the waterfront area?**

1. Yes
2. No

Answer: Yes

**2. Time period: When do you use these spaces the most?**

1. in the morning
2. in the afternoon
3. in the evening/during nighttime
4. other: in the morning and in the evening

Answer: 1) in the morning

The questionnaire No: 73

*PART B: Nighttime open space usage:*

**3. Frequency: How often do you visit these spaces during nighttime?**

1. very often - every day
2. often - once or twice per week
3. rarely - one or twice per month
4. almost never

Answer: 4) almost never

**4. Duration: How much time do you usually spend in these places during nighttime?**

1. more than 1 hour
2. around 30 minutes
3. 10-15 minutes
4. couple of minutes

Answer: 4) couple of minutes

**5. Activity: What type of activities do you engage in these spaces during nighttime?**

1. leisure and socialization- hanging out with friends or walking the dog
2. recreation - walking, running, cycling, exercise
3. relaxing by myself
4. just passing through
5. Other / walking the dog

Answer: 4) just passing through

**6. When spending time in open space during nighttime what is the most important spatial feature that influence the position and means of usage?**

1. urban furniture and pedestrian/bicycle paths
2. greenery and water proximity
3. Lightning
4. Other: \_\_\_\_\_

Answer: 1) urban furniture and pedestrian/bicycle paths

**7. Are you satisfied with the position and overall quality of artificial lightning in these spaces?**  
(Choose grade from 1 to 5; 1-not at all, 5-very satisfied)

Answer: 3

**8. Do you feel comfortable and safe in these spaces during nighttime?**

1. Yes
2. No

Answer: Yes

The questionnaire No: 74

Are you conducting a survey and or interview?

1. Yes
2. No

Answer: Yes

You have been asked to complete this survey as part of scientific research "*Increasing the livability of open public space during nighttime: the importance of lightning in the waterfront areas*". The study is designed to determine the usage dynamics of the waterfront area. Your responses are entirely voluntary, and you may refuse to complete any part or all of this survey. This survey is designed to be anonymous, meaning that there should be no way to connect your responses with you. Toward that end, please do not sign your name to the survey, or include any information in your responses that makes it easy to identify you. By completing and submitting the survey, you affirm that you are at least 18 years old and that you give your consent to use your answers in this research.

*General information:*

Age:

1. 18-25;
2. 25-40;
3. 40-55;
4. 55+

Answer: 40-55

Gender

1. Female
2. Male

Answer: Female

*PART A: Open space usage:*

**1. Do you use open public space in the waterfront area?**

1. Yes
2. No

Answer: Yes

**2. Time period: When do you use these spaces the most?**

1. in the morning
2. in the afternoon
3. in the evening/during nighttime
4. other: in the morning and in the evening

Answer: 2) in the afternoon

The questionnaire No: 74

*PART B: Nighttime open space usage:*

**3. Frequency: How often do you visit these spaces during nighttime?**

1. very often - every day
2. often - once or twice per week
3. rarely - one or twice per month
4. almost never

Answer: 1) very often - every day

**4. Duration: How much time do you usually spend in these places during nighttime?**

1. more than 1 hour
2. around 30 minutes
3. 10-15 minutes
4. couple of minutes

Answer: 3) 10-15 minutes

**5. Activity: What type of activities do you engage in these spaces during nighttime?**

1. leisure and socialization- hanging out with friends or walking the dog
2. recreation - walking, running, cycling, exercise
3. relaxing by myself
4. just passing through
5. Other / walking the dog

Answer: 3) relaxing by myself

**6. When spending time in open space during nighttime what is the most important spatial feature that influence the position and means of usage?**

1. urban furniture and pedestrian/bicycle paths
2. greenery and water proximity
3. Lightning
4. Other: \_\_\_\_\_

Answer: 2) greenery and water proximity

**7. Are you satisfied with the position and overall quality of artificial lightning in these spaces?**  
(Choose grade from 1 to 5; 1-not at all, 5-very satisfied)

Answer: 3

**8. Do you feel comfortable and safe in these spaces during nighttime?**

1. Yes
2. No

Answer: No

The questionnaire No: 75

Are you conducting a survey and or interview?

1. Yes
2. No

Answer: Yes

You have been asked to complete this survey as part of scientific research "*Increasing the livability of open public space during nighttime: the importance of lightning in the waterfront areas*". The study is designed to determine the usage dynamics of the waterfront area. Your responses are entirely voluntary, and you may refuse to complete any part or all of this survey. This survey is designed to be anonymous, meaning that there should be no way to connect your responses with you. Toward that end, please do not sign your name to the survey, or include any information in your responses that makes it easy to identify you. By completing and submitting the survey, you affirm that you are at least 18 years old and that you give your consent to use your answers in this research.

*General information:*

Age:

1. 18-25;
2. 25-40;
3. 40-55;
4. 55+

Answer: 18-25

Gender

1. Female
2. Male

Answer: Male

*PART A: Open space usage:*

**1. Do you use open public space in the waterfront area?**

1. Yes
2. No

Answer: No

**2. Time period: When do you use these spaces the most?**

1. in the morning
2. in the afternoon
3. in the evening/during nighttime
4. other: in the morning and in the evening

Answer: 2) in the afternoon

The questionnaire No: 75

*PART B: Nighttime open space usage:*

**3. Frequency: How often do you visit these spaces during nighttime?**

1. very often - every day
2. often - once or twice per week
3. rarely - one or twice per month
4. almost never

Answer: 2) often - once or twice per week

**4. Duration: How much time do you usually spend in these places during nighttime?**

1. more than 1 hour
2. around 30 minutes
3. 10-15 minutes
4. couple of minutes

Answer: 2) around 30 minutes

**5. Activity: What type of activities do you engage in these spaces during nighttime?**

1. leisure and socialization- hanging out with friends or walking the dog
2. recreation - walking, running, cycling, exercise
3. relaxing by myself
4. just passing through
5. Other / walking the dog

Answer: 3) relaxing by myself

**6. When spending time in open space during nighttime what is the most important spatial feature that influence the position and means of usage?**

1. urban furniture and pedestrian/bicycle paths
2. greenery and water proximity
3. Lightning
4. Other: \_\_\_\_\_

Answer: 3) Lightning

**7. Are you satisfied with the position and overall quality of artificial lightning in these spaces?**  
(Choose grade from 1 to 5; 1-not at all, 5-very satisfied)

Answer: 1

**8. Do you feel comfortable and safe in these spaces during nighttime?**

1. Yes
2. No

Answer: No

The questionnaire No: 76

Are you conducting a survey and or interview?

1. Yes
2. No

Answer: Yes

You have been asked to complete this survey as part of scientific research "*Increasing the livability of open public space during nighttime: the importance of lightning in the waterfront areas*". The study is designed to determine the usage dynamics of the waterfront area. Your responses are entirely voluntary, and you may refuse to complete any part or all of this survey. This survey is designed to be anonymous, meaning that there should be no way to connect your responses with you. Toward that end, please do not sign your name to the survey, or include any information in your responses that makes it easy to identify you. By completing and submitting the survey, you affirm that you are at least 18 years old and that you give your consent to use your answers in this research.

*General information:*

Age:

1. 18-25;
2. 25-40;
3. 40-55;
4. 55+

Answer: 18-25

Gender

1. Female
2. Male

Answer: Male

*PART A: Open space usage:*

**1. Do you use open public space in the waterfront area?**

1. Yes
2. No

Answer: Yes

**2. Time period: When do you use these spaces the most?**

1. in the morning
2. in the afternoon
3. in the evening/during nighttime
4. other: in the morning and in the evening

Answer: 1) in the morning

The questionnaire No: 76

*PART B: Nighttime open space usage:*

**3. Frequency: How often do you visit these spaces during nighttime?**

1. very often - every day
2. often - once or twice per week
3. rarely - one or twice per month
4. almost never

Answer: 2) often - once or twice per week

**4. Duration: How much time do you usually spend in these places during nighttime?**

1. more than 1 hour
2. around 30 minutes
3. 10-15 minutes
4. couple of minutes

Answer: 2) around 30 minutes

**5. Activity: What type of activities do you engage in these spaces during nighttime?**

1. leisure and socialization- hanging out with friends or walking the dog
2. recreation - walking, running, cycling, exercise
3. relaxing by myself
4. just passing through
5. Other / walking the dog

Answer: 2) recreation - walking, running, cycling, exercise

**6. When spending time in open space during nighttime what is the most important spatial feature that influence the position and means of usage?**

1. urban furniture and pedestrian/bicycle paths
2. greenery and water proximity
3. Lightning
4. Other: \_\_\_\_\_

Answer: Other: river restaurants

**7. Are you satisfied with the position and overall quality of artificial lightning in these spaces?**  
(Choose grade from 1 to 5; 1-not at all, 5-very satisfied)

Answer: 3

**8. Do you feel comfortable and safe in these spaces during nighttime?**

1. Yes
2. No

Answer: Yes

The questionnaire No: 77

Are you conducting a survey and or interview?

1. Yes
2. No

Answer: Yes

You have been asked to complete this survey as part of scientific research "*Increasing the livability of open public space during nighttime: the importance of lightning in the waterfront areas*". The study is designed to determine the usage dynamics of the waterfront area. Your responses are entirely voluntary, and you may refuse to complete any part or all of this survey. This survey is designed to be anonymous, meaning that there should be no way to connect your responses with you. Toward that end, please do not sign your name to the survey, or include any information in your responses that makes it easy to identify you. By completing and submitting the survey, you affirm that you are at least 18 years old and that you give your consent to use your answers in this research.

*General information:*

Age:

1. 18-25;
2. 25-40;
3. 40-55;
4. 55+

Answer: 25-40

Gender

1. Female
2. Male

Answer: Male

*PART A: Open space usage:*

**1. Do you use open public space in the waterfront area?**

1. Yes
2. No

Answer: Yes

**2. Time period: When do you use these spaces the most?**

1. in the morning
2. in the afternoon
3. in the evening/during nighttime
4. other: in the morning and in the evening

Answer: 3) in the evening/during nighttime

The questionnaire No: 77

*PART B: Nighttime open space usage:*

**3. Frequency: How often do you visit these spaces during nighttime?**

1. very often - every day
2. often - once or twice per week
3. rarely - one or twice per month
4. almost never

Answer: 3) rarely - one or twice per month

**4. Duration: How much time do you usually spend in these places during nighttime?**

1. more than 1 hour
2. around 30 minutes
3. 10-15 minutes
4. couple of minutes

Answer: 2) around 30 minutes

**5. Activity: What type of activities do you engage in these spaces during nighttime?**

1. leisure and socialization- hanging out with friends or walking the dog
2. recreation - walking, running, cycling, exercise
3. relaxing by myself
4. just passing through
5. Other / walking the dog

Answer: 3) relaxing by myself

**6. When spending time in open space during nighttime what is the most important spatial feature that influence the position and means of usage?**

1. urban furniture and pedestrian/bicycle paths
2. greenery and water proximity
3. Lightning
4. Other: \_\_\_\_\_

Answer: 3) Lightning

**7. Are you satisfied with the position and overall quality of artificial lightning in these spaces?**  
(Choose grade from 1 to 5; 1-not at all, 5-very satisfied)

Answer: 1

**8. Do you feel comfortable and safe in these spaces during nighttime?**

1. Yes
2. No

Answer: Yes

The questionnaire No: 78

Are you conducting a survey and or interview?

1. Yes
2. No

Answer: Yes

You have been asked to complete this survey as part of scientific research "*Increasing the livability of open public space during nighttime: the importance of lightning in the waterfront areas*". The study is designed to determine the usage dynamics of the waterfront area. Your responses are entirely voluntary, and you may refuse to complete any part or all of this survey. This survey is designed to be anonymous, meaning that there should be no way to connect your responses with you. Toward that end, please do not sign your name to the survey, or include any information in your responses that makes it easy to identify you. By completing and submitting the survey, you affirm that you are at least 18 years old and that you give your consent to use your answers in this research.

*General information:*

Age:

1. 18-25;
2. 25-40;
3. 40-55;
4. 55+

Answer: 40-55

Gender

1. Female
2. Male

Answer: Female

*PART A: Open space usage:*

**1. Do you use open public space in the waterfront area?**

1. Yes
2. No

Answer: Yes

**2. Time period: When do you use these spaces the most?**

1. in the morning
2. in the afternoon
3. in the evening/during nighttime
4. other: in the morning and in the evening

Answer: 4) other: in the morning and in the evening

The questionnaire No: 78

*PART B: Nighttime open space usage:*

**3. Frequency: How often do you visit these spaces during nighttime?**

1. very often - every day
2. often - once or twice per week
3. rarely - one or twice per month
4. almost never

Answer: 2) often - once or twice per week

**4. Duration: How much time do you usually spend in these places during nighttime?**

1. more than 1 hour
2. around 30 minutes
3. 10-15 minutes
4. couple of minutes

Answer: 1) more than 1 hour

**5. Activity: What type of activities do you engage in these spaces during nighttime?**

1. leisure and socialization- hanging out with friends or walking the dog
2. recreation - walking, running, cycling, exercise
3. relaxing by myself
4. just passing through
5. Other / walking the dog

Answer: 1) leisure and socialization- hangingt out with friends or walking the dog

**6. When spending time in open space during nighttime what is the most important spatial feature that influence the position and means of usage?**

1. urban furniture and pedestrian/bicycle paths
2. greenery and water proximity
3. Lightning
4. Other: \_\_\_\_\_

Answer: 1) urban furniture and pedestrian/bicycle paths

**7. Are you satisfied with the position and overall quality of artificial lightning in these spaces?**  
(Choose grade from 1 to 5; 1-not at all, 5-very satisfied)

Answer: 3

**8. Do you feel comfortable and safe in these spaces during nighttime?**

1. Yes
2. No

Answer: No

## The questionnaire No: 79

Are you conducting a survey and or interview?

1. Yes
2. No

Answer: Yes

You have been asked to complete this survey as part of scientific research "*Increasing the livability of open public space during nighttime: the importance of lightning in the waterfront areas*". The study is designed to determine the usage dynamics of the waterfront area. Your responses are entirely voluntary, and you may refuse to complete any part or all of this survey. This survey is designed to be anonymous, meaning that there should be no way to connect your responses with you. Toward that end, please do not sign your name to the survey, or include any information in your responses that makes it easy to identify you. By completing and submitting the survey, you affirm that you are at least 18 years old and that you give your consent to use your answers in this research.

### *General information:*

Age:

1. 18-25;
2. 25-40;
3. 40-55;
4. 55+

Answer: 40-55

Gender

1. Female
2. Male

Answer: Male

### *PART A: Open space usage:*

**1. Do you use open public space in the waterfront area?**

1. Yes
2. No

Answer: Yes

**2. Time period: When do you use these spaces the most?**

1. in the morning
2. in the afternoon
3. in the evening/during nighttime
4. other: in the morning and in the evening

Answer: 1) in the morning

The questionnaire No: 79

*PART B: Nighttime open space usage:*

**3. Frequency: How often do you visit these spaces during nighttime?**

1. very often - every day
2. often - once or twice per week
3. rarely - one or twice per month
4. almost never

Answer: 1) very often - every day

**4. Duration: How much time do you usually spend in these places during nighttime?**

1. more than 1 hour
2. around 30 minutes
3. 10-15 minutes
4. couple of minutes

Answer: 3) 10-15 minutes

**5. Activity: What type of activities do you engage in these spaces during nighttime?**

1. leisure and socialization- hanging out with friends or walking the dog
2. recreation - walking, running, cycling, exercise
3. relaxing by myself
4. just passing through
5. Other / walking the dog

Answer: 2) recreation - walking, running, cycling, exercise

**6. When spending time in open space during nighttime what is the most important spatial feature that influence the position and means of usage?**

1. urban furniture and pedestrian/bicycle paths
2. greenery and water proximity
3. Lightning
4. Other: \_\_\_\_\_

Answer: 1) urban furniture and pedestrian/bicycle paths

**7. Are you satisfied with the position and overall quality of artificial lightning in these spaces?**  
(Choose grade from 1 to 5; 1-not at all, 5-very satisfied)

Answer: 4

**8. Do you feel comfortable and safe in these spaces during nighttime?**

1. Yes
2. No

Answer: No

The questionnaire No: 80

Are you conducting a survey and or interview?

1. Yes
2. No

Answer: Yes

You have been asked to complete this survey as part of scientific research "*Increasing the livability of open public space during nighttime: the importance of lightning in the waterfront areas*". The study is designed to determine the usage dynamics of the waterfront area. Your responses are entirely voluntary, and you may refuse to complete any part or all of this survey. This survey is designed to be anonymous, meaning that there should be no way to connect your responses with you. Toward that end, please do not sign your name to the survey, or include any information in your responses that makes it easy to identify you. By completing and submitting the survey, you affirm that you are at least 18 years old and that you give your consent to use your answers in this research.

*General information:*

Age:

1. 18-25;
2. 25-40;
3. 40-55;
4. 55+

Answer: 18-25

Gender

1. Female
2. Male

Answer: Female

*PART A: Open space usage:*

**1. Do you use open public space in the waterfront area?**

1. Yes
2. No

Answer: Yes

**2. Time period: When do you use these spaces the most?**

1. in the morning
2. in the afternoon
3. in the evening/during nighttime
4. other: in the morning and in the evening

Answer: 1) in the morning

The questionnaire No: 80

*PART B: Nighttime open space usage:*

**3. Frequency: How often do you visit these spaces during nighttime?**

1. very often - every day
2. often - once or twice per week
3. rarely - one or twice per month
4. almost never

Answer: 2) often - once or twice per week

**4. Duration: How much time do you usually spend in these places during nighttime?**

1. more than 1 hour
2. around 30 minutes
3. 10-15 minutes
4. couple of minutes

Answer: 4) couple of minutes

**5. Activity: What type of activities do you engage in these spaces during nighttime?**

1. leisure and socialization- hanging out with friends or walking the dog
2. recreation - walking, running, cycling, exercise
3. relaxing by myself
4. just passing through
5. Other / walking the dog

Answer: 3) relaxing by myself

**6. When spending time in open space during nighttime what is the most important spatial feature that influence the position and means of usage?**

1. urban furniture and pedestrian/bicycle paths
2. greenery and water proximity
3. Lightning
4. Other: \_\_\_\_\_

Answer: 3) Lightning

**7. Are you satisfied with the position and overall quality of artificial lightning in these spaces?**  
(Choose grade from 1 to 5; 1-not at all, 5-very satisfied)

Answer: 1

**8. Do you feel comfortable and safe in these spaces during nighttime?**

1. Yes
2. No

Answer: Yes

The questionnaire No: 81

Are you conducting a survey and or interview?

1. Yes
2. No

Answer: Yes

You have been asked to complete this survey as part of scientific research "*Increasing the livability of open public space during nighttime: the importance of lightning in the waterfront areas*". The study is designed to determine the usage dynamics of the waterfront area. Your responses are entirely voluntary, and you may refuse to complete any part or all of this survey. This survey is designed to be anonymous, meaning that there should be no way to connect your responses with you. Toward that end, please do not sign your name to the survey, or include any information in your responses that makes it easy to identify you. By completing and submitting the survey, you affirm that you are at least 18 years old and that you give your consent to use your answers in this research.

*General information:*

Age:

1. 18-25;
2. 25-40;
3. 40-55;
4. 55+

Answer: 25-40

Gender

1. Female
2. Male

Answer: Male

*PART A: Open space usage:*

**1. Do you use open public space in the waterfront area?**

1. Yes
2. No

Answer: Yes

**2. Time period: When do you use these spaces the most?**

1. in the morning
2. in the afternoon
3. in the evening/during nighttime
4. other: in the morning and in the evening

Answer: 4) other: in the morning and in the evening

The questionnaire No: 81

*PART B: Nighttime open space usage:*

**3. Frequency: How often do you visit these spaces during nighttime?**

1. very often - every day
2. often - once or twice per week
3. rarely - one or twice per month
4. almost never

Answer: 2) often - once or twice per week

**4. Duration: How much time do you usually spend in these places during nighttime?**

1. more than 1 hour
2. around 30 minutes
3. 10-15 minutes
4. couple of minutes

Answer: 3) 10-15 minutes

**5. Activity: What type of activities do you engage in these spaces during nighttime?**

1. leisure and socialization- hanging out with friends or walking the dog
2. recreation - walking, running, cycling, exercise
3. relaxing by myself
4. just passing through
5. Other / walking the dog

Answer: 1) leisure and socialization- hangingt out with friends or walking the dog

**6. When spending time in open space during nighttime what is the most important spatial feature that influence the position and means of usage?**

1. urban furniture and pedestrian/bicycle paths
2. greenery and water proximity
3. Lightning
4. Other: \_\_\_\_\_

Answer: 2) greenery and water proximity

**7. Are you satisfied with the position and overall quality of artificial lightning in these spaces?**

(Choose grade from 1 to 5; 1-not at all, 5-very satisfied)

Answer: 1

**8. Do you feel comfortable and safe in these spaces during nighttime?**

1. Yes
2. No

Answer: No

The questionnaire No: 82

Are you conducting a survey and or interview?

1. Yes
2. No

Answer: Yes

You have been asked to complete this survey as part of scientific research "*Increasing the livability of open public space during nighttime: the importance of lightning in the waterfront areas*". The study is designed to determine the usage dynamics of the waterfront area. Your responses are entirely voluntary, and you may refuse to complete any part or all of this survey. This survey is designed to be anonymous, meaning that there should be no way to connect your responses with you. Toward that end, please do not sign your name to the survey, or include any information in your responses that makes it easy to identify you. By completing and submitting the survey, you affirm that you are at least 18 years old and that you give your consent to use your answers in this research.

*General information:*

Age:

1. 18-25;
2. 25-40;
3. 40-55;
4. 55+

Answer: 18-25

Gender

1. Female
2. Male

Answer: Male

*PART A: Open space usage:*

**1. Do you use open public space in the waterfront area?**

1. Yes
2. No

Answer: No

**2. Time period: When do you use these spaces the most?**

1. in the morning
2. in the afternoon
3. in the evening/during nighttime
4. other: in the morning and in the evening

Answer: 1) in the morning

The questionnaire No: 82

*PART B: Nighttime open space usage:*

**3. Frequency: How often do you visit these spaces during nighttime?**

1. very often - every day
2. often - once or twice per week
3. rarely - one or twice per month
4. almost never

Answer: 2) often - once or twice per week

**4. Duration: How much time do you usually spend in these places during nighttime?**

1. more than 1 hour
2. around 30 minutes
3. 10-15 minutes
4. couple of minutes

Answer: 3) 10-15 minutes

**5. Activity: What type of activities do you engage in these spaces during nighttime?**

1. leisure and socialization- hanging out with friends or walking the dog
2. recreation - walking, running, cycling, exercise
3. relaxing by myself
4. just passing through
5. Other / walking the dog

Answer: 1) leisure and socialization- hangingt out with friends or walking the dog

**6. When spending time in open space during nighttime what is the most important spatial feature that influence the position and means of usage?**

1. urban furniture and pedestrian/bicycle paths
2. greenery and water proximity
3. Lightning
4. Other: \_\_\_\_\_

Answer: 2) greenery and water proximity

**7. Are you satisfied with the position and overall quality of artificial lightning in these spaces?**

(Choose grade from 1 to 5; 1-not at all, 5-very satisfied)

Answer: 3

**8. Do you feel comfortable and safe in these spaces during nighttime?**

1. Yes
2. No

Answer: No

The questionnaire No: 83

Are you conducting a survey and or interview?

1. Yes
2. No

Answer: Yes

You have been asked to complete this survey as part of scientific research "*Increasing the livability of open public space during nighttime: the importance of lightning in the waterfront areas*". The study is designed to determine the usage dynamics of the waterfront area. Your responses are entirely voluntary, and you may refuse to complete any part or all of this survey. This survey is designed to be anonymous, meaning that there should be no way to connect your responses with you. Toward that end, please do not sign your name to the survey, or include any information in your responses that makes it easy to identify you. By completing and submitting the survey, you affirm that you are at least 18 years old and that you give your consent to use your answers in this research.

*General information:*

Age:

1. 18-25;
2. 25-40;
3. 40-55;
4. 55+

Answer: 25-40

Gender

1. Female
2. Male

Answer: Female

*PART A: Open space usage:*

**1. Do you use open public space in the waterfront area?**

1. Yes
2. No

Answer: Yes

**2. Time period: When do you use these spaces the most?**

1. in the morning
2. in the afternoon
3. in the evening/during nighttime
4. other: in the morning and in the evening

Answer: 3) in the evening/during nighttime

The questionnaire No: 83

*PART B: Nighttime open space usage:*

**3. Frequency: How often do you visit these spaces during nighttime?**

1. very often - every day
2. often - once or twice per week
3. rarely - one or twice per month
4. almost never

Answer: 3) rarely - one or twice per month

**4. Duration: How much time do you usually spend in these places during nighttime?**

1. more than 1 hour
2. around 30 minutes
3. 10-15 minutes
4. couple of minutes

Answer: 2) around 30 minutes

**5. Activity: What type of activities do you engage in these spaces during nighttime?**

1. leisure and socialization- hanging out with friends or walking the dog
2. recreation - walking, running, cycling, exercise
3. relaxing by myself
4. just passing through
5. Other / walking the dog

Answer: 4) just passing through

**6. When spending time in open space during nighttime what is the most important spatial feature that influence the position and means of usage?**

1. urban furniture and pedestrian/bicycle paths
2. greenery and water proximity
3. Lightning
4. Other: \_\_\_\_\_

Answer: 3) Lightning

**7. Are you satisfied with the position and overall quality of artificial lightning in these spaces?**  
(Choose grade from 1 to 5; 1-not at all, 5-very satisfied)

Answer: 2

**8. Do you feel comfortable and safe in these spaces during nighttime?**

1. Yes
2. No

Answer: Yes

The questionnaire No: 84

Are you conducting a survey and or interview?

1. Yes
2. No

Answer: Yes

You have been asked to complete this survey as part of scientific research "*Increasing the livability of open public space during nighttime: the importance of lightning in the waterfront areas*". The study is designed to determine the usage dynamics of the waterfront area. Your responses are entirely voluntary, and you may refuse to complete any part or all of this survey. This survey is designed to be anonymous, meaning that there should be no way to connect your responses with you. Toward that end, please do not sign your name to the survey, or include any information in your responses that makes it easy to identify you. By completing and submitting the survey, you affirm that you are at least 18 years old and that you give your consent to use your answers in this research.

*General information:*

Age:

1. 18-25;
2. 25-40;
3. 40-55;
4. 55+

Answer: 40-55

Gender

1. Female
2. Male

Answer: Male

*PART A: Open space usage:*

**1. Do you use open public space in the waterfront area?**

1. Yes
2. No

Answer: Yes

**2. Time period: When do you use these spaces the most?**

1. in the morning
2. in the afternoon
3. in the evening/during nighttime
4. other: in the morning and in the evening

Answer: 2) in the afternoon

The questionnaire No: 84

*PART B: Nighttime open space usage:*

**3. Frequency: How often do you visit these spaces during nighttime?**

1. very often - every day
2. often - once or twice per week
3. rarely - one or twice per month
4. almost never

Answer: 3) rarely - one or twice per month

**4. Duration: How much time do you usually spend in these places during nighttime?**

1. more than 1 hour
2. around 30 minutes
3. 10-15 minutes
4. couple of minutes

Answer: 2) around 30 minutes

**5. Activity: What type of activities do you engage in these spaces during nighttime?**

1. leisure and socialization- hanging out with friends or walking the dog
2. recreation - walking, running, cycling, exercise
3. relaxing by myself
4. just passing through
5. Other / walking the dog

Answer: 1) leisure and socialization- hangingt out with friends or walking the dog

**6. When spending time in open space during nighttime what is the most important spatial feature that influence the position and means of usage?**

1. urban furniture and pedestrian/bicycle paths
2. greenery and water proximity
3. Lightning
4. Other: \_\_\_\_\_

Answer: Other: river restaurants

**7. Are you satisfied with the position and overall quality of artificial lightning in these spaces?**  
(Choose grade from 1 to 5; 1-not at all, 5-very satisfied)

Answer: 2

**8. Do you feel comfortable and safe in these spaces during nighttime?**

1. Yes
2. No

Answer: No

The questionnaire No: 85

Are you conducting a survey and or interview?

1. Yes
2. No

Answer: Yes

You have been asked to complete this survey as part of scientific research "*Increasing the livability of open public space during nighttime: the importance of lightning in the waterfront areas*". The study is designed to determine the usage dynamics of the waterfront area. Your responses are entirely voluntary, and you may refuse to complete any part or all of this survey. This survey is designed to be anonymous, meaning that there should be no way to connect your responses with you. Toward that end, please do not sign your name to the survey, or include any information in your responses that makes it easy to identify you. By completing and submitting the survey, you affirm that you are at least 18 years old and that you give your consent to use your answers in this research.

*General information:*

Age:

1. 18-25;
2. 25-40;
3. 40-55;
4. 55+

Answer: 25-40

Gender

1. Female
2. Male

Answer: Male

*PART A: Open space usage:*

**1. Do you use open public space in the waterfront area?**

1. Yes
2. No

Answer: Yes

**2. Time period: When do you use these spaces the most?**

1. in the morning
2. in the afternoon
3. in the evening/during nighttime
4. other: in the morning and in the evening

Answer: 2) in the afternoon

The questionnaire No: 85

*PART B: Nighttime open space usage:*

**3. Frequency: How often do you visit these spaces during nighttime?**

1. very often - every day
2. often - once or twice per week
3. rarely - one or twice per month
4. almost never

Answer: 3) rarely - one or twice per month

**4. Duration: How much time do you usually spend in these places during nighttime?**

1. more than 1 hour
2. around 30 minutes
3. 10-15 minutes
4. couple of minutes

Answer: 2) around 30 minutes

**5. Activity: What type of activities do you engage in these spaces during nighttime?**

1. leisure and socialization- hanging out with friends or walking the dog
2. recreation - walking, running, cycling, exercise
3. relaxing by myself
4. just passing through
5. Other / walking the dog

Answer: 1) leisure and socialization- hangingt out with friends or walking the dog

**6. When spending time in open space during nighttime what is the most important spatial feature that influence the position and means of usage?**

1. urban furniture and pedestrian/bicycle paths
2. greenery and water proximity
3. Lightning
4. Other: \_\_\_\_\_

Answer: 2) greenery and water proximity

**7. Are you satisfied with the position and overall quality of artificial lightning in these spaces?**  
(Choose grade from 1 to 5; 1-not at all, 5-very satisfied)

Answer: 2

**8. Do you feel comfortable and safe in these spaces during nighttime?**

1. Yes
2. No

Answer: No

The questionnaire No: 86

Are you conducting a survey and or interview?

1. Yes
2. No

Answer: Yes

You have been asked to complete this survey as part of scientific research "*Increasing the livability of open public space during nighttime: the importance of lightning in the waterfront areas*". The study is designed to determine the usage dynamics of the waterfront area. Your responses are entirely voluntary, and you may refuse to complete any part or all of this survey. This survey is designed to be anonymous, meaning that there should be no way to connect your responses with you. Toward that end, please do not sign your name to the survey, or include any information in your responses that makes it easy to identify you. By completing and submitting the survey, you affirm that you are at least 18 years old and that you give your consent to use your answers in this research.

*General information:*

Age:

1. 18-25;
2. 25-40;
3. 40-55;
4. 55+

Answer: 18-25

Gender

1. Female
2. Male

Answer: Male

*PART A: Open space usage:*

**1. Do you use open public space in the waterfront area?**

1. Yes
2. No

Answer: Yes

**2. Time period: When do you use these spaces the most?**

1. in the morning
2. in the afternoon
3. in the evening/during nighttime
4. other: in the morning and in the evening

Answer: 3) in the evening/during nighttime

The questionnaire No: 86

*PART B: Nighttime open space usage:*

**3. Frequency: How often do you visit these spaces during nighttime?**

1. very often - every day
2. often - once or twice per week
3. rarely - one or twice per month
4. almost never

Answer: 3) rarely - one or twice per month

**4. Duration: How much time do you usually spend in these places during nighttime?**

1. more than 1 hour
2. around 30 minutes
3. 10-15 minutes
4. couple of minutes

Answer: 2) around 30 minutes

**5. Activity: What type of activities do you engage in these spaces during nighttime?**

1. leisure and socialization- hanging out with friends or walking the dog
2. recreation - walking, running, cycling, exercise
3. relaxing by myself
4. just passing through
5. Other / walking the dog

Answer: 2) recreation - walking, running, cycling, exercise

**6. When spending time in open space during nighttime what is the most important spatial feature that influence the position and means of usage?**

1. urban furniture and pedestrian/bicycle paths
2. greenery and water proximity
3. Lightning
4. Other: \_\_\_\_\_

Answer: 2) greenery and water proximity

**7. Are you satisfied with the position and overall quality of artificial lightning in these spaces?**  
(Choose grade from 1 to 5; 1-not at all, 5-very satisfied)

Answer: 3

**8. Do you feel comfortable and safe in these spaces during nighttime?**

1. Yes
2. No

Answer: No

The questionnaire No: 87

Are you conducting a survey and or interview?

1. Yes
2. No

Answer: Yes

You have been asked to complete this survey as part of scientific research "*Increasing the livability of open public space during nighttime: the importance of lightning in the waterfront areas*". The study is designed to determine the usage dynamics of the waterfront area. Your responses are entirely voluntary, and you may refuse to complete any part or all of this survey. This survey is designed to be anonymous, meaning that there should be no way to connect your responses with you. Toward that end, please do not sign your name to the survey, or include any information in your responses that makes it easy to identify you. By completing and submitting the survey, you affirm that you are at least 18 years old and that you give your consent to use your answers in this research.

*General information:*

Age:

1. 18-25;
2. 25-40;
3. 40-55;
4. 55+

Answer: 55+

Gender

1. Female
2. Male

Answer: Female

*PART A: Open space usage:*

**1. Do you use open public space in the waterfront area?**

1. Yes
2. No

Answer: Yes

**2. Time period: When do you use these spaces the most?**

1. in the morning
2. in the afternoon
3. in the evening/during nighttime
4. other: in the morning and in the evening

Answer: 3) in the evening/during nighttime

The questionnaire No: 87

*PART B: Nighttime open space usage:*

**3. Frequency: How often do you visit these spaces during nighttime?**

1. very often - every day
2. often - once or twice per week
3. rarely - one or twice per month
4. almost never

Answer: 1) very often - every day

**4. Duration: How much time do you usually spend in these places during nighttime?**

1. more than 1 hour
2. around 30 minutes
3. 10-15 minutes
4. couple of minutes

Answer: 1) more than 1 hour

**5. Activity: What type of activities do you engage in these spaces during nighttime?**

1. leisure and socialization- hanging out with friends or walking the dog
2. recreation - walking, running, cycling, exercise
3. relaxing by myself
4. just passing through
5. Other / walking the dog

Answer: 3) relaxing by myself

**6. When spending time in open space during nighttime what is the most important spatial feature that influence the position and means of usage?**

1. urban furniture and pedestrian/bicycle paths
2. greenery and water proximity
3. Lightning
4. Other: \_\_\_\_\_

Answer: 3) Lightning

**7. Are you satisfied with the position and overall quality of artificial lightning in these spaces?**  
(Choose grade from 1 to 5; 1-not at all, 5-very satisfied)

Answer: 4

**8. Do you feel comfortable and safe in these spaces during nighttime?**

1. Yes
2. No

Answer: No

The questionnaire No: 88

Are you conducting a survey and or interview?

1. Yes
2. No

Answer: Yes

You have been asked to complete this survey as part of scientific research "*Increasing the livability of open public space during nighttime: the importance of lightning in the waterfront areas*". The study is designed to determine the usage dynamics of the waterfront area. Your responses are entirely voluntary, and you may refuse to complete any part or all of this survey. This survey is designed to be anonymous, meaning that there should be no way to connect your responses with you. Toward that end, please do not sign your name to the survey, or include any information in your responses that makes it easy to identify you. By completing and submitting the survey, you affirm that you are at least 18 years old and that you give your consent to use your answers in this research.

*General information:*

Age:

1. 18-25;
2. 25-40;
3. 40-55;
4. 55+

Answer: 40-55

Gender

1. Female
2. Male

Answer: Male

*PART A: Open space usage:*

**1. Do you use open public space in the waterfront area?**

1. Yes
2. No

Answer: Yes

**2. Time period: When do you use these spaces the most?**

1. in the morning
2. in the afternoon
3. in the evening/during nighttime
4. other: in the morning and in the evening

Answer: 1) in the morning

The questionnaire No: 88

*PART B: Nighttime open space usage:*

**3. Frequency: How often do you visit these spaces during nighttime?**

1. very often - every day
2. often - once or twice per week
3. rarely - one or twice per month
4. almost never

Answer: 3) rarely - one or twice per month

**4. Duration: How much time do you usually spend in these places during nighttime?**

1. more than 1 hour
2. around 30 minutes
3. 10-15 minutes
4. couple of minutes

Answer: 1) more than 1 hour

**5. Activity: What type of activities do you engage in these spaces during nighttime?**

1. leisure and socialization- hanging out with friends or walking the dog
2. recreation - walking, running, cycling, exercise
3. relaxing by myself
4. just passing through
5. Other / walking the dog

Answer: 2) recreation - walking, running, cycling, exercise

**6. When spending time in open space during nighttime what is the most important spatial feature that influence the position and means of usage?**

1. urban furniture and pedestrian/bicycle paths
2. greenery and water proximity
3. Lightning
4. Other: \_\_\_\_\_

Answer: 2) greenery and water proximity

**7. Are you satisfied with the position and overall quality of artificial lightning in these spaces?**  
(Choose grade from 1 to 5; 1-not at all, 5-very satisfied)

Answer: 2

**8. Do you feel comfortable and safe in these spaces during nighttime?**

1. Yes
2. No

Answer: Yes

The questionnaire No: 89

Are you conducting a survey and or interview?

1. Yes
2. No

Answer: Yes

You have been asked to complete this survey as part of scientific research "*Increasing the livability of open public space during nighttime: the importance of lightning in the waterfront areas*". The study is designed to determine the usage dynamics of the waterfront area. Your responses are entirely voluntary, and you may refuse to complete any part or all of this survey. This survey is designed to be anonymous, meaning that there should be no way to connect your responses with you. Toward that end, please do not sign your name to the survey, or include any information in your responses that makes it easy to identify you. By completing and submitting the survey, you affirm that you are at least 18 years old and that you give your consent to use your answers in this research.

*General information:*

Age:

1. 18-25;
2. 25-40;
3. 40-55;
4. 55+

Answer: 25-40

Gender

1. Female
2. Male

Answer: Male

*PART A: Open space usage:*

**1. Do you use open public space in the waterfront area?**

1. Yes
2. No

Answer: Yes

**2. Time period: When do you use these spaces the most?**

1. in the morning
2. in the afternoon
3. in the evening/during nighttime
4. other: in the morning and in the evening

Answer: 2) in the afternoon

The questionnaire No: 89

*PART B: Nighttime open space usage:*

**3. Frequency: How often do you visit these spaces during nighttime?**

1. very often - every day
2. often - once or twice per week
3. rarely - one or twice per month
4. almost never

Answer: 3) rarely - one or twice per month

**4. Duration: How much time do you usually spend in these places during nighttime?**

1. more than 1 hour
2. around 30 minutes
3. 10-15 minutes
4. couple of minutes

Answer: 2) around 30 minutes

**5. Activity: What type of activities do you engage in these spaces during nighttime?**

1. leisure and socialization- hanging out with friends or walking the dog
2. recreation - walking, running, cycling, exercise
3. relaxing by myself
4. just passing through
5. Other / walking the dog

Answer: 1) leisure and socialization- hangingt out with friends or walking the dog

**6. When spending time in open space during nighttime what is the most important spatial feature that influence the position and means of usage?**

1. urban furniture and pedestrian/bicycle paths
2. greenery and water proximity
3. Lightning
4. Other: \_\_\_\_\_

Answer: 2) greenery and water proximity

**7. Are you satisfied with the position and overall quality of artificial lightning in these spaces?**

(Choose grade from 1 to 5; 1-not at all, 5-very satisfied)

Answer: 4

**8. Do you feel comfortable and safe in these spaces during nighttime?**

1. Yes
2. No

Answer: No

The questionnaire No: 90

Are you conducting a survey and or interview?

1. Yes
2. No

Answer: Yes

You have been asked to complete this survey as part of scientific research "*Increasing the livability of open public space during nighttime: the importance of lightning in the waterfront areas*". The study is designed to determine the usage dynamics of the waterfront area. Your responses are entirely voluntary, and you may refuse to complete any part or all of this survey. This survey is designed to be anonymous, meaning that there should be no way to connect your responses with you. Toward that end, please do not sign your name to the survey, or include any information in your responses that makes it easy to identify you. By completing and submitting the survey, you affirm that you are at least 18 years old and that you give your consent to use your answers in this research.

*General information:*

Age:

1. 18-25;
2. 25-40;
3. 40-55;
4. 55+

Answer: 55+

Gender

1. Female
2. Male

Answer: Female

*PART A: Open space usage:*

**1. Do you use open public space in the waterfront area?**

1. Yes
2. No

Answer: Yes

**2. Time period: When do you use these spaces the most?**

1. in the morning
2. in the afternoon
3. in the evening/during nighttime
4. other: in the morning and in the evening

Answer: 1) in the morning

The questionnaire No: 90

*PART B: Nighttime open space usage:*

**3. Frequency: How often do you visit these spaces during nighttime?**

1. very often - every day
2. often - once or twice per week
3. rarely - one or twice per month
4. almost never

Answer: 1) very often - every day

**4. Duration: How much time do you usually spend in these places during nighttime?**

1. more than 1 hour
2. around 30 minutes
3. 10-15 minutes
4. couple of minutes

Answer: 2) around 30 minutes

**5. Activity: What type of activities do you engage in these spaces during nighttime?**

1. leisure and socialization- hanging out with friends or walking the dog
2. recreation - walking, running, cycling, exercise
3. relaxing by myself
4. just passing through
5. Other / walking the dog

Answer: 1) leisure and socialization- hangingt out with friends or walking the dog

**6. When spending time in open space during nighttime what is the most important spatial feature that influence the position and means of usage?**

1. urban furniture and pedestrian/bicycle paths
2. greenery and water proximity
3. Lightning
4. Other: \_\_\_\_\_

Answer: 2) greenery and water proximity

**7. Are you satisfied with the position and overall quality of artificial lightning in these spaces?**  
(Choose grade from 1 to 5; 1-not at all, 5-very satisfied)

Answer: 5

**8. Do you feel comfortable and safe in these spaces during nighttime?**

1. Yes
2. No

Answer: No

The questionnaire No: 91

Are you conducting a survey and or interview?

1. Yes
2. No

Answer: Yes

You have been asked to complete this survey as part of scientific research "*Increasing the livability of open public space during nighttime: the importance of lightning in the waterfront areas*". The study is designed to determine the usage dynamics of the waterfront area. Your responses are entirely voluntary, and you may refuse to complete any part or all of this survey. This survey is designed to be anonymous, meaning that there should be no way to connect your responses with you. Toward that end, please do not sign your name to the survey, or include any information in your responses that makes it easy to identify you. By completing and submitting the survey, you affirm that you are at least 18 years old and that you give your consent to use your answers in this research.

*General information:*

Age:

1. 18-25;
2. 25-40;
3. 40-55;
4. 55+

Answer: 18-25

Gender

1. Female
2. Male

Answer: Male

*PART A: Open space usage:*

**1. Do you use open public space in the waterfront area?**

1. Yes
2. No

Answer: No

**2. Time period: When do you use these spaces the most?**

1. in the morning
2. in the afternoon
3. in the evening/during nighttime
4. other: in the morning and in the evening

Answer: 1) in the morning

The questionnaire No: 91

*PART B: Nighttime open space usage:*

**3. Frequency: How often do you visit these spaces during nighttime?**

1. very often - every day
2. often - once or twice per week
3. rarely - one or twice per month
4. almost never

Answer: 4) almost never

**4. Duration: How much time do you usually spend in these places during nighttime?**

1. more than 1 hour
2. around 30 minutes
3. 10-15 minutes
4. couple of minutes

Answer: 2) around 30 minutes

**5. Activity: What type of activities do you engage in these spaces during nighttime?**

1. leisure and socialization- hanging out with friends or walking the dog
2. recreation - walking, running, cycling, exercise
3. relaxing by myself
4. just passing through
5. Other / walking the dog

Answer: 3) relaxing by myself

**6. When spending time in open space during nighttime what is the most important spatial feature that influence the position and means of usage?**

1. urban furniture and pedestrian/bicycle paths
2. greenery and water proximity
3. Lightning
4. Other: \_\_\_\_\_

Answer: 2) greenery and water proximity

**7. Are you satisfied with the position and overall quality of artificial lightning in these spaces?**  
(Choose grade from 1 to 5; 1-not at all, 5-very satisfied)

Answer: 3

**8. Do you feel comfortable and safe in these spaces during nighttime?**

1. Yes
2. No

Answer: Yes

The questionnaire No: 92

Are you conducting a survey and or interview?

1. Yes
2. No

Answer: Yes

You have been asked to complete this survey as part of scientific research "*Increasing the livability of open public space during nighttime: the importance of lightning in the waterfront areas*". The study is designed to determine the usage dynamics of the waterfront area. Your responses are entirely voluntary, and you may refuse to complete any part or all of this survey. This survey is designed to be anonymous, meaning that there should be no way to connect your responses with you. Toward that end, please do not sign your name to the survey, or include any information in your responses that makes it easy to identify you. By completing and submitting the survey, you affirm that you are at least 18 years old and that you give your consent to use your answers in this research.

*General information:*

Age:

1. 18-25;
2. 25-40;
3. 40-55;
4. 55+

Answer: 25-40

Gender

1. Female
2. Male

Answer: Female

*PART A: Open space usage:*

**1. Do you use open public space in the waterfront area?**

1. Yes
2. No

Answer: Yes

**2. Time period: When do you use these spaces the most?**

1. in the morning
2. in the afternoon
3. in the evening/during nighttime
4. other: in the morning and in the evening

Answer: 3) in the evening/during nighttime

The questionnaire No: 92

*PART B: Nighttime open space usage:*

**3. Frequency: How often do you visit these spaces during nighttime?**

1. very often - every day
2. often - once or twice per week
3. rarely - one or twice per month
4. almost never

Answer: 1) very often - every day

**4. Duration: How much time do you usually spend in these places during nighttime?**

1. more than 1 hour
2. around 30 minutes
3. 10-15 minutes
4. couple of minutes

Answer: 2) around 30 minutes

**5. Activity: What type of activities do you engage in these spaces during nighttime?**

1. leisure and socialization- hanging out with friends or walking the dog
2. recreation - walking, running, cycling, exercise
3. relaxing by myself
4. just passing through
5. Other / walking the dog

Answer: Other: walking the dog

**6. When spending time in open space during nighttime what is the most important spatial feature that influence the position and means of usage?**

1. urban furniture and pedestrian/bicycle paths
2. greenery and water proximity
3. Lightning
4. Other: \_\_\_\_\_

Answer: 1) urban furniture and pedestrian/bicycle paths

**7. Are you satisfied with the position and overall quality of artificial lightning in these spaces?**  
(Choose grade from 1 to 5; 1-not at all, 5-very satisfied)

Answer: 5

**8. Do you feel comfortable and safe in these spaces during nighttime?**

1. Yes
2. No

Answer: No

The questionnaire No: 93

Are you conducting a survey and or interview?

1. Yes
2. No

Answer: Yes

You have been asked to complete this survey as part of scientific research "*Increasing the livability of open public space during nighttime: the importance of lightning in the waterfront areas*". The study is designed to determine the usage dynamics of the waterfront area. Your responses are entirely voluntary, and you may refuse to complete any part or all of this survey. This survey is designed to be anonymous, meaning that there should be no way to connect your responses with you. Toward that end, please do not sign your name to the survey, or include any information in your responses that makes it easy to identify you. By completing and submitting the survey, you affirm that you are at least 18 years old and that you give your consent to use your answers in this research.

*General information:*

Age:

1. 18-25;
2. 25-40;
3. 40-55;
4. 55+

Answer: 18-25

Gender

1. Female
2. Male

Answer: Male

*PART A: Open space usage:*

**1. Do you use open public space in the waterfront area?**

1. Yes
2. No

Answer: Yes

**2. Time period: When do you use these spaces the most?**

1. in the morning
2. in the afternoon
3. in the evening/during nighttime
4. other: in the morning and in the evening

Answer: 2) in the afternoon

The questionnaire No: 93

*PART B: Nighttime open space usage:*

**3. Frequency: How often do you visit these spaces during nighttime?**

1. very often - every day
2. often - once or twice per week
3. rarely - one or twice per month
4. almost never

Answer: 4) almost never

**4. Duration: How much time do you usually spend in these places during nighttime?**

1. more than 1 hour
2. around 30 minutes
3. 10-15 minutes
4. couple of minutes

Answer: 2) around 30 minutes

**5. Activity: What type of activities do you engage in these spaces during nighttime?**

1. leisure and socialization- hanging out with friends or walking the dog
2. recreation - walking, running, cycling, exercise
3. relaxing by myself
4. just passing through
5. Other / walking the dog

Answer: 2) recreation - walking, running, cycling, exercise

**6. When spending time in open space during nighttime what is the most important spatial feature that influence the position and means of usage?**

1. urban furniture and pedestrian/bicycle paths
2. greenery and water proximity
3. Lightning
4. Other: \_\_\_\_\_

Answer: 2) greenery and water proximity

**7. Are you satisfied with the position and overall quality of artificial lightning in these spaces?**  
(Choose grade from 1 to 5; 1-not at all, 5-very satisfied)

Answer: 2

**8. Do you feel comfortable and safe in these spaces during nighttime?**

1. Yes
2. No

Answer: No

The questionnaire No: 94

Are you conducting a survey and or interview?

1. Yes
2. No

Answer: Yes

You have been asked to complete this survey as part of scientific research "*Increasing the livability of open public space during nighttime: the importance of lightning in the waterfront areas*". The study is designed to determine the usage dynamics of the waterfront area. Your responses are entirely voluntary, and you may refuse to complete any part or all of this survey. This survey is designed to be anonymous, meaning that there should be no way to connect your responses with you. Toward that end, please do not sign your name to the survey, or include any information in your responses that makes it easy to identify you. By completing and submitting the survey, you affirm that you are at least 18 years old and that you give your consent to use your answers in this research.

*General information:*

Age:

1. 18-25;
2. 25-40;
3. 40-55;
4. 55+

Answer: 25-40

Gender

1. Female
2. Male

Answer: Female

*PART A: Open space usage:*

**1. Do you use open public space in the waterfront area?**

1. Yes
2. No

Answer: Yes

**2. Time period: When do you use these spaces the most?**

1. in the morning
2. in the afternoon
3. in the evening/during nighttime
4. other: in the morning and in the evening

Answer: 3) in the evening/during nighttime

The questionnaire No: 94

*PART B: Nighttime open space usage:*

**3. Frequency: How often do you visit these spaces during nighttime?**

1. very often - every day
2. often - once or twice per week
3. rarely - one or twice per month
4. almost never

Answer: 4) almost never

**4. Duration: How much time do you usually spend in these places during nighttime?**

1. more than 1 hour
2. around 30 minutes
3. 10-15 minutes
4. couple of minutes

Answer: 2) around 30 minutes

**5. Activity: What type of activities do you engage in these spaces during nighttime?**

1. leisure and socialization- hanging out with friends or walking the dog
2. recreation - walking, running, cycling, exercise
3. relaxing by myself
4. just passing through
5. Other / walking the dog

Answer: 1) leisure and socialization- hangingt out with friends or walking the dog

**6. When spending time in open space during nighttime what is the most important spatial feature that influence the position and means of usage?**

1. urban furniture and pedestrian/bicycle paths
2. greenery and water proximity
3. Lightning
4. Other: \_\_\_\_\_

Answer: 3) Lightning

**7. Are you satisfied with the position and overall quality of artificial lightning in these spaces?**

(Choose grade from 1 to 5; 1-not at all, 5-very satisfied)

Answer: 1

**8. Do you feel comfortable and safe in these spaces during nighttime?**

1. Yes
2. No

Answer: No

The questionnaire No: 95

Are you conducting a survey and or interview?

1. Yes
2. No

Answer: Yes

You have been asked to complete this survey as part of scientific research "*Increasing the livability of open public space during nighttime: the importance of lightning in the waterfront areas*". The study is designed to determine the usage dynamics of the waterfront area. Your responses are entirely voluntary, and you may refuse to complete any part or all of this survey. This survey is designed to be anonymous, meaning that there should be no way to connect your responses with you. Toward that end, please do not sign your name to the survey, or include any information in your responses that makes it easy to identify you. By completing and submitting the survey, you affirm that you are at least 18 years old and that you give your consent to use your answers in this research.

*General information:*

Age:

1. 18-25;
2. 25-40;
3. 40-55;
4. 55+

Answer: 25-40

Gender

1. Female
2. Male

Answer: Female

*PART A: Open space usage:*

**1. Do you use open public space in the waterfront area?**

1. Yes
2. No

Answer: Yes

**2. Time period: When do you use these spaces the most?**

1. in the morning
2. in the afternoon
3. in the evening/during nighttime
4. other: in the morning and in the evening

Answer: 3) in the evening/during nighttime

The questionnaire No: 95

*PART B: Nighttime open space usage:*

**3. Frequency: How often do you visit these spaces during nighttime?**

1. very often - every day
2. often - once or twice per week
3. rarely - one or twice per month
4. almost never

Answer: 3) rarely - one or twice per month

**4. Duration: How much time do you usually spend in these places during nighttime?**

1. more than 1 hour
2. around 30 minutes
3. 10-15 minutes
4. couple of minutes

Answer: 1) more than 1 hour

**5. Activity: What type of activities do you engage in these spaces during nighttime?**

1. leisure and socialization- hanging out with friends or walking the dog
2. recreation - walking, running, cycling, exercise
3. relaxing by myself
4. just passing through
5. Other / walking the dog

Answer: 2) recreation - walking, running, cycling, exercise

**6. When spending time in open space during nighttime what is the most important spatial feature that influence the position and means of usage?**

1. urban furniture and pedestrian/bicycle paths
2. greenery and water proximity
3. Lightning
4. Other: \_\_\_\_\_

Answer: 3) Lightning

**7. Are you satisfied with the position and overall quality of artificial lightning in these spaces?**  
(Choose grade from 1 to 5; 1-not at all, 5-very satisfied)

Answer: 2

**8. Do you feel comfortable and safe in these spaces during nighttime?**

1. Yes
2. No

Answer: No

The questionnaire No: 96

Are you conducting a survey and or interview?

1. Yes
2. No

Answer: Yes

You have been asked to complete this survey as part of scientific research "*Increasing the livability of open public space during nighttime: the importance of lightning in the waterfront areas*". The study is designed to determine the usage dynamics of the waterfront area. Your responses are entirely voluntary, and you may refuse to complete any part or all of this survey. This survey is designed to be anonymous, meaning that there should be no way to connect your responses with you. Toward that end, please do not sign your name to the survey, or include any information in your responses that makes it easy to identify you. By completing and submitting the survey, you affirm that you are at least 18 years old and that you give your consent to use your answers in this research.

*General information:*

Age:

1. 18-25;
2. 25-40;
3. 40-55;
4. 55+

Answer: 40-55

Gender

1. Female
2. Male

Answer: Female

*PART A: Open space usage:*

**1. Do you use open public space in the waterfront area?**

1. Yes
2. No

Answer: Yes

**2. Time period: When do you use these spaces the most?**

1. in the morning
2. in the afternoon
3. in the evening/during nighttime
4. other: in the morning and in the evening

Answer: 1) in the morning

The questionnaire No: 96

*PART B: Nighttime open space usage:*

**3. Frequency: How often do you visit these spaces during nighttime?**

1. very often - every day
2. often - once or twice per week
3. rarely - one or twice per month
4. almost never

Answer: 3) rarely - one or twice per month

**4. Duration: How much time do you usually spend in these places during nighttime?**

1. more than 1 hour
2. around 30 minutes
3. 10-15 minutes
4. couple of minutes

Answer: 3) 10-15 minutes

**5. Activity: What type of activities do you engage in these spaces during nighttime?**

1. leisure and socialization- hanging out with friends or walking the dog
2. recreation - walking, running, cycling, exercise
3. relaxing by myself
4. just passing through
5. Other / walking the dog

Answer: 2) recreation - walking, running, cycling, exercise

**6. When spending time in open space during nighttime what is the most important spatial feature that influence the position and means of usage?**

1. urban furniture and pedestrian/bicycle paths
2. greenery and water proximity
3. Lightning
4. Other: \_\_\_\_\_

Answer: 2) greenery and water proximity

**7. Are you satisfied with the position and overall quality of artificial lightning in these spaces?**  
(Choose grade from 1 to 5; 1-not at all, 5-very satisfied)

Answer: 2

**8. Do you feel comfortable and safe in these spaces during nighttime?**

1. Yes
2. No

Answer: No

The questionnaire No: 97

Are you conducting a survey and or interview?

1. Yes
2. No

Answer: Yes

You have been asked to complete this survey as part of scientific research "*Increasing the livability of open public space during nighttime: the importance of lightning in the waterfront areas*". The study is designed to determine the usage dynamics of the waterfront area. Your responses are entirely voluntary, and you may refuse to complete any part or all of this survey. This survey is designed to be anonymous, meaning that there should be no way to connect your responses with you. Toward that end, please do not sign your name to the survey, or include any information in your responses that makes it easy to identify you. By completing and submitting the survey, you affirm that you are at least 18 years old and that you give your consent to use your answers in this research.

*General information:*

Age:

1. 18-25;
2. 25-40;
3. 40-55;
4. 55+

Answer: 18-25

Gender

1. Female
2. Male

Answer: Male

*PART A: Open space usage:*

**1. Do you use open public space in the waterfront area?**

1. Yes
2. No

Answer: Yes

**2. Time period: When do you use these spaces the most?**

1. in the morning
2. in the afternoon
3. in the evening/during nighttime
4. other: in the morning and in the evening

Answer: 3) in the evening/during nighttime

The questionnaire No: 97

*PART B: Nighttime open space usage:*

**3. Frequency: How often do you visit these spaces during nighttime?**

1. very often - every day
2. often - once or twice per week
3. rarely - one or twice per month
4. almost never

Answer: 1) very often - every day

**4. Duration: How much time do you usually spend in these places during nighttime?**

1. more than 1 hour
2. around 30 minutes
3. 10-15 minutes
4. couple of minutes

Answer: 1) more than 1 hour

**5. Activity: What type of activities do you engage in these spaces during nighttime?**

1. leisure and socialization- hanging out with friends or walking the dog
2. recreation - walking, running, cycling, exercise
3. relaxing by myself
4. just passing through
5. Other / walking the dog

Answer: 2) recreation - walking, running, cycling, exercise

**6. When spending time in open space during nighttime what is the most important spatial feature that influence the position and means of usage?**

1. urban furniture and pedestrian/bicycle paths
2. greenery and water proximity
3. Lightning
4. Other: \_\_\_\_\_

Answer: 2) greenery and water proximity

**7. Are you satisfied with the position and overall quality of artificial lightning in these spaces?**  
(Choose grade from 1 to 5; 1-not at all, 5-very satisfied)

Answer: 1

**8. Do you feel comfortable and safe in these spaces during nighttime?**

1. Yes
2. No

Answer: Yes

The questionnaire No: 98

Are you conducting a survey and or interview?

1. Yes
2. No

Answer: Yes

You have been asked to complete this survey as part of scientific research "*Increasing the livability of open public space during nighttime: the importance of lightning in the waterfront areas*". The study is designed to determine the usage dynamics of the waterfront area. Your responses are entirely voluntary, and you may refuse to complete any part or all of this survey. This survey is designed to be anonymous, meaning that there should be no way to connect your responses with you. Toward that end, please do not sign your name to the survey, or include any information in your responses that makes it easy to identify you. By completing and submitting the survey, you affirm that you are at least 18 years old and that you give your consent to use your answers in this research.

*General information:*

Age:

1. 18-25;
2. 25-40;
3. 40-55;
4. 55+

Answer: 18-25

Gender

1. Female
2. Male

Answer: Female

*PART A: Open space usage:*

**1. Do you use open public space in the waterfront area?**

1. Yes
2. No

Answer: Yes

**2. Time period: When do you use these spaces the most?**

1. in the morning
2. in the afternoon
3. in the evening/during nighttime
4. other: in the morning and in the evening

Answer: 1) in the morning

The questionnaire No: 98

*PART B: Nighttime open space usage:*

**3. Frequency: How often do you visit these spaces during nighttime?**

1. very often - every day
2. often - once or twice per week
3. rarely - one or twice per month
4. almost never

Answer: 1) very often - every day

**4. Duration: How much time do you usually spend in these places during nighttime?**

1. more than 1 hour
2. around 30 minutes
3. 10-15 minutes
4. couple of minutes

Answer: 2) around 30 minutes

**5. Activity: What type of activities do you engage in these spaces during nighttime?**

1. leisure and socialization- hanging out with friends or walking the dog
2. recreation - walking, running, cycling, exercise
3. relaxing by myself
4. just passing through
5. Other / walking the dog

Answer: 1) leisure and socialization- hangingt out with friends or walking the dog

**6. When spending time in open space during nighttime what is the most important spatial feature that influence the position and means of usage?**

1. urban furniture and pedestrian/bicycle paths
2. greenery and water proximity
3. Lightning
4. Other: \_\_\_\_\_

Answer: 1) urban furniture and pedestrian/bicycle paths

**7. Are you satisfied with the position and overall quality of artificial lightning in these spaces?**  
(Choose grade from 1 to 5; 1-not at all, 5-very satisfied)

Answer: 5

**8. Do you feel comfortable and safe in these spaces during nighttime?**

1. Yes
2. No

Answer: Yes

The questionnaire No: 99

Are you conducting a survey and or interview?

1. Yes
2. No

Answer: Yes

You have been asked to complete this survey as part of scientific research "*Increasing the livability of open public space during nighttime: the importance of lightning in the waterfront areas*". The study is designed to determine the usage dynamics of the waterfront area. Your responses are entirely voluntary, and you may refuse to complete any part or all of this survey. This survey is designed to be anonymous, meaning that there should be no way to connect your responses with you. Toward that end, please do not sign your name to the survey, or include any information in your responses that makes it easy to identify you. By completing and submitting the survey, you affirm that you are at least 18 years old and that you give your consent to use your answers in this research.

*General information:*

Age:

1. 18-25;
2. 25-40;
3. 40-55;
4. 55+

Answer: 25-40

Gender

1. Female
2. Male

Answer: Male

*PART A: Open space usage:*

**1. Do you use open public space in the waterfront area?**

1. Yes
2. No

Answer: Yes

**2. Time period: When do you use these spaces the most?**

1. in the morning
2. in the afternoon
3. in the evening/during nighttime
4. other: in the morning and in the evening

Answer: 1) in the morning

The questionnaire No: 99

*PART B: Nighttime open space usage:*

**3. Frequency: How often do you visit these spaces during nighttime?**

1. very often - every day
2. often - once or twice per week
3. rarely - one or twice per month
4. almost never

Answer: 3) rarely - one or twice per month

**4. Duration: How much time do you usually spend in these places during nighttime?**

1. more than 1 hour
2. around 30 minutes
3. 10-15 minutes
4. couple of minutes

Answer: 2) around 30 minutes

**5. Activity: What type of activities do you engage in these spaces during nighttime?**

1. leisure and socialization- hanging out with friends or walking the dog
2. recreation - walking, running, cycling, exercise
3. relaxing by myself
4. just passing through
5. Other / walking the dog

Answer: 3) relaxing by myself

**6. When spending time in open space during nighttime what is the most important spatial feature that influence the position and means of usage?**

1. urban furniture and pedestrian/bicycle paths
2. greenery and water proximity
3. Lightning
4. Other: \_\_\_\_\_

Answer: Other: monuments

**7. Are you satisfied with the position and overall quality of artificial lightning in these spaces?**  
(Choose grade from 1 to 5; 1-not at all, 5-very satisfied)

Answer: 3

**8. Do you feel comfortable and safe in these spaces during nighttime?**

1. Yes
2. No

Answer: No

The questionnaire No: 100

Are you conducting a survey and or interview?

1. Yes
2. No

Answer: Yes

You have been asked to complete this survey as part of scientific research "*Increasing the livability of open public space during nighttime: the importance of lightning in the waterfront areas*". The study is designed to determine the usage dynamics of the waterfront area. Your responses are entirely voluntary, and you may refuse to complete any part or all of this survey. This survey is designed to be anonymous, meaning that there should be no way to connect your responses with you. Toward that end, please do not sign your name to the survey, or include any information in your responses that makes it easy to identify you. By completing and submitting the survey, you affirm that you are at least 18 years old and that you give your consent to use your answers in this research.

*General information:*

Age:

1. 18-25;
2. 25-40;
3. 40-55;
4. 55+

Answer: 40-55

Gender

1. Female
2. Male

Answer: Female

*PART A: Open space usage:*

**1. Do you use open public space in the waterfront area?**

1. Yes
2. No

Answer: Yes

**2. Time period: When do you use these spaces the most?**

1. in the morning
2. in the afternoon
3. in the evening/during nighttime
4. other: in the morning and in the evening

Answer: 2) in the afternoon

The questionnaire No: 100

*PART B: Nighttime open space usage:*

**3. Frequency: How often do you visit these spaces during nighttime?**

1. very often - every day
2. often - once or twice per week
3. rarely - one or twice per month
4. almost never

Answer: 2) often - once or twice per week

**4. Duration: How much time do you usually spend in these places during nighttime?**

1. more than 1 hour
2. around 30 minutes
3. 10-15 minutes
4. couple of minutes

Answer: 1) more than 1 hour

**5. Activity: What type of activities do you engage in these spaces during nighttime?**

1. leisure and socialization- hanging out with friends or walking the dog
2. recreation - walking, running, cycling, exercise
3. relaxing by myself
4. just passing through
5. Other / walking the dog

Answer: 1) leisure and socialization- hangingt out with friends or walking the dog

**6. When spending time in open space during nighttime what is the most important spatial feature that influence the position and means of usage?**

1. urban furniture and pedestrian/bicycle paths
2. greenery and water proximity
3. Lightning
4. Other: \_\_\_\_\_

Answer: 2) greenery and water proximity

**7. Are you satisfied with the position and overall quality of artificial lightning in these spaces?**  
(Choose grade from 1 to 5; 1-not at all, 5-very satisfied)

Answer: 2

**8. Do you feel comfortable and safe in these spaces during nighttime?**

1. Yes
2. No

Answer: Yes

The questionnaire No: 101

Are you conducting a survey and or interview?

1. Yes
2. No

Answer: Yes

You have been asked to complete this survey as part of scientific research "*Increasing the livability of open public space during nighttime: the importance of lightning in the waterfront areas*". The study is designed to determine the usage dynamics of the waterfront area. Your responses are entirely voluntary, and you may refuse to complete any part or all of this survey. This survey is designed to be anonymous, meaning that there should be no way to connect your responses with you. Toward that end, please do not sign your name to the survey, or include any information in your responses that makes it easy to identify you. By completing and submitting the survey, you affirm that you are at least 18 years old and that you give your consent to use your answers in this research.

*General information:*

Age:

1. 18-25;
2. 25-40;
3. 40-55;
4. 55+

Answer: 25-40

Gender

1. Female
2. Male

Answer: Female

*PART A: Open space usage:*

**1. Do you use open public space in the waterfront area?**

1. Yes
2. No

Answer: Yes

**2. Time period: When do you use these spaces the most?**

1. in the morning
2. in the afternoon
3. in the evening/during nighttime
4. other: in the morning and in the evening

Answer: 2) in the afternoon

The questionnaire No: 101

*PART B: Nighttime open space usage:*

**3. Frequency: How often do you visit these spaces during nighttime?**

1. very often - every day
2. often - once or twice per week
3. rarely - one or twice per month
4. almost never

Answer: 3) rarely - one or twice per month

**4. Duration: How much time do you usually spend in these places during nighttime?**

1. more than 1 hour
2. around 30 minutes
3. 10-15 minutes
4. couple of minutes

Answer: 1) more than 1 hour

**5. Activity: What type of activities do you engage in these spaces during nighttime?**

1. leisure and socialization- hanging out with friends or walking the dog
2. recreation - walking, running, cycling, exercise
3. relaxing by myself
4. just passing through
5. Other / walking the dog

Answer: 3) relaxing by myself

**6. When spending time in open space during nighttime what is the most important spatial feature that influence the position and means of usage?**

1. urban furniture and pedestrian/bicycle paths
2. greenery and water proximity
3. Lightning
4. Other: \_\_\_\_\_

Answer: 2) greenery and water proximity

**7. Are you satisfied with the position and overall quality of artificial lightning in these spaces?**

(Choose grade from 1 to 5; 1-not at all, 5-very satisfied)

Answer: 4

**8. Do you feel comfortable and safe in these spaces during nighttime?**

1. Yes
2. No

Answer: Yes

The questionnaire No: 102

Are you conducting a survey and or interview?

1. Yes
2. No

Answer: Yes

You have been asked to complete this survey as part of scientific research "*Increasing the livability of open public space during nighttime: the importance of lightning in the waterfront areas*". The study is designed to determine the usage dynamics of the waterfront area. Your responses are entirely voluntary, and you may refuse to complete any part or all of this survey. This survey is designed to be anonymous, meaning that there should be no way to connect your responses with you. Toward that end, please do not sign your name to the survey, or include any information in your responses that makes it easy to identify you. By completing and submitting the survey, you affirm that you are at least 18 years old and that you give your consent to use your answers in this research.

*General information:*

Age:

1. 18-25;
2. 25-40;
3. 40-55;
4. 55+

Answer: 18-25

Gender

1. Female
2. Male

Answer: Male

*PART A: Open space usage:*

**1. Do you use open public space in the waterfront area?**

1. Yes
2. No

Answer: Yes

**2. Time period: When do you use these spaces the most?**

1. in the morning
2. in the afternoon
3. in the evening/during nighttime
4. other: in the morning and in the evening

Answer: 2) in the afternoon

The questionnaire No: 102

*PART B: Nighttime open space usage:*

**3. Frequency: How often do you visit these spaces during nighttime?**

1. very often - every day
2. often - once or twice per week
3. rarely - one or twice per month
4. almost never

Answer: 4) almost never

**4. Duration: How much time do you usually spend in these places during nighttime?**

1. more than 1 hour
2. around 30 minutes
3. 10-15 minutes
4. couple of minutes

Answer: 2) around 30 minutes

**5. Activity: What type of activities do you engage in these spaces during nighttime?**

1. leisure and socialization- hanging out with friends or walking the dog
2. recreation - walking, running, cycling, exercise
3. relaxing by myself
4. just passing through
5. Other / walking the dog

Answer: 3) relaxing by myself

**6. When spending time in open space during nighttime what is the most important spatial feature that influence the position and means of usage?**

1. urban furniture and pedestrian/bicycle paths
2. greenery and water proximity
3. Lightning
4. Other: \_\_\_\_\_

Answer: 3) Lightning

**7. Are you satisfied with the position and overall quality of artificial lightning in these spaces?**  
(Choose grade from 1 to 5; 1-not at all, 5-very satisfied)

Answer: 3

**8. Do you feel comfortable and safe in these spaces during nighttime?**

1. Yes
2. No

Answer: Yes

The questionnaire No: 103

Are you conducting a survey and or interview?

1. Yes
2. No

Answer: Yes

You have been asked to complete this survey as part of scientific research "*Increasing the livability of open public space during nighttime: the importance of lightning in the waterfront areas*". The study is designed to determine the usage dynamics of the waterfront area. Your responses are entirely voluntary, and you may refuse to complete any part or all of this survey. This survey is designed to be anonymous, meaning that there should be no way to connect your responses with you. Toward that end, please do not sign your name to the survey, or include any information in your responses that makes it easy to identify you. By completing and submitting the survey, you affirm that you are at least 18 years old and that you give your consent to use your answers in this research.

*General information:*

Age:

1. 18-25;
2. 25-40;
3. 40-55;
4. 55+

Answer: 25-40

Gender

1. Female
2. Male

Answer: Male

*PART A: Open space usage:*

**1. Do you use open public space in the waterfront area?**

1. Yes
2. No

Answer: Yes

**2. Time period: When do you use these spaces the most?**

1. in the morning
2. in the afternoon
3. in the evening/during nighttime
4. other: in the morning and in the evening

Answer: 1) in the morning

The questionnaire No: 103

*PART B: Nighttime open space usage:*

**3. Frequency: How often do you visit these spaces during nighttime?**

1. very often - every day
2. often - once or twice per week
3. rarely - one or twice per month
4. almost never

Answer: 2) often - once or twice per week

**4. Duration: How much time do you usually spend in these places during nighttime?**

1. more than 1 hour
2. around 30 minutes
3. 10-15 minutes
4. couple of minutes

Answer: 1) more than 1 hour

**5. Activity: What type of activities do you engage in these spaces during nighttime?**

1. leisure and socialization- hanging out with friends or walking the dog
2. recreation - walking, running, cycling, exercise
3. relaxing by myself
4. just passing through
5. Other / walking the dog

Answer: 3) relaxing by myself

**6. When spending time in open space during nighttime what is the most important spatial feature that influence the position and means of usage?**

1. urban furniture and pedestrian/bicycle paths
2. greenery and water proximity
3. Lightning
4. Other: \_\_\_\_\_

Answer: 2) greenery and water proximity

**7. Are you satisfied with the position and overall quality of artificial lightning in these spaces?**  
(Choose grade from 1 to 5; 1-not at all, 5-very satisfied)

Answer: 4

**8. Do you feel comfortable and safe in these spaces during nighttime?**

1. Yes
2. No

Answer: Yes

The questionnaire No: 104

Are you conducting a survey and or interview?

1. Yes
2. No

Answer: Yes

You have been asked to complete this survey as part of scientific research "*Increasing the livability of open public space during nighttime: the importance of lightning in the waterfront areas*". The study is designed to determine the usage dynamics of the waterfront area. Your responses are entirely voluntary, and you may refuse to complete any part or all of this survey. This survey is designed to be anonymous, meaning that there should be no way to connect your responses with you. Toward that end, please do not sign your name to the survey, or include any information in your responses that makes it easy to identify you. By completing and submitting the survey, you affirm that you are at least 18 years old and that you give your consent to use your answers in this research.

*General information:*

Age:

1. 18-25;
2. 25-40;
3. 40-55;
4. 55+

Answer: 25-40

Gender

1. Female
2. Male

Answer: Female

*PART A: Open space usage:*

**1. Do you use open public space in the waterfront area?**

1. Yes
2. No

Answer: Yes

**2. Time period: When do you use these spaces the most?**

1. in the morning
2. in the afternoon
3. in the evening/during nighttime
4. other: in the morning and in the evening

Answer: 1) in the morning

The questionnaire No: 104

*PART B: Nighttime open space usage:*

**3. Frequency: How often do you visit these spaces during nighttime?**

1. very often - every day
2. often - once or twice per week
3. rarely - one or twice per month
4. almost never

Answer: 4) almost never

**4. Duration: How much time do you usually spend in these places during nighttime?**

1. more than 1 hour
2. around 30 minutes
3. 10-15 minutes
4. couple of minutes

Answer: 2) around 30 minutes

**5. Activity: What type of activities do you engage in these spaces during nighttime?**

1. leisure and socialization- hanging out with friends or walking the dog
2. recreation - walking, running, cycling, exercise
3. relaxing by myself
4. just passing through
5. Other / walking the dog

Answer: 4) just passing through

**6. When spending time in open space during nighttime what is the most important spatial feature that influence the position and means of usage?**

1. urban furniture and pedestrian/bicycle paths
2. greenery and water proximity
3. Lightning
4. Other: \_\_\_\_\_

Answer: Other: monuments

**7. Are you satisfied with the position and overall quality of artificial lightning in these spaces?**  
(Choose grade from 1 to 5; 1-not at all, 5-very satisfied)

Answer: 1

**8. Do you feel comfortable and safe in these spaces during nighttime?**

1. Yes
2. No

Answer: No

The questionnaire No: 105

Are you conducting a survey and or interview?

1. Yes
2. No

Answer: Yes

You have been asked to complete this survey as part of scientific research "*Increasing the livability of open public space during nighttime: the importance of lightning in the waterfront areas*". The study is designed to determine the usage dynamics of the waterfront area. Your responses are entirely voluntary, and you may refuse to complete any part or all of this survey. This survey is designed to be anonymous, meaning that there should be no way to connect your responses with you. Toward that end, please do not sign your name to the survey, or include any information in your responses that makes it easy to identify you. By completing and submitting the survey, you affirm that you are at least 18 years old and that you give your consent to use your answers in this research.

*General information:*

Age:

1. 18-25;
2. 25-40;
3. 40-55;
4. 55+

Answer: 18-25

Gender

1. Female
2. Male

Answer: Female

*PART A: Open space usage:*

**1. Do you use open public space in the waterfront area?**

1. Yes
2. No

Answer: Yes

**2. Time period: When do you use these spaces the most?**

1. in the morning
2. in the afternoon
3. in the evening/during nighttime
4. other: in the morning and in the evening

Answer: 4) other: in the morning and in the evening

*PART B: Nighttime open space usage:*

**3. Frequency: How often do you visit these spaces during nighttime?**

1. very often - every day
2. often - once or twice per week
3. rarely - one or twice per month
4. almost never

Answer: 1) very often - every day

**4. Duration: How much time do you usually spend in these places during nighttime?**

1. more than 1 hour
2. around 30 minutes
3. 10-15 minutes
4. couple of minutes

Answer: 2) around 30 minutes

**5. Activity: What type of activities do you engage in these spaces during nighttime?**

1. leisure and socialization- hanging out with friends or walking the dog
2. recreation - walking, running, cycling, exercise
3. relaxing by myself
4. just passing through
5. Other / walking the dog

Answer: 1) leisure and socialization- hangingt out with friends or walking the dog

**6. When spending time in open space during nighttime what is the most important spatial feature that influence the position and means of usage?**

1. urban furniture and pedestrian/bicycle paths
2. greenery and water proximity
3. Lightning
4. Other: \_\_\_\_\_

Answer: 1) urban furniture and pedestrian/bicycle paths

**7. Are you satisfied with the position and overall quality of artificial lightning in these spaces?**  
(Choose grade from 1 to 5; 1-not at all, 5-very satisfied)

Answer: 3

**8. Do you feel comfortable and safe in these spaces during nighttime?**

1. Yes
2. No

Answer: Yes

The questionnaire No: 106

Are you conducting a survey and or interview?

1. Yes
2. No

Answer: Yes

You have been asked to complete this survey as part of scientific research "*Increasing the livability of open public space during nighttime: the importance of lightning in the waterfront areas*". The study is designed to determine the usage dynamics of the waterfront area. Your responses are entirely voluntary, and you may refuse to complete any part or all of this survey. This survey is designed to be anonymous, meaning that there should be no way to connect your responses with you. Toward that end, please do not sign your name to the survey, or include any information in your responses that makes it easy to identify you. By completing and submitting the survey, you affirm that you are at least 18 years old and that you give your consent to use your answers in this research.

*General information:*

Age:

1. 18-25;
2. 25-40;
3. 40-55;
4. 55+

Answer: 40-55

Gender

1. Female
2. Male

Answer: Female

*PART A: Open space usage:*

**1. Do you use open public space in the waterfront area?**

1. Yes
2. No

Answer: Yes

**2. Time period: When do you use these spaces the most?**

1. in the morning
2. in the afternoon
3. in the evening/during nighttime
4. other: in the morning and in the evening

Answer: 3) in the evening/during nighttime

*PART B: Nighttime open space usage:*

**3. Frequency: How often do you visit these spaces during nighttime?**

1. very often - every day
2. often - once or twice per week
3. rarely - one or twice per month
4. almost never

Answer: 3) rarely - one or twice per month

**4. Duration: How much time do you usually spend in these places during nighttime?**

1. more than 1 hour
2. around 30 minutes
3. 10-15 minutes
4. couple of minutes

Answer: 2) around 30 minutes

**5. Activity: What type of activities do you engage in these spaces during nighttime?**

1. leisure and socialization- hanging out with friends or walking the dog
2. recreation - walking, running, cycling, exercise
3. relaxing by myself
4. just passing through
5. Other / walking the dog

Answer: 1) leisure and socialization- hangingt out with friends or walking the dog

**6. When spending time in open space during nighttime what is the most important spatial feature that influence the position and means of usage?**

1. urban furniture and pedestrian/bicycle paths
2. greenery and water proximity
3. Lightning
4. Other: \_\_\_\_\_

Answer: 3) Lightning

**7. Are you satisfied with the position and overall quality of artificial lightning in these spaces?**  
(Choose grade from 1 to 5; 1-not at all, 5-very satisfied)

Answer: 3

**8. Do you feel comfortable and safe in these spaces during nighttime?**

1. Yes
2. No

Answer: Yes

The questionnaire No: 107

Are you conducting a survey and or interview?

1. Yes
2. No

Answer: Yes

You have been asked to complete this survey as part of scientific research "*Increasing the livability of open public space during nighttime: the importance of lightning in the waterfront areas*". The study is designed to determine the usage dynamics of the waterfront area. Your responses are entirely voluntary, and you may refuse to complete any part or all of this survey. This survey is designed to be anonymous, meaning that there should be no way to connect your responses with you. Toward that end, please do not sign your name to the survey, or include any information in your responses that makes it easy to identify you. By completing and submitting the survey, you affirm that you are at least 18 years old and that you give your consent to use your answers in this research.

*General information:*

Age:

1. 18-25;
2. 25-40;
3. 40-55;
4. 55+

Answer: 40-55

Gender

1. Female
2. Male

Answer: Male

*PART A: Open space usage:*

**1. Do you use open public space in the waterfront area?**

1. Yes
2. No

Answer: Yes

**2. Time period: When do you use these spaces the most?**

1. in the morning
2. in the afternoon
3. in the evening/during nighttime
4. other: in the morning and in the evening

Answer: 3) in the evening/during nighttime

*PART B: Nighttime open space usage:*

**3. Frequency: How often do you visit these spaces during nighttime?**

1. very often - every day
2. often - once or twice per week
3. rarely - one or twice per month
4. almost never

Answer: 1) very often - every day

**4. Duration: How much time do you usually spend in these places during nighttime?**

1. more than 1 hour
2. around 30 minutes
3. 10-15 minutes
4. couple of minutes

Answer: 1) more than 1 hour

**5. Activity: What type of activities do you engage in these spaces during nighttime?**

1. leisure and socialization- hanging out with friends or walking the dog
2. recreation - walking, running, cycling, exercise
3. relaxing by myself
4. just passing through
5. Other / walking the dog

Answer: 1) leisure and socialization- hangingt out with friends or walking the dog

**6. When spending time in open space during nighttime what is the most important spatial feature that influence the position and means of usage?**

1. urban furniture and pedestrian/bicycle paths
2. greenery and water proximity
3. Lightning
4. Other: \_\_\_\_\_

Answer: Other: river restaurants

**7. Are you satisfied with the position and overall quality of artificial lightning in these spaces?**  
(Choose grade from 1 to 5; 1-not at all, 5-very satisfied)

Answer: 1

**8. Do you feel comfortable and safe in these spaces during nighttime?**

1. Yes
2. No

Answer: No

The questionnaire No: 108

Are you conducting a survey and or interview?

1. Yes
2. No

Answer: Yes

You have been asked to complete this survey as part of scientific research "*Increasing the livability of open public space during nighttime: the importance of lightning in the waterfront areas*". The study is designed to determine the usage dynamics of the waterfront area. Your responses are entirely voluntary, and you may refuse to complete any part or all of this survey. This survey is designed to be anonymous, meaning that there should be no way to connect your responses with you. Toward that end, please do not sign your name to the survey, or include any information in your responses that makes it easy to identify you. By completing and submitting the survey, you affirm that you are at least 18 years old and that you give your consent to use your answers in this research.

*General information:*

Age:

1. 18-25;
2. 25-40;
3. 40-55;
4. 55+

Answer: 25-40

Gender

1. Female
2. Male

Answer: Female

*PART A: Open space usage:*

**1. Do you use open public space in the waterfront area?**

1. Yes
2. No

Answer: Yes

**2. Time period: When do you use these spaces the most?**

1. in the morning
2. in the afternoon
3. in the evening/during nighttime
4. other: in the morning and in the evening

Answer: 1) in the morning

The questionnaire No: 108

*PART B: Nighttime open space usage:*

**3. Frequency: How often do you visit these spaces during nighttime?**

1. very often - every day
2. often - once or twice per week
3. rarely - one or twice per month
4. almost never

Answer: 2) often - once or twice per week

**4. Duration: How much time do you usually spend in these places during nighttime?**

1. more than 1 hour
2. around 30 minutes
3. 10-15 minutes
4. couple of minutes

Answer: 1) more than 1 hour

**5. Activity: What type of activities do you engage in these spaces during nighttime?**

1. leisure and socialization- hanging out with friends or walking the dog
2. recreation - walking, running, cycling, exercise
3. relaxing by myself
4. just passing through
5. Other / walking the dog

Answer: Other: walking the dog

**6. When spending time in open space during nighttime what is the most important spatial feature that influence the position and means of usage?**

1. urban furniture and pedestrian/bicycle paths
2. greenery and water proximity
3. Lightning
4. Other: \_\_\_\_\_

Answer: 3) Lightning

**7. Are you satisfied with the position and overall quality of artificial lightning in these spaces?**  
(Choose grade from 1 to 5; 1-not at all, 5-very satisfied)

Answer: 1

**8. Do you feel comfortable and safe in these spaces during nighttime?**

1. Yes
2. No

Answer: No

The questionnaire No: 109

Are you conducting a survey and or interview?

1. Yes
2. No

Answer: Yes

You have been asked to complete this survey as part of scientific research "*Increasing the livability of open public space during nighttime: the importance of lightning in the waterfront areas*". The study is designed to determine the usage dynamics of the waterfront area. Your responses are entirely voluntary, and you may refuse to complete any part or all of this survey. This survey is designed to be anonymous, meaning that there should be no way to connect your responses with you. Toward that end, please do not sign your name to the survey, or include any information in your responses that makes it easy to identify you. By completing and submitting the survey, you affirm that you are at least 18 years old and that you give your consent to use your answers in this research.

*General information:*

Age:

1. 18-25;
2. 25-40;
3. 40-55;
4. 55+

Answer: 18-25

Gender

1. Female
2. Male

Answer: Male

*PART A: Open space usage:*

**1. Do you use open public space in the waterfront area?**

1. Yes
2. No

Answer: Yes

**2. Time period: When do you use these spaces the most?**

1. in the morning
2. in the afternoon
3. in the evening/during nighttime
4. other: in the morning and in the evening

Answer: 2) in the afternoon

*PART B: Nighttime open space usage:*

**3. Frequency: How often do you visit these spaces during nighttime?**

1. very often - every day
2. often - once or twice per week
3. rarely - one or twice per month
4. almost never

Answer: 3) rarely - one or twice per month

**4. Duration: How much time do you usually spend in these places during nighttime?**

1. more than 1 hour
2. around 30 minutes
3. 10-15 minutes
4. couple of minutes

Answer: 4) couple of minutes

**5. Activity: What type of activities do you engage in these spaces during nighttime?**

1. leisure and socialization- hanging out with friends or walking the dog
2. recreation - walking, running, cycling, exercise
3. relaxing by myself
4. just passing through
5. Other / walking the dog

Answer: 1) leisure and socialization- hangingt out with friends or walking the dog

**6. When spending time in open space during nighttime what is the most important spatial feature that influence the position and means of usage?**

1. urban furniture and pedestrian/bicycle paths
2. greenery and water proximity
3. Lightning
4. Other: \_\_\_\_\_

Answer: 2) greenery and water proximity

**7. Are you satisfied with the position and overall quality of artificial lightning in these spaces?**  
(Choose grade from 1 to 5; 1-not at all, 5-very satisfied)

Answer: 3

**8. Do you feel comfortable and safe in these spaces during nighttime?**

1. Yes
2. No

Answer: No

The questionnaire No: 110

Are you conducting a survey and or interview?

1. Yes
2. No

Answer: Yes

You have been asked to complete this survey as part of scientific research "*Increasing the livability of open public space during nighttime: the importance of lightning in the waterfront areas*". The study is designed to determine the usage dynamics of the waterfront area. Your responses are entirely voluntary, and you may refuse to complete any part or all of this survey. This survey is designed to be anonymous, meaning that there should be no way to connect your responses with you. Toward that end, please do not sign your name to the survey, or include any information in your responses that makes it easy to identify you. By completing and submitting the survey, you affirm that you are at least 18 years old and that you give your consent to use your answers in this research.

*General information:*

Age:

1. 18-25;
2. 25-40;
3. 40-55;
4. 55+

Answer: 25-40

Gender

1. Female
2. Male

Answer: Female

*PART A: Open space usage:*

**1. Do you use open public space in the waterfront area?**

1. Yes
2. No

Answer: Yes

**2. Time period: When do you use these spaces the most?**

1. in the morning
2. in the afternoon
3. in the evening/during nighttime
4. other: in the morning and in the evening

Answer: 3) in the evening/during nighttime

The questionnaire No: 110

*PART B: Nighttime open space usage:*

**3. Frequency: How often do you visit these spaces during nighttime?**

1. very often - every day
2. often - once or twice per week
3. rarely - one or twice per month
4. almost never

Answer: 3) rarely - one or twice per month

**4. Duration: How much time do you usually spend in these places during nighttime?**

1. more than 1 hour
2. around 30 minutes
3. 10-15 minutes
4. couple of minutes

Answer: 3) 10-15 minutes

**5. Activity: What type of activities do you engage in these spaces during nighttime?**

1. leisure and socialization- hanging out with friends or walking the dog
2. recreation - walking, running, cycling, exercise
3. relaxing by myself
4. just passing through
5. Other / walking the dog

Answer: 2) recreation - walking, running, cycling, exercise

**6. When spending time in open space during nighttime what is the most important spatial feature that influence the position and means of usage?**

1. urban furniture and pedestrian/bicycle paths
2. greenery and water proximity
3. Lightning
4. Other: \_\_\_\_\_

Answer: 2) greenery and water proximity

**7. Are you satisfied with the position and overall quality of artificial lightning in these spaces?**  
(Choose grade from 1 to 5; 1-not at all, 5-very satisfied)

Answer: 4

**8. Do you feel comfortable and safe in these spaces during nighttime?**

1. Yes
2. No

Answer: No

The questionnaire No: 111

Are you conducting a survey and or interview?

1. Yes
2. No

Answer: Yes

You have been asked to complete this survey as part of scientific research "*Increasing the livability of open public space during nighttime: the importance of lightning in the waterfront areas*". The study is designed to determine the usage dynamics of the waterfront area. Your responses are entirely voluntary, and you may refuse to complete any part or all of this survey. This survey is designed to be anonymous, meaning that there should be no way to connect your responses with you. Toward that end, please do not sign your name to the survey, or include any information in your responses that makes it easy to identify you. By completing and submitting the survey, you affirm that you are at least 18 years old and that you give your consent to use your answers in this research.

*General information:*

Age:

1. 18-25;
2. 25-40;
3. 40-55;
4. 55+

Answer: 25-40

Gender

1. Female
2. Male

Answer: Male

*PART A: Open space usage:*

**1. Do you use open public space in the waterfront area?**

1. Yes
2. No

Answer: Yes

**2. Time period: When do you use these spaces the most?**

1. in the morning
2. in the afternoon
3. in the evening/during nighttime
4. other: in the morning and in the evening

Answer: 2) in the afternoon

The questionnaire No: 111

*PART B: Nighttime open space usage:*

**3. Frequency: How often do you visit these spaces during nighttime?**

1. very often - every day
2. often - once or twice per week
3. rarely - one or twice per month
4. almost never

Answer: 2) often - once or twice per week

**4. Duration: How much time do you usually spend in these places during nighttime?**

1. more than 1 hour
2. around 30 minutes
3. 10-15 minutes
4. couple of minutes

Answer: 3) 10-15 minutes

**5. Activity: What type of activities do you engage in these spaces during nighttime?**

1. leisure and socialization- hanging out with friends or walking the dog
2. recreation - walking, running, cycling, exercise
3. relaxing by myself
4. just passing through
5. Other / walking the dog

Answer: 1) leisure and socialization- hangingt out with friends or walking the dog

**6. When spending time in open space during nighttime what is the most important spatial feature that influence the position and means of usage?**

1. urban furniture and pedestrian/bicycle paths
2. greenery and water proximity
3. Lightning
4. Other: \_\_\_\_\_

Answer: 2) greenery and water proximity

**7. Are you satisfied with the position and overall quality of artificial lightning in these spaces?**  
(Choose grade from 1 to 5; 1-not at all, 5-very satisfied)

Answer: 2

**8. Do you feel comfortable and safe in these spaces during nighttime?**

1. Yes
2. No

Answer: No

The questionnaire No: 112

Are you conducting a survey and or interview?

1. Yes
2. No

Answer: Yes

You have been asked to complete this survey as part of scientific research "*Increasing the livability of open public space during nighttime: the importance of lightning in the waterfront areas*". The study is designed to determine the usage dynamics of the waterfront area. Your responses are entirely voluntary, and you may refuse to complete any part or all of this survey. This survey is designed to be anonymous, meaning that there should be no way to connect your responses with you. Toward that end, please do not sign your name to the survey, or include any information in your responses that makes it easy to identify you. By completing and submitting the survey, you affirm that you are at least 18 years old and that you give your consent to use your answers in this research.

*General information:*

Age:

1. 18-25;
2. 25-40;
3. 40-55;
4. 55+

Answer: 25-40

Gender

1. Female
2. Male

Answer: Female

*PART A: Open space usage:*

**1. Do you use open public space in the waterfront area?**

1. Yes
2. No

Answer: Yes

**2. Time period: When do you use these spaces the most?**

1. in the morning
2. in the afternoon
3. in the evening/during nighttime
4. other: in the morning and in the evening

Answer: 2) in the afternoon

The questionnaire No: 112

*PART B: Nighttime open space usage:*

**3. Frequency: How often do you visit these spaces during nighttime?**

1. very often - every day
2. often - once or twice per week
3. rarely - one or twice per month
4. almost never

Answer: 3) rarely - one or twice per month

**4. Duration: How much time do you usually spend in these places during nighttime?**

1. more than 1 hour
2. around 30 minutes
3. 10-15 minutes
4. couple of minutes

Answer: 2) around 30 minutes

**5. Activity: What type of activities do you engage in these spaces during nighttime?**

1. leisure and socialization- hanging out with friends or walking the dog
2. recreation - walking, running, cycling, exercise
3. relaxing by myself
4. just passing through
5. Other / walking the dog

Answer: 1) leisure and socialization- hangingt out with friends or walking the dog

**6. When spending time in open space during nighttime what is the most important spatial feature that influence the position and means of usage?**

1. urban furniture and pedestrian/bicycle paths
2. greenery and water proximity
3. Lightning
4. Other: \_\_\_\_\_

Answer: Other: monuments

**7. Are you satisfied with the position and overall quality of artificial lightning in these spaces?**  
(Choose grade from 1 to 5; 1-not at all, 5-very satisfied)

Answer: 3

**8. Do you feel comfortable and safe in these spaces during nighttime?**

1. Yes
2. No

Answer: No

The questionnaire No: 113

Are you conducting a survey and or interview?

1. Yes
2. No

Answer: Yes

You have been asked to complete this survey as part of scientific research "*Increasing the livability of open public space during nighttime: the importance of lightning in the waterfront areas*". The study is designed to determine the usage dynamics of the waterfront area. Your responses are entirely voluntary, and you may refuse to complete any part or all of this survey. This survey is designed to be anonymous, meaning that there should be no way to connect your responses with you. Toward that end, please do not sign your name to the survey, or include any information in your responses that makes it easy to identify you. By completing and submitting the survey, you affirm that you are at least 18 years old and that you give your consent to use your answers in this research.

*General information:*

Age:

1. 18-25;
2. 25-40;
3. 40-55;
4. 55+

Answer: 18-25

Gender

1. Female
2. Male

Answer: Female

*PART A: Open space usage:*

**1. Do you use open public space in the waterfront area?**

1. Yes
2. No

Answer: Yes

**2. Time period: When do you use these spaces the most?**

1. in the morning
2. in the afternoon
3. in the evening/during nighttime
4. other: in the morning and in the evening

Answer: 4) other: in the morning and in the evening

The questionnaire No: 113

*PART B: Nighttime open space usage:*

**3. Frequency: How often do you visit these spaces during nighttime?**

1. very often - every day
2. often - once or twice per week
3. rarely - one or twice per month
4. almost never

Answer: 3) rarely - one or twice per month

**4. Duration: How much time do you usually spend in these places during nighttime?**

1. more than 1 hour
2. around 30 minutes
3. 10-15 minutes
4. couple of minutes

Answer: 1) more than 1 hour

**5. Activity: What type of activities do you engage in these spaces during nighttime?**

1. leisure and socialization- hanging out with friends or walking the dog
2. recreation - walking, running, cycling, exercise
3. relaxing by myself
4. just passing through
5. Other / walking the dog

Answer: 4) just passing through

**6. When spending time in open space during nighttime what is the most important spatial feature that influence the position and means of usage?**

1. urban furniture and pedestrian/bicycle paths
2. greenery and water proximity
3. Lightning
4. Other: \_\_\_\_\_

Answer: 2) greenery and water proximity

**7. Are you satisfied with the position and overall quality of artificial lightning in these spaces?**  
(Choose grade from 1 to 5; 1-not at all, 5-very satisfied)

Answer: 2

**8. Do you feel comfortable and safe in these spaces during nighttime?**

1. Yes
2. No

Answer: No

The questionnaire No: 114

Are you conducting a survey and or interview?

1. Yes
2. No

Answer: Yes

You have been asked to complete this survey as part of scientific research "*Increasing the livability of open public space during nighttime: the importance of lightning in the waterfront areas*". The study is designed to determine the usage dynamics of the waterfront area. Your responses are entirely voluntary, and you may refuse to complete any part or all of this survey. This survey is designed to be anonymous, meaning that there should be no way to connect your responses with you. Toward that end, please do not sign your name to the survey, or include any information in your responses that makes it easy to identify you. By completing and submitting the survey, you affirm that you are at least 18 years old and that you give your consent to use your answers in this research.

*General information:*

Age:

1. 18-25;
2. 25-40;
3. 40-55;
4. 55+

Answer: 18-25

Gender

1. Female
2. Male

Answer: Male

*PART A: Open space usage:*

**1. Do you use open public space in the waterfront area?**

1. Yes
2. No

Answer: Yes

**2. Time period: When do you use these spaces the most?**

1. in the morning
2. in the afternoon
3. in the evening/during nighttime
4. other: in the morning and in the evening

Answer: 3) in the evening/during nighttime

The questionnaire No: 114

*PART B: Nighttime open space usage:*

**3. Frequency: How often do you visit these spaces during nighttime?**

1. very often - every day
2. often - once or twice per week
3. rarely - one or twice per month
4. almost never

Answer: 2) often - once or twice per week

**4. Duration: How much time do you usually spend in these places during nighttime?**

1. more than 1 hour
2. around 30 minutes
3. 10-15 minutes
4. couple of minutes

Answer: 2) around 30 minutes

**5. Activity: What type of activities do you engage in these spaces during nighttime?**

1. leisure and socialization- hanging out with friends or walking the dog
2. recreation - walking, running, cycling, exercise
3. relaxing by myself
4. just passing through
5. Other / walking the dog

Answer: Other: walking the dog

**6. When spending time in open space during nighttime what is the most important spatial feature that influence the position and means of usage?**

1. urban furniture and pedestrian/bicycle paths
2. greenery and water proximity
3. Lightning
4. Other: \_\_\_\_\_

Answer: 2) greenery and water proximity

**7. Are you satisfied with the position and overall quality of artificial lightning in these spaces?**  
(Choose grade from 1 to 5; 1-not at all, 5-very satisfied)

Answer: 1

**8. Do you feel comfortable and safe in these spaces during nighttime?**

1. Yes
2. No

Answer: No

The questionnaire No: 115

Are you conducting a survey and or interview?

1. Yes
2. No

Answer: Yes

You have been asked to complete this survey as part of scientific research "*Increasing the livability of open public space during nighttime: the importance of lightning in the waterfront areas*". The study is designed to determine the usage dynamics of the waterfront area. Your responses are entirely voluntary, and you may refuse to complete any part or all of this survey. This survey is designed to be anonymous, meaning that there should be no way to connect your responses with you. Toward that end, please do not sign your name to the survey, or include any information in your responses that makes it easy to identify you. By completing and submitting the survey, you affirm that you are at least 18 years old and that you give your consent to use your answers in this research.

*General information:*

Age:

1. 18-25;
2. 25-40;
3. 40-55;
4. 55+

Answer: 25-40

Gender

1. Female
2. Male

Answer: Female

*PART A: Open space usage:*

**1. Do you use open public space in the waterfront area?**

1. Yes
2. No

Answer: Yes

**2. Time period: When do you use these spaces the most?**

1. in the morning
2. in the afternoon
3. in the evening/during nighttime
4. other: in the morning and in the evening

Answer: 2) in the afternoon

*PART B: Nighttime open space usage:*

**3. Frequency: How often do you visit these spaces during nighttime?**

1. very often - every day
2. often - once or twice per week
3. rarely - one or twice per month
4. almost never

Answer: 3) rarely - one or twice per month

**4. Duration: How much time do you usually spend in these places during nighttime?**

1. more than 1 hour
2. around 30 minutes
3. 10-15 minutes
4. couple of minutes

Answer: 3) 10-15 minutes

**5. Activity: What type of activities do you engage in these spaces during nighttime?**

1. leisure and socialization- hanging out with friends or walking the dog
2. recreation - walking, running, cycling, exercise
3. relaxing by myself
4. just passing through
5. Other / walking the dog

Answer: 1) leisure and socialization- hangingt out with friends or walking the dog

**6. When spending time in open space during nighttime what is the most important spatial feature that influence the position and means of usage?**

1. urban furniture and pedestrian/bicycle paths
2. greenery and water proximity
3. Lightning
4. Other: \_\_\_\_\_

Answer: Other: river restaurants

**7. Are you satisfied with the position and overall quality of artificial lightning in these spaces?**

(Choose grade from 1 to 5; 1-not at all, 5-very satisfied)

Answer: 4

**8. Do you feel comfortable and safe in these spaces during nighttime?**

1. Yes
2. No

Answer: Yes

The questionnaire No: 116

Are you conducting a survey and or interview?

1. Yes
2. No

Answer: Yes

You have been asked to complete this survey as part of scientific research "*Increasing the livability of open public space during nighttime: the importance of lightning in the waterfront areas*". The study is designed to determine the usage dynamics of the waterfront area. Your responses are entirely voluntary, and you may refuse to complete any part or all of this survey. This survey is designed to be anonymous, meaning that there should be no way to connect your responses with you. Toward that end, please do not sign your name to the survey, or include any information in your responses that makes it easy to identify you. By completing and submitting the survey, you affirm that you are at least 18 years old and that you give your consent to use your answers in this research.

*General information:*

Age:

1. 18-25;
2. 25-40;
3. 40-55;
4. 55+

Answer: 25-40

Gender

1. Female
2. Male

Answer: Female

*PART A: Open space usage:*

**1. Do you use open public space in the waterfront area?**

1. Yes
2. No

Answer: Yes

**2. Time period: When do you use these spaces the most?**

1. in the morning
2. in the afternoon
3. in the evening/during nighttime
4. other: in the morning and in the evening

Answer: 3) in the evening/during nighttime

*PART B: Nighttime open space usage:*

**3. Frequency: How often do you visit these spaces during nighttime?**

1. very often - every day
2. often - once or twice per week
3. rarely - one or twice per month
4. almost never

Answer: 4) almost never

**4. Duration: How much time do you usually spend in these places during nighttime?**

1. more than 1 hour
2. around 30 minutes
3. 10-15 minutes
4. couple of minutes

Answer: 1) more than 1 hour

**5. Activity: What type of activities do you engage in these spaces during nighttime?**

1. leisure and socialization- hanging out with friends or walking the dog
2. recreation - walking, running, cycling, exercise
3. relaxing by myself
4. just passing through
5. Other / walking the dog

Answer: Other: walking the dog

**6. When spending time in open space during nighttime what is the most important spatial feature that influence the position and means of usage?**

1. urban furniture and pedestrian/bicycle paths
2. greenery and water proximity
3. Lightning
4. Other: \_\_\_\_\_

Answer: 2) greenery and water proximity

**7. Are you satisfied with the position and overall quality of artificial lightning in these spaces?**  
(Choose grade from 1 to 5; 1-not at all, 5-very satisfied)

Answer: 2

**8. Do you feel comfortable and safe in these spaces during nighttime?**

1. Yes
2. No

Answer: Yes

The questionnaire No: 117

Are you conducting a survey and or interview?

1. Yes
2. No

Answer: Yes

You have been asked to complete this survey as part of scientific research "*Increasing the livability of open public space during nighttime: the importance of lightning in the waterfront areas*". The study is designed to determine the usage dynamics of the waterfront area. Your responses are entirely voluntary, and you may refuse to complete any part or all of this survey. This survey is designed to be anonymous, meaning that there should be no way to connect your responses with you. Toward that end, please do not sign your name to the survey, or include any information in your responses that makes it easy to identify you. By completing and submitting the survey, you affirm that you are at least 18 years old and that you give your consent to use your answers in this research.

*General information:*

Age:

1. 18-25;
2. 25-40;
3. 40-55;
4. 55+

Answer: 25-40

Gender

1. Female
2. Male

Answer: Male

*PART A: Open space usage:*

**1. Do you use open public space in the waterfront area?**

1. Yes
2. No

Answer: Yes

**2. Time period: When do you use these spaces the most?**

1. in the morning
2. in the afternoon
3. in the evening/during nighttime
4. other: in the morning and in the evening

Answer: 3) in the evening/during nighttime

The questionnaire No: 117

*PART B: Nighttime open space usage:*

**3. Frequency: How often do you visit these spaces during nighttime?**

1. very often - every day
2. often - once or twice per week
3. rarely - one or twice per month
4. almost never

Answer: 3) rarely - one or twice per month

**4. Duration: How much time do you usually spend in these places during nighttime?**

1. more than 1 hour
2. around 30 minutes
3. 10-15 minutes
4. couple of minutes

Answer: 2) around 30 minutes

**5. Activity: What type of activities do you engage in these spaces during nighttime?**

1. leisure and socialization- hanging out with friends or walking the dog
2. recreation - walking, running, cycling, exercise
3. relaxing by myself
4. just passing through
5. Other / walking the dog

Answer: 2) recreation - walking, running, cycling, exercise

**6. When spending time in open space during nighttime what is the most important spatial feature that influence the position and means of usage?**

1. urban furniture and pedestrian/bicycle paths
2. greenery and water proximity
3. Lightning
4. Other: \_\_\_\_\_

Answer: Other: monuments

**7. Are you satisfied with the position and overall quality of artificial lightning in these spaces?**  
(Choose grade from 1 to 5; 1-not at all, 5-very satisfied)

Answer: 3

**8. Do you feel comfortable and safe in these spaces during nighttime?**

1. Yes
2. No

Answer: No

The questionnaire No: 118

Are you conducting a survey and or interview?

1. Yes
2. No

Answer: Yes

You have been asked to complete this survey as part of scientific research "*Increasing the livability of open public space during nighttime: the importance of lightning in the waterfront areas*". The study is designed to determine the usage dynamics of the waterfront area. Your responses are entirely voluntary, and you may refuse to complete any part or all of this survey. This survey is designed to be anonymous, meaning that there should be no way to connect your responses with you. Toward that end, please do not sign your name to the survey, or include any information in your responses that makes it easy to identify you. By completing and submitting the survey, you affirm that you are at least 18 years old and that you give your consent to use your answers in this research.

*General information:*

Age:

1. 18-25;
2. 25-40;
3. 40-55;
4. 55+

Answer: 18-25

Gender

1. Female
2. Male

Answer: Female

*PART A: Open space usage:*

**1. Do you use open public space in the waterfront area?**

1. Yes
2. No

Answer: No

**2. Time period: When do you use these spaces the most?**

1. in the morning
2. in the afternoon
3. in the evening/during nighttime
4. other: in the morning and in the evening

Answer: 1) in the morning

The questionnaire No: 118

*PART B: Nighttime open space usage:*

**3. Frequency: How often do you visit these spaces during nighttime?**

1. very often - every day
2. often - once or twice per week
3. rarely - one or twice per month
4. almost never

Answer: 3) rarely - one or twice per month

**4. Duration: How much time do you usually spend in these places during nighttime?**

1. more than 1 hour
2. around 30 minutes
3. 10-15 minutes
4. couple of minutes

Answer: 3) 10-15 minutes

**5. Activity: What type of activities do you engage in these spaces during nighttime?**

1. leisure and socialization- hanging out with friends or walking the dog
2. recreation - walking, running, cycling, exercise
3. relaxing by myself
4. just passing through
5. Other / walking the dog

Answer: 2) recreation - walking, running, cycling, exercise

**6. When spending time in open space during nighttime what is the most important spatial feature that influence the position and means of usage?**

1. urban furniture and pedestrian/bicycle paths
2. greenery and water proximity
3. Lightning
4. Other: \_\_\_\_\_

Answer: 1) urban furniture and pedestrian/bicycle paths

**7. Are you satisfied with the position and overall quality of artificial lightning in these spaces?**  
(Choose grade from 1 to 5; 1-not at all, 5-very satisfied)

Answer: 2

**8. Do you feel comfortable and safe in these spaces during nighttime?**

1. Yes
2. No

Answer: No

The questionnaire No: 119

Are you conducting a survey and or interview?

1. Yes
2. No

Answer: Yes

You have been asked to complete this survey as part of scientific research "*Increasing the livability of open public space during nighttime: the importance of lightning in the waterfront areas*". The study is designed to determine the usage dynamics of the waterfront area. Your responses are entirely voluntary, and you may refuse to complete any part or all of this survey. This survey is designed to be anonymous, meaning that there should be no way to connect your responses with you. Toward that end, please do not sign your name to the survey, or include any information in your responses that makes it easy to identify you. By completing and submitting the survey, you affirm that you are at least 18 years old and that you give your consent to use your answers in this research.

*General information:*

Age:

1. 18-25;
2. 25-40;
3. 40-55;
4. 55+

Answer: 25-40

Gender

1. Female
2. Male

Answer: Female

*PART A: Open space usage:*

**1. Do you use open public space in the waterfront area?**

1. Yes
2. No

Answer: Yes

**2. Time period: When do you use these spaces the most?**

1. in the morning
2. in the afternoon
3. in the evening/during nighttime
4. other: in the morning and in the evening

Answer: 3) in the evening/during nighttime

*PART B: Nighttime open space usage:*

**3. Frequency: How often do you visit these spaces during nighttime?**

1. very often - every day
2. often - once or twice per week
3. rarely - one or twice per month
4. almost never

Answer: 3) rarely - one or twice per month

**4. Duration: How much time do you usually spend in these places during nighttime?**

1. more than 1 hour
2. around 30 minutes
3. 10-15 minutes
4. couple of minutes

Answer: 3) 10-15 minutes

**5. Activity: What type of activities do you engage in these spaces during nighttime?**

1. leisure and socialization- hanging out with friends or walking the dog
2. recreation - walking, running, cycling, exercise
3. relaxing by myself
4. just passing through
5. Other / walking the dog

Answer: 2) recreation - walking, running, cycling, exercise

**6. When spending time in open space during nighttime what is the most important spatial feature that influence the position and means of usage?**

1. urban furniture and pedestrian/bicycle paths
2. greenery and water proximity
3. Lightning
4. Other: \_\_\_\_\_

Answer: 3) Lightning

**7. Are you satisfied with the position and overall quality of artificial lightning in these spaces?**  
(Choose grade from 1 to 5; 1-not at all, 5-very satisfied)

Answer: 4

**8. Do you feel comfortable and safe in these spaces during nighttime?**

1. Yes
2. No

Answer: No

The questionnaire No: 120

Are you conducting a survey and or interview?

1. Yes
2. No

Answer: Yes

You have been asked to complete this survey as part of scientific research "*Increasing the livability of open public space during nighttime: the importance of lightning in the waterfront areas*". The study is designed to determine the usage dynamics of the waterfront area. Your responses are entirely voluntary, and you may refuse to complete any part or all of this survey. This survey is designed to be anonymous, meaning that there should be no way to connect your responses with you. Toward that end, please do not sign your name to the survey, or include any information in your responses that makes it easy to identify you. By completing and submitting the survey, you affirm that you are at least 18 years old and that you give your consent to use your answers in this research.

*General information:*

Age:

1. 18-25;
2. 25-40;
3. 40-55;
4. 55+

Answer: 40-55

Gender

1. Female
2. Male

Answer: Male

*PART A: Open space usage:*

**1. Do you use open public space in the waterfront area?**

1. Yes
2. No

Answer: Yes

**2. Time period: When do you use these spaces the most?**

1. in the morning
2. in the afternoon
3. in the evening/during nighttime
4. other: in the morning and in the evening

Answer: 3) in the evening/during nighttime

The questionnaire No: 120

*PART B: Nighttime open space usage:*

**3. Frequency: How often do you visit these spaces during nighttime?**

1. very often - every day
2. often - once or twice per week
3. rarely - one or twice per month
4. almost never

Answer: 2) often - once or twice per week

**4. Duration: How much time do you usually spend in these places during nighttime?**

1. more than 1 hour
2. around 30 minutes
3. 10-15 minutes
4. couple of minutes

Answer: 1) more than 1 hour

**5. Activity: What type of activities do you engage in these spaces during nighttime?**

1. leisure and socialization- hanging out with friends or walking the dog
2. recreation - walking, running, cycling, exercise
3. relaxing by myself
4. just passing through
5. Other / walking the dog

Answer: 1) leisure and socialization- hangingt out with friends or walking the dog

**6. When spending time in open space during nighttime what is the most important spatial feature that influence the position and means of usage?**

1. urban furniture and pedestrian/bicycle paths
2. greenery and water proximity
3. Lightning
4. Other: \_\_\_\_\_

Answer: 3) Lightning

**7. Are you satisfied with the position and overall quality of artificial lightning in these spaces?**

(Choose grade from 1 to 5; 1-not at all, 5-very satisfied)

Answer: 1

**8. Do you feel comfortable and safe in these spaces during nighttime?**

1. Yes
2. No

Answer: No

The questionnaire No: 121

Are you conducting a survey and or interview?

1. Yes
2. No

Answer: Yes

You have been asked to complete this survey as part of scientific research "*Increasing the livability of open public space during nighttime: the importance of lightning in the waterfront areas*". The study is designed to determine the usage dynamics of the waterfront area. Your responses are entirely voluntary, and you may refuse to complete any part or all of this survey. This survey is designed to be anonymous, meaning that there should be no way to connect your responses with you. Toward that end, please do not sign your name to the survey, or include any information in your responses that makes it easy to identify you. By completing and submitting the survey, you affirm that you are at least 18 years old and that you give your consent to use your answers in this research.

*General information:*

Age:

1. 18-25;
2. 25-40;
3. 40-55;
4. 55+

Answer: 25-40

Gender

1. Female
2. Male

Answer: Female

*PART A: Open space usage:*

**1. Do you use open public space in the waterfront area?**

1. Yes
2. No

Answer: No

**2. Time period: When do you use these spaces the most?**

1. in the morning
2. in the afternoon
3. in the evening/during nighttime
4. other: in the morning and in the evening

Answer: 2) in the afternoon

The questionnaire No: 121

*PART B: Nighttime open space usage:*

**3. Frequency: How often do you visit these spaces during nighttime?**

1. very often - every day
2. often - once or twice per week
3. rarely - one or twice per month
4. almost never

Answer: 4) almost never

**4. Duration: How much time do you usually spend in these places during nighttime?**

1. more than 1 hour
2. around 30 minutes
3. 10-15 minutes
4. couple of minutes

Answer: 3) 10-15 minutes

**5. Activity: What type of activities do you engage in these spaces during nighttime?**

1. leisure and socialization- hanging out with friends or walking the dog
2. recreation - walking, running, cycling, exercise
3. relaxing by myself
4. just passing through
5. Other / walking the dog

Answer: 4) just passing through

**6. When spending time in open space during nighttime what is the most important spatial feature that influence the position and means of usage?**

1. urban furniture and pedestrian/bicycle paths
2. greenery and water proximity
3. Lightning
4. Other: \_\_\_\_\_

Answer: Other: monuments

**7. Are you satisfied with the position and overall quality of artificial lightning in these spaces?**  
(Choose grade from 1 to 5; 1-not at all, 5-very satisfied)

Answer: 3

**8. Do you feel comfortable and safe in these spaces during nighttime?**

1. Yes
2. No

Answer: Yes

The questionnaire No: 122

Are you conducting a survey and or interview?

1. Yes
2. No

Answer: Yes

You have been asked to complete this survey as part of scientific research "*Increasing the livability of open public space during nighttime: the importance of lightning in the waterfront areas*". The study is designed to determine the usage dynamics of the waterfront area. Your responses are entirely voluntary, and you may refuse to complete any part or all of this survey. This survey is designed to be anonymous, meaning that there should be no way to connect your responses with you. Toward that end, please do not sign your name to the survey, or include any information in your responses that makes it easy to identify you. By completing and submitting the survey, you affirm that you are at least 18 years old and that you give your consent to use your answers in this research.

*General information:*

Age:

1. 18-25;
2. 25-40;
3. 40-55;
4. 55+

Answer: 40-55

Gender

1. Female
2. Male

Answer: Male

*PART A: Open space usage:*

**1. Do you use open public space in the waterfront area?**

1. Yes
2. No

Answer: No

**2. Time period: When do you use these spaces the most?**

1. in the morning
2. in the afternoon
3. in the evening/during nighttime
4. other: in the morning and in the evening

Answer: 1) in the morning

The questionnaire No: 122

*PART B: Nighttime open space usage:*

**3. Frequency: How often do you visit these spaces during nighttime?**

1. very often - every day
2. often - once or twice per week
3. rarely - one or twice per month
4. almost never

Answer: 3) rarely - one or twice per month

**4. Duration: How much time do you usually spend in these places during nighttime?**

1. more than 1 hour
2. around 30 minutes
3. 10-15 minutes
4. couple of minutes

Answer: 2) around 30 minutes

**5. Activity: What type of activities do you engage in these spaces during nighttime?**

1. leisure and socialization- hanging out with friends or walking the dog
2. recreation - walking, running, cycling, exercise
3. relaxing by myself
4. just passing through
5. Other / walking the dog

Answer: 3) relaxing by myself

**6. When spending time in open space during nighttime what is the most important spatial feature that influence the position and means of usage?**

1. urban furniture and pedestrian/bicycle paths
2. greenery and water proximity
3. Lightning
4. Other: \_\_\_\_\_

Answer: Other: river restaurants

**7. Are you satisfied with the position and overall quality of artificial lightning in these spaces?**  
(Choose grade from 1 to 5; 1-not at all, 5-very satisfied)

Answer: 1

**8. Do you feel comfortable and safe in these spaces during nighttime?**

1. Yes
2. No

Answer: Yes

The questionnaire No: 123

Are you conducting a survey and or interview?

1. Yes
2. No

Answer: Yes

You have been asked to complete this survey as part of scientific research "*Increasing the livability of open public space during nighttime: the importance of lightning in the waterfront areas*". The study is designed to determine the usage dynamics of the waterfront area. Your responses are entirely voluntary, and you may refuse to complete any part or all of this survey. This survey is designed to be anonymous, meaning that there should be no way to connect your responses with you. Toward that end, please do not sign your name to the survey, or include any information in your responses that makes it easy to identify you. By completing and submitting the survey, you affirm that you are at least 18 years old and that you give your consent to use your answers in this research.

*General information:*

Age:

1. 18-25;
2. 25-40;
3. 40-55;
4. 55+

Answer: 25-40

Gender

1. Female
2. Male

Answer: Male

*PART A: Open space usage:*

**1. Do you use open public space in the waterfront area?**

1. Yes
2. No

Answer: No

**2. Time period: When do you use these spaces the most?**

1. in the morning
2. in the afternoon
3. in the evening/during nighttime
4. other: in the morning and in the evening

Answer: 3) in the evening/during nighttime

The questionnaire No: 123

*PART B: Nighttime open space usage:*

**3. Frequency: How often do you visit these spaces during nighttime?**

1. very often - every day
2. often - once or twice per week
3. rarely - one or twice per month
4. almost never

Answer: 3) rarely - one or twice per month

**4. Duration: How much time do you usually spend in these places during nighttime?**

1. more than 1 hour
2. around 30 minutes
3. 10-15 minutes
4. couple of minutes

Answer: 2) around 30 minutes

**5. Activity: What type of activities do you engage in these spaces during nighttime?**

1. leisure and socialization- hanging out with friends or walking the dog
2. recreation - walking, running, cycling, exercise
3. relaxing by myself
4. just passing through
5. Other / walking the dog

Answer: 3) relaxing by myself

**6. When spending time in open space during nighttime what is the most important spatial feature that influence the position and means of usage?**

1. urban furniture and pedestrian/bicycle paths
2. greenery and water proximity
3. Lightning
4. Other: \_\_\_\_\_

Answer: 2) greenery and water proximity

**7. Are you satisfied with the position and overall quality of artificial lightning in these spaces?**

(Choose grade from 1 to 5; 1-not at all, 5-very satisfied)

Answer: 1

**8. Do you feel comfortable and safe in these spaces during nighttime?**

1. Yes
2. No

Answer: No

The questionnaire No: 124

Are you conducting a survey and or interview?

1. Yes
2. No

Answer: Yes

You have been asked to complete this survey as part of scientific research "*Increasing the livability of open public space during nighttime: the importance of lightning in the waterfront areas*". The study is designed to determine the usage dynamics of the waterfront area. Your responses are entirely voluntary, and you may refuse to complete any part or all of this survey. This survey is designed to be anonymous, meaning that there should be no way to connect your responses with you. Toward that end, please do not sign your name to the survey, or include any information in your responses that makes it easy to identify you. By completing and submitting the survey, you affirm that you are at least 18 years old and that you give your consent to use your answers in this research.

*General information:*

Age:

1. 18-25;
2. 25-40;
3. 40-55;
4. 55+

Answer: 40-55

Gender

1. Female
2. Male

Answer: Male

*PART A: Open space usage:*

**1. Do you use open public space in the waterfront area?**

1. Yes
2. No

Answer: Yes

**2. Time period: When do you use these spaces the most?**

1. in the morning
2. in the afternoon
3. in the evening/during nighttime
4. other: in the morning and in the evening

Answer: 4) other: in the morning and in the evening

The questionnaire No: 124

*PART B: Nighttime open space usage:*

**3. Frequency: How often do you visit these spaces during nighttime?**

1. very often - every day
2. often - once or twice per week
3. rarely - one or twice per month
4. almost never

Answer: 4) almost never

**4. Duration: How much time do you usually spend in these places during nighttime?**

1. more than 1 hour
2. around 30 minutes
3. 10-15 minutes
4. couple of minutes

Answer: 1) more than 1 hour

**5. Activity: What type of activities do you engage in these spaces during nighttime?**

1. leisure and socialization- hanging out with friends or walking the dog
2. recreation - walking, running, cycling, exercise
3. relaxing by myself
4. just passing through
5. Other / walking the dog

Answer: 4) just passing through

**6. When spending time in open space during nighttime what is the most important spatial feature that influence the position and means of usage?**

1. urban furniture and pedestrian/bicycle paths
2. greenery and water proximity
3. Lightning
4. Other: \_\_\_\_\_

Answer: Other: river restaurants

**7. Are you satisfied with the position and overall quality of artificial lightning in these spaces?**  
(Choose grade from 1 to 5; 1-not at all, 5-very satisfied)

Answer: 1

**8. Do you feel comfortable and safe in these spaces during nighttime?**

1. Yes
2. No

Answer: No

The questionnaire No: 125

Are you conducting a survey and or interview?

1. Yes
2. No

Answer: Yes

You have been asked to complete this survey as part of scientific research "*Increasing the livability of open public space during nighttime: the importance of lightning in the waterfront areas*". The study is designed to determine the usage dynamics of the waterfront area. Your responses are entirely voluntary, and you may refuse to complete any part or all of this survey. This survey is designed to be anonymous, meaning that there should be no way to connect your responses with you. Toward that end, please do not sign your name to the survey, or include any information in your responses that makes it easy to identify you. By completing and submitting the survey, you affirm that you are at least 18 years old and that you give your consent to use your answers in this research.

*General information:*

Age:

1. 18-25;
2. 25-40;
3. 40-55;
4. 55+

Answer: 25-40

Gender

1. Female
2. Male

Answer: Female

*PART A: Open space usage:*

**1. Do you use open public space in the waterfront area?**

1. Yes
2. No

Answer: Yes

**2. Time period: When do you use these spaces the most?**

1. in the morning
2. in the afternoon
3. in the evening/during nighttime
4. other: in the morning and in the evening

Answer: 2) in the afternoon

*PART B: Nighttime open space usage:*

**3. Frequency: How often do you visit these spaces during nighttime?**

1. very often - every day
2. often - once or twice per week
3. rarely - one or twice per month
4. almost never

Answer: 2) often - once or twice per week

**4. Duration: How much time do you usually spend in these places during nighttime?**

1. more than 1 hour
2. around 30 minutes
3. 10-15 minutes
4. couple of minutes

Answer: 2) around 30 minutes

**5. Activity: What type of activities do you engage in these spaces during nighttime?**

1. leisure and socialization- hanging out with friends or walking the dog
2. recreation - walking, running, cycling, exercise
3. relaxing by myself
4. just passing through
5. Other / walking the dog

Answer: 1) leisure and socialization- hangingt out with friends or walking the dog

**6. When spending time in open space during nighttime what is the most important spatial feature that influence the position and means of usage?**

1. urban furniture and pedestrian/bicycle paths
2. greenery and water proximity
3. Lightning
4. Other: \_\_\_\_\_

Answer: 3) Lightning

**7. Are you satisfied with the position and overall quality of artificial lightning in these spaces?**

(Choose grade from 1 to 5; 1-not at all, 5-very satisfied)

Answer: 2

**8. Do you feel comfortable and safe in these spaces during nighttime?**

1. Yes
2. No

Answer: No

The questionnaire No: 126

Are you conducting a survey and or interview?

1. Yes
2. No

Answer: Yes

You have been asked to complete this survey as part of scientific research "*Increasing the livability of open public space during nighttime: the importance of lightning in the waterfront areas*". The study is designed to determine the usage dynamics of the waterfront area. Your responses are entirely voluntary, and you may refuse to complete any part or all of this survey. This survey is designed to be anonymous, meaning that there should be no way to connect your responses with you. Toward that end, please do not sign your name to the survey, or include any information in your responses that makes it easy to identify you. By completing and submitting the survey, you affirm that you are at least 18 years old and that you give your consent to use your answers in this research.

*General information:*

Age:

1. 18-25;
2. 25-40;
3. 40-55;
4. 55+

Answer: 18-25

Gender

1. Female
2. Male

Answer: Male

*PART A: Open space usage:*

**1. Do you use open public space in the waterfront area?**

1. Yes
2. No

Answer: Yes

**2. Time period: When do you use these spaces the most?**

1. in the morning
2. in the afternoon
3. in the evening/during nighttime
4. other: in the morning and in the evening

Answer: 1) in the morning

*PART B: Nighttime open space usage:*

**3. Frequency: How often do you visit these spaces during nighttime?**

1. very often - every day
2. often - once or twice per week
3. rarely - one or twice per month
4. almost never

Answer: 4) almost never

**4. Duration: How much time do you usually spend in these places during nighttime?**

1. more than 1 hour
2. around 30 minutes
3. 10-15 minutes
4. couple of minutes

Answer: 1) more than 1 hour

**5. Activity: What type of activities do you engage in these spaces during nighttime?**

1. leisure and socialization- hanging out with friends or walking the dog
2. recreation - walking, running, cycling, exercise
3. relaxing by myself
4. just passing through
5. Other / walking the dog

Answer: 3) relaxing by myself

**6. When spending time in open space during nighttime what is the most important spatial feature that influence the position and means of usage?**

1. urban furniture and pedestrian/bicycle paths
2. greenery and water proximity
3. Lightning
4. Other: \_\_\_\_\_

Answer: 3) Lightning

**7. Are you satisfied with the position and overall quality of artificial lightning in these spaces?**  
(Choose grade from 1 to 5; 1-not at all, 5-very satisfied)

Answer: 2

**8. Do you feel comfortable and safe in these spaces during nighttime?**

1. Yes
2. No

Answer: Yes

The questionnaire No: 127

Are you conducting a survey and or interview?

1. Yes
2. No

Answer: Yes

You have been asked to complete this survey as part of scientific research "*Increasing the livability of open public space during nighttime: the importance of lightning in the waterfront areas*". The study is designed to determine the usage dynamics of the waterfront area. Your responses are entirely voluntary, and you may refuse to complete any part or all of this survey. This survey is designed to be anonymous, meaning that there should be no way to connect your responses with you. Toward that end, please do not sign your name to the survey, or include any information in your responses that makes it easy to identify you. By completing and submitting the survey, you affirm that you are at least 18 years old and that you give your consent to use your answers in this research.

*General information:*

Age:

1. 18-25;
2. 25-40;
3. 40-55;
4. 55+

Answer: 18-25

Gender

1. Female
2. Male

Answer: Male

*PART A: Open space usage:*

**1. Do you use open public space in the waterfront area?**

1. Yes
2. No

Answer: Yes

**2. Time period: When do you use these spaces the most?**

1. in the morning
2. in the afternoon
3. in the evening/during nighttime
4. other: in the morning and in the evening

Answer: 2) in the afternoon

*PART B: Nighttime open space usage:*

**3. Frequency: How often do you visit these spaces during nighttime?**

1. very often - every day
2. often - once or twice per week
3. rarely - one or twice per month
4. almost never

Answer: 2) often - once or twice per week

**4. Duration: How much time do you usually spend in these places during nighttime?**

1. more than 1 hour
2. around 30 minutes
3. 10-15 minutes
4. couple of minutes

Answer: 1) more than 1 hour

**5. Activity: What type of activities do you engage in these spaces during nighttime?**

1. leisure and socialization- hanging out with friends or walking the dog
2. recreation - walking, running, cycling, exercise
3. relaxing by myself
4. just passing through
5. Other / walking the dog

Answer: 1) leisure and socialization- hangingt out with friends or walking the dog

**6. When spending time in open space during nighttime what is the most important spatial feature that influence the position and means of usage?**

1. urban furniture and pedestrian/bicycle paths
2. greenery and water proximity
3. Lightning
4. Other: \_\_\_\_\_

Answer: Other: river restaurants

**7. Are you satisfied with the position and overall quality of artificial lightning in these spaces?**  
(Choose grade from 1 to 5; 1-not at all, 5-very satisfied)

Answer: 1

**8. Do you feel comfortable and safe in these spaces during nighttime?**

1. Yes
2. No

Answer: No

The questionnaire No: 128

Are you conducting a survey and or interview?

1. Yes
2. No

Answer: Yes

You have been asked to complete this survey as part of scientific research "*Increasing the livability of open public space during nighttime: the importance of lightning in the waterfront areas*". The study is designed to determine the usage dynamics of the waterfront area. Your responses are entirely voluntary, and you may refuse to complete any part or all of this survey. This survey is designed to be anonymous, meaning that there should be no way to connect your responses with you. Toward that end, please do not sign your name to the survey, or include any information in your responses that makes it easy to identify you. By completing and submitting the survey, you affirm that you are at least 18 years old and that you give your consent to use your answers in this research.

*General information:*

Age:

1. 18-25;
2. 25-40;
3. 40-55;
4. 55+

Answer: 40-55

Gender

1. Female
2. Male

Answer: Female

*PART A: Open space usage:*

**1. Do you use open public space in the waterfront area?**

1. Yes
2. No

Answer: No

**2. Time period: When do you use these spaces the most?**

1. in the morning
2. in the afternoon
3. in the evening/during nighttime
4. other: in the morning and in the evening

Answer: 4) other: in the morning and in the evening

*PART B: Nighttime open space usage:*

**3. Frequency: How often do you visit these spaces during nighttime?**

1. very often - every day
2. often - once or twice per week
3. rarely - one or twice per month
4. almost never

Answer: 2) often - once or twice per week

**4. Duration: How much time do you usually spend in these places during nighttime?**

1. more than 1 hour
2. around 30 minutes
3. 10-15 minutes
4. couple of minutes

Answer: 2) around 30 minutes

**5. Activity: What type of activities do you engage in these spaces during nighttime?**

1. leisure and socialization- hanging out with friends or walking the dog
2. recreation - walking, running, cycling, exercise
3. relaxing by myself
4. just passing through
5. Other / walking the dog

Answer: 1) leisure and socialization- hangingt out with friends or walking the dog

**6. When spending time in open space during nighttime what is the most important spatial feature that influence the position and means of usage?**

1. urban furniture and pedestrian/bicycle paths
2. greenery and water proximity
3. Lightning
4. Other: \_\_\_\_\_

Answer: Other: monuments

**7. Are you satisfied with the position and overall quality of artificial lightning in these spaces?**

(Choose grade from 1 to 5; 1-not at all, 5-very satisfied)

Answer: 2

**8. Do you feel comfortable and safe in these spaces during nighttime?**

1. Yes
2. No

Answer: No

The questionnaire No: 129

Are you conducting a survey and or interview?

1. Yes
2. No

Answer: Yes

You have been asked to complete this survey as part of scientific research "*Increasing the livability of open public space during nighttime: the importance of lightning in the waterfront areas*". The study is designed to determine the usage dynamics of the waterfront area. Your responses are entirely voluntary, and you may refuse to complete any part or all of this survey. This survey is designed to be anonymous, meaning that there should be no way to connect your responses with you. Toward that end, please do not sign your name to the survey, or include any information in your responses that makes it easy to identify you. By completing and submitting the survey, you affirm that you are at least 18 years old and that you give your consent to use your answers in this research.

*General information:*

Age:

1. 18-25;
2. 25-40;
3. 40-55;
4. 55+

Answer: 55+

Gender

1. Female
2. Male

Answer: Female

*PART A: Open space usage:*

**1. Do you use open public space in the waterfront area?**

1. Yes
2. No

Answer: Yes

**2. Time period: When do you use these spaces the most?**

1. in the morning
2. in the afternoon
3. in the evening/during nighttime
4. other: in the morning and in the evening

Answer: 2) in the afternoon

*PART B: Nighttime open space usage:*

**3. Frequency: How often do you visit these spaces during nighttime?**

1. very often - every day
2. often - once or twice per week
3. rarely - one or twice per month
4. almost never

Answer: 3) rarely - one or twice per month

**4. Duration: How much time do you usually spend in these places during nighttime?**

1. more than 1 hour
2. around 30 minutes
3. 10-15 minutes
4. couple of minutes

Answer: 2) around 30 minutes

**5. Activity: What type of activities do you engage in these spaces during nighttime?**

1. leisure and socialization- hanging out with friends or walking the dog
2. recreation - walking, running, cycling, exercise
3. relaxing by myself
4. just passing through
5. Other / walking the dog

Answer: 1) leisure and socialization- hangingt out with friends or walking the dog

**6. When spending time in open space during nighttime what is the most important spatial feature that influence the position and means of usage?**

1. urban furniture and pedestrian/bicycle paths
2. greenery and water proximity
3. Lightning
4. Other: \_\_\_\_\_

Answer: Other: monuments

**7. Are you satisfied with the position and overall quality of artificial lightning in these spaces?**  
(Choose grade from 1 to 5; 1-not at all, 5-very satisfied)

Answer: 1

**8. Do you feel comfortable and safe in these spaces during nighttime?**

1. Yes
2. No

Answer: No

The questionnaire No: 130

Are you conducting a survey and or interview?

1. Yes
2. No

Answer: Yes

You have been asked to complete this survey as part of scientific research "*Increasing the livability of open public space during nighttime: the importance of lightning in the waterfront areas*". The study is designed to determine the usage dynamics of the waterfront area. Your responses are entirely voluntary, and you may refuse to complete any part or all of this survey. This survey is designed to be anonymous, meaning that there should be no way to connect your responses with you. Toward that end, please do not sign your name to the survey, or include any information in your responses that makes it easy to identify you. By completing and submitting the survey, you affirm that you are at least 18 years old and that you give your consent to use your answers in this research.

*General information:*

Age:

1. 18-25;
2. 25-40;
3. 40-55;
4. 55+

Answer: 25-40

Gender

1. Female
2. Male

Answer: Male

*PART A: Open space usage:*

**1. Do you use open public space in the waterfront area?**

1. Yes
2. No

Answer: Yes

**2. Time period: When do you use these spaces the most?**

1. in the morning
2. in the afternoon
3. in the evening/during nighttime
4. other: in the morning and in the evening

Answer: 3) in the evening/during nighttime

The questionnaire No: 130

*PART B: Nighttime open space usage:*

**3. Frequency: How often do you visit these spaces during nighttime?**

1. very often - every day
2. often - once or twice per week
3. rarely - one or twice per month
4. almost never

Answer: 2) often - once or twice per week

**4. Duration: How much time do you usually spend in these places during nighttime?**

1. more than 1 hour
2. around 30 minutes
3. 10-15 minutes
4. couple of minutes

Answer: 2) around 30 minutes

**5. Activity: What type of activities do you engage in these spaces during nighttime?**

1. leisure and socialization- hanging out with friends or walking the dog
2. recreation - walking, running, cycling, exercise
3. relaxing by myself
4. just passing through
5. Other / walking the dog

Answer: 3) relaxing by myself

**6. When spending time in open space during nighttime what is the most important spatial feature that influence the position and means of usage?**

1. urban furniture and pedestrian/bicycle paths
2. greenery and water proximity
3. Lightning
4. Other: \_\_\_\_\_

Answer: Other: river restaurants

**7. Are you satisfied with the position and overall quality of artificial lightning in these spaces?**  
(Choose grade from 1 to 5; 1-not at all, 5-very satisfied)

Answer: 1

**8. Do you feel comfortable and safe in these spaces during nighttime?**

1. Yes
2. No

Answer: Yes

The questionnaire No: 131

Are you conducting a survey and or interview?

1. Yes
2. No

Answer: Yes

You have been asked to complete this survey as part of scientific research "*Increasing the livability of open public space during nighttime: the importance of lightning in the waterfront areas*". The study is designed to determine the usage dynamics of the waterfront area. Your responses are entirely voluntary, and you may refuse to complete any part or all of this survey. This survey is designed to be anonymous, meaning that there should be no way to connect your responses with you. Toward that end, please do not sign your name to the survey, or include any information in your responses that makes it easy to identify you. By completing and submitting the survey, you affirm that you are at least 18 years old and that you give your consent to use your answers in this research.

*General information:*

Age:

1. 18-25;
2. 25-40;
3. 40-55;
4. 55+

Answer: 25-40

Gender

1. Female
2. Male

Answer: Male

*PART A: Open space usage:*

**1. Do you use open public space in the waterfront area?**

1. Yes
2. No

Answer: Yes

**2. Time period: When do you use these spaces the most?**

1. in the morning
2. in the afternoon
3. in the evening/during nighttime
4. other: in the morning and in the evening

Answer: 2) in the afternoon

The questionnaire No: 131

*PART B: Nighttime open space usage:*

**3. Frequency: How often do you visit these spaces during nighttime?**

1. very often - every day
2. often - once or twice per week
3. rarely - one or twice per month
4. almost never

Answer: 3) rarely - one or twice per month

**4. Duration: How much time do you usually spend in these places during nighttime?**

1. more than 1 hour
2. around 30 minutes
3. 10-15 minutes
4. couple of minutes

Answer: 2) around 30 minutes

**5. Activity: What type of activities do you engage in these spaces during nighttime?**

1. leisure and socialization- hanging out with friends or walking the dog
2. recreation - walking, running, cycling, exercise
3. relaxing by myself
4. just passing through
5. Other / walking the dog

Answer: 1) leisure and socialization- hangingt out with friends or walking the dog

**6. When spending time in open space during nighttime what is the most important spatial feature that influence the position and means of usage?**

1. urban furniture and pedestrian/bicycle paths
2. greenery and water proximity
3. Lightning
4. Other: \_\_\_\_\_

Answer: 3) Lightning

**7. Are you satisfied with the position and overall quality of artificial lightning in these spaces?**

(Choose grade from 1 to 5; 1-not at all, 5-very satisfied)

Answer: 3

**8. Do you feel comfortable and safe in these spaces during nighttime?**

1. Yes
2. No

Answer: Yes

The questionnaire No: 132

Are you conducting a survey and or interview?

1. Yes
2. No

Answer: Yes

You have been asked to complete this survey as part of scientific research "*Increasing the livability of open public space during nighttime: the importance of lightning in the waterfront areas*". The study is designed to determine the usage dynamics of the waterfront area. Your responses are entirely voluntary, and you may refuse to complete any part or all of this survey. This survey is designed to be anonymous, meaning that there should be no way to connect your responses with you. Toward that end, please do not sign your name to the survey, or include any information in your responses that makes it easy to identify you. By completing and submitting the survey, you affirm that you are at least 18 years old and that you give your consent to use your answers in this research.

*General information:*

Age:

1. 18-25;
2. 25-40;
3. 40-55;
4. 55+

Answer: 18-25

Gender

1. Female
2. Male

Answer: Male

*PART A: Open space usage:*

**1. Do you use open public space in the waterfront area?**

1. Yes
2. No

Answer: Yes

**2. Time period: When do you use these spaces the most?**

1. in the morning
2. in the afternoon
3. in the evening/during nighttime
4. other: in the morning and in the evening

Answer: 3) in the evening/during nighttime

*PART B: Nighttime open space usage:*

**3. Frequency: How often do you visit these spaces during nighttime?**

1. very often - every day
2. often - once or twice per week
3. rarely - one or twice per month
4. almost never

Answer: 4) almost never

**4. Duration: How much time do you usually spend in these places during nighttime?**

1. more than 1 hour
2. around 30 minutes
3. 10-15 minutes
4. couple of minutes

Answer: 2) around 30 minutes

**5. Activity: What type of activities do you engage in these spaces during nighttime?**

1. leisure and socialization- hanging out with friends or walking the dog
2. recreation - walking, running, cycling, exercise
3. relaxing by myself
4. just passing through
5. Other / walking the dog

Answer: 1) leisure and socialization- hangingt out with friends or walking the dog

**6. When spending time in open space during nighttime what is the most important spatial feature that influence the position and means of usage?**

1. urban furniture and pedestrian/bicycle paths
2. greenery and water proximity
3. Lightning
4. Other: \_\_\_\_\_

Answer: 3) Lightning

**7. Are you satisfied with the position and overall quality of artificial lightning in these spaces?**  
(Choose grade from 1 to 5; 1-not at all, 5-very satisfied)

Answer: 3

**8. Do you feel comfortable and safe in these spaces during nighttime?**

1. Yes
2. No

Answer: No

The questionnaire No: 133

Are you conducting a survey and or interview?

1. Yes
2. No

Answer: Yes

You have been asked to complete this survey as part of scientific research "*Increasing the livability of open public space during nighttime: the importance of lightning in the waterfront areas*". The study is designed to determine the usage dynamics of the waterfront area. Your responses are entirely voluntary, and you may refuse to complete any part or all of this survey. This survey is designed to be anonymous, meaning that there should be no way to connect your responses with you. Toward that end, please do not sign your name to the survey, or include any information in your responses that makes it easy to identify you. By completing and submitting the survey, you affirm that you are at least 18 years old and that you give your consent to use your answers in this research.

*General information:*

Age:

1. 18-25;
2. 25-40;
3. 40-55;
4. 55+

Answer: 40-55

Gender

1. Female
2. Male

Answer: Female

*PART A: Open space usage:*

**1. Do you use open public space in the waterfront area?**

1. Yes
2. No

Answer: Yes

**2. Time period: When do you use these spaces the most?**

1. in the morning
2. in the afternoon
3. in the evening/during nighttime
4. other: in the morning and in the evening

Answer: 3) in the evening/during nighttime

*PART B: Nighttime open space usage:*

**3. Frequency: How often do you visit these spaces during nighttime?**

1. very often - every day
2. often - once or twice per week
3. rarely - one or twice per month
4. almost never

Answer: 4) almost never

**4. Duration: How much time do you usually spend in these places during nighttime?**

1. more than 1 hour
2. around 30 minutes
3. 10-15 minutes
4. couple of minutes

Answer: 1) more than 1 hour

**5. Activity: What type of activities do you engage in these spaces during nighttime?**

1. leisure and socialization- hanging out with friends or walking the dog
2. recreation - walking, running, cycling, exercise
3. relaxing by myself
4. just passing through
5. Other / walking the dog

Answer: 4) just passing through

**6. When spending time in open space during nighttime what is the most important spatial feature that influence the position and means of usage?**

1. urban furniture and pedestrian/bicycle paths
2. greenery and water proximity
3. Lightning
4. Other: \_\_\_\_\_

Answer: 2) greenery and water proximity

**7. Are you satisfied with the position and overall quality of artificial lightning in these spaces?**  
(Choose grade from 1 to 5; 1-not at all, 5-very satisfied)

Answer: 4

**8. Do you feel comfortable and safe in these spaces during nighttime?**

1. Yes
2. No

Answer: No

The questionnaire No: 134

Are you conducting a survey and or interview?

1. Yes
2. No

Answer: Yes

You have been asked to complete this survey as part of scientific research "*Increasing the livability of open public space during nighttime: the importance of lightning in the waterfront areas*". The study is designed to determine the usage dynamics of the waterfront area. Your responses are entirely voluntary, and you may refuse to complete any part or all of this survey. This survey is designed to be anonymous, meaning that there should be no way to connect your responses with you. Toward that end, please do not sign your name to the survey, or include any information in your responses that makes it easy to identify you. By completing and submitting the survey, you affirm that you are at least 18 years old and that you give your consent to use your answers in this research.

*General information:*

Age:

1. 18-25;
2. 25-40;
3. 40-55;
4. 55+

Answer: 25-40

Gender

1. Female
2. Male

Answer: Female

*PART A: Open space usage:*

**1. Do you use open public space in the waterfront area?**

1. Yes
2. No

Answer: Yes

**2. Time period: When do you use these spaces the most?**

1. in the morning
2. in the afternoon
3. in the evening/during nighttime
4. other: in the morning and in the evening

Answer: 2) in the afternoon

The questionnaire No: 134

*PART B: Nighttime open space usage:*

**3. Frequency: How often do you visit these spaces during nighttime?**

1. very often - every day
2. often - once or twice per week
3. rarely - one or twice per month
4. almost never

Answer: 2) often - once or twice per week

**4. Duration: How much time do you usually spend in these places during nighttime?**

1. more than 1 hour
2. around 30 minutes
3. 10-15 minutes
4. couple of minutes

Answer: 1) more than 1 hour

**5. Activity: What type of activities do you engage in these spaces during nighttime?**

1. leisure and socialization- hanging out with friends or walking the dog
2. recreation - walking, running, cycling, exercise
3. relaxing by myself
4. just passing through
5. Other / walking the dog

Answer: 3) relaxing by myself

**6. When spending time in open space during nighttime what is the most important spatial feature that influence the position and means of usage?**

1. urban furniture and pedestrian/bicycle paths
2. greenery and water proximity
3. Lightning
4. Other: \_\_\_\_\_

Answer: 1) urban furniture and pedestrian/bicycle paths

**7. Are you satisfied with the position and overall quality of artificial lightning in these spaces?**  
(Choose grade from 1 to 5; 1-not at all, 5-very satisfied)

Answer: 5

**8. Do you feel comfortable and safe in these spaces during nighttime?**

1. Yes
2. No

Answer: Yes

The questionnaire No: 135

Are you conducting a survey and or interview?

1. Yes
2. No

Answer: Yes

You have been asked to complete this survey as part of scientific research "*Increasing the livability of open public space during nighttime: the importance of lightning in the waterfront areas*". The study is designed to determine the usage dynamics of the waterfront area. Your responses are entirely voluntary, and you may refuse to complete any part or all of this survey. This survey is designed to be anonymous, meaning that there should be no way to connect your responses with you. Toward that end, please do not sign your name to the survey, or include any information in your responses that makes it easy to identify you. By completing and submitting the survey, you affirm that you are at least 18 years old and that you give your consent to use your answers in this research.

*General information:*

Age:

1. 18-25;
2. 25-40;
3. 40-55;
4. 55+

Answer: 18-25

Gender

1. Female
2. Male

Answer: Female

*PART A: Open space usage:*

**1. Do you use open public space in the waterfront area?**

1. Yes
2. No

Answer: Yes

**2. Time period: When do you use these spaces the most?**

1. in the morning
2. in the afternoon
3. in the evening/during nighttime
4. other: in the morning and in the evening

Answer: 1) in the morning

*PART B: Nighttime open space usage:*

**3. Frequency: How often do you visit these spaces during nighttime?**

1. very often - every day
2. often - once or twice per week
3. rarely - one or twice per month
4. almost never

Answer: 2) often - once or twice per week

**4. Duration: How much time do you usually spend in these places during nighttime?**

1. more than 1 hour
2. around 30 minutes
3. 10-15 minutes
4. couple of minutes

Answer: 3) 10-15 minutes

**5. Activity: What type of activities do you engage in these spaces during nighttime?**

1. leisure and socialization- hanging out with friends or walking the dog
2. recreation - walking, running, cycling, exercise
3. relaxing by myself
4. just passing through
5. Other / walking the dog

Answer: 1) leisure and socialization- hangingt out with friends or walking the dog

**6. When spending time in open space during nighttime what is the most important spatial feature that influence the position and means of usage?**

1. urban furniture and pedestrian/bicycle paths
2. greenery and water proximity
3. Lightning
4. Other: \_\_\_\_\_

Answer: 1) urban furniture and pedestrian/bicycle paths

**7. Are you satisfied with the position and overall quality of artificial lightning in these spaces?**  
(Choose grade from 1 to 5; 1-not at all, 5-very satisfied)

Answer: 2

**8. Do you feel comfortable and safe in these spaces during nighttime?**

1. Yes
2. No

Answer: Yes

The questionnaire No: 136

Are you conducting a survey and or interview?

1. Yes
2. No

Answer: Yes

You have been asked to complete this survey as part of scientific research "*Increasing the livability of open public space during nighttime: the importance of lightning in the waterfront areas*". The study is designed to determine the usage dynamics of the waterfront area. Your responses are entirely voluntary, and you may refuse to complete any part or all of this survey. This survey is designed to be anonymous, meaning that there should be no way to connect your responses with you. Toward that end, please do not sign your name to the survey, or include any information in your responses that makes it easy to identify you. By completing and submitting the survey, you affirm that you are at least 18 years old and that you give your consent to use your answers in this research.

*General information:*

Age:

1. 18-25;
2. 25-40;
3. 40-55;
4. 55+

Answer: 18-25

Gender

1. Female
2. Male

Answer: Male

*PART A: Open space usage:*

**1. Do you use open public space in the waterfront area?**

1. Yes
2. No

Answer: No

**2. Time period: When do you use these spaces the most?**

1. in the morning
2. in the afternoon
3. in the evening/during nighttime
4. other: in the morning and in the evening

Answer: 3) in the evening/during nighttime

*PART B: Nighttime open space usage:*

**3. Frequency: How often do you visit these spaces during nighttime?**

1. very often - every day
2. often - once or twice per week
3. rarely - one or twice per month
4. almost never

Answer: 3) rarely - one or twice per month

**4. Duration: How much time do you usually spend in these places during nighttime?**

1. more than 1 hour
2. around 30 minutes
3. 10-15 minutes
4. couple of minutes

Answer: 2) around 30 minutes

**5. Activity: What type of activities do you engage in these spaces during nighttime?**

1. leisure and socialization- hanging out with friends or walking the dog
2. recreation - walking, running, cycling, exercise
3. relaxing by myself
4. just passing through
5. Other / walking the dog

Answer: 2) recreation - walking, running, cycling, exercise

**6. When spending time in open space during nighttime what is the most important spatial feature that influence the position and means of usage?**

1. urban furniture and pedestrian/bicycle paths
2. greenery and water proximity
3. Lightning
4. Other: \_\_\_\_\_

Answer: 3) Lightning

**7. Are you satisfied with the position and overall quality of artificial lightning in these spaces?**  
(Choose grade from 1 to 5; 1-not at all, 5-very satisfied)

Answer: 3

**8. Do you feel comfortable and safe in these spaces during nighttime?**

1. Yes
2. No

Answer: Yes

The questionnaire No: 137

Are you conducting a survey and or interview?

1. Yes
2. No

Answer: Yes

You have been asked to complete this survey as part of scientific research "*Increasing the livability of open public space during nighttime: the importance of lightning in the waterfront areas*". The study is designed to determine the usage dynamics of the waterfront area. Your responses are entirely voluntary, and you may refuse to complete any part or all of this survey. This survey is designed to be anonymous, meaning that there should be no way to connect your responses with you. Toward that end, please do not sign your name to the survey, or include any information in your responses that makes it easy to identify you. By completing and submitting the survey, you affirm that you are at least 18 years old and that you give your consent to use your answers in this research.

*General information:*

Age:

1. 18-25;
2. 25-40;
3. 40-55;
4. 55+

Answer: 40-55

Gender

1. Female
2. Male

Answer: Male

*PART A: Open space usage:*

**1. Do you use open public space in the waterfront area?**

1. Yes
2. No

Answer: Yes

**2. Time period: When do you use these spaces the most?**

1. in the morning
2. in the afternoon
3. in the evening/during nighttime
4. other: in the morning and in the evening

Answer: 4) other: in the morning and in the evening

*PART B: Nighttime open space usage:*

**3. Frequency: How often do you visit these spaces during nighttime?**

1. very often - every day
2. often - once or twice per week
3. rarely - one or twice per month
4. almost never

Answer: 1) very often - every day

**4. Duration: How much time do you usually spend in these places during nighttime?**

1. more than 1 hour
2. around 30 minutes
3. 10-15 minutes
4. couple of minutes

Answer: 2) around 30 minutes

**5. Activity: What type of activities do you engage in these spaces during nighttime?**

1. leisure and socialization- hanging out with friends or walking the dog
2. recreation - walking, running, cycling, exercise
3. relaxing by myself
4. just passing through
5. Other / walking the dog

Answer: 2) recreation - walking, running, cycling, exercise

**6. When spending time in open space during nighttime what is the most important spatial feature that influence the position and means of usage?**

1. urban furniture and pedestrian/bicycle paths
2. greenery and water proximity
3. Lightning
4. Other: \_\_\_\_\_

Answer: Other: river restaurants

**7. Are you satisfied with the position and overall quality of artificial lightning in these spaces?**  
(Choose grade from 1 to 5; 1-not at all, 5-very satisfied)

Answer: 3

**8. Do you feel comfortable and safe in these spaces during nighttime?**

1. Yes
2. No

Answer: No

The questionnaire No: 138

Are you conducting a survey and or interview?

1. Yes
2. No

Answer: Yes

You have been asked to complete this survey as part of scientific research "*Increasing the livability of open public space during nighttime: the importance of lightning in the waterfront areas*". The study is designed to determine the usage dynamics of the waterfront area. Your responses are entirely voluntary, and you may refuse to complete any part or all of this survey. This survey is designed to be anonymous, meaning that there should be no way to connect your responses with you. Toward that end, please do not sign your name to the survey, or include any information in your responses that makes it easy to identify you. By completing and submitting the survey, you affirm that you are at least 18 years old and that you give your consent to use your answers in this research.

*General information:*

Age:

1. 18-25;
2. 25-40;
3. 40-55;
4. 55+

Answer: 25-40

Gender

1. Female
2. Male

Answer: Male

*PART A: Open space usage:*

**1. Do you use open public space in the waterfront area?**

1. Yes
2. No

Answer: Yes

**2. Time period: When do you use these spaces the most?**

1. in the morning
2. in the afternoon
3. in the evening/during nighttime
4. other: in the morning and in the evening

Answer: 1) in the morning

The questionnaire No: 138

*PART B: Nighttime open space usage:*

**3. Frequency: How often do you visit these spaces during nighttime?**

1. very often - every day
2. often - once or twice per week
3. rarely - one or twice per month
4. almost never

Answer: 3) rarely - one or twice per month

**4. Duration: How much time do you usually spend in these places during nighttime?**

1. more than 1 hour
2. around 30 minutes
3. 10-15 minutes
4. couple of minutes

Answer: 3) 10-15 minutes

**5. Activity: What type of activities do you engage in these spaces during nighttime?**

1. leisure and socialization- hanging out with friends or walking the dog
2. recreation - walking, running, cycling, exercise
3. relaxing by myself
4. just passing through
5. Other / walking the dog

Answer: 2) recreation - walking, running, cycling, exercise

**6. When spending time in open space during nighttime what is the most important spatial feature that influence the position and means of usage?**

1. urban furniture and pedestrian/bicycle paths
2. greenery and water proximity
3. Lightning
4. Other: \_\_\_\_\_

Answer: Other: river restaurants

**7. Are you satisfied with the position and overall quality of artificial lightning in these spaces?**  
(Choose grade from 1 to 5; 1-not at all, 5-very satisfied)

Answer: 3

**8. Do you feel comfortable and safe in these spaces during nighttime?**

1. Yes
2. No

Answer: Yes

The questionnaire No: 139

Are you conducting a survey and or interview?

1. Yes
2. No

Answer: Yes

You have been asked to complete this survey as part of scientific research "*Increasing the livability of open public space during nighttime: the importance of lightning in the waterfront areas*". The study is designed to determine the usage dynamics of the waterfront area. Your responses are entirely voluntary, and you may refuse to complete any part or all of this survey. This survey is designed to be anonymous, meaning that there should be no way to connect your responses with you. Toward that end, please do not sign your name to the survey, or include any information in your responses that makes it easy to identify you. By completing and submitting the survey, you affirm that you are at least 18 years old and that you give your consent to use your answers in this research.

*General information:*

Age:

1. 18-25;
2. 25-40;
3. 40-55;
4. 55+

Answer: 25-40

Gender

1. Female
2. Male

Answer: Male

*PART A: Open space usage:*

**1. Do you use open public space in the waterfront area?**

1. Yes
2. No

Answer: Yes

**2. Time period: When do you use these spaces the most?**

1. in the morning
2. in the afternoon
3. in the evening/during nighttime
4. other: in the morning and in the evening

Answer: 2) in the afternoon

*PART B: Nighttime open space usage:*

**3. Frequency: How often do you visit these spaces during nighttime?**

1. very often - every day
2. often - once or twice per week
3. rarely - one or twice per month
4. almost never

Answer: 4) almost never

**4. Duration: How much time do you usually spend in these places during nighttime?**

1. more than 1 hour
2. around 30 minutes
3. 10-15 minutes
4. couple of minutes

Answer: 1) more than 1 hour

**5. Activity: What type of activities do you engage in these spaces during nighttime?**

1. leisure and socialization- hanging out with friends or walking the dog
2. recreation - walking, running, cycling, exercise
3. relaxing by myself
4. just passing through
5. Other / walking the dog

Answer: 1) leisure and socialization- hangingt out with friends or walking the dog

**6. When spending time in open space during nighttime what is the most important spatial feature that influence the position and means of usage?**

1. urban furniture and pedestrian/bicycle paths
2. greenery and water proximity
3. Lightning
4. Other: \_\_\_\_\_

Answer: 2) greenery and water proximity

**7. Are you satisfied with the position and overall quality of artificial lightning in these spaces?**  
(Choose grade from 1 to 5; 1-not at all, 5-very satisfied)

Answer: 5

**8. Do you feel comfortable and safe in these spaces during nighttime?**

1. Yes
2. No

Answer: No

The questionnaire No: 140

Are you conducting a survey and or interview?

1. Yes
2. No

Answer: Yes

You have been asked to complete this survey as part of scientific research "*Increasing the livability of open public space during nighttime: the importance of lightning in the waterfront areas*". The study is designed to determine the usage dynamics of the waterfront area. Your responses are entirely voluntary, and you may refuse to complete any part or all of this survey. This survey is designed to be anonymous, meaning that there should be no way to connect your responses with you. Toward that end, please do not sign your name to the survey, or include any information in your responses that makes it easy to identify you. By completing and submitting the survey, you affirm that you are at least 18 years old and that you give your consent to use your answers in this research.

*General information:*

Age:

1. 18-25;
2. 25-40;
3. 40-55;
4. 55+

Answer: 25-40

Gender

1. Female
2. Male

Answer: Female

*PART A: Open space usage:*

**1. Do you use open public space in the waterfront area?**

1. Yes
2. No

Answer: Yes

**2. Time period: When do you use these spaces the most?**

1. in the morning
2. in the afternoon
3. in the evening/during nighttime
4. other: in the morning and in the evening

Answer: 4) other: in the morning and in the evening

*PART B: Nighttime open space usage:*

**3. Frequency: How often do you visit these spaces during nighttime?**

1. very often - every day
2. often - once or twice per week
3. rarely - one or twice per month
4. almost never

Answer: 2) often - once or twice per week

**4. Duration: How much time do you usually spend in these places during nighttime?**

1. more than 1 hour
2. around 30 minutes
3. 10-15 minutes
4. couple of minutes

Answer: 2) around 30 minutes

**5. Activity: What type of activities do you engage in these spaces during nighttime?**

1. leisure and socialization- hanging out with friends or walking the dog
2. recreation - walking, running, cycling, exercise
3. relaxing by myself
4. just passing through
5. Other / walking the dog

Answer: 1) leisure and socialization- hangingt out with friends or walking the dog

**6. When spending time in open space during nighttime what is the most important spatial feature that influence the position and means of usage?**

1. urban furniture and pedestrian/bicycle paths
2. greenery and water proximity
3. Lightning
4. Other: \_\_\_\_\_

Answer: 2) greenery and water proximity

**7. Are you satisfied with the position and overall quality of artificial lightning in these spaces?**

(Choose grade from 1 to 5; 1-not at all, 5-very satisfied)

Answer: 3

**8. Do you feel comfortable and safe in these spaces during nighttime?**

1. Yes
2. No

Answer: No

The questionnaire No: 141

Are you conducting a survey and or interview?

1. Yes
2. No

Answer: Yes

You have been asked to complete this survey as part of scientific research "*Increasing the livability of open public space during nighttime: the importance of lightning in the waterfront areas*". The study is designed to determine the usage dynamics of the waterfront area. Your responses are entirely voluntary, and you may refuse to complete any part or all of this survey. This survey is designed to be anonymous, meaning that there should be no way to connect your responses with you. Toward that end, please do not sign your name to the survey, or include any information in your responses that makes it easy to identify you. By completing and submitting the survey, you affirm that you are at least 18 years old and that you give your consent to use your answers in this research.

*General information:*

Age:

1. 18-25;
2. 25-40;
3. 40-55;
4. 55+

Answer: 25-40

Gender

1. Female
2. Male

Answer: Female

*PART A: Open space usage:*

**1. Do you use open public space in the waterfront area?**

1. Yes
2. No

Answer: No

**2. Time period: When do you use these spaces the most?**

1. in the morning
2. in the afternoon
3. in the evening/during nighttime
4. other: in the morning and in the evening

Answer: 1) in the morning

The questionnaire No: 141

*PART B: Nighttime open space usage:*

**3. Frequency: How often do you visit these spaces during nighttime?**

1. very often - every day
2. often - once or twice per week
3. rarely - one or twice per month
4. almost never

Answer: 3) rarely - one or twice per month

**4. Duration: How much time do you usually spend in these places during nighttime?**

1. more than 1 hour
2. around 30 minutes
3. 10-15 minutes
4. couple of minutes

Answer: 3) 10-15 minutes

**5. Activity: What type of activities do you engage in these spaces during nighttime?**

1. leisure and socialization- hanging out with friends or walking the dog
2. recreation - walking, running, cycling, exercise
3. relaxing by myself
4. just passing through
5. Other / walking the dog

Answer: 1) leisure and socialization- hangingt out with friends or walking the dog

**6. When spending time in open space during nighttime what is the most important spatial feature that influence the position and means of usage?**

1. urban furniture and pedestrian/bicycle paths
2. greenery and water proximity
3. Lightning
4. Other: \_\_\_\_\_

Answer: 2) greenery and water proximity

**7. Are you satisfied with the position and overall quality of artificial lightning in these spaces?**  
(Choose grade from 1 to 5; 1-not at all, 5-very satisfied)

Answer: 4

**8. Do you feel comfortable and safe in these spaces during nighttime?**

1. Yes
2. No

Answer: No

The questionnaire No: 142

Are you conducting a survey and or interview?

1. Yes
2. No

Answer: Yes

You have been asked to complete this survey as part of scientific research "*Increasing the livability of open public space during nighttime: the importance of lightning in the waterfront areas*". The study is designed to determine the usage dynamics of the waterfront area. Your responses are entirely voluntary, and you may refuse to complete any part or all of this survey. This survey is designed to be anonymous, meaning that there should be no way to connect your responses with you. Toward that end, please do not sign your name to the survey, or include any information in your responses that makes it easy to identify you. By completing and submitting the survey, you affirm that you are at least 18 years old and that you give your consent to use your answers in this research.

*General information:*

Age:

1. 18-25;
2. 25-40;
3. 40-55;
4. 55+

Answer: 40-55

Gender

1. Female
2. Male

Answer: Male

*PART A: Open space usage:*

**1. Do you use open public space in the waterfront area?**

1. Yes
2. No

Answer: No

**2. Time period: When do you use these spaces the most?**

1. in the morning
2. in the afternoon
3. in the evening/during nighttime
4. other: in the morning and in the evening

Answer: 4) other: in the morning and in the evening

The questionnaire No: 142

*PART B: Nighttime open space usage:*

**3. Frequency: How often do you visit these spaces during nighttime?**

1. very often - every day
2. often - once or twice per week
3. rarely - one or twice per month
4. almost never

Answer: 2) often - once or twice per week

**4. Duration: How much time do you usually spend in these places during nighttime?**

1. more than 1 hour
2. around 30 minutes
3. 10-15 minutes
4. couple of minutes

Answer: 4) couple of minutes

**5. Activity: What type of activities do you engage in these spaces during nighttime?**

1. leisure and socialization- hanging out with friends or walking the dog
2. recreation - walking, running, cycling, exercise
3. relaxing by myself
4. just passing through
5. Other / walking the dog

Answer: 4) just passing through

**6. When spending time in open space during nighttime what is the most important spatial feature that influence the position and means of usage?**

1. urban furniture and pedestrian/bicycle paths
2. greenery and water proximity
3. Lightning
4. Other: \_\_\_\_\_

Answer: 2) greenery and water proximity

**7. Are you satisfied with the position and overall quality of artificial lightning in these spaces?**  
(Choose grade from 1 to 5; 1-not at all, 5-very satisfied)

Answer: 3

**8. Do you feel comfortable and safe in these spaces during nighttime?**

1. Yes
2. No

Answer: Yes

The questionnaire No: 143

Are you conducting a survey and or interview?

1. Yes
2. No

Answer: Yes

You have been asked to complete this survey as part of scientific research "*Increasing the livability of open public space during nighttime: the importance of lightning in the waterfront areas*". The study is designed to determine the usage dynamics of the waterfront area. Your responses are entirely voluntary, and you may refuse to complete any part or all of this survey. This survey is designed to be anonymous, meaning that there should be no way to connect your responses with you. Toward that end, please do not sign your name to the survey, or include any information in your responses that makes it easy to identify you. By completing and submitting the survey, you affirm that you are at least 18 years old and that you give your consent to use your answers in this research.

*General information:*

Age:

1. 18-25;
2. 25-40;
3. 40-55;
4. 55+

Answer: 55+

Gender

1. Female
2. Male

Answer: Female

*PART A: Open space usage:*

**1. Do you use open public space in the waterfront area?**

1. Yes
2. No

Answer: Yes

**2. Time period: When do you use these spaces the most?**

1. in the morning
2. in the afternoon
3. in the evening/during nighttime
4. other: in the morning and in the evening

Answer: 1) in the morning

The questionnaire No: 143

*PART B: Nighttime open space usage:*

**3. Frequency: How often do you visit these spaces during nighttime?**

1. very often - every day
2. often - once or twice per week
3. rarely - one or twice per month
4. almost never

Answer: 4) almost never

**4. Duration: How much time do you usually spend in these places during nighttime?**

1. more than 1 hour
2. around 30 minutes
3. 10-15 minutes
4. couple of minutes

Answer: 1) more than 1 hour

**5. Activity: What type of activities do you engage in these spaces during nighttime?**

1. leisure and socialization- hanging out with friends or walking the dog
2. recreation - walking, running, cycling, exercise
3. relaxing by myself
4. just passing through
5. Other / walking the dog

Answer: 1) leisure and socialization- hangingt out with friends or walking the dog

**6. When spending time in open space during nighttime what is the most important spatial feature that influence the position and means of usage?**

1. urban furniture and pedestrian/bicycle paths
2. greenery and water proximity
3. Lightning
4. Other: \_\_\_\_\_

Answer: 3) Lightning

**7. Are you satisfied with the position and overall quality of artificial lightning in these spaces?**  
(Choose grade from 1 to 5; 1-not at all, 5-very satisfied)

Answer: 3

**8. Do you feel comfortable and safe in these spaces during nighttime?**

1. Yes
2. No

Answer: Yes

The questionnaire No: 144

Are you conducting a survey and or interview?

1. Yes
2. No

Answer: Yes

You have been asked to complete this survey as part of scientific research "*Increasing the livability of open public space during nighttime: the importance of lightning in the waterfront areas*". The study is designed to determine the usage dynamics of the waterfront area. Your responses are entirely voluntary, and you may refuse to complete any part or all of this survey. This survey is designed to be anonymous, meaning that there should be no way to connect your responses with you. Toward that end, please do not sign your name to the survey, or include any information in your responses that makes it easy to identify you. By completing and submitting the survey, you affirm that you are at least 18 years old and that you give your consent to use your answers in this research.

*General information:*

Age:

1. 18-25;
2. 25-40;
3. 40-55;
4. 55+

Answer: 40-55

Gender

1. Female
2. Male

Answer: Male

*PART A: Open space usage:*

**1. Do you use open public space in the waterfront area?**

1. Yes
2. No

Answer: No

**2. Time period: When do you use these spaces the most?**

1. in the morning
2. in the afternoon
3. in the evening/during nighttime
4. other: in the morning and in the evening

Answer: 1) in the morning

The questionnaire No: 144

*PART B: Nighttime open space usage:*

**3. Frequency: How often do you visit these spaces during nighttime?**

1. very often - every day
2. often - once or twice per week
3. rarely - one or twice per month
4. almost never

Answer: 3) rarely - one or twice per month

**4. Duration: How much time do you usually spend in these places during nighttime?**

1. more than 1 hour
2. around 30 minutes
3. 10-15 minutes
4. couple of minutes

Answer: 2) around 30 minutes

**5. Activity: What type of activities do you engage in these spaces during nighttime?**

1. leisure and socialization- hanging out with friends or walking the dog
2. recreation - walking, running, cycling, exercise
3. relaxing by myself
4. just passing through
5. Other / walking the dog

Answer: 1) leisure and socialization- hangingt out with friends or walking the dog

**6. When spending time in open space during nighttime what is the most important spatial feature that influence the position and means of usage?**

1. urban furniture and pedestrian/bicycle paths
2. greenery and water proximity
3. Lightning
4. Other: \_\_\_\_\_

Answer: 3) Lightning

**7. Are you satisfied with the position and overall quality of artificial lightning in these spaces?**

(Choose grade from 1 to 5; 1-not at all, 5-very satisfied)

Answer: 4

**8. Do you feel comfortable and safe in these spaces during nighttime?**

1. Yes
2. No

Answer: Yes

The questionnaire No: 145

Are you conducting a survey and or interview?

1. Yes
2. No

Answer: Yes

You have been asked to complete this survey as part of scientific research "*Increasing the livability of open public space during nighttime: the importance of lightning in the waterfront areas*". The study is designed to determine the usage dynamics of the waterfront area. Your responses are entirely voluntary, and you may refuse to complete any part or all of this survey. This survey is designed to be anonymous, meaning that there should be no way to connect your responses with you. Toward that end, please do not sign your name to the survey, or include any information in your responses that makes it easy to identify you. By completing and submitting the survey, you affirm that you are at least 18 years old and that you give your consent to use your answers in this research.

*General information:*

Age:

1. 18-25;
2. 25-40;
3. 40-55;
4. 55+

Answer: 40-55

Gender

1. Female
2. Male

Answer: Female

*PART A: Open space usage:*

**1. Do you use open public space in the waterfront area?**

1. Yes
2. No

Answer: No

**2. Time period: When do you use these spaces the most?**

1. in the morning
2. in the afternoon
3. in the evening/during nighttime
4. other: in the morning and in the evening

Answer: 2) in the afternoon

*PART B: Nighttime open space usage:*

**3. Frequency: How often do you visit these spaces during nighttime?**

1. very often - every day
2. often - once or twice per week
3. rarely - one or twice per month
4. almost never

Answer: 2) often - once or twice per week

**4. Duration: How much time do you usually spend in these places during nighttime?**

1. more than 1 hour
2. around 30 minutes
3. 10-15 minutes
4. couple of minutes

Answer: 1) more than 1 hour

**5. Activity: What type of activities do you engage in these spaces during nighttime?**

1. leisure and socialization- hanging out with friends or walking the dog
2. recreation - walking, running, cycling, exercise
3. relaxing by myself
4. just passing through
5. Other / walking the dog

Answer: 1) leisure and socialization- hangingt out with friends or walking the dog

**6. When spending time in open space during nighttime what is the most important spatial feature that influence the position and means of usage?**

1. urban furniture and pedestrian/bicycle paths
2. greenery and water proximity
3. Lightning
4. Other: \_\_\_\_\_

Answer: 3) Lightning

**7. Are you satisfied with the position and overall quality of artificial lightning in these spaces?**

(Choose grade from 1 to 5; 1-not at all, 5-very satisfied)

Answer: 3

**8. Do you feel comfortable and safe in these spaces during nighttime?**

1. Yes
2. No

Answer: No

The questionnaire No: 146

Are you conducting a survey and or interview?

1. Yes
2. No

Answer: Yes

You have been asked to complete this survey as part of scientific research "*Increasing the livability of open public space during nighttime: the importance of lightning in the waterfront areas*". The study is designed to determine the usage dynamics of the waterfront area. Your responses are entirely voluntary, and you may refuse to complete any part or all of this survey. This survey is designed to be anonymous, meaning that there should be no way to connect your responses with you. Toward that end, please do not sign your name to the survey, or include any information in your responses that makes it easy to identify you. By completing and submitting the survey, you affirm that you are at least 18 years old and that you give your consent to use your answers in this research.

*General information:*

Age:

1. 18-25;
2. 25-40;
3. 40-55;
4. 55+

Answer: 25-40

Gender

1. Female
2. Male

Answer: Male

*PART A: Open space usage:*

**1. Do you use open public space in the waterfront area?**

1. Yes
2. No

Answer: Yes

**2. Time period: When do you use these spaces the most?**

1. in the morning
2. in the afternoon
3. in the evening/during nighttime
4. other: in the morning and in the evening

Answer: 4) other: in the morning and in the evening

*PART B: Nighttime open space usage:*

**3. Frequency: How often do you visit these spaces during nighttime?**

1. very often - every day
2. often - once or twice per week
3. rarely - one or twice per month
4. almost never

Answer: 3) rarely - one or twice per month

**4. Duration: How much time do you usually spend in these places during nighttime?**

1. more than 1 hour
2. around 30 minutes
3. 10-15 minutes
4. couple of minutes

Answer: 2) around 30 minutes

**5. Activity: What type of activities do you engage in these spaces during nighttime?**

1. leisure and socialization- hanging out with friends or walking the dog
2. recreation - walking, running, cycling, exercise
3. relaxing by myself
4. just passing through
5. Other / walking the dog

Answer: Other: walking the dog

**6. When spending time in open space during nighttime what is the most important spatial feature that influence the position and means of usage?**

1. urban furniture and pedestrian/bicycle paths
2. greenery and water proximity
3. Lightning
4. Other: \_\_\_\_\_

Answer: 3) Lightning

**7. Are you satisfied with the position and overall quality of artificial lightning in these spaces?**  
(Choose grade from 1 to 5; 1-not at all, 5-very satisfied)

Answer: 1

**8. Do you feel comfortable and safe in these spaces during nighttime?**

1. Yes
2. No

Answer: No

The questionnaire No: 147

Are you conducting a survey and or interview?

1. Yes
2. No

Answer: Yes

You have been asked to complete this survey as part of scientific research "*Increasing the livability of open public space during nighttime: the importance of lightning in the waterfront areas*". The study is designed to determine the usage dynamics of the waterfront area. Your responses are entirely voluntary, and you may refuse to complete any part or all of this survey. This survey is designed to be anonymous, meaning that there should be no way to connect your responses with you. Toward that end, please do not sign your name to the survey, or include any information in your responses that makes it easy to identify you. By completing and submitting the survey, you affirm that you are at least 18 years old and that you give your consent to use your answers in this research.

*General information:*

Age:

1. 18-25;
2. 25-40;
3. 40-55;
4. 55+

Answer: 55+

Gender

1. Female
2. Male

Answer: Male

*PART A: Open space usage:*

**1. Do you use open public space in the waterfront area?**

1. Yes
2. No

Answer: Yes

**2. Time period: When do you use these spaces the most?**

1. in the morning
2. in the afternoon
3. in the evening/during nighttime
4. other: in the morning and in the evening

Answer: 2) in the afternoon

*PART B: Nighttime open space usage:*

**3. Frequency: How often do you visit these spaces during nighttime?**

1. very often - every day
2. often - once or twice per week
3. rarely - one or twice per month
4. almost never

Answer: 3) rarely - one or twice per month

**4. Duration: How much time do you usually spend in these places during nighttime?**

1. more than 1 hour
2. around 30 minutes
3. 10-15 minutes
4. couple of minutes

Answer: 1) more than 1 hour

**5. Activity: What type of activities do you engage in these spaces during nighttime?**

1. leisure and socialization- hanging out with friends or walking the dog
2. recreation - walking, running, cycling, exercise
3. relaxing by myself
4. just passing through
5. Other / walking the dog

Answer: 2) recreation - walking, running, cycling, exercise

**6. When spending time in open space during nighttime what is the most important spatial feature that influence the position and means of usage?**

1. urban furniture and pedestrian/bicycle paths
2. greenery and water proximity
3. Lightning
4. Other: \_\_\_\_\_

Answer: 3) Lightning

**7. Are you satisfied with the position and overall quality of artificial lightning in these spaces?**  
(Choose grade from 1 to 5; 1-not at all, 5-very satisfied)

Answer: 3

**8. Do you feel comfortable and safe in these spaces during nighttime?**

1. Yes
2. No

Answer: Yes

The questionnaire No: 148

Are you conducting a survey and or interview?

1. Yes
2. No

Answer: Yes

You have been asked to complete this survey as part of scientific research "*Increasing the livability of open public space during nighttime: the importance of lightning in the waterfront areas*". The study is designed to determine the usage dynamics of the waterfront area. Your responses are entirely voluntary, and you may refuse to complete any part or all of this survey. This survey is designed to be anonymous, meaning that there should be no way to connect your responses with you. Toward that end, please do not sign your name to the survey, or include any information in your responses that makes it easy to identify you. By completing and submitting the survey, you affirm that you are at least 18 years old and that you give your consent to use your answers in this research.

*General information:*

Age:

1. 18-25;
2. 25-40;
3. 40-55;
4. 55+

Answer: 55+

Gender

1. Female
2. Male

Answer: Female

*PART A: Open space usage:*

**1. Do you use open public space in the waterfront area?**

1. Yes
2. No

Answer: Yes

**2. Time period: When do you use these spaces the most?**

1. in the morning
2. in the afternoon
3. in the evening/during nighttime
4. other: in the morning and in the evening

Answer: 3) in the evening/during nighttime

*PART B: Nighttime open space usage:*

**3. Frequency: How often do you visit these spaces during nighttime?**

1. very often - every day
2. often - once or twice per week
3. rarely - one or twice per month
4. almost never

Answer: 2) often - once or twice per week

**4. Duration: How much time do you usually spend in these places during nighttime?**

1. more than 1 hour
2. around 30 minutes
3. 10-15 minutes
4. couple of minutes

Answer: 3) 10-15 minutes

**5. Activity: What type of activities do you engage in these spaces during nighttime?**

1. leisure and socialization- hanging out with friends or walking the dog
2. recreation - walking, running, cycling, exercise
3. relaxing by myself
4. just passing through
5. Other / walking the dog

Answer: 2) recreation - walking, running, cycling, exercise

**6. When spending time in open space during nighttime what is the most important spatial feature that influence the position and means of usage?**

1. urban furniture and pedestrian/bicycle paths
2. greenery and water proximity
3. Lightning
4. Other: \_\_\_\_\_

Answer: 3) Lightning

**7. Are you satisfied with the position and overall quality of artificial lightning in these spaces?**  
(Choose grade from 1 to 5; 1-not at all, 5-very satisfied)

Answer: 3

**8. Do you feel comfortable and safe in these spaces during nighttime?**

1. Yes
2. No

Answer: No

The questionnaire No: 149

Are you conducting a survey and or interview?

1. Yes
2. No

Answer: Yes

You have been asked to complete this survey as part of scientific research "*Increasing the livability of open public space during nighttime: the importance of lightning in the waterfront areas*". The study is designed to determine the usage dynamics of the waterfront area. Your responses are entirely voluntary, and you may refuse to complete any part or all of this survey. This survey is designed to be anonymous, meaning that there should be no way to connect your responses with you. Toward that end, please do not sign your name to the survey, or include any information in your responses that makes it easy to identify you. By completing and submitting the survey, you affirm that you are at least 18 years old and that you give your consent to use your answers in this research.

*General information:*

Age:

1. 18-25;
2. 25-40;
3. 40-55;
4. 55+

Answer: 40-55

Gender

1. Female
2. Male

Answer: Male

*PART A: Open space usage:*

**1. Do you use open public space in the waterfront area?**

1. Yes
2. No

Answer: Yes

**2. Time period: When do you use these spaces the most?**

1. in the morning
2. in the afternoon
3. in the evening/during nighttime
4. other: in the morning and in the evening

Answer: 1) in the morning

*PART B: Nighttime open space usage:*

**3. Frequency: How often do you visit these spaces during nighttime?**

1. very often - every day
2. often - once or twice per week
3. rarely - one or twice per month
4. almost never

Answer: 4) almost never

**4. Duration: How much time do you usually spend in these places during nighttime?**

1. more than 1 hour
2. around 30 minutes
3. 10-15 minutes
4. couple of minutes

Answer: 3) 10-15 minutes

**5. Activity: What type of activities do you engage in these spaces during nighttime?**

1. leisure and socialization- hanging out with friends or walking the dog
2. recreation - walking, running, cycling, exercise
3. relaxing by myself
4. just passing through
5. Other / walking the dog

Answer: 1) leisure and socialization- hangingt out with friends or walking the dog

**6. When spending time in open space during nighttime what is the most important spatial feature that influence the position and means of usage?**

1. urban furniture and pedestrian/bicycle paths
2. greenery and water proximity
3. Lightning
4. Other: \_\_\_\_\_

Answer: Other: river restaurants

**7. Are you satisfied with the position and overall quality of artificial lightning in these spaces?**  
(Choose grade from 1 to 5; 1-not at all, 5-very satisfied)

Answer: 1

**8. Do you feel comfortable and safe in these spaces during nighttime?**

1. Yes
2. No

Answer: Yes

The questionnaire No: 150

Are you conducting a survey and or interview?

1. Yes
2. No

Answer: Yes

You have been asked to complete this survey as part of scientific research "*Increasing the livability of open public space during nighttime: the importance of lightning in the waterfront areas*". The study is designed to determine the usage dynamics of the waterfront area. Your responses are entirely voluntary, and you may refuse to complete any part or all of this survey. This survey is designed to be anonymous, meaning that there should be no way to connect your responses with you. Toward that end, please do not sign your name to the survey, or include any information in your responses that makes it easy to identify you. By completing and submitting the survey, you affirm that you are at least 18 years old and that you give your consent to use your answers in this research.

*General information:*

Age:

1. 18-25;
2. 25-40;
3. 40-55;
4. 55+

Answer: 25-40

Gender

1. Female
2. Male

Answer: Male

*PART A: Open space usage:*

**1. Do you use open public space in the waterfront area?**

1. Yes
2. No

Answer: No

**2. Time period: When do you use these spaces the most?**

1. in the morning
2. in the afternoon
3. in the evening/during nighttime
4. other: in the morning and in the evening

Answer: 2) in the afternoon

*PART B: Nighttime open space usage:*

**3. Frequency: How often do you visit these spaces during nighttime?**

1. very often - every day
2. often - once or twice per week
3. rarely - one or twice per month
4. almost never

Answer: 3) rarely - one or twice per month

**4. Duration: How much time do you usually spend in these places during nighttime?**

1. more than 1 hour
2. around 30 minutes
3. 10-15 minutes
4. couple of minutes

Answer: 1) more than 1 hour

**5. Activity: What type of activities do you engage in these spaces during nighttime?**

1. leisure and socialization- hanging out with friends or walking the dog
2. recreation - walking, running, cycling, exercise
3. relaxing by myself
4. just passing through
5. Other / walking the dog

Answer: 1) leisure and socialization- hangingt out with friends or walking the dog

**6. When spending time in open space during nighttime what is the most important spatial feature that influence the position and means of usage?**

1. urban furniture and pedestrian/bicycle paths
2. greenery and water proximity
3. Lightning
4. Other: \_\_\_\_\_

Answer: 2) greenery and water proximity

**7. Are you satisfied with the position and overall quality of artificial lightning in these spaces?**  
(Choose grade from 1 to 5; 1-not at all, 5-very satisfied)

Answer: 3

**8. Do you feel comfortable and safe in these spaces during nighttime?**

1. Yes
2. No

Answer: Yes

The questionnaire No: 151

Are you conducting a survey and or interview?

1. Yes
2. No

Answer: Yes

You have been asked to complete this survey as part of scientific research "*Increasing the livability of open public space during nighttime: the importance of lightning in the waterfront areas*". The study is designed to determine the usage dynamics of the waterfront area. Your responses are entirely voluntary, and you may refuse to complete any part or all of this survey. This survey is designed to be anonymous, meaning that there should be no way to connect your responses with you. Toward that end, please do not sign your name to the survey, or include any information in your responses that makes it easy to identify you. By completing and submitting the survey, you affirm that you are at least 18 years old and that you give your consent to use your answers in this research.

*General information:*

Age:

1. 18-25;
2. 25-40;
3. 40-55;
4. 55+

Answer: 40-55

Gender

1. Female
2. Male

Answer: Female

*PART A: Open space usage:*

**1. Do you use open public space in the waterfront area?**

1. Yes
2. No

Answer: Yes

**2. Time period: When do you use these spaces the most?**

1. in the morning
2. in the afternoon
3. in the evening/during nighttime
4. other: in the morning and in the evening

Answer: 4) other: in the morning and in the evening

*PART B: Nighttime open space usage:*

**3. Frequency: How often do you visit these spaces during nighttime?**

1. very often - every day
2. often - once or twice per week
3. rarely - one or twice per month
4. almost never

Answer: 3) rarely - one or twice per month

**4. Duration: How much time do you usually spend in these places during nighttime?**

1. more than 1 hour
2. around 30 minutes
3. 10-15 minutes
4. couple of minutes

Answer: 2) around 30 minutes

**5. Activity: What type of activities do you engage in these spaces during nighttime?**

1. leisure and socialization- hanging out with friends or walking the dog
2. recreation - walking, running, cycling, exercise
3. relaxing by myself
4. just passing through
5. Other / walking the dog

Answer: 1) leisure and socialization- hangingt out with friends or walking the dog

**6. When spending time in open space during nighttime what is the most important spatial feature that influence the position and means of usage?**

1. urban furniture and pedestrian/bicycle paths
2. greenery and water proximity
3. Lightning
4. Other: \_\_\_\_\_

Answer: 3) Lightning

**7. Are you satisfied with the position and overall quality of artificial lightning in these spaces?**  
(Choose grade from 1 to 5; 1-not at all, 5-very satisfied)

Answer: 3

**8. Do you feel comfortable and safe in these spaces during nighttime?**

1. Yes
2. No

Answer: No

The questionnaire No: 152

Are you conducting a survey and or interview?

1. Yes
2. No

Answer: Yes

You have been asked to complete this survey as part of scientific research "*Increasing the livability of open public space during nighttime: the importance of lightning in the waterfront areas*". The study is designed to determine the usage dynamics of the waterfront area. Your responses are entirely voluntary, and you may refuse to complete any part or all of this survey. This survey is designed to be anonymous, meaning that there should be no way to connect your responses with you. Toward that end, please do not sign your name to the survey, or include any information in your responses that makes it easy to identify you. By completing and submitting the survey, you affirm that you are at least 18 years old and that you give your consent to use your answers in this research.

*General information:*

Age:

1. 18-25;
2. 25-40;
3. 40-55;
4. 55+

Answer: 18-25

Gender

1. Female
2. Male

Answer: Female

*PART A: Open space usage:*

**1. Do you use open public space in the waterfront area?**

1. Yes
2. No

Answer: Yes

**2. Time period: When do you use these spaces the most?**

1. in the morning
2. in the afternoon
3. in the evening/during nighttime
4. other: in the morning and in the evening

Answer: 4) other: in the morning and in the evening

*PART B: Nighttime open space usage:*

**3. Frequency: How often do you visit these spaces during nighttime?**

1. very often - every day
2. often - once or twice per week
3. rarely - one or twice per month
4. almost never

Answer: 2) often - once or twice per week

**4. Duration: How much time do you usually spend in these places during nighttime?**

1. more than 1 hour
2. around 30 minutes
3. 10-15 minutes
4. couple of minutes

Answer: 2) around 30 minutes

**5. Activity: What type of activities do you engage in these spaces during nighttime?**

1. leisure and socialization- hanging out with friends or walking the dog
2. recreation - walking, running, cycling, exercise
3. relaxing by myself
4. just passing through
5. Other / walking the dog

Answer: 1) leisure and socialization- hangingt out with friends or walking the dog

**6. When spending time in open space during nighttime what is the most important spatial feature that influence the position and means of usage?**

1. urban furniture and pedestrian/bicycle paths
2. greenery and water proximity
3. Lightning
4. Other: \_\_\_\_\_

Answer: Other: monuments

**7. Are you satisfied with the position and overall quality of artificial lightning in these spaces?**

(Choose grade from 1 to 5; 1-not at all, 5-very satisfied)

Answer: 2

**8. Do you feel comfortable and safe in these spaces during nighttime?**

1. Yes
2. No

Answer: No

The questionnaire No: 153

Are you conducting a survey and or interview?

1. Yes
2. No

Answer: Yes

You have been asked to complete this survey as part of scientific research "*Increasing the livability of open public space during nighttime: the importance of lightning in the waterfront areas*". The study is designed to determine the usage dynamics of the waterfront area. Your responses are entirely voluntary, and you may refuse to complete any part or all of this survey. This survey is designed to be anonymous, meaning that there should be no way to connect your responses with you. Toward that end, please do not sign your name to the survey, or include any information in your responses that makes it easy to identify you. By completing and submitting the survey, you affirm that you are at least 18 years old and that you give your consent to use your answers in this research.

*General information:*

Age:

1. 18-25;
2. 25-40;
3. 40-55;
4. 55+

Answer: 18-25

Gender

1. Female
2. Male

Answer: Female

*PART A: Open space usage:*

**1. Do you use open public space in the waterfront area?**

1. Yes
2. No

Answer: Yes

**2. Time period: When do you use these spaces the most?**

1. in the morning
2. in the afternoon
3. in the evening/during nighttime
4. other: in the morning and in the evening

Answer: 3) in the evening/during nighttime

*PART B: Nighttime open space usage:*

**3. Frequency: How often do you visit these spaces during nighttime?**

1. very often - every day
2. often - once or twice per week
3. rarely - one or twice per month
4. almost never

Answer: 4) almost never

**4. Duration: How much time do you usually spend in these places during nighttime?**

1. more than 1 hour
2. around 30 minutes
3. 10-15 minutes
4. couple of minutes

Answer: 3) 10-15 minutes

**5. Activity: What type of activities do you engage in these spaces during nighttime?**

1. leisure and socialization- hanging out with friends or walking the dog
2. recreation - walking, running, cycling, exercise
3. relaxing by myself
4. just passing through
5. Other / walking the dog

Answer: 4) just passing through

**6. When spending time in open space during nighttime what is the most important spatial feature that influence the position and means of usage?**

1. urban furniture and pedestrian/bicycle paths
2. greenery and water proximity
3. Lightning
4. Other: \_\_\_\_\_

Answer: 2) greenery and water proximity

**7. Are you satisfied with the position and overall quality of artificial lightning in these spaces?**  
(Choose grade from 1 to 5; 1-not at all, 5-very satisfied)

Answer: 5

**8. Do you feel comfortable and safe in these spaces during nighttime?**

1. Yes
2. No

Answer: No

The questionnaire No: 154

Are you conducting a survey and or interview?

1. Yes
2. No

Answer: Yes

You have been asked to complete this survey as part of scientific research "*Increasing the livability of open public space during nighttime: the importance of lightning in the waterfront areas*". The study is designed to determine the usage dynamics of the waterfront area. Your responses are entirely voluntary, and you may refuse to complete any part or all of this survey. This survey is designed to be anonymous, meaning that there should be no way to connect your responses with you. Toward that end, please do not sign your name to the survey, or include any information in your responses that makes it easy to identify you. By completing and submitting the survey, you affirm that you are at least 18 years old and that you give your consent to use your answers in this research.

*General information:*

Age:

1. 18-25;
2. 25-40;
3. 40-55;
4. 55+

Answer: 18-25

Gender

1. Female
2. Male

Answer: Male

*PART A: Open space usage:*

**1. Do you use open public space in the waterfront area?**

1. Yes
2. No

Answer: Yes

**2. Time period: When do you use these spaces the most?**

1. in the morning
2. in the afternoon
3. in the evening/during nighttime
4. other: in the morning and in the evening

Answer: 4) other: in the morning and in the evening

*PART B: Nighttime open space usage:*

**3. Frequency: How often do you visit these spaces during nighttime?**

1. very often - every day
2. often - once or twice per week
3. rarely - one or twice per month
4. almost never

Answer: 2) often - once or twice per week

**4. Duration: How much time do you usually spend in these places during nighttime?**

1. more than 1 hour
2. around 30 minutes
3. 10-15 minutes
4. couple of minutes

Answer: 1) more than 1 hour

**5. Activity: What type of activities do you engage in these spaces during nighttime?**

1. leisure and socialization- hanging out with friends or walking the dog
2. recreation - walking, running, cycling, exercise
3. relaxing by myself
4. just passing through
5. Other / walking the dog

Answer: 1) leisure and socialization- hangingt out with friends or walking the dog

**6. When spending time in open space during nighttime what is the most important spatial feature that influence the position and means of usage?**

1. urban furniture and pedestrian/bicycle paths
2. greenery and water proximity
3. Lightning
4. Other: \_\_\_\_\_

Answer: 3) Lightning

**7. Are you satisfied with the position and overall quality of artificial lightning in these spaces?**  
(Choose grade from 1 to 5; 1-not at all, 5-very satisfied)

Answer: 2

**8. Do you feel comfortable and safe in these spaces during nighttime?**

1. Yes
2. No

Answer: Yes

The questionnaire No: 155

Are you conducting a survey and or interview?

1. Yes
2. No

Answer: Yes

You have been asked to complete this survey as part of scientific research "*Increasing the livability of open public space during nighttime: the importance of lightning in the waterfront areas*". The study is designed to determine the usage dynamics of the waterfront area. Your responses are entirely voluntary, and you may refuse to complete any part or all of this survey. This survey is designed to be anonymous, meaning that there should be no way to connect your responses with you. Toward that end, please do not sign your name to the survey, or include any information in your responses that makes it easy to identify you. By completing and submitting the survey, you affirm that you are at least 18 years old and that you give your consent to use your answers in this research.

*General information:*

Age:

1. 18-25;
2. 25-40;
3. 40-55;
4. 55+

Answer: 25-40

Gender

1. Female
2. Male

Answer: Male

*PART A: Open space usage:*

**1. Do you use open public space in the waterfront area?**

1. Yes
2. No

Answer: No

**2. Time period: When do you use these spaces the most?**

1. in the morning
2. in the afternoon
3. in the evening/during nighttime
4. other: in the morning and in the evening

Answer: 1) in the morning

*PART B: Nighttime open space usage:*

**3. Frequency: How often do you visit these spaces during nighttime?**

1. very often - every day
2. often - once or twice per week
3. rarely - one or twice per month
4. almost never

Answer: 2) often - once or twice per week

**4. Duration: How much time do you usually spend in these places during nighttime?**

1. more than 1 hour
2. around 30 minutes
3. 10-15 minutes
4. couple of minutes

Answer: 3) 10-15 minutes

**5. Activity: What type of activities do you engage in these spaces during nighttime?**

1. leisure and socialization- hanging out with friends or walking the dog
2. recreation - walking, running, cycling, exercise
3. relaxing by myself
4. just passing through
5. Other / walking the dog

Answer: 1) leisure and socialization- hangingt out with friends or walking the dog

**6. When spending time in open space during nighttime what is the most important spatial feature that influence the position and means of usage?**

1. urban furniture and pedestrian/bicycle paths
2. greenery and water proximity
3. Lightning
4. Other: \_\_\_\_\_

Answer: Other: monuments

**7. Are you satisfied with the position and overall quality of artificial lightning in these spaces?**

(Choose grade from 1 to 5; 1-not at all, 5-very satisfied)

Answer: 5

**8. Do you feel comfortable and safe in these spaces during nighttime?**

1. Yes
2. No

Answer: Yes

The questionnaire No: 156

Are you conducting a survey and or interview?

1. Yes
2. No

Answer: Yes

You have been asked to complete this survey as part of scientific research "*Increasing the livability of open public space during nighttime: the importance of lightning in the waterfront areas*". The study is designed to determine the usage dynamics of the waterfront area. Your responses are entirely voluntary, and you may refuse to complete any part or all of this survey. This survey is designed to be anonymous, meaning that there should be no way to connect your responses with you. Toward that end, please do not sign your name to the survey, or include any information in your responses that makes it easy to identify you. By completing and submitting the survey, you affirm that you are at least 18 years old and that you give your consent to use your answers in this research.

*General information:*

Age:

1. 18-25;
2. 25-40;
3. 40-55;
4. 55+

Answer: 25-40

Gender

1. Female
2. Male

Answer: Female

*PART A: Open space usage:*

**1. Do you use open public space in the waterfront area?**

1. Yes
2. No

Answer: Yes

**2. Time period: When do you use these spaces the most?**

1. in the morning
2. in the afternoon
3. in the evening/during nighttime
4. other: in the morning and in the evening

Answer: 2) in the afternoon

*PART B: Nighttime open space usage:*

**3. Frequency: How often do you visit these spaces during nighttime?**

1. very often - every day
2. often - once or twice per week
3. rarely - one or twice per month
4. almost never

Answer: 4) almost never

**4. Duration: How much time do you usually spend in these places during nighttime?**

1. more than 1 hour
2. around 30 minutes
3. 10-15 minutes
4. couple of minutes

Answer: 3) 10-15 minutes

**5. Activity: What type of activities do you engage in these spaces during nighttime?**

1. leisure and socialization- hanging out with friends or walking the dog
2. recreation - walking, running, cycling, exercise
3. relaxing by myself
4. just passing through
5. Other / walking the dog

Answer: 1) leisure and socialization- hangingt out with friends or walking the dog

**6. When spending time in open space during nighttime what is the most important spatial feature that influence the position and means of usage?**

1. urban furniture and pedestrian/bicycle paths
2. greenery and water proximity
3. Lightning
4. Other: \_\_\_\_\_

Answer: 1) urban furniture and pedestrian/bicycle paths

**7. Are you satisfied with the position and overall quality of artificial lightning in these spaces?**  
(Choose grade from 1 to 5; 1-not at all, 5-very satisfied)

Answer: 2

**8. Do you feel comfortable and safe in these spaces during nighttime?**

1. Yes
2. No

Answer: Yes

The questionnaire No: 157

Are you conducting a survey and or interview?

1. Yes
2. No

Answer: Yes

You have been asked to complete this survey as part of scientific research "*Increasing the livability of open public space during nighttime: the importance of lightning in the waterfront areas*". The study is designed to determine the usage dynamics of the waterfront area. Your responses are entirely voluntary, and you may refuse to complete any part or all of this survey. This survey is designed to be anonymous, meaning that there should be no way to connect your responses with you. Toward that end, please do not sign your name to the survey, or include any information in your responses that makes it easy to identify you. By completing and submitting the survey, you affirm that you are at least 18 years old and that you give your consent to use your answers in this research.

*General information:*

Age:

1. 18-25;
2. 25-40;
3. 40-55;
4. 55+

Answer: 25-40

Gender

1. Female
2. Male

Answer: Male

*PART A: Open space usage:*

**1. Do you use open public space in the waterfront area?**

1. Yes
2. No

Answer: Yes

**2. Time period: When do you use these spaces the most?**

1. in the morning
2. in the afternoon
3. in the evening/during nighttime
4. other: in the morning and in the evening

Answer: 3) in the evening/during nighttime

*PART B: Nighttime open space usage:*

**3. Frequency: How often do you visit these spaces during nighttime?**

1. very often - every day
2. often - once or twice per week
3. rarely - one or twice per month
4. almost never

Answer: 3) rarely - one or twice per month

**4. Duration: How much time do you usually spend in these places during nighttime?**

1. more than 1 hour
2. around 30 minutes
3. 10-15 minutes
4. couple of minutes

Answer: 1) more than 1 hour

**5. Activity: What type of activities do you engage in these spaces during nighttime?**

1. leisure and socialization- hanging out with friends or walking the dog
2. recreation - walking, running, cycling, exercise
3. relaxing by myself
4. just passing through
5. Other / walking the dog

Answer: 4) just passing through

**6. When spending time in open space during nighttime what is the most important spatial feature that influence the position and means of usage?**

1. urban furniture and pedestrian/bicycle paths
2. greenery and water proximity
3. Lightning
4. Other: \_\_\_\_\_

Answer: 3) Lightning

**7. Are you satisfied with the position and overall quality of artificial lightning in these spaces?**  
(Choose grade from 1 to 5; 1-not at all, 5-very satisfied)

Answer: 3

**8. Do you feel comfortable and safe in these spaces during nighttime?**

1. Yes
2. No

Answer: Yes

The questionnaire No: 158

Are you conducting a survey and or interview?

1. Yes
2. No

Answer: Yes

You have been asked to complete this survey as part of scientific research "*Increasing the livability of open public space during nighttime: the importance of lightning in the waterfront areas*". The study is designed to determine the usage dynamics of the waterfront area. Your responses are entirely voluntary, and you may refuse to complete any part or all of this survey. This survey is designed to be anonymous, meaning that there should be no way to connect your responses with you. Toward that end, please do not sign your name to the survey, or include any information in your responses that makes it easy to identify you. By completing and submitting the survey, you affirm that you are at least 18 years old and that you give your consent to use your answers in this research.

*General information:*

Age:

1. 18-25;
2. 25-40;
3. 40-55;
4. 55+

Answer: 40-55

Gender

1. Female
2. Male

Answer: Female

*PART A: Open space usage:*

**1. Do you use open public space in the waterfront area?**

1. Yes
2. No

Answer: Yes

**2. Time period: When do you use these spaces the most?**

1. in the morning
2. in the afternoon
3. in the evening/during nighttime
4. other: in the morning and in the evening

Answer: 2) in the afternoon

*PART B: Nighttime open space usage:*

**3. Frequency: How often do you visit these spaces during nighttime?**

1. very often - every day
2. often - once or twice per week
3. rarely - one or twice per month
4. almost never

Answer: 3) rarely - one or twice per month

**4. Duration: How much time do you usually spend in these places during nighttime?**

1. more than 1 hour
2. around 30 minutes
3. 10-15 minutes
4. couple of minutes

Answer: 1) more than 1 hour

**5. Activity: What type of activities do you engage in these spaces during nighttime?**

1. leisure and socialization- hanging out with friends or walking the dog
2. recreation - walking, running, cycling, exercise
3. relaxing by myself
4. just passing through
5. Other / walking the dog

Answer: 4) just passing through

**6. When spending time in open space during nighttime what is the most important spatial feature that influence the position and means of usage?**

1. urban furniture and pedestrian/bicycle paths
2. greenery and water proximity
3. Lightning
4. Other: \_\_\_\_\_

Answer: 1) urban furniture and pedestrian/bicycle paths

**7. Are you satisfied with the position and overall quality of artificial lightning in these spaces?**  
(Choose grade from 1 to 5; 1-not at all, 5-very satisfied)

Answer: 2

**8. Do you feel comfortable and safe in these spaces during nighttime?**

1. Yes
2. No

Answer: Yes

The questionnaire No: 159

Are you conducting a survey and or interview?

1. Yes
2. No

Answer: Yes

You have been asked to complete this survey as part of scientific research "*Increasing the livability of open public space during nighttime: the importance of lightning in the waterfront areas*". The study is designed to determine the usage dynamics of the waterfront area. Your responses are entirely voluntary, and you may refuse to complete any part or all of this survey. This survey is designed to be anonymous, meaning that there should be no way to connect your responses with you. Toward that end, please do not sign your name to the survey, or include any information in your responses that makes it easy to identify you. By completing and submitting the survey, you affirm that you are at least 18 years old and that you give your consent to use your answers in this research.

*General information:*

Age:

1. 18-25;
2. 25-40;
3. 40-55;
4. 55+

Answer: 55+

Gender

1. Female
2. Male

Answer: Female

*PART A: Open space usage:*

**1. Do you use open public space in the waterfront area?**

1. Yes
2. No

Answer: Yes

**2. Time period: When do you use these spaces the most?**

1. in the morning
2. in the afternoon
3. in the evening/during nighttime
4. other: in the morning and in the evening

Answer: 1) in the morning

*PART B: Nighttime open space usage:*

**3. Frequency: How often do you visit these spaces during nighttime?**

1. very often - every day
2. often - once or twice per week
3. rarely - one or twice per month
4. almost never

Answer: 3) rarely - one or twice per month

**4. Duration: How much time do you usually spend in these places during nighttime?**

1. more than 1 hour
2. around 30 minutes
3. 10-15 minutes
4. couple of minutes

Answer: 2) around 30 minutes

**5. Activity: What type of activities do you engage in these spaces during nighttime?**

1. leisure and socialization- hanging out with friends or walking the dog
2. recreation - walking, running, cycling, exercise
3. relaxing by myself
4. just passing through
5. Other / walking the dog

Answer: 3) relaxing by myself

**6. When spending time in open space during nighttime what is the most important spatial feature that influence the position and means of usage?**

1. urban furniture and pedestrian/bicycle paths
2. greenery and water proximity
3. Lightning
4. Other: \_\_\_\_\_

Answer: 2) greenery and water proximity

**7. Are you satisfied with the position and overall quality of artificial lightning in these spaces?**  
(Choose grade from 1 to 5; 1-not at all, 5-very satisfied)

Answer: 1

**8. Do you feel comfortable and safe in these spaces during nighttime?**

1. Yes
2. No

Answer: No

The questionnaire No: 160

Are you conducting a survey and or interview?

1. Yes
2. No

Answer: Yes

You have been asked to complete this survey as part of scientific research "*Increasing the livability of open public space during nighttime: the importance of lightning in the waterfront areas*". The study is designed to determine the usage dynamics of the waterfront area. Your responses are entirely voluntary, and you may refuse to complete any part or all of this survey. This survey is designed to be anonymous, meaning that there should be no way to connect your responses with you. Toward that end, please do not sign your name to the survey, or include any information in your responses that makes it easy to identify you. By completing and submitting the survey, you affirm that you are at least 18 years old and that you give your consent to use your answers in this research.

*General information:*

Age:

1. 18-25;
2. 25-40;
3. 40-55;
4. 55+

Answer: 25-40

Gender

1. Female
2. Male

Answer: Male

*PART A: Open space usage:*

**1. Do you use open public space in the waterfront area?**

1. Yes
2. No

Answer: Yes

**2. Time period: When do you use these spaces the most?**

1. in the morning
2. in the afternoon
3. in the evening/during nighttime
4. other: in the morning and in the evening

Answer: 4) other: in the morning and in the evening

*PART B: Nighttime open space usage:*

**3. Frequency: How often do you visit these spaces during nighttime?**

1. very often - every day
2. often - once or twice per week
3. rarely - one or twice per month
4. almost never

Answer: 1) very often - every day

**4. Duration: How much time do you usually spend in these places during nighttime?**

1. more than 1 hour
2. around 30 minutes
3. 10-15 minutes
4. couple of minutes

Answer: 1) more than 1 hour

**5. Activity: What type of activities do you engage in these spaces during nighttime?**

1. leisure and socialization- hanging out with friends or walking the dog
2. recreation - walking, running, cycling, exercise
3. relaxing by myself
4. just passing through
5. Other / walking the dog

Answer: Other: walking the dog

**6. When spending time in open space during nighttime what is the most important spatial feature that influence the position and means of usage?**

1. urban furniture and pedestrian/bicycle paths
2. greenery and water proximity
3. Lightning
4. Other: \_\_\_\_\_

Answer: 1) urban furniture and pedestrian/bicycle paths

**7. Are you satisfied with the position and overall quality of artificial lightning in these spaces?**  
(Choose grade from 1 to 5; 1-not at all, 5-very satisfied)

Answer: 3

**8. Do you feel comfortable and safe in these spaces during nighttime?**

1. Yes
2. No

Answer: No

The questionnaire No: 161

Are you conducting a survey and or interview?

1. Yes
2. No

Answer: Yes

You have been asked to complete this survey as part of scientific research "*Increasing the livability of open public space during nighttime: the importance of lightning in the waterfront areas*". The study is designed to determine the usage dynamics of the waterfront area. Your responses are entirely voluntary, and you may refuse to complete any part or all of this survey. This survey is designed to be anonymous, meaning that there should be no way to connect your responses with you. Toward that end, please do not sign your name to the survey, or include any information in your responses that makes it easy to identify you. By completing and submitting the survey, you affirm that you are at least 18 years old and that you give your consent to use your answers in this research.

*General information:*

Age:

1. 18-25;
2. 25-40;
3. 40-55;
4. 55+

Answer: 18-25

Gender

1. Female
2. Male

Answer: Female

*PART A: Open space usage:*

**1. Do you use open public space in the waterfront area?**

1. Yes
2. No

Answer: Yes

**2. Time period: When do you use these spaces the most?**

1. in the morning
2. in the afternoon
3. in the evening/during nighttime
4. other: in the morning and in the evening

Answer: 1) in the morning

The questionnaire No: 161

*PART B: Nighttime open space usage:*

**3. Frequency: How often do you visit these spaces during nighttime?**

1. very often - every day
2. often - once or twice per week
3. rarely - one or twice per month
4. almost never

Answer: 2) often - once or twice per week

**4. Duration: How much time do you usually spend in these places during nighttime?**

1. more than 1 hour
2. around 30 minutes
3. 10-15 minutes
4. couple of minutes

Answer: 1) more than 1 hour

**5. Activity: What type of activities do you engage in these spaces during nighttime?**

1. leisure and socialization- hanging out with friends or walking the dog
2. recreation - walking, running, cycling, exercise
3. relaxing by myself
4. just passing through
5. Other / walking the dog

Answer: 4) just passing through

**6. When spending time in open space during nighttime what is the most important spatial feature that influence the position and means of usage?**

1. urban furniture and pedestrian/bicycle paths
2. greenery and water proximity
3. Lightning
4. Other: \_\_\_\_\_

Answer: 2) greenery and water proximity

**7. Are you satisfied with the position and overall quality of artificial lightning in these spaces?**  
(Choose grade from 1 to 5; 1-not at all, 5-very satisfied)

Answer: 2

**8. Do you feel comfortable and safe in these spaces during nighttime?**

1. Yes
2. No

Answer: No

The questionnaire No: 162

Are you conducting a survey and or interview?

1. Yes
2. No

Answer: Yes

You have been asked to complete this survey as part of scientific research "*Increasing the livability of open public space during nighttime: the importance of lightning in the waterfront areas*". The study is designed to determine the usage dynamics of the waterfront area. Your responses are entirely voluntary, and you may refuse to complete any part or all of this survey. This survey is designed to be anonymous, meaning that there should be no way to connect your responses with you. Toward that end, please do not sign your name to the survey, or include any information in your responses that makes it easy to identify you. By completing and submitting the survey, you affirm that you are at least 18 years old and that you give your consent to use your answers in this research.

*General information:*

Age:

1. 18-25;
2. 25-40;
3. 40-55;
4. 55+

Answer: 25-40

Gender

1. Female
2. Male

Answer: Male

*PART A: Open space usage:*

**1. Do you use open public space in the waterfront area?**

1. Yes
2. No

Answer: Yes

**2. Time period: When do you use these spaces the most?**

1. in the morning
2. in the afternoon
3. in the evening/during nighttime
4. other: in the morning and in the evening

Answer: 2) in the afternoon

*PART B: Nighttime open space usage:*

**3. Frequency: How often do you visit these spaces during nighttime?**

1. very often - every day
2. often - once or twice per week
3. rarely - one or twice per month
4. almost never

Answer: 1) very often - every day

**4. Duration: How much time do you usually spend in these places during nighttime?**

1. more than 1 hour
2. around 30 minutes
3. 10-15 minutes
4. couple of minutes

Answer: 1) more than 1 hour

**5. Activity: What type of activities do you engage in these spaces during nighttime?**

1. leisure and socialization- hanging out with friends or walking the dog
2. recreation - walking, running, cycling, exercise
3. relaxing by myself
4. just passing through
5. Other / walking the dog

Answer: 1) leisure and socialization- hangingt out with friends or walking the dog

**6. When spending time in open space during nighttime what is the most important spatial feature that influence the position and means of usage?**

1. urban furniture and pedestrian/bicycle paths
2. greenery and water proximity
3. Lightning
4. Other: \_\_\_\_\_

Answer: 2) greenery and water proximity

**7. Are you satisfied with the position and overall quality of artificial lightning in these spaces?**  
(Choose grade from 1 to 5; 1-not at all, 5-very satisfied)

Answer: 5

**8. Do you feel comfortable and safe in these spaces during nighttime?**

1. Yes
2. No

Answer: No

The questionnaire No: 163

Are you conducting a survey and or interview?

1. Yes
2. No

Answer: Yes

You have been asked to complete this survey as part of scientific research "*Increasing the livability of open public space during nighttime: the importance of lightning in the waterfront areas*". The study is designed to determine the usage dynamics of the waterfront area. Your responses are entirely voluntary, and you may refuse to complete any part or all of this survey. This survey is designed to be anonymous, meaning that there should be no way to connect your responses with you. Toward that end, please do not sign your name to the survey, or include any information in your responses that makes it easy to identify you. By completing and submitting the survey, you affirm that you are at least 18 years old and that you give your consent to use your answers in this research.

*General information:*

Age:

1. 18-25;
2. 25-40;
3. 40-55;
4. 55+

Answer: 25-40

Gender

1. Female
2. Male

Answer: Male

*PART A: Open space usage:*

**1. Do you use open public space in the waterfront area?**

1. Yes
2. No

Answer: Yes

**2. Time period: When do you use these spaces the most?**

1. in the morning
2. in the afternoon
3. in the evening/during nighttime
4. other: in the morning and in the evening

Answer: 4) other: in the morning and in the evening

*PART B: Nighttime open space usage:*

**3. Frequency: How often do you visit these spaces during nighttime?**

1. very often - every day
2. often - once or twice per week
3. rarely - one or twice per month
4. almost never

Answer: 3) rarely - one or twice per month

**4. Duration: How much time do you usually spend in these places during nighttime?**

1. more than 1 hour
2. around 30 minutes
3. 10-15 minutes
4. couple of minutes

Answer: 1) more than 1 hour

**5. Activity: What type of activities do you engage in these spaces during nighttime?**

1. leisure and socialization- hanging out with friends or walking the dog
2. recreation - walking, running, cycling, exercise
3. relaxing by myself
4. just passing through
5. Other / walking the dog

Answer: 4) just passing through

**6. When spending time in open space during nighttime what is the most important spatial feature that influence the position and means of usage?**

1. urban furniture and pedestrian/bicycle paths
2. greenery and water proximity
3. Lightning
4. Other: \_\_\_\_\_

Answer: Other: river restaurants

**7. Are you satisfied with the position and overall quality of artificial lightning in these spaces?**  
(Choose grade from 1 to 5; 1-not at all, 5-very satisfied)

Answer: 3

**8. Do you feel comfortable and safe in these spaces during nighttime?**

1. Yes
2. No

Answer: No

The questionnaire No: 164

Are you conducting a survey and or interview?

1. Yes
2. No

Answer: Yes

You have been asked to complete this survey as part of scientific research "*Increasing the livability of open public space during nighttime: the importance of lightning in the waterfront areas*". The study is designed to determine the usage dynamics of the waterfront area. Your responses are entirely voluntary, and you may refuse to complete any part or all of this survey. This survey is designed to be anonymous, meaning that there should be no way to connect your responses with you. Toward that end, please do not sign your name to the survey, or include any information in your responses that makes it easy to identify you. By completing and submitting the survey, you affirm that you are at least 18 years old and that you give your consent to use your answers in this research.

*General information:*

Age:

1. 18-25;
2. 25-40;
3. 40-55;
4. 55+

Answer: 18-25

Gender

1. Female
2. Male

Answer: Female

*PART A: Open space usage:*

**1. Do you use open public space in the waterfront area?**

1. Yes
2. No

Answer: Yes

**2. Time period: When do you use these spaces the most?**

1. in the morning
2. in the afternoon
3. in the evening/during nighttime
4. other: in the morning and in the evening

Answer: 1) in the morning

*PART B: Nighttime open space usage:*

**3. Frequency: How often do you visit these spaces during nighttime?**

1. very often - every day
2. often - once or twice per week
3. rarely - one or twice per month
4. almost never

Answer: 4) almost never

**4. Duration: How much time do you usually spend in these places during nighttime?**

1. more than 1 hour
2. around 30 minutes
3. 10-15 minutes
4. couple of minutes

Answer: 2) around 30 minutes

**5. Activity: What type of activities do you engage in these spaces during nighttime?**

1. leisure and socialization- hanging out with friends or walking the dog
2. recreation - walking, running, cycling, exercise
3. relaxing by myself
4. just passing through
5. Other / walking the dog

Answer: 1) leisure and socialization- hangingt out with friends or walking the dog

**6. When spending time in open space during nighttime what is the most important spatial feature that influence the position and means of usage?**

1. urban furniture and pedestrian/bicycle paths
2. greenery and water proximity
3. Lightning
4. Other: \_\_\_\_\_

Answer: Other: monuments

**7. Are you satisfied with the position and overall quality of artificial lightning in these spaces?**  
(Choose grade from 1 to 5; 1-not at all, 5-very satisfied)

Answer: 2

**8. Do you feel comfortable and safe in these spaces during nighttime?**

1. Yes
2. No

Answer: No

The questionnaire No: 165

Are you conducting a survey and or interview?

1. Yes
2. No

Answer: Yes

You have been asked to complete this survey as part of scientific research "*Increasing the livability of open public space during nighttime: the importance of lightning in the waterfront areas*". The study is designed to determine the usage dynamics of the waterfront area. Your responses are entirely voluntary, and you may refuse to complete any part or all of this survey. This survey is designed to be anonymous, meaning that there should be no way to connect your responses with you. Toward that end, please do not sign your name to the survey, or include any information in your responses that makes it easy to identify you. By completing and submitting the survey, you affirm that you are at least 18 years old and that you give your consent to use your answers in this research.

*General information:*

Age:

1. 18-25;
2. 25-40;
3. 40-55;
4. 55+

Answer: 25-40

Gender

1. Female
2. Male

Answer: Female

*PART A: Open space usage:*

**1. Do you use open public space in the waterfront area?**

1. Yes
2. No

Answer: No

**2. Time period: When do you use these spaces the most?**

1. in the morning
2. in the afternoon
3. in the evening/during nighttime
4. other: in the morning and in the evening

Answer: 4) other: in the morning and in the evening

*PART B: Nighttime open space usage:*

**3. Frequency: How often do you visit these spaces during nighttime?**

1. very often - every day
2. often - once or twice per week
3. rarely - one or twice per month
4. almost never

Answer: 3) rarely - one or twice per month

**4. Duration: How much time do you usually spend in these places during nighttime?**

1. more than 1 hour
2. around 30 minutes
3. 10-15 minutes
4. couple of minutes

Answer: 1) more than 1 hour

**5. Activity: What type of activities do you engage in these spaces during nighttime?**

1. leisure and socialization- hanging out with friends or walking the dog
2. recreation - walking, running, cycling, exercise
3. relaxing by myself
4. just passing through
5. Other / walking the dog

Answer: 1) leisure and socialization- hangingt out with friends or walking the dog

**6. When spending time in open space during nighttime what is the most important spatial feature that influence the position and means of usage?**

1. urban furniture and pedestrian/bicycle paths
2. greenery and water proximity
3. Lightning
4. Other: \_\_\_\_\_

Answer: 1) urban furniture and pedestrian/bicycle paths

**7. Are you satisfied with the position and overall quality of artificial lightning in these spaces?**  
(Choose grade from 1 to 5; 1-not at all, 5-very satisfied)

Answer: 1

**8. Do you feel comfortable and safe in these spaces during nighttime?**

1. Yes
2. No

Answer: Yes

The questionnaire No: 166

Are you conducting a survey and or interview?

1. Yes
2. No

Answer: Yes

You have been asked to complete this survey as part of scientific research "*Increasing the livability of open public space during nighttime: the importance of lightning in the waterfront areas*". The study is designed to determine the usage dynamics of the waterfront area. Your responses are entirely voluntary, and you may refuse to complete any part or all of this survey. This survey is designed to be anonymous, meaning that there should be no way to connect your responses with you. Toward that end, please do not sign your name to the survey, or include any information in your responses that makes it easy to identify you. By completing and submitting the survey, you affirm that you are at least 18 years old and that you give your consent to use your answers in this research.

*General information:*

Age:

1. 18-25;
2. 25-40;
3. 40-55;
4. 55+

Answer: 55+

Gender

1. Female
2. Male

Answer: Male

*PART A: Open space usage:*

**1. Do you use open public space in the waterfront area?**

1. Yes
2. No

Answer: Yes

**2. Time period: When do you use these spaces the most?**

1. in the morning
2. in the afternoon
3. in the evening/during nighttime
4. other: in the morning and in the evening

Answer: 1) in the morning

*PART B: Nighttime open space usage:*

**3. Frequency: How often do you visit these spaces during nighttime?**

1. very often - every day
2. often - once or twice per week
3. rarely - one or twice per month
4. almost never

Answer: 2) often - once or twice per week

**4. Duration: How much time do you usually spend in these places during nighttime?**

1. more than 1 hour
2. around 30 minutes
3. 10-15 minutes
4. couple of minutes

Answer: 2) around 30 minutes

**5. Activity: What type of activities do you engage in these spaces during nighttime?**

1. leisure and socialization- hanging out with friends or walking the dog
2. recreation - walking, running, cycling, exercise
3. relaxing by myself
4. just passing through
5. Other / walking the dog

Answer: 1) leisure and socialization- hangingt out with friends or walking the dog

**6. When spending time in open space during nighttime what is the most important spatial feature that influence the position and means of usage?**

1. urban furniture and pedestrian/bicycle paths
2. greenery and water proximity
3. Lightning
4. Other: \_\_\_\_\_

Answer: 2) greenery and water proximity

**7. Are you satisfied with the position and overall quality of artificial lightning in these spaces?**  
(Choose grade from 1 to 5; 1-not at all, 5-very satisfied)

Answer: 1

**8. Do you feel comfortable and safe in these spaces during nighttime?**

1. Yes
2. No

Answer: No

The questionnaire No: 167

Are you conducting a survey and or interview?

1. Yes
2. No

Answer: Yes

You have been asked to complete this survey as part of scientific research "*Increasing the livability of open public space during nighttime: the importance of lightning in the waterfront areas*". The study is designed to determine the usage dynamics of the waterfront area. Your responses are entirely voluntary, and you may refuse to complete any part or all of this survey. This survey is designed to be anonymous, meaning that there should be no way to connect your responses with you. Toward that end, please do not sign your name to the survey, or include any information in your responses that makes it easy to identify you. By completing and submitting the survey, you affirm that you are at least 18 years old and that you give your consent to use your answers in this research.

*General information:*

Age:

1. 18-25;
2. 25-40;
3. 40-55;
4. 55+

Answer: 25-40

Gender

1. Female
2. Male

Answer: Male

*PART A: Open space usage:*

**1. Do you use open public space in the waterfront area?**

1. Yes
2. No

Answer: No

**2. Time period: When do you use these spaces the most?**

1. in the morning
2. in the afternoon
3. in the evening/during nighttime
4. other: in the morning and in the evening

Answer: 3) in the evening/during nighttime

*PART B: Nighttime open space usage:*

**3. Frequency: How often do you visit these spaces during nighttime?**

1. very often - every day
2. often - once or twice per week
3. rarely - one or twice per month
4. almost never

Answer: 2) often - once or twice per week

**4. Duration: How much time do you usually spend in these places during nighttime?**

1. more than 1 hour
2. around 30 minutes
3. 10-15 minutes
4. couple of minutes

Answer: 1) more than 1 hour

**5. Activity: What type of activities do you engage in these spaces during nighttime?**

1. leisure and socialization- hanging out with friends or walking the dog
2. recreation - walking, running, cycling, exercise
3. relaxing by myself
4. just passing through
5. Other / walking the dog

Answer: 2) recreation - walking, running, cycling, exercise

**6. When spending time in open space during nighttime what is the most important spatial feature that influence the position and means of usage?**

1. urban furniture and pedestrian/bicycle paths
2. greenery and water proximity
3. Lightning
4. Other: \_\_\_\_\_

Answer: 2) greenery and water proximity

**7. Are you satisfied with the position and overall quality of artificial lightning in these spaces?**  
(Choose grade from 1 to 5; 1-not at all, 5-very satisfied)

Answer: 3

**8. Do you feel comfortable and safe in these spaces during nighttime?**

1. Yes
2. No

Answer: No

The questionnaire No: 168

Are you conducting a survey and or interview?

1. Yes
2. No

Answer: Yes

You have been asked to complete this survey as part of scientific research "*Increasing the livability of open public space during nighttime: the importance of lightning in the waterfront areas*". The study is designed to determine the usage dynamics of the waterfront area. Your responses are entirely voluntary, and you may refuse to complete any part or all of this survey. This survey is designed to be anonymous, meaning that there should be no way to connect your responses with you. Toward that end, please do not sign your name to the survey, or include any information in your responses that makes it easy to identify you. By completing and submitting the survey, you affirm that you are at least 18 years old and that you give your consent to use your answers in this research.

*General information:*

Age:

1. 18-25;
2. 25-40;
3. 40-55;
4. 55+

Answer: 25-40

Gender

1. Female
2. Male

Answer: Female

*PART A: Open space usage:*

**1. Do you use open public space in the waterfront area?**

1. Yes
2. No

Answer: Yes

**2. Time period: When do you use these spaces the most?**

1. in the morning
2. in the afternoon
3. in the evening/during nighttime
4. other: in the morning and in the evening

Answer: 2) in the afternoon

*PART B: Nighttime open space usage:*

**3. Frequency: How often do you visit these spaces during nighttime?**

1. very often - every day
2. often - once or twice per week
3. rarely - one or twice per month
4. almost never

Answer: 3) rarely - one or twice per month

**4. Duration: How much time do you usually spend in these places during nighttime?**

1. more than 1 hour
2. around 30 minutes
3. 10-15 minutes
4. couple of minutes

Answer: 1) more than 1 hour

**5. Activity: What type of activities do you engage in these spaces during nighttime?**

1. leisure and socialization- hanging out with friends or walking the dog
2. recreation - walking, running, cycling, exercise
3. relaxing by myself
4. just passing through
5. Other / walking the dog

Answer: 4) just passing through

**6. When spending time in open space during nighttime what is the most important spatial feature that influence the position and means of usage?**

1. urban furniture and pedestrian/bicycle paths
2. greenery and water proximity
3. Lightning
4. Other: \_\_\_\_\_

Answer: 2) greenery and water proximity

**7. Are you satisfied with the position and overall quality of artificial lightning in these spaces?**  
(Choose grade from 1 to 5; 1-not at all, 5-very satisfied)

Answer: 5

**8. Do you feel comfortable and safe in these spaces during nighttime?**

1. Yes
2. No

Answer: Yes

The questionnaire No: 169

Are you conducting a survey and or interview?

1. Yes
2. No

Answer: Yes

You have been asked to complete this survey as part of scientific research "*Increasing the livability of open public space during nighttime: the importance of lightning in the waterfront areas*". The study is designed to determine the usage dynamics of the waterfront area. Your responses are entirely voluntary, and you may refuse to complete any part or all of this survey. This survey is designed to be anonymous, meaning that there should be no way to connect your responses with you. Toward that end, please do not sign your name to the survey, or include any information in your responses that makes it easy to identify you. By completing and submitting the survey, you affirm that you are at least 18 years old and that you give your consent to use your answers in this research.

*General information:*

Age:

1. 18-25;
2. 25-40;
3. 40-55;
4. 55+

Answer: 18-25

Gender

1. Female
2. Male

Answer: Male

*PART A: Open space usage:*

**1. Do you use open public space in the waterfront area?**

1. Yes
2. No

Answer: Yes

**2. Time period: When do you use these spaces the most?**

1. in the morning
2. in the afternoon
3. in the evening/during nighttime
4. other: in the morning and in the evening

Answer: 1) in the morning

*PART B: Nighttime open space usage:*

**3. Frequency: How often do you visit these spaces during nighttime?**

1. very often - every day
2. often - once or twice per week
3. rarely - one or twice per month
4. almost never

Answer: 3) rarely - one or twice per month

**4. Duration: How much time do you usually spend in these places during nighttime?**

1. more than 1 hour
2. around 30 minutes
3. 10-15 minutes
4. couple of minutes

Answer: 1) more than 1 hour

**5. Activity: What type of activities do you engage in these spaces during nighttime?**

1. leisure and socialization- hanging out with friends or walking the dog
2. recreation - walking, running, cycling, exercise
3. relaxing by myself
4. just passing through
5. Other / walking the dog

Answer: 1) leisure and socialization- hangingt out with friends or walking the dog

**6. When spending time in open space during nighttime what is the most important spatial feature that influence the position and means of usage?**

1. urban furniture and pedestrian/bicycle paths
2. greenery and water proximity
3. Lightning
4. Other: \_\_\_\_\_

Answer: 2) greenery and water proximity

**7. Are you satisfied with the position and overall quality of artificial lightning in these spaces?**  
(Choose grade from 1 to 5; 1-not at all, 5-very satisfied)

Answer: 1

**8. Do you feel comfortable and safe in these spaces during nighttime?**

1. Yes
2. No

Answer: No

The questionnaire No: 170

Are you conducting a survey and or interview?

1. Yes
2. No

Answer: Yes

You have been asked to complete this survey as part of scientific research "*Increasing the livability of open public space during nighttime: the importance of lightning in the waterfront areas*". The study is designed to determine the usage dynamics of the waterfront area. Your responses are entirely voluntary, and you may refuse to complete any part or all of this survey. This survey is designed to be anonymous, meaning that there should be no way to connect your responses with you. Toward that end, please do not sign your name to the survey, or include any information in your responses that makes it easy to identify you. By completing and submitting the survey, you affirm that you are at least 18 years old and that you give your consent to use your answers in this research.

*General information:*

Age:

1. 18-25;
2. 25-40;
3. 40-55;
4. 55+

Answer: 18-25

Gender

1. Female
2. Male

Answer: Female

*PART A: Open space usage:*

**1. Do you use open public space in the waterfront area?**

1. Yes
2. No

Answer: No

**2. Time period: When do you use these spaces the most?**

1. in the morning
2. in the afternoon
3. in the evening/during nighttime
4. other: in the morning and in the evening

Answer: 2) in the afternoon

The questionnaire No: 170

*PART B: Nighttime open space usage:*

**3. Frequency: How often do you visit these spaces during nighttime?**

1. very often - every day
2. often - once or twice per week
3. rarely - one or twice per month
4. almost never

Answer: 1) very often - every day

**4. Duration: How much time do you usually spend in these places during nighttime?**

1. more than 1 hour
2. around 30 minutes
3. 10-15 minutes
4. couple of minutes

Answer: 3) 10-15 minutes

**5. Activity: What type of activities do you engage in these spaces during nighttime?**

1. leisure and socialization- hanging out with friends or walking the dog
2. recreation - walking, running, cycling, exercise
3. relaxing by myself
4. just passing through
5. Other / walking the dog

Answer: 4) just passing through

**6. When spending time in open space during nighttime what is the most important spatial feature that influence the position and means of usage?**

1. urban furniture and pedestrian/bicycle paths
2. greenery and water proximity
3. Lightning
4. Other: \_\_\_\_\_

Answer: Other: monuments

**7. Are you satisfied with the position and overall quality of artificial lightning in these spaces?**  
(Choose grade from 1 to 5; 1-not at all, 5-very satisfied)

Answer: 2

**8. Do you feel comfortable and safe in these spaces during nighttime?**

1. Yes
2. No

Answer: Yes

The questionnaire No: 171

Are you conducting a survey and or interview?

1. Yes
2. No

Answer: Yes

You have been asked to complete this survey as part of scientific research "*Increasing the livability of open public space during nighttime: the importance of lightning in the waterfront areas*". The study is designed to determine the usage dynamics of the waterfront area. Your responses are entirely voluntary, and you may refuse to complete any part or all of this survey. This survey is designed to be anonymous, meaning that there should be no way to connect your responses with you. Toward that end, please do not sign your name to the survey, or include any information in your responses that makes it easy to identify you. By completing and submitting the survey, you affirm that you are at least 18 years old and that you give your consent to use your answers in this research.

*General information:*

Age:

1. 18-25;
2. 25-40;
3. 40-55;
4. 55+

Answer: 25-40

Gender

1. Female
2. Male

Answer: Female

*PART A: Open space usage:*

**1. Do you use open public space in the waterfront area?**

1. Yes
2. No

Answer: Yes

**2. Time period: When do you use these spaces the most?**

1. in the morning
2. in the afternoon
3. in the evening/during nighttime
4. other: in the morning and in the evening

Answer: 2) in the afternoon

The questionnaire No: 171

*PART B: Nighttime open space usage:*

**3. Frequency: How often do you visit these spaces during nighttime?**

1. very often - every day
2. often - once or twice per week
3. rarely - one or twice per month
4. almost never

Answer: 4) almost never

**4. Duration: How much time do you usually spend in these places during nighttime?**

1. more than 1 hour
2. around 30 minutes
3. 10-15 minutes
4. couple of minutes

Answer: 2) around 30 minutes

**5. Activity: What type of activities do you engage in these spaces during nighttime?**

1. leisure and socialization- hanging out with friends or walking the dog
2. recreation - walking, running, cycling, exercise
3. relaxing by myself
4. just passing through
5. Other / walking the dog

Answer: 1) leisure and socialization- hangingt out with friends or walking the dog

**6. When spending time in open space during nighttime what is the most important spatial feature that influence the position and means of usage?**

1. urban furniture and pedestrian/bicycle paths
2. greenery and water proximity
3. Lightning
4. Other: \_\_\_\_\_

Answer: 3) Lightning

**7. Are you satisfied with the position and overall quality of artificial lightning in these spaces?**

(Choose grade from 1 to 5; 1-not at all, 5-very satisfied)

Answer: 2

**8. Do you feel comfortable and safe in these spaces during nighttime?**

1. Yes
2. No

Answer: No

The questionnaire No: 172

Are you conducting a survey and or interview?

1. Yes
2. No

Answer: Yes

You have been asked to complete this survey as part of scientific research "*Increasing the livability of open public space during nighttime: the importance of lightning in the waterfront areas*". The study is designed to determine the usage dynamics of the waterfront area. Your responses are entirely voluntary, and you may refuse to complete any part or all of this survey. This survey is designed to be anonymous, meaning that there should be no way to connect your responses with you. Toward that end, please do not sign your name to the survey, or include any information in your responses that makes it easy to identify you. By completing and submitting the survey, you affirm that you are at least 18 years old and that you give your consent to use your answers in this research.

*General information:*

Age:

1. 18-25;
2. 25-40;
3. 40-55;
4. 55+

Answer: 25-40

Gender

1. Female
2. Male

Answer: Female

*PART A: Open space usage:*

**1. Do you use open public space in the waterfront area?**

1. Yes
2. No

Answer: Yes

**2. Time period: When do you use these spaces the most?**

1. in the morning
2. in the afternoon
3. in the evening/during nighttime
4. other: in the morning and in the evening

Answer: 2) in the afternoon

*PART B: Nighttime open space usage:*

**3. Frequency: How often do you visit these spaces during nighttime?**

1. very often - every day
2. often - once or twice per week
3. rarely - one or twice per month
4. almost never

Answer: 1) very often - every day

**4. Duration: How much time do you usually spend in these places during nighttime?**

1. more than 1 hour
2. around 30 minutes
3. 10-15 minutes
4. couple of minutes

Answer: 1) more than 1 hour

**5. Activity: What type of activities do you engage in these spaces during nighttime?**

1. leisure and socialization- hanging out with friends or walking the dog
2. recreation - walking, running, cycling, exercise
3. relaxing by myself
4. just passing through
5. Other / walking the dog

Answer: 2) recreation - walking, running, cycling, exercise

**6. When spending time in open space during nighttime what is the most important spatial feature that influence the position and means of usage?**

1. urban furniture and pedestrian/bicycle paths
2. greenery and water proximity
3. Lightning
4. Other: \_\_\_\_\_

Answer: 1) urban furniture and pedestrian/bicycle paths

**7. Are you satisfied with the position and overall quality of artificial lightning in these spaces?**  
(Choose grade from 1 to 5; 1-not at all, 5-very satisfied)

Answer: 3

**8. Do you feel comfortable and safe in these spaces during nighttime?**

1. Yes
2. No

Answer: Yes

The questionnaire No: 173

Are you conducting a survey and or interview?

1. Yes
2. No

Answer: Yes

You have been asked to complete this survey as part of scientific research "*Increasing the livability of open public space during nighttime: the importance of lightning in the waterfront areas*". The study is designed to determine the usage dynamics of the waterfront area. Your responses are entirely voluntary, and you may refuse to complete any part or all of this survey. This survey is designed to be anonymous, meaning that there should be no way to connect your responses with you. Toward that end, please do not sign your name to the survey, or include any information in your responses that makes it easy to identify you. By completing and submitting the survey, you affirm that you are at least 18 years old and that you give your consent to use your answers in this research.

*General information:*

Age:

1. 18-25;
2. 25-40;
3. 40-55;
4. 55+

Answer: 25-40

Gender

1. Female
2. Male

Answer: Female

*PART A: Open space usage:*

**1. Do you use open public space in the waterfront area?**

1. Yes
2. No

Answer: No

**2. Time period: When do you use these spaces the most?**

1. in the morning
2. in the afternoon
3. in the evening/during nighttime
4. other: in the morning and in the evening

Answer: 2) in the afternoon

The questionnaire No: 173

*PART B: Nighttime open space usage:*

**3. Frequency: How often do you visit these spaces during nighttime?**

1. very often - every day
2. often - once or twice per week
3. rarely - one or twice per month
4. almost never

Answer: 3) rarely - one or twice per month

**4. Duration: How much time do you usually spend in these places during nighttime?**

1. more than 1 hour
2. around 30 minutes
3. 10-15 minutes
4. couple of minutes

Answer: 1) more than 1 hour

**5. Activity: What type of activities do you engage in these spaces during nighttime?**

1. leisure and socialization- hanging out with friends or walking the dog
2. recreation - walking, running, cycling, exercise
3. relaxing by myself
4. just passing through
5. Other / walking the dog

Answer: 3) relaxing by myself

**6. When spending time in open space during nighttime what is the most important spatial feature that influence the position and means of usage?**

1. urban furniture and pedestrian/bicycle paths
2. greenery and water proximity
3. Lightning
4. Other: \_\_\_\_\_

Answer: 3) Lightning

**7. Are you satisfied with the position and overall quality of artificial lightning in these spaces?**  
(Choose grade from 1 to 5; 1-not at all, 5-very satisfied)

Answer: 5

**8. Do you feel comfortable and safe in these spaces during nighttime?**

1. Yes
2. No

Answer: No

The questionnaire No: 174

Are you conducting a survey and or interview?

1. Yes
2. No

Answer: Yes

You have been asked to complete this survey as part of scientific research "*Increasing the livability of open public space during nighttime: the importance of lightning in the waterfront areas*". The study is designed to determine the usage dynamics of the waterfront area. Your responses are entirely voluntary, and you may refuse to complete any part or all of this survey. This survey is designed to be anonymous, meaning that there should be no way to connect your responses with you. Toward that end, please do not sign your name to the survey, or include any information in your responses that makes it easy to identify you. By completing and submitting the survey, you affirm that you are at least 18 years old and that you give your consent to use your answers in this research.

*General information:*

Age:

1. 18-25;
2. 25-40;
3. 40-55;
4. 55+

Answer: 55+

Gender

1. Female
2. Male

Answer: Male

*PART A: Open space usage:*

**1. Do you use open public space in the waterfront area?**

1. Yes
2. No

Answer: Yes

**2. Time period: When do you use these spaces the most?**

1. in the morning
2. in the afternoon
3. in the evening/during nighttime
4. other: in the morning and in the evening

Answer: 4) other: in the morning and in the evening

The questionnaire No: 174

*PART B: Nighttime open space usage:*

**3. Frequency: How often do you visit these spaces during nighttime?**

1. very often - every day
2. often - once or twice per week
3. rarely - one or twice per month
4. almost never

Answer: 4) almost never

**4. Duration: How much time do you usually spend in these places during nighttime?**

1. more than 1 hour
2. around 30 minutes
3. 10-15 minutes
4. couple of minutes

Answer: 4) couple of minutes

**5. Activity: What type of activities do you engage in these spaces during nighttime?**

1. leisure and socialization- hanging out with friends or walking the dog
2. recreation - walking, running, cycling, exercise
3. relaxing by myself
4. just passing through
5. Other / walking the dog

Answer: 4) just passing through

**6. When spending time in open space during nighttime what is the most important spatial feature that influence the position and means of usage?**

1. urban furniture and pedestrian/bicycle paths
2. greenery and water proximity
3. Lightning
4. Other: \_\_\_\_\_

Answer: Other: river restaurants

**7. Are you satisfied with the position and overall quality of artificial lightning in these spaces?**  
(Choose grade from 1 to 5; 1-not at all, 5-very satisfied)

Answer: 3

**8. Do you feel comfortable and safe in these spaces during nighttime?**

1. Yes
2. No

Answer: Yes

The questionnaire No: 175

Are you conducting a survey and or interview?

1. Yes
2. No

Answer: Yes

You have been asked to complete this survey as part of scientific research "*Increasing the livability of open public space during nighttime: the importance of lightning in the waterfront areas*". The study is designed to determine the usage dynamics of the waterfront area. Your responses are entirely voluntary, and you may refuse to complete any part or all of this survey. This survey is designed to be anonymous, meaning that there should be no way to connect your responses with you. Toward that end, please do not sign your name to the survey, or include any information in your responses that makes it easy to identify you. By completing and submitting the survey, you affirm that you are at least 18 years old and that you give your consent to use your answers in this research.

*General information:*

Age:

1. 18-25;
2. 25-40;
3. 40-55;
4. 55+

Answer: 18-25

Gender

1. Female
2. Male

Answer: Male

*PART A: Open space usage:*

**1. Do you use open public space in the waterfront area?**

1. Yes
2. No

Answer: Yes

**2. Time period: When do you use these spaces the most?**

1. in the morning
2. in the afternoon
3. in the evening/during nighttime
4. other: in the morning and in the evening

Answer: 2) in the afternoon

*PART B: Nighttime open space usage:*

**3. Frequency: How often do you visit these spaces during nighttime?**

1. very often - every day
2. often - once or twice per week
3. rarely - one or twice per month
4. almost never

Answer: 3) rarely - one or twice per month

**4. Duration: How much time do you usually spend in these places during nighttime?**

1. more than 1 hour
2. around 30 minutes
3. 10-15 minutes
4. couple of minutes

Answer: 1) more than 1 hour

**5. Activity: What type of activities do you engage in these spaces during nighttime?**

1. leisure and socialization- hanging out with friends or walking the dog
2. recreation - walking, running, cycling, exercise
3. relaxing by myself
4. just passing through
5. Other / walking the dog

Answer: 1) leisure and socialization- hangingt out with friends or walking the dog

**6. When spending time in open space during nighttime what is the most important spatial feature that influence the position and means of usage?**

1. urban furniture and pedestrian/bicycle paths
2. greenery and water proximity
3. Lightning
4. Other: \_\_\_\_\_

Answer: Other: river restaurants

**7. Are you satisfied with the position and overall quality of artificial lightning in these spaces?**  
(Choose grade from 1 to 5; 1-not at all, 5-very satisfied)

Answer: 3

**8. Do you feel comfortable and safe in these spaces during nighttime?**

1. Yes
2. No

Answer: Yes

The questionnaire No: 176

Are you conducting a survey and or interview?

1. Yes
2. No

Answer: Yes

You have been asked to complete this survey as part of scientific research "*Increasing the livability of open public space during nighttime: the importance of lightning in the waterfront areas*". The study is designed to determine the usage dynamics of the waterfront area. Your responses are entirely voluntary, and you may refuse to complete any part or all of this survey. This survey is designed to be anonymous, meaning that there should be no way to connect your responses with you. Toward that end, please do not sign your name to the survey, or include any information in your responses that makes it easy to identify you. By completing and submitting the survey, you affirm that you are at least 18 years old and that you give your consent to use your answers in this research.

*General information:*

Age:

1. 18-25;
2. 25-40;
3. 40-55;
4. 55+

Answer: 25-40

Gender

1. Female
2. Male

Answer: Male

*PART A: Open space usage:*

**1. Do you use open public space in the waterfront area?**

1. Yes
2. No

Answer: Yes

**2. Time period: When do you use these spaces the most?**

1. in the morning
2. in the afternoon
3. in the evening/during nighttime
4. other: in the morning and in the evening

Answer: 1) in the morning

*PART B: Nighttime open space usage:*

**3. Frequency: How often do you visit these spaces during nighttime?**

1. very often - every day
2. often - once or twice per week
3. rarely - one or twice per month
4. almost never

Answer: 2) often - once or twice per week

**4. Duration: How much time do you usually spend in these places during nighttime?**

1. more than 1 hour
2. around 30 minutes
3. 10-15 minutes
4. couple of minutes

Answer: 1) more than 1 hour

**5. Activity: What type of activities do you engage in these spaces during nighttime?**

1. leisure and socialization- hanging out with friends or walking the dog
2. recreation - walking, running, cycling, exercise
3. relaxing by myself
4. just passing through
5. Other / walking the dog

Answer: 2) recreation - walking, running, cycling, exercise

**6. When spending time in open space during nighttime what is the most important spatial feature that influence the position and means of usage?**

1. urban furniture and pedestrian/bicycle paths
2. greenery and water proximity
3. Lightning
4. Other: \_\_\_\_\_

Answer: 2) greenery and water proximity

**7. Are you satisfied with the position and overall quality of artificial lightning in these spaces?**  
(Choose grade from 1 to 5; 1-not at all, 5-very satisfied)

Answer: 1

**8. Do you feel comfortable and safe in these spaces during nighttime?**

1. Yes
2. No

Answer: No

The questionnaire No: 177

Are you conducting a survey and or interview?

1. Yes
2. No

Answer: Yes

You have been asked to complete this survey as part of scientific research "*Increasing the livability of open public space during nighttime: the importance of lightning in the waterfront areas*". The study is designed to determine the usage dynamics of the waterfront area. Your responses are entirely voluntary, and you may refuse to complete any part or all of this survey. This survey is designed to be anonymous, meaning that there should be no way to connect your responses with you. Toward that end, please do not sign your name to the survey, or include any information in your responses that makes it easy to identify you. By completing and submitting the survey, you affirm that you are at least 18 years old and that you give your consent to use your answers in this research.

*General information:*

Age:

1. 18-25;
2. 25-40;
3. 40-55;
4. 55+

Answer: 40-55

Gender

1. Female
2. Male

Answer: Female

*PART A: Open space usage:*

**1. Do you use open public space in the waterfront area?**

1. Yes
2. No

Answer: Yes

**2. Time period: When do you use these spaces the most?**

1. in the morning
2. in the afternoon
3. in the evening/during nighttime
4. other: in the morning and in the evening

Answer: 2) in the afternoon

*PART B: Nighttime open space usage:*

**3. Frequency: How often do you visit these spaces during nighttime?**

1. very often - every day
2. often - once or twice per week
3. rarely - one or twice per month
4. almost never

Answer: 4) almost never

**4. Duration: How much time do you usually spend in these places during nighttime?**

1. more than 1 hour
2. around 30 minutes
3. 10-15 minutes
4. couple of minutes

Answer: 2) around 30 minutes

**5. Activity: What type of activities do you engage in these spaces during nighttime?**

1. leisure and socialization- hanging out with friends or walking the dog
2. recreation - walking, running, cycling, exercise
3. relaxing by myself
4. just passing through
5. Other / walking the dog

Answer: 4) just passing through

**6. When spending time in open space during nighttime what is the most important spatial feature that influence the position and means of usage?**

1. urban furniture and pedestrian/bicycle paths
2. greenery and water proximity
3. Lightning
4. Other: \_\_\_\_\_

Answer: 3) Lightning

**7. Are you satisfied with the position and overall quality of artificial lightning in these spaces?**  
(Choose grade from 1 to 5; 1-not at all, 5-very satisfied)

Answer: 2

**8. Do you feel comfortable and safe in these spaces during nighttime?**

1. Yes
2. No

Answer: Yes

The questionnaire No: 178

Are you conducting a survey and or interview?

1. Yes
2. No

Answer: Yes

You have been asked to complete this survey as part of scientific research "*Increasing the livability of open public space during nighttime: the importance of lightning in the waterfront areas*". The study is designed to determine the usage dynamics of the waterfront area. Your responses are entirely voluntary, and you may refuse to complete any part or all of this survey. This survey is designed to be anonymous, meaning that there should be no way to connect your responses with you. Toward that end, please do not sign your name to the survey, or include any information in your responses that makes it easy to identify you. By completing and submitting the survey, you affirm that you are at least 18 years old and that you give your consent to use your answers in this research.

*General information:*

Age:

1. 18-25;
2. 25-40;
3. 40-55;
4. 55+

Answer: 18-25

Gender

1. Female
2. Male

Answer: Male

*PART A: Open space usage:*

**1. Do you use open public space in the waterfront area?**

1. Yes
2. No

Answer: Yes

**2. Time period: When do you use these spaces the most?**

1. in the morning
2. in the afternoon
3. in the evening/during nighttime
4. other: in the morning and in the evening

Answer: 3) in the evening/during nighttime

The questionnaire No: 178

*PART B: Nighttime open space usage:*

**3. Frequency: How often do you visit these spaces during nighttime?**

1. very often - every day
2. often - once or twice per week
3. rarely - one or twice per month
4. almost never

Answer: 4) almost never

**4. Duration: How much time do you usually spend in these places during nighttime?**

1. more than 1 hour
2. around 30 minutes
3. 10-15 minutes
4. couple of minutes

Answer: 3) 10-15 minutes

**5. Activity: What type of activities do you engage in these spaces during nighttime?**

1. leisure and socialization- hanging out with friends or walking the dog
2. recreation - walking, running, cycling, exercise
3. relaxing by myself
4. just passing through
5. Other / walking the dog

Answer: 1) leisure and socialization- hangingt out with friends or walking the dog

**6. When spending time in open space during nighttime what is the most important spatial feature that influence the position and means of usage?**

1. urban furniture and pedestrian/bicycle paths
2. greenery and water proximity
3. Lightning
4. Other: \_\_\_\_\_

Answer: 1) urban furniture and pedestrian/bicycle paths

**7. Are you satisfied with the position and overall quality of artificial lightning in these spaces?**  
(Choose grade from 1 to 5; 1-not at all, 5-very satisfied)

Answer: 3

**8. Do you feel comfortable and safe in these spaces during nighttime?**

1. Yes
2. No

Answer: No

The questionnaire No: 179

Are you conducting a survey and or interview?

1. Yes
2. No

Answer: Yes

You have been asked to complete this survey as part of scientific research "*Increasing the livability of open public space during nighttime: the importance of lightning in the waterfront areas*". The study is designed to determine the usage dynamics of the waterfront area. Your responses are entirely voluntary, and you may refuse to complete any part or all of this survey. This survey is designed to be anonymous, meaning that there should be no way to connect your responses with you. Toward that end, please do not sign your name to the survey, or include any information in your responses that makes it easy to identify you. By completing and submitting the survey, you affirm that you are at least 18 years old and that you give your consent to use your answers in this research.

*General information:*

Age:

1. 18-25;
2. 25-40;
3. 40-55;
4. 55+

Answer: 40-55

Gender

1. Female
2. Male

Answer: Male

*PART A: Open space usage:*

**1. Do you use open public space in the waterfront area?**

1. Yes
2. No

Answer: No

**2. Time period: When do you use these spaces the most?**

1. in the morning
2. in the afternoon
3. in the evening/during nighttime
4. other: in the morning and in the evening

Answer: 2) in the afternoon

*PART B: Nighttime open space usage:*

**3. Frequency: How often do you visit these spaces during nighttime?**

1. very often - every day
2. often - once or twice per week
3. rarely - one or twice per month
4. almost never

Answer: 1) very often - every day

**4. Duration: How much time do you usually spend in these places during nighttime?**

1. more than 1 hour
2. around 30 minutes
3. 10-15 minutes
4. couple of minutes

Answer: 3) 10-15 minutes

**5. Activity: What type of activities do you engage in these spaces during nighttime?**

1. leisure and socialization- hanging out with friends or walking the dog
2. recreation - walking, running, cycling, exercise
3. relaxing by myself
4. just passing through
5. Other / walking the dog

Answer: 4) just passing through

**6. When spending time in open space during nighttime what is the most important spatial feature that influence the position and means of usage?**

1. urban furniture and pedestrian/bicycle paths
2. greenery and water proximity
3. Lightning
4. Other: \_\_\_\_\_

Answer: 3) Lightning

**7. Are you satisfied with the position and overall quality of artificial lightning in these spaces?**  
(Choose grade from 1 to 5; 1-not at all, 5-very satisfied)

Answer: 2

**8. Do you feel comfortable and safe in these spaces during nighttime?**

1. Yes
2. No

Answer: No

The questionnaire No: 180

Are you conducting a survey and or interview?

1. Yes
2. No

Answer: Yes

You have been asked to complete this survey as part of scientific research "*Increasing the livability of open public space during nighttime: the importance of lightning in the waterfront areas*". The study is designed to determine the usage dynamics of the waterfront area. Your responses are entirely voluntary, and you may refuse to complete any part or all of this survey. This survey is designed to be anonymous, meaning that there should be no way to connect your responses with you. Toward that end, please do not sign your name to the survey, or include any information in your responses that makes it easy to identify you. By completing and submitting the survey, you affirm that you are at least 18 years old and that you give your consent to use your answers in this research.

*General information:*

Age:

1. 18-25;
2. 25-40;
3. 40-55;
4. 55+

Answer: 25-40

Gender

1. Female
2. Male

Answer: Female

*PART A: Open space usage:*

**1. Do you use open public space in the waterfront area?**

1. Yes
2. No

Answer: Yes

**2. Time period: When do you use these spaces the most?**

1. in the morning
2. in the afternoon
3. in the evening/during nighttime
4. other: in the morning and in the evening

Answer: 3) in the evening/during nighttime

The questionnaire No: 180

*PART B: Nighttime open space usage:*

**3. Frequency: How often do you visit these spaces during nighttime?**

1. very often - every day
2. often - once or twice per week
3. rarely - one or twice per month
4. almost never

Answer: 1) very often - every day

**4. Duration: How much time do you usually spend in these places during nighttime?**

1. more than 1 hour
2. around 30 minutes
3. 10-15 minutes
4. couple of minutes

Answer: 2) around 30 minutes

**5. Activity: What type of activities do you engage in these spaces during nighttime?**

1. leisure and socialization- hanging out with friends or walking the dog
2. recreation - walking, running, cycling, exercise
3. relaxing by myself
4. just passing through
5. Other / walking the dog

Answer: 1) leisure and socialization- hangingt out with friends or walking the dog

**6. When spending time in open space during nighttime what is the most important spatial feature that influence the position and means of usage?**

1. urban furniture and pedestrian/bicycle paths
2. greenery and water proximity
3. Lightning
4. Other: \_\_\_\_\_

Answer: 3) Lightning

**7. Are you satisfied with the position and overall quality of artificial lightning in these spaces?**  
(Choose grade from 1 to 5; 1-not at all, 5-very satisfied)

Answer: 2

**8. Do you feel comfortable and safe in these spaces during nighttime?**

1. Yes
2. No

Answer: No

The questionnaire No: 181

Are you conducting a survey and or interview?

1. Yes
2. No

Answer: Yes

You have been asked to complete this survey as part of scientific research "*Increasing the livability of open public space during nighttime: the importance of lightning in the waterfront areas*". The study is designed to determine the usage dynamics of the waterfront area. Your responses are entirely voluntary, and you may refuse to complete any part or all of this survey. This survey is designed to be anonymous, meaning that there should be no way to connect your responses with you. Toward that end, please do not sign your name to the survey, or include any information in your responses that makes it easy to identify you. By completing and submitting the survey, you affirm that you are at least 18 years old and that you give your consent to use your answers in this research.

*General information:*

Age:

1. 18-25;
2. 25-40;
3. 40-55;
4. 55+

Answer: 55+

Gender

1. Female
2. Male

Answer: Female

*PART A: Open space usage:*

**1. Do you use open public space in the waterfront area?**

1. Yes
2. No

Answer: Yes

**2. Time period: When do you use these spaces the most?**

1. in the morning
2. in the afternoon
3. in the evening/during nighttime
4. other: in the morning and in the evening

Answer: 1) in the morning

*PART B: Nighttime open space usage:*

**3. Frequency: How often do you visit these spaces during nighttime?**

1. very often - every day
2. often - once or twice per week
3. rarely - one or twice per month
4. almost never

Answer: 4) almost never

**4. Duration: How much time do you usually spend in these places during nighttime?**

1. more than 1 hour
2. around 30 minutes
3. 10-15 minutes
4. couple of minutes

Answer: 1) more than 1 hour

**5. Activity: What type of activities do you engage in these spaces during nighttime?**

1. leisure and socialization- hanging out with friends or walking the dog
2. recreation - walking, running, cycling, exercise
3. relaxing by myself
4. just passing through
5. Other / walking the dog

Answer: 1) leisure and socialization- hangingt out with friends or walking the dog

**6. When spending time in open space during nighttime what is the most important spatial feature that influence the position and means of usage?**

1. urban furniture and pedestrian/bicycle paths
2. greenery and water proximity
3. Lightning
4. Other: \_\_\_\_\_

Answer: Other: monuments

**7. Are you satisfied with the position and overall quality of artificial lightning in these spaces?**  
(Choose grade from 1 to 5; 1-not at all, 5-very satisfied)

Answer: 5

**8. Do you feel comfortable and safe in these spaces during nighttime?**

1. Yes
2. No

Answer: No

The questionnaire No: 182

Are you conducting a survey and or interview?

1. Yes
2. No

Answer: Yes

You have been asked to complete this survey as part of scientific research "*Increasing the livability of open public space during nighttime: the importance of lightning in the waterfront areas*". The study is designed to determine the usage dynamics of the waterfront area. Your responses are entirely voluntary, and you may refuse to complete any part or all of this survey. This survey is designed to be anonymous, meaning that there should be no way to connect your responses with you. Toward that end, please do not sign your name to the survey, or include any information in your responses that makes it easy to identify you. By completing and submitting the survey, you affirm that you are at least 18 years old and that you give your consent to use your answers in this research.

*General information:*

Age:

1. 18-25;
2. 25-40;
3. 40-55;
4. 55+

Answer: 40-55

Gender

1. Female
2. Male

Answer: Female

*PART A: Open space usage:*

**1. Do you use open public space in the waterfront area?**

1. Yes
2. No

Answer: No

**2. Time period: When do you use these spaces the most?**

1. in the morning
2. in the afternoon
3. in the evening/during nighttime
4. other: in the morning and in the evening

Answer: 4) other: in the morning and in the evening

*PART B: Nighttime open space usage:*

**3. Frequency: How often do you visit these spaces during nighttime?**

1. very often - every day
2. often - once or twice per week
3. rarely - one or twice per month
4. almost never

Answer: 3) rarely - one or twice per month

**4. Duration: How much time do you usually spend in these places during nighttime?**

1. more than 1 hour
2. around 30 minutes
3. 10-15 minutes
4. couple of minutes

Answer: 4) couple of minutes

**5. Activity: What type of activities do you engage in these spaces during nighttime?**

1. leisure and socialization- hanging out with friends or walking the dog
2. recreation - walking, running, cycling, exercise
3. relaxing by myself
4. just passing through
5. Other / walking the dog

Answer: 2) recreation - walking, running, cycling, exercise

**6. When spending time in open space during nighttime what is the most important spatial feature that influence the position and means of usage?**

1. urban furniture and pedestrian/bicycle paths
2. greenery and water proximity
3. Lightning
4. Other: \_\_\_\_\_

Answer: 3) Lightning

**7. Are you satisfied with the position and overall quality of artificial lightning in these spaces?**  
(Choose grade from 1 to 5; 1-not at all, 5-very satisfied)

Answer: 2

**8. Do you feel comfortable and safe in these spaces during nighttime?**

1. Yes
2. No

Answer: No

The questionnaire No: 183

Are you conducting a survey and or interview?

1. Yes
2. No

Answer: Yes

You have been asked to complete this survey as part of scientific research "*Increasing the livability of open public space during nighttime: the importance of lightning in the waterfront areas*". The study is designed to determine the usage dynamics of the waterfront area. Your responses are entirely voluntary, and you may refuse to complete any part or all of this survey. This survey is designed to be anonymous, meaning that there should be no way to connect your responses with you. Toward that end, please do not sign your name to the survey, or include any information in your responses that makes it easy to identify you. By completing and submitting the survey, you affirm that you are at least 18 years old and that you give your consent to use your answers in this research.

*General information:*

Age:

1. 18-25;
2. 25-40;
3. 40-55;
4. 55+

Answer: 25-40

Gender

1. Female
2. Male

Answer: Female

*PART A: Open space usage:*

**1. Do you use open public space in the waterfront area?**

1. Yes
2. No

Answer: Yes

**2. Time period: When do you use these spaces the most?**

1. in the morning
2. in the afternoon
3. in the evening/during nighttime
4. other: in the morning and in the evening

Answer: 3) in the evening/during nighttime

*PART B: Nighttime open space usage:*

**3. Frequency: How often do you visit these spaces during nighttime?**

1. very often - every day
2. often - once or twice per week
3. rarely - one or twice per month
4. almost never

Answer: 2) often - once or twice per week

**4. Duration: How much time do you usually spend in these places during nighttime?**

1. more than 1 hour
2. around 30 minutes
3. 10-15 minutes
4. couple of minutes

Answer: 1) more than 1 hour

**5. Activity: What type of activities do you engage in these spaces during nighttime?**

1. leisure and socialization- hanging out with friends or walking the dog
2. recreation - walking, running, cycling, exercise
3. relaxing by myself
4. just passing through
5. Other / walking the dog

Answer: 2) recreation - walking, running, cycling, exercise

**6. When spending time in open space during nighttime what is the most important spatial feature that influence the position and means of usage?**

1. urban furniture and pedestrian/bicycle paths
2. greenery and water proximity
3. Lightning
4. Other: \_\_\_\_\_

Answer: 3) Lightning

**7. Are you satisfied with the position and overall quality of artificial lightning in these spaces?**  
(Choose grade from 1 to 5; 1-not at all, 5-very satisfied)

Answer: 2

**8. Do you feel comfortable and safe in these spaces during nighttime?**

1. Yes
2. No

Answer: No

The questionnaire No: 184

Are you conducting a survey and or interview?

1. Yes
2. No

Answer: Yes

You have been asked to complete this survey as part of scientific research "*Increasing the livability of open public space during nighttime: the importance of lightning in the waterfront areas*". The study is designed to determine the usage dynamics of the waterfront area. Your responses are entirely voluntary, and you may refuse to complete any part or all of this survey. This survey is designed to be anonymous, meaning that there should be no way to connect your responses with you. Toward that end, please do not sign your name to the survey, or include any information in your responses that makes it easy to identify you. By completing and submitting the survey, you affirm that you are at least 18 years old and that you give your consent to use your answers in this research.

*General information:*

Age:

1. 18-25;
2. 25-40;
3. 40-55;
4. 55+

Answer: 40-55

Gender

1. Female
2. Male

Answer: Female

*PART A: Open space usage:*

**1. Do you use open public space in the waterfront area?**

1. Yes
2. No

Answer: No

**2. Time period: When do you use these spaces the most?**

1. in the morning
2. in the afternoon
3. in the evening/during nighttime
4. other: in the morning and in the evening

Answer: 2) in the afternoon

*PART B: Nighttime open space usage:*

**3. Frequency: How often do you visit these spaces during nighttime?**

1. very often - every day
2. often - once or twice per week
3. rarely - one or twice per month
4. almost never

Answer: 1) very often - every day

**4. Duration: How much time do you usually spend in these places during nighttime?**

1. more than 1 hour
2. around 30 minutes
3. 10-15 minutes
4. couple of minutes

Answer: 2) around 30 minutes

**5. Activity: What type of activities do you engage in these spaces during nighttime?**

1. leisure and socialization- hanging out with friends or walking the dog
2. recreation - walking, running, cycling, exercise
3. relaxing by myself
4. just passing through
5. Other / walking the dog

Answer: Other: walking the dog

**6. When spending time in open space during nighttime what is the most important spatial feature that influence the position and means of usage?**

1. urban furniture and pedestrian/bicycle paths
2. greenery and water proximity
3. Lightning
4. Other: \_\_\_\_\_

Answer: 3) Lightning

**7. Are you satisfied with the position and overall quality of artificial lightning in these spaces?**  
(Choose grade from 1 to 5; 1-not at all, 5-very satisfied)

Answer: 2

**8. Do you feel comfortable and safe in these spaces during nighttime?**

1. Yes
2. No

Answer: No

The questionnaire No: 185

Are you conducting a survey and or interview?

1. Yes
2. No

Answer: Yes

You have been asked to complete this survey as part of scientific research "*Increasing the livability of open public space during nighttime: the importance of lightning in the waterfront areas*". The study is designed to determine the usage dynamics of the waterfront area. Your responses are entirely voluntary, and you may refuse to complete any part or all of this survey. This survey is designed to be anonymous, meaning that there should be no way to connect your responses with you. Toward that end, please do not sign your name to the survey, or include any information in your responses that makes it easy to identify you. By completing and submitting the survey, you affirm that you are at least 18 years old and that you give your consent to use your answers in this research.

*General information:*

Age:

1. 18-25;
2. 25-40;
3. 40-55;
4. 55+

Answer: 40-55

Gender

1. Female
2. Male

Answer: Male

*PART A: Open space usage:*

**1. Do you use open public space in the waterfront area?**

1. Yes
2. No

Answer: Yes

**2. Time period: When do you use these spaces the most?**

1. in the morning
2. in the afternoon
3. in the evening/during nighttime
4. other: in the morning and in the evening

Answer: 3) in the evening/during nighttime

*PART B: Nighttime open space usage:*

**3. Frequency: How often do you visit these spaces during nighttime?**

1. very often - every day
2. often - once or twice per week
3. rarely - one or twice per month
4. almost never

Answer: 3) rarely - one or twice per month

**4. Duration: How much time do you usually spend in these places during nighttime?**

1. more than 1 hour
2. around 30 minutes
3. 10-15 minutes
4. couple of minutes

Answer: 4) couple of minutes

**5. Activity: What type of activities do you engage in these spaces during nighttime?**

1. leisure and socialization- hanging out with friends or walking the dog
2. recreation - walking, running, cycling, exercise
3. relaxing by myself
4. just passing through
5. Other / walking the dog

Answer: 1) leisure and socialization- hangingt out with friends or walking the dog

**6. When spending time in open space during nighttime what is the most important spatial feature that influence the position and means of usage?**

1. urban furniture and pedestrian/bicycle paths
2. greenery and water proximity
3. Lightning
4. Other: \_\_\_\_\_

Answer: 3) Lightning

**7. Are you satisfied with the position and overall quality of artificial lightning in these spaces?**  
(Choose grade from 1 to 5; 1-not at all, 5-very satisfied)

Answer: 2

**8. Do you feel comfortable and safe in these spaces during nighttime?**

1. Yes
2. No

Answer: No

The questionnaire No: 186

Are you conducting a survey and or interview?

1. Yes
2. No

Answer: Yes

You have been asked to complete this survey as part of scientific research "*Increasing the livability of open public space during nighttime: the importance of lightning in the waterfront areas*". The study is designed to determine the usage dynamics of the waterfront area. Your responses are entirely voluntary, and you may refuse to complete any part or all of this survey. This survey is designed to be anonymous, meaning that there should be no way to connect your responses with you. Toward that end, please do not sign your name to the survey, or include any information in your responses that makes it easy to identify you. By completing and submitting the survey, you affirm that you are at least 18 years old and that you give your consent to use your answers in this research.

*General information:*

Age:

1. 18-25;
2. 25-40;
3. 40-55;
4. 55+

Answer: 18-25

Gender

1. Female
2. Male

Answer: Female

*PART A: Open space usage:*

**1. Do you use open public space in the waterfront area?**

1. Yes
2. No

Answer: No

**2. Time period: When do you use these spaces the most?**

1. in the morning
2. in the afternoon
3. in the evening/during nighttime
4. other: in the morning and in the evening

Answer: 4) other: in the morning and in the evening

*PART B: Nighttime open space usage:*

**3. Frequency: How often do you visit these spaces during nighttime?**

1. very often - every day
2. often - once or twice per week
3. rarely - one or twice per month
4. almost never

Answer: 3) rarely - one or twice per month

**4. Duration: How much time do you usually spend in these places during nighttime?**

1. more than 1 hour
2. around 30 minutes
3. 10-15 minutes
4. couple of minutes

Answer: 2) around 30 minutes

**5. Activity: What type of activities do you engage in these spaces during nighttime?**

1. leisure and socialization- hanging out with friends or walking the dog
2. recreation - walking, running, cycling, exercise
3. relaxing by myself
4. just passing through
5. Other / walking the dog

Answer: 2) recreation - walking, running, cycling, exercise

**6. When spending time in open space during nighttime what is the most important spatial feature that influence the position and means of usage?**

1. urban furniture and pedestrian/bicycle paths
2. greenery and water proximity
3. Lightning
4. Other: \_\_\_\_\_

Answer: 3) Lightning

**7. Are you satisfied with the position and overall quality of artificial lightning in these spaces?**  
(Choose grade from 1 to 5; 1-not at all, 5-very satisfied)

Answer: 2

**8. Do you feel comfortable and safe in these spaces during nighttime?**

1. Yes
2. No

Answer: No

The questionnaire No: 187

Are you conducting a survey and or interview?

1. Yes
2. No

Answer: Yes

You have been asked to complete this survey as part of scientific research "*Increasing the livability of open public space during nighttime: the importance of lightning in the waterfront areas*". The study is designed to determine the usage dynamics of the waterfront area. Your responses are entirely voluntary, and you may refuse to complete any part or all of this survey. This survey is designed to be anonymous, meaning that there should be no way to connect your responses with you. Toward that end, please do not sign your name to the survey, or include any information in your responses that makes it easy to identify you. By completing and submitting the survey, you affirm that you are at least 18 years old and that you give your consent to use your answers in this research.

*General information:*

Age:

1. 18-25;
2. 25-40;
3. 40-55;
4. 55+

Answer: 40-55

Gender

1. Female
2. Male

Answer: Female

*PART A: Open space usage:*

**1. Do you use open public space in the waterfront area?**

1. Yes
2. No

Answer: Yes

**2. Time period: When do you use these spaces the most?**

1. in the morning
2. in the afternoon
3. in the evening/during nighttime
4. other: in the morning and in the evening

Answer: 1) in the morning

*PART B: Nighttime open space usage:*

**3. Frequency: How often do you visit these spaces during nighttime?**

1. very often - every day
2. often - once or twice per week
3. rarely - one or twice per month
4. almost never

Answer: 4) almost never

**4. Duration: How much time do you usually spend in these places during nighttime?**

1. more than 1 hour
2. around 30 minutes
3. 10-15 minutes
4. couple of minutes

Answer: 4) couple of minutes

**5. Activity: What type of activities do you engage in these spaces during nighttime?**

1. leisure and socialization- hanging out with friends or walking the dog
2. recreation - walking, running, cycling, exercise
3. relaxing by myself
4. just passing through
5. Other / walking the dog

Answer: 1) leisure and socialization- hangingt out with friends or walking the dog

**6. When spending time in open space during nighttime what is the most important spatial feature that influence the position and means of usage?**

1. urban furniture and pedestrian/bicycle paths
2. greenery and water proximity
3. Lightning
4. Other: \_\_\_\_\_

Answer: 2) greenery and water proximity

**7. Are you satisfied with the position and overall quality of artificial lightning in these spaces?**  
(Choose grade from 1 to 5; 1-not at all, 5-very satisfied)

Answer: 3

**8. Do you feel comfortable and safe in these spaces during nighttime?**

1. Yes
2. No

Answer: No

The questionnaire No: 188

Are you conducting a survey and or interview?

1. Yes
2. No

Answer: Yes

You have been asked to complete this survey as part of scientific research "*Increasing the livability of open public space during nighttime: the importance of lightning in the waterfront areas*". The study is designed to determine the usage dynamics of the waterfront area. Your responses are entirely voluntary, and you may refuse to complete any part or all of this survey. This survey is designed to be anonymous, meaning that there should be no way to connect your responses with you. Toward that end, please do not sign your name to the survey, or include any information in your responses that makes it easy to identify you. By completing and submitting the survey, you affirm that you are at least 18 years old and that you give your consent to use your answers in this research.

*General information:*

Age:

1. 18-25;
2. 25-40;
3. 40-55;
4. 55+

Answer: 25-40

Gender

1. Female
2. Male

Answer: Female

*PART A: Open space usage:*

**1. Do you use open public space in the waterfront area?**

1. Yes
2. No

Answer: Yes

**2. Time period: When do you use these spaces the most?**

1. in the morning
2. in the afternoon
3. in the evening/during nighttime
4. other: in the morning and in the evening

Answer: 1) in the morning

*PART B: Nighttime open space usage:*

**3. Frequency: How often do you visit these spaces during nighttime?**

1. very often - every day
2. often - once or twice per week
3. rarely - one or twice per month
4. almost never

Answer: 2) often - once or twice per week

**4. Duration: How much time do you usually spend in these places during nighttime?**

1. more than 1 hour
2. around 30 minutes
3. 10-15 minutes
4. couple of minutes

Answer: 1) more than 1 hour

**5. Activity: What type of activities do you engage in these spaces during nighttime?**

1. leisure and socialization- hanging out with friends or walking the dog
2. recreation - walking, running, cycling, exercise
3. relaxing by myself
4. just passing through
5. Other / walking the dog

Answer: 4) just passing through

**6. When spending time in open space during nighttime what is the most important spatial feature that influence the position and means of usage?**

1. urban furniture and pedestrian/bicycle paths
2. greenery and water proximity
3. Lightning
4. Other: \_\_\_\_\_

Answer: 3) Lightning

**7. Are you satisfied with the position and overall quality of artificial lightning in these spaces?**  
(Choose grade from 1 to 5; 1-not at all, 5-very satisfied)

Answer: 2

**8. Do you feel comfortable and safe in these spaces during nighttime?**

1. Yes
2. No

Answer: Yes

The questionnaire No: 189

Are you conducting a survey and or interview?

1. Yes
2. No

Answer: Yes

You have been asked to complete this survey as part of scientific research "*Increasing the livability of open public space during nighttime: the importance of lightning in the waterfront areas*". The study is designed to determine the usage dynamics of the waterfront area. Your responses are entirely voluntary, and you may refuse to complete any part or all of this survey. This survey is designed to be anonymous, meaning that there should be no way to connect your responses with you. Toward that end, please do not sign your name to the survey, or include any information in your responses that makes it easy to identify you. By completing and submitting the survey, you affirm that you are at least 18 years old and that you give your consent to use your answers in this research.

*General information:*

Age:

1. 18-25;
2. 25-40;
3. 40-55;
4. 55+

Answer: 40-55

Gender

1. Female
2. Male

Answer: Male

*PART A: Open space usage:*

**1. Do you use open public space in the waterfront area?**

1. Yes
2. No

Answer: No

**2. Time period: When do you use these spaces the most?**

1. in the morning
2. in the afternoon
3. in the evening/during nighttime
4. other: in the morning and in the evening

Answer: 4) other: in the morning and in the evening

*PART B: Nighttime open space usage:*

**3. Frequency: How often do you visit these spaces during nighttime?**

1. very often - every day
2. often - once or twice per week
3. rarely - one or twice per month
4. almost never

Answer: 3) rarely - one or twice per month

**4. Duration: How much time do you usually spend in these places during nighttime?**

1. more than 1 hour
2. around 30 minutes
3. 10-15 minutes
4. couple of minutes

Answer: 1) more than 1 hour

**5. Activity: What type of activities do you engage in these spaces during nighttime?**

1. leisure and socialization- hanging out with friends or walking the dog
2. recreation - walking, running, cycling, exercise
3. relaxing by myself
4. just passing through
5. Other / walking the dog

Answer: 1) leisure and socialization- hangingt out with friends or walking the dog

**6. When spending time in open space during nighttime what is the most important spatial feature that influence the position and means of usage?**

1. urban furniture and pedestrian/bicycle paths
2. greenery and water proximity
3. Lightning
4. Other: \_\_\_\_\_

Answer: 3) Lightning

**7. Are you satisfied with the position and overall quality of artificial lightning in these spaces?**  
(Choose grade from 1 to 5; 1-not at all, 5-very satisfied)

Answer: 2

**8. Do you feel comfortable and safe in these spaces during nighttime?**

1. Yes
2. No

Answer: No

The questionnaire No: 190

Are you conducting a survey and or interview?

1. Yes
2. No

Answer: Yes

You have been asked to complete this survey as part of scientific research "*Increasing the livability of open public space during nighttime: the importance of lightning in the waterfront areas*". The study is designed to determine the usage dynamics of the waterfront area. Your responses are entirely voluntary, and you may refuse to complete any part or all of this survey. This survey is designed to be anonymous, meaning that there should be no way to connect your responses with you. Toward that end, please do not sign your name to the survey, or include any information in your responses that makes it easy to identify you. By completing and submitting the survey, you affirm that you are at least 18 years old and that you give your consent to use your answers in this research.

*General information:*

Age:

1. 18-25;
2. 25-40;
3. 40-55;
4. 55+

Answer: 40-55

Gender

1. Female
2. Male

Answer: Female

*PART A: Open space usage:*

**1. Do you use open public space in the waterfront area?**

1. Yes
2. No

Answer: No

**2. Time period: When do you use these spaces the most?**

1. in the morning
2. in the afternoon
3. in the evening/during nighttime
4. other: in the morning and in the evening

Answer: 4) other: in the morning and in the evening

*PART B: Nighttime open space usage:*

**3. Frequency: How often do you visit these spaces during nighttime?**

1. very often - every day
2. often - once or twice per week
3. rarely - one or twice per month
4. almost never

Answer: 3) rarely - one or twice per month

**4. Duration: How much time do you usually spend in these places during nighttime?**

1. more than 1 hour
2. around 30 minutes
3. 10-15 minutes
4. couple of minutes

Answer: 4) couple of minutes

**5. Activity: What type of activities do you engage in these spaces during nighttime?**

1. leisure and socialization- hanging out with friends or walking the dog
2. recreation - walking, running, cycling, exercise
3. relaxing by myself
4. just passing through
5. Other / walking the dog

Answer: 1) leisure and socialization- hangingt out with friends or walking the dog

**6. When spending time in open space during nighttime what is the most important spatial feature that influence the position and means of usage?**

1. urban furniture and pedestrian/bicycle paths
2. greenery and water proximity
3. Lightning
4. Other: \_\_\_\_\_

Answer: 1) urban furniture and pedestrian/bicycle paths

**7. Are you satisfied with the position and overall quality of artificial lightning in these spaces?**  
(Choose grade from 1 to 5; 1-not at all, 5-very satisfied)

Answer: 1

**8. Do you feel comfortable and safe in these spaces during nighttime?**

1. Yes
2. No

Answer: No

The questionnaire No: 191

Are you conducting a survey and or interview?

1. Yes
2. No

Answer: Yes

You have been asked to complete this survey as part of scientific research "*Increasing the livability of open public space during nighttime: the importance of lightning in the waterfront areas*". The study is designed to determine the usage dynamics of the waterfront area. Your responses are entirely voluntary, and you may refuse to complete any part or all of this survey. This survey is designed to be anonymous, meaning that there should be no way to connect your responses with you. Toward that end, please do not sign your name to the survey, or include any information in your responses that makes it easy to identify you. By completing and submitting the survey, you affirm that you are at least 18 years old and that you give your consent to use your answers in this research.

*General information:*

Age:

1. 18-25;
2. 25-40;
3. 40-55;
4. 55+

Answer: 25-40

Gender

1. Female
2. Male

Answer: Male

*PART A: Open space usage:*

**1. Do you use open public space in the waterfront area?**

1. Yes
2. No

Answer: Yes

**2. Time period: When do you use these spaces the most?**

1. in the morning
2. in the afternoon
3. in the evening/during nighttime
4. other: in the morning and in the evening

Answer: 4) other: in the morning and in the evening

*PART B: Nighttime open space usage:*

**3. Frequency: How often do you visit these spaces during nighttime?**

1. very often - every day
2. often - once or twice per week
3. rarely - one or twice per month
4. almost never

Answer: 3) rarely - one or twice per month

**4. Duration: How much time do you usually spend in these places during nighttime?**

1. more than 1 hour
2. around 30 minutes
3. 10-15 minutes
4. couple of minutes

Answer: 1) more than 1 hour

**5. Activity: What type of activities do you engage in these spaces during nighttime?**

1. leisure and socialization- hanging out with friends or walking the dog
2. recreation - walking, running, cycling, exercise
3. relaxing by myself
4. just passing through
5. Other / walking the dog

Answer: 1) leisure and socialization- hangingt out with friends or walking the dog

**6. When spending time in open space during nighttime what is the most important spatial feature that influence the position and means of usage?**

1. urban furniture and pedestrian/bicycle paths
2. greenery and water proximity
3. Lightning
4. Other: \_\_\_\_\_

Answer: 3) Lightning

**7. Are you satisfied with the position and overall quality of artificial lightning in these spaces?**  
(Choose grade from 1 to 5; 1-not at all, 5-very satisfied)

Answer: 2

**8. Do you feel comfortable and safe in these spaces during nighttime?**

1. Yes
2. No

Answer: No

The questionnaire No: 192

Are you conducting a survey and or interview?

1. Yes
2. No

Answer: Yes

You have been asked to complete this survey as part of scientific research "*Increasing the livability of open public space during nighttime: the importance of lightning in the waterfront areas*". The study is designed to determine the usage dynamics of the waterfront area. Your responses are entirely voluntary, and you may refuse to complete any part or all of this survey. This survey is designed to be anonymous, meaning that there should be no way to connect your responses with you. Toward that end, please do not sign your name to the survey, or include any information in your responses that makes it easy to identify you. By completing and submitting the survey, you affirm that you are at least 18 years old and that you give your consent to use your answers in this research.

*General information:*

Age:

1. 18-25;
2. 25-40;
3. 40-55;
4. 55+

Answer: 40-55

Gender

1. Female
2. Male

Answer: Female

*PART A: Open space usage:*

**1. Do you use open public space in the waterfront area?**

1. Yes
2. No

Answer: Yes

**2. Time period: When do you use these spaces the most?**

1. in the morning
2. in the afternoon
3. in the evening/during nighttime
4. other: in the morning and in the evening

Answer: 2) in the afternoon

*PART B: Nighttime open space usage:*

**3. Frequency: How often do you visit these spaces during nighttime?**

1. very often - every day
2. often - once or twice per week
3. rarely - one or twice per month
4. almost never

Answer: 4) almost never

**4. Duration: How much time do you usually spend in these places during nighttime?**

1. more than 1 hour
2. around 30 minutes
3. 10-15 minutes
4. couple of minutes

Answer: 1) more than 1 hour

**5. Activity: What type of activities do you engage in these spaces during nighttime?**

1. leisure and socialization- hanging out with friends or walking the dog
2. recreation - walking, running, cycling, exercise
3. relaxing by myself
4. just passing through
5. Other / walking the dog

Answer: 4) just passing through

**6. When spending time in open space during nighttime what is the most important spatial feature that influence the position and means of usage?**

1. urban furniture and pedestrian/bicycle paths
2. greenery and water proximity
3. Lightning
4. Other: \_\_\_\_\_

Answer: 2) greenery and water proximity

**7. Are you satisfied with the position and overall quality of artificial lightning in these spaces?**  
(Choose grade from 1 to 5; 1-not at all, 5-very satisfied)

Answer: 1

**8. Do you feel comfortable and safe in these spaces during nighttime?**

1. Yes
2. No

Answer: No

The questionnaire No: 193

Are you conducting a survey and or interview?

1. Yes
2. No

Answer: Yes

You have been asked to complete this survey as part of scientific research "*Increasing the livability of open public space during nighttime: the importance of lightning in the waterfront areas*". The study is designed to determine the usage dynamics of the waterfront area. Your responses are entirely voluntary, and you may refuse to complete any part or all of this survey. This survey is designed to be anonymous, meaning that there should be no way to connect your responses with you. Toward that end, please do not sign your name to the survey, or include any information in your responses that makes it easy to identify you. By completing and submitting the survey, you affirm that you are at least 18 years old and that you give your consent to use your answers in this research.

*General information:*

Age:

1. 18-25;
2. 25-40;
3. 40-55;
4. 55+

Answer: 25-40

Gender

1. Female
2. Male

Answer: Female

*PART A: Open space usage:*

**1. Do you use open public space in the waterfront area?**

1. Yes
2. No

Answer: Yes

**2. Time period: When do you use these spaces the most?**

1. in the morning
2. in the afternoon
3. in the evening/during nighttime
4. other: in the morning and in the evening

Answer: 2) in the afternoon

*PART B: Nighttime open space usage:*

**3. Frequency: How often do you visit these spaces during nighttime?**

1. very often - every day
2. often - once or twice per week
3. rarely - one or twice per month
4. almost never

Answer: 4) almost never

**4. Duration: How much time do you usually spend in these places during nighttime?**

1. more than 1 hour
2. around 30 minutes
3. 10-15 minutes
4. couple of minutes

Answer: 1) more than 1 hour

**5. Activity: What type of activities do you engage in these spaces during nighttime?**

1. leisure and socialization- hanging out with friends or walking the dog
2. recreation - walking, running, cycling, exercise
3. relaxing by myself
4. just passing through
5. Other / walking the dog

Answer: Other: walking the dog

**6. When spending time in open space during nighttime what is the most important spatial feature that influence the position and means of usage?**

1. urban furniture and pedestrian/bicycle paths
2. greenery and water proximity
3. Lightning
4. Other: \_\_\_\_\_

Answer: Other: monuments

**7. Are you satisfied with the position and overall quality of artificial lightning in these spaces?**  
(Choose grade from 1 to 5; 1-not at all, 5-very satisfied)

Answer: 3

**8. Do you feel comfortable and safe in these spaces during nighttime?**

1. Yes
2. No

Answer: No

The questionnaire No: 194

Are you conducting a survey and or interview?

1. Yes
2. No

Answer: Yes

You have been asked to complete this survey as part of scientific research "*Increasing the livability of open public space during nighttime: the importance of lightning in the waterfront areas*". The study is designed to determine the usage dynamics of the waterfront area. Your responses are entirely voluntary, and you may refuse to complete any part or all of this survey. This survey is designed to be anonymous, meaning that there should be no way to connect your responses with you. Toward that end, please do not sign your name to the survey, or include any information in your responses that makes it easy to identify you. By completing and submitting the survey, you affirm that you are at least 18 years old and that you give your consent to use your answers in this research.

*General information:*

Age:

1. 18-25;
2. 25-40;
3. 40-55;
4. 55+

Answer: 55+

Gender

1. Female
2. Male

Answer: Female

*PART A: Open space usage:*

**1. Do you use open public space in the waterfront area?**

1. Yes
2. No

Answer: Yes

**2. Time period: When do you use these spaces the most?**

1. in the morning
2. in the afternoon
3. in the evening/during nighttime
4. other: in the morning and in the evening

Answer: 3) in the evening/during nighttime

*PART B: Nighttime open space usage:*

**3. Frequency: How often do you visit these spaces during nighttime?**

1. very often - every day
2. often - once or twice per week
3. rarely - one or twice per month
4. almost never

Answer: 3) rarely - one or twice per month

**4. Duration: How much time do you usually spend in these places during nighttime?**

1. more than 1 hour
2. around 30 minutes
3. 10-15 minutes
4. couple of minutes

Answer: 1) more than 1 hour

**5. Activity: What type of activities do you engage in these spaces during nighttime?**

1. leisure and socialization- hanging out with friends or walking the dog
2. recreation - walking, running, cycling, exercise
3. relaxing by myself
4. just passing through
5. Other / walking the dog

Answer: 2) recreation - walking, running, cycling, exercise

**6. When spending time in open space during nighttime what is the most important spatial feature that influence the position and means of usage?**

1. urban furniture and pedestrian/bicycle paths
2. greenery and water proximity
3. Lightning
4. Other: \_\_\_\_\_

Answer: 1) urban furniture and pedestrian/bicycle paths

**7. Are you satisfied with the position and overall quality of artificial lightning in these spaces?**  
(Choose grade from 1 to 5; 1-not at all, 5-very satisfied)

Answer: 3

**8. Do you feel comfortable and safe in these spaces during nighttime?**

1. Yes
2. No

Answer: No

The questionnaire No: 195

Are you conducting a survey and or interview?

1. Yes
2. No

Answer: Yes

You have been asked to complete this survey as part of scientific research "*Increasing the livability of open public space during nighttime: the importance of lightning in the waterfront areas*". The study is designed to determine the usage dynamics of the waterfront area. Your responses are entirely voluntary, and you may refuse to complete any part or all of this survey. This survey is designed to be anonymous, meaning that there should be no way to connect your responses with you. Toward that end, please do not sign your name to the survey, or include any information in your responses that makes it easy to identify you. By completing and submitting the survey, you affirm that you are at least 18 years old and that you give your consent to use your answers in this research.

*General information:*

Age:

1. 18-25;
2. 25-40;
3. 40-55;
4. 55+

Answer: 40-55

Gender

1. Female
2. Male

Answer: Female

*PART A: Open space usage:*

**1. Do you use open public space in the waterfront area?**

1. Yes
2. No

Answer: Yes

**2. Time period: When do you use these spaces the most?**

1. in the morning
2. in the afternoon
3. in the evening/during nighttime
4. other: in the morning and in the evening

Answer: 3) in the evening/during nighttime

*PART B: Nighttime open space usage:*

**3. Frequency: How often do you visit these spaces during nighttime?**

1. very often - every day
2. often - once or twice per week
3. rarely - one or twice per month
4. almost never

Answer: 2) often - once or twice per week

**4. Duration: How much time do you usually spend in these places during nighttime?**

1. more than 1 hour
2. around 30 minutes
3. 10-15 minutes
4. couple of minutes

Answer: 1) more than 1 hour

**5. Activity: What type of activities do you engage in these spaces during nighttime?**

1. leisure and socialization- hanging out with friends or walking the dog
2. recreation - walking, running, cycling, exercise
3. relaxing by myself
4. just passing through
5. Other / walking the dog

Answer: 1) leisure and socialization- hangingt out with friends or walking the dog

**6. When spending time in open space during nighttime what is the most important spatial feature that influence the position and means of usage?**

1. urban furniture and pedestrian/bicycle paths
2. greenery and water proximity
3. Lightning
4. Other: \_\_\_\_\_

Answer: Other: river restaurants

**7. Are you satisfied with the position and overall quality of artificial lightning in these spaces?**  
(Choose grade from 1 to 5; 1-not at all, 5-very satisfied)

Answer: 3

**8. Do you feel comfortable and safe in these spaces during nighttime?**

1. Yes
2. No

Answer: No

The questionnaire No: 196

Are you conducting a survey and or interview?

1. Yes
2. No

Answer: Yes

You have been asked to complete this survey as part of scientific research "*Increasing the livability of open public space during nighttime: the importance of lightning in the waterfront areas*". The study is designed to determine the usage dynamics of the waterfront area. Your responses are entirely voluntary, and you may refuse to complete any part or all of this survey. This survey is designed to be anonymous, meaning that there should be no way to connect your responses with you. Toward that end, please do not sign your name to the survey, or include any information in your responses that makes it easy to identify you. By completing and submitting the survey, you affirm that you are at least 18 years old and that you give your consent to use your answers in this research.

*General information:*

Age:

1. 18-25;
2. 25-40;
3. 40-55;
4. 55+

Answer: 40-55

Gender

1. Female
2. Male

Answer: Male

*PART A: Open space usage:*

**1. Do you use open public space in the waterfront area?**

1. Yes
2. No

Answer: Yes

**2. Time period: When do you use these spaces the most?**

1. in the morning
2. in the afternoon
3. in the evening/during nighttime
4. other: in the morning and in the evening

Answer: 4) other: in the morning and in the evening

*PART B: Nighttime open space usage:*

**3. Frequency: How often do you visit these spaces during nighttime?**

1. very often - every day
2. often - once or twice per week
3. rarely - one or twice per month
4. almost never

Answer: 1) very often - every day

**4. Duration: How much time do you usually spend in these places during nighttime?**

1. more than 1 hour
2. around 30 minutes
3. 10-15 minutes
4. couple of minutes

Answer: 1) more than 1 hour

**5. Activity: What type of activities do you engage in these spaces during nighttime?**

1. leisure and socialization- hanging out with friends or walking the dog
2. recreation - walking, running, cycling, exercise
3. relaxing by myself
4. just passing through
5. Other / walking the dog

Answer: 1) leisure and socialization- hangingt out with friends or walking the dog

**6. When spending time in open space during nighttime what is the most important spatial feature that influence the position and means of usage?**

1. urban furniture and pedestrian/bicycle paths
2. greenery and water proximity
3. Lightning
4. Other: \_\_\_\_\_

Answer: 1) urban furniture and pedestrian/bicycle paths

**7. Are you satisfied with the position and overall quality of artificial lightning in these spaces?**  
(Choose grade from 1 to 5; 1-not at all, 5-very satisfied)

Answer: 3

**8. Do you feel comfortable and safe in these spaces during nighttime?**

1. Yes
2. No

Answer: No

The questionnaire No: 197

Are you conducting a survey and or interview?

1. Yes
2. No

Answer: Yes

You have been asked to complete this survey as part of scientific research "*Increasing the livability of open public space during nighttime: the importance of lightning in the waterfront areas*". The study is designed to determine the usage dynamics of the waterfront area. Your responses are entirely voluntary, and you may refuse to complete any part or all of this survey. This survey is designed to be anonymous, meaning that there should be no way to connect your responses with you. Toward that end, please do not sign your name to the survey, or include any information in your responses that makes it easy to identify you. By completing and submitting the survey, you affirm that you are at least 18 years old and that you give your consent to use your answers in this research.

*General information:*

Age:

1. 18-25;
2. 25-40;
3. 40-55;
4. 55+

Answer: 40-55

Gender

1. Female
2. Male

Answer: Female

*PART A: Open space usage:*

**1. Do you use open public space in the waterfront area?**

1. Yes
2. No

Answer: Yes

**2. Time period: When do you use these spaces the most?**

1. in the morning
2. in the afternoon
3. in the evening/during nighttime
4. other: in the morning and in the evening

Answer: 2) in the afternoon

*PART B: Nighttime open space usage:*

**3. Frequency: How often do you visit these spaces during nighttime?**

1. very often - every day
2. often - once or twice per week
3. rarely - one or twice per month
4. almost never

Answer: 3) rarely - one or twice per month

**4. Duration: How much time do you usually spend in these places during nighttime?**

1. more than 1 hour
2. around 30 minutes
3. 10-15 minutes
4. couple of minutes

Answer: 3) 10-15 minutes

**5. Activity: What type of activities do you engage in these spaces during nighttime?**

1. leisure and socialization- hanging out with friends or walking the dog
2. recreation - walking, running, cycling, exercise
3. relaxing by myself
4. just passing through
5. Other / walking the dog

Answer: Other: walking the dog

**6. When spending time in open space during nighttime what is the most important spatial feature that influence the position and means of usage?**

1. urban furniture and pedestrian/bicycle paths
2. greenery and water proximity
3. Lightning
4. Other: \_\_\_\_\_

Answer: Other: monuments

**7. Are you satisfied with the position and overall quality of artificial lightning in these spaces?**  
(Choose grade from 1 to 5; 1-not at all, 5-very satisfied)

Answer: 3

**8. Do you feel comfortable and safe in these spaces during nighttime?**

1. Yes
2. No

Answer: No

The questionnaire No: 198

Are you conducting a survey and or interview?

1. Yes
2. No

Answer: Yes

You have been asked to complete this survey as part of scientific research "*Increasing the livability of open public space during nighttime: the importance of lightning in the waterfront areas*". The study is designed to determine the usage dynamics of the waterfront area. Your responses are entirely voluntary, and you may refuse to complete any part or all of this survey. This survey is designed to be anonymous, meaning that there should be no way to connect your responses with you. Toward that end, please do not sign your name to the survey, or include any information in your responses that makes it easy to identify you. By completing and submitting the survey, you affirm that you are at least 18 years old and that you give your consent to use your answers in this research.

*General information:*

Age:

1. 18-25;
2. 25-40;
3. 40-55;
4. 55+

Answer: 18-25

Gender

1. Female
2. Male

Answer: Female

*PART A: Open space usage:*

**1. Do you use open public space in the waterfront area?**

1. Yes
2. No

Answer: No

**2. Time period: When do you use these spaces the most?**

1. in the morning
2. in the afternoon
3. in the evening/during nighttime
4. other: in the morning and in the evening

Answer: 2) in the afternoon

*PART B: Nighttime open space usage:*

**3. Frequency: How often do you visit these spaces during nighttime?**

1. very often - every day
2. often - once or twice per week
3. rarely - one or twice per month
4. almost never

Answer: 3) rarely - one or twice per month

**4. Duration: How much time do you usually spend in these places during nighttime?**

1. more than 1 hour
2. around 30 minutes
3. 10-15 minutes
4. couple of minutes

Answer: 2) around 30 minutes

**5. Activity: What type of activities do you engage in these spaces during nighttime?**

1. leisure and socialization- hanging out with friends or walking the dog
2. recreation - walking, running, cycling, exercise
3. relaxing by myself
4. just passing through
5. Other / walking the dog

Answer: 1) leisure and socialization- hangingt out with friends or walking the dog

**6. When spending time in open space during nighttime what is the most important spatial feature that influence the position and means of usage?**

1. urban furniture and pedestrian/bicycle paths
2. greenery and water proximity
3. Lightning
4. Other: \_\_\_\_\_

Answer: Other: monuments

**7. Are you satisfied with the position and overall quality of artificial lightning in these spaces?**  
(Choose grade from 1 to 5; 1-not at all, 5-very satisfied)

Answer: 3

**8. Do you feel comfortable and safe in these spaces during nighttime?**

1. Yes
2. No

Answer: No

The questionnaire No: 199

Are you conducting a survey and or interview?

1. Yes
2. No

Answer: Yes

You have been asked to complete this survey as part of scientific research "*Increasing the livability of open public space during nighttime: the importance of lightning in the waterfront areas*". The study is designed to determine the usage dynamics of the waterfront area. Your responses are entirely voluntary, and you may refuse to complete any part or all of this survey. This survey is designed to be anonymous, meaning that there should be no way to connect your responses with you. Toward that end, please do not sign your name to the survey, or include any information in your responses that makes it easy to identify you. By completing and submitting the survey, you affirm that you are at least 18 years old and that you give your consent to use your answers in this research.

*General information:*

Age:

1. 18-25;
2. 25-40;
3. 40-55;
4. 55+

Answer: 40-55

Gender

1. Female
2. Male

Answer: Female

*PART A: Open space usage:*

**1. Do you use open public space in the waterfront area?**

1. Yes
2. No

Answer: Yes

**2. Time period: When do you use these spaces the most?**

1. in the morning
2. in the afternoon
3. in the evening/during nighttime
4. other: in the morning and in the evening

Answer: 2) in the afternoon

*PART B: Nighttime open space usage:*

**3. Frequency: How often do you visit these spaces during nighttime?**

1. very often - every day
2. often - once or twice per week
3. rarely - one or twice per month
4. almost never

Answer: 1) very often - every day

**4. Duration: How much time do you usually spend in these places during nighttime?**

1. more than 1 hour
2. around 30 minutes
3. 10-15 minutes
4. couple of minutes

Answer: 2) around 30 minutes

**5. Activity: What type of activities do you engage in these spaces during nighttime?**

1. leisure and socialization- hanging out with friends or walking the dog
2. recreation - walking, running, cycling, exercise
3. relaxing by myself
4. just passing through
5. Other / walking the dog

Answer: 4) just passing through

**6. When spending time in open space during nighttime what is the most important spatial feature that influence the position and means of usage?**

1. urban furniture and pedestrian/bicycle paths
2. greenery and water proximity
3. Lightning
4. Other: \_\_\_\_\_

Answer: 3) Lightning

**7. Are you satisfied with the position and overall quality of artificial lightning in these spaces?**  
(Choose grade from 1 to 5; 1-not at all, 5-very satisfied)

Answer: 3

**8. Do you feel comfortable and safe in these spaces during nighttime?**

1. Yes
2. No

Answer: Yes

The questionnaire No: 200

Are you conducting a survey and or interview?

1. Yes
2. No

Answer: Yes

You have been asked to complete this survey as part of scientific research "*Increasing the livability of open public space during nighttime: the importance of lightning in the waterfront areas*". The study is designed to determine the usage dynamics of the waterfront area. Your responses are entirely voluntary, and you may refuse to complete any part or all of this survey. This survey is designed to be anonymous, meaning that there should be no way to connect your responses with you. Toward that end, please do not sign your name to the survey, or include any information in your responses that makes it easy to identify you. By completing and submitting the survey, you affirm that you are at least 18 years old and that you give your consent to use your answers in this research.

*General information:*

Age:

1. 18-25;
2. 25-40;
3. 40-55;
4. 55+

Answer: 25-40

Gender

1. Female
2. Male

Answer: Male

*PART A: Open space usage:*

**1. Do you use open public space in the waterfront area?**

1. Yes
2. No

Answer: Yes

**2. Time period: When do you use these spaces the most?**

1. in the morning
2. in the afternoon
3. in the evening/during nighttime
4. other: in the morning and in the evening

Answer: 2) in the afternoon

*PART B: Nighttime open space usage:*

**3. Frequency: How often do you visit these spaces during nighttime?**

1. very often - every day
2. often - once or twice per week
3. rarely - one or twice per month
4. almost never

Answer: 2) often - once or twice per week

**4. Duration: How much time do you usually spend in these places during nighttime?**

1. more than 1 hour
2. around 30 minutes
3. 10-15 minutes
4. couple of minutes

Answer: 1) more than 1 hour

**5. Activity: What type of activities do you engage in these spaces during nighttime?**

1. leisure and socialization- hanging out with friends or walking the dog
2. recreation - walking, running, cycling, exercise
3. relaxing by myself
4. just passing through
5. Other / walking the dog

Answer: 3) relaxing by myself

**6. When spending time in open space during nighttime what is the most important spatial feature that influence the position and means of usage?**

1. urban furniture and pedestrian/bicycle paths
2. greenery and water proximity
3. Lightning
4. Other: \_\_\_\_\_

Answer: Other: river restaurants

**7. Are you satisfied with the position and overall quality of artificial lightning in these spaces?**  
(Choose grade from 1 to 5; 1-not at all, 5-very satisfied)

Answer: 2

**8. Do you feel comfortable and safe in these spaces during nighttime?**

1. Yes
2. No

Answer: No

The questionnaire No: 201

Are you conducting a survey and or interview?

1. Yes
2. No

Answer: Yes

You have been asked to complete this survey as part of scientific research "*Increasing the livability of open public space during nighttime: the importance of lightning in the waterfront areas*". The study is designed to determine the usage dynamics of the waterfront area. Your responses are entirely voluntary, and you may refuse to complete any part or all of this survey. This survey is designed to be anonymous, meaning that there should be no way to connect your responses with you. Toward that end, please do not sign your name to the survey, or include any information in your responses that makes it easy to identify you. By completing and submitting the survey, you affirm that you are at least 18 years old and that you give your consent to use your answers in this research.

*General information:*

Age:

1. 18-25;
2. 25-40;
3. 40-55;
4. 55+

Answer: 40-55

Gender

1. Female
2. Male

Answer: Female

*PART A: Open space usage:*

**1. Do you use open public space in the waterfront area?**

1. Yes
2. No

Answer: Yes

**2. Time period: When do you use these spaces the most?**

1. in the morning
2. in the afternoon
3. in the evening/during nighttime
4. other: in the morning and in the evening

Answer: 3) in the evening/during nighttime

The questionnaire No: 201

*PART B: Nighttime open space usage:*

**3. Frequency: How often do you visit these spaces during nighttime?**

1. very often - every day
2. often - once or twice per week
3. rarely - one or twice per month
4. almost never

Answer: 2) often - once or twice per week

**4. Duration: How much time do you usually spend in these places during nighttime?**

1. more than 1 hour
2. around 30 minutes
3. 10-15 minutes
4. couple of minutes

Answer: 1) more than 1 hour

**5. Activity: What type of activities do you engage in these spaces during nighttime?**

1. leisure and socialization- hanging out with friends or walking the dog
2. recreation - walking, running, cycling, exercise
3. relaxing by myself
4. just passing through
5. Other / walking the dog

Answer: 4) just passing through

**6. When spending time in open space during nighttime what is the most important spatial feature that influence the position and means of usage?**

1. urban furniture and pedestrian/bicycle paths
2. greenery and water proximity
3. Lightning
4. Other: \_\_\_\_\_

Answer: Other: monuments

**7. Are you satisfied with the position and overall quality of artificial lightning in these spaces?**  
(Choose grade from 1 to 5; 1-not at all, 5-very satisfied)

Answer: 1

**8. Do you feel comfortable and safe in these spaces during nighttime?**

1. Yes
2. No

Answer: Yes

The questionnaire No: 202

Are you conducting a survey and or interview?

1. Yes
2. No

Answer: Yes

You have been asked to complete this survey as part of scientific research "*Increasing the livability of open public space during nighttime: the importance of lightning in the waterfront areas*". The study is designed to determine the usage dynamics of the waterfront area. Your responses are entirely voluntary, and you may refuse to complete any part or all of this survey. This survey is designed to be anonymous, meaning that there should be no way to connect your responses with you. Toward that end, please do not sign your name to the survey, or include any information in your responses that makes it easy to identify you. By completing and submitting the survey, you affirm that you are at least 18 years old and that you give your consent to use your answers in this research.

*General information:*

Age:

1. 18-25;
2. 25-40;
3. 40-55;
4. 55+

Answer: 40-55

Gender

1. Female
2. Male

Answer: Female

*PART A: Open space usage:*

**1. Do you use open public space in the waterfront area?**

1. Yes
2. No

Answer: Yes

**2. Time period: When do you use these spaces the most?**

1. in the morning
2. in the afternoon
3. in the evening/during nighttime
4. other: in the morning and in the evening

Answer: 2) in the afternoon

*PART B: Nighttime open space usage:*

**3. Frequency: How often do you visit these spaces during nighttime?**

1. very often - every day
2. often - once or twice per week
3. rarely - one or twice per month
4. almost never

Answer: 3) rarely - one or twice per month

**4. Duration: How much time do you usually spend in these places during nighttime?**

1. more than 1 hour
2. around 30 minutes
3. 10-15 minutes
4. couple of minutes

Answer: 2) around 30 minutes

**5. Activity: What type of activities do you engage in these spaces during nighttime?**

1. leisure and socialization- hanging out with friends or walking the dog
2. recreation - walking, running, cycling, exercise
3. relaxing by myself
4. just passing through
5. Other / walking the dog

Answer: 3) relaxing by myself

**6. When spending time in open space during nighttime what is the most important spatial feature that influence the position and means of usage?**

1. urban furniture and pedestrian/bicycle paths
2. greenery and water proximity
3. Lightning
4. Other: \_\_\_\_\_

Answer: 3) Lightning

**7. Are you satisfied with the position and overall quality of artificial lightning in these spaces?**  
(Choose grade from 1 to 5; 1-not at all, 5-very satisfied)

Answer: 2

**8. Do you feel comfortable and safe in these spaces during nighttime?**

1. Yes
2. No

Answer: No

The questionnaire No: 203

Are you conducting a survey and or interview?

1. Yes
2. No

Answer: Yes

You have been asked to complete this survey as part of scientific research "*Increasing the livability of open public space during nighttime: the importance of lightning in the waterfront areas*". The study is designed to determine the usage dynamics of the waterfront area. Your responses are entirely voluntary, and you may refuse to complete any part or all of this survey. This survey is designed to be anonymous, meaning that there should be no way to connect your responses with you. Toward that end, please do not sign your name to the survey, or include any information in your responses that makes it easy to identify you. By completing and submitting the survey, you affirm that you are at least 18 years old and that you give your consent to use your answers in this research.

*General information:*

Age:

1. 18-25;
2. 25-40;
3. 40-55;
4. 55+

Answer: 40-55

Gender

1. Female
2. Male

Answer: Female

*PART A: Open space usage:*

**1. Do you use open public space in the waterfront area?**

1. Yes
2. No

Answer: Yes

**2. Time period: When do you use these spaces the most?**

1. in the morning
2. in the afternoon
3. in the evening/during nighttime
4. other: in the morning and in the evening

Answer: 4) other: in the morning and in the evening

The questionnaire No: 203

*PART B: Nighttime open space usage:*

**3. Frequency: How often do you visit these spaces during nighttime?**

1. very often - every day
2. often - once or twice per week
3. rarely - one or twice per month
4. almost never

Answer: 3) rarely - one or twice per month

**4. Duration: How much time do you usually spend in these places during nighttime?**

1. more than 1 hour
2. around 30 minutes
3. 10-15 minutes
4. couple of minutes

Answer: 2) around 30 minutes

**5. Activity: What type of activities do you engage in these spaces during nighttime?**

1. leisure and socialization- hanging out with friends or walking the dog
2. recreation - walking, running, cycling, exercise
3. relaxing by myself
4. just passing through
5. Other / walking the dog

Answer: 4) just passing through

**6. When spending time in open space during nighttime what is the most important spatial feature that influence the position and means of usage?**

1. urban furniture and pedestrian/bicycle paths
2. greenery and water proximity
3. Lightning
4. Other: \_\_\_\_\_

Answer: Other: river restaurants

**7. Are you satisfied with the position and overall quality of artificial lightning in these spaces?**  
(Choose grade from 1 to 5; 1-not at all, 5-very satisfied)

Answer: 2

**8. Do you feel comfortable and safe in these spaces during nighttime?**

1. Yes
2. No

Answer: No

The questionnaire No: 204

Are you conducting a survey and or interview?

1. Yes
2. No

Answer: Yes

You have been asked to complete this survey as part of scientific research "*Increasing the livability of open public space during nighttime: the importance of lightning in the waterfront areas*". The study is designed to determine the usage dynamics of the waterfront area. Your responses are entirely voluntary, and you may refuse to complete any part or all of this survey. This survey is designed to be anonymous, meaning that there should be no way to connect your responses with you. Toward that end, please do not sign your name to the survey, or include any information in your responses that makes it easy to identify you. By completing and submitting the survey, you affirm that you are at least 18 years old and that you give your consent to use your answers in this research.

*General information:*

Age:

1. 18-25;
2. 25-40;
3. 40-55;
4. 55+

Answer: 40-55

Gender

1. Female
2. Male

Answer: Female

*PART A: Open space usage:*

**1. Do you use open public space in the waterfront area?**

1. Yes
2. No

Answer: Yes

**2. Time period: When do you use these spaces the most?**

1. in the morning
2. in the afternoon
3. in the evening/during nighttime
4. other: in the morning and in the evening

Answer: 4) other: in the morning and in the evening

*PART B: Nighttime open space usage:*

**3. Frequency: How often do you visit these spaces during nighttime?**

1. very often - every day
2. often - once or twice per week
3. rarely - one or twice per month
4. almost never

Answer: 2) often - once or twice per week

**4. Duration: How much time do you usually spend in these places during nighttime?**

1. more than 1 hour
2. around 30 minutes
3. 10-15 minutes
4. couple of minutes

Answer: 1) more than 1 hour

**5. Activity: What type of activities do you engage in these spaces during nighttime?**

1. leisure and socialization- hanging out with friends or walking the dog
2. recreation - walking, running, cycling, exercise
3. relaxing by myself
4. just passing through
5. Other / walking the dog

Answer: 4) just passing through

**6. When spending time in open space during nighttime what is the most important spatial feature that influence the position and means of usage?**

1. urban furniture and pedestrian/bicycle paths
2. greenery and water proximity
3. Lightning
4. Other: \_\_\_\_\_

Answer: 2) greenery and water proximity

**7. Are you satisfied with the position and overall quality of artificial lightning in these spaces?**  
(Choose grade from 1 to 5; 1-not at all, 5-very satisfied)

Answer: 4

**8. Do you feel comfortable and safe in these spaces during nighttime?**

1. Yes
2. No

Answer: Yes

The questionnaire No: 205

Are you conducting a survey and or interview?

1. Yes
2. No

Answer: Yes

You have been asked to complete this survey as part of scientific research "*Increasing the livability of open public space during nighttime: the importance of lightning in the waterfront areas*". The study is designed to determine the usage dynamics of the waterfront area. Your responses are entirely voluntary, and you may refuse to complete any part or all of this survey. This survey is designed to be anonymous, meaning that there should be no way to connect your responses with you. Toward that end, please do not sign your name to the survey, or include any information in your responses that makes it easy to identify you. By completing and submitting the survey, you affirm that you are at least 18 years old and that you give your consent to use your answers in this research.

*General information:*

Age:

1. 18-25;
2. 25-40;
3. 40-55;
4. 55+

Answer: 40-55

Gender

1. Female
2. Male

Answer: Female

*PART A: Open space usage:*

**1. Do you use open public space in the waterfront area?**

1. Yes
2. No

Answer: Yes

**2. Time period: When do you use these spaces the most?**

1. in the morning
2. in the afternoon
3. in the evening/during nighttime
4. other: in the morning and in the evening

Answer: 3) in the evening/during nighttime

*PART B: Nighttime open space usage:*

**3. Frequency: How often do you visit these spaces during nighttime?**

1. very often - every day
2. often - once or twice per week
3. rarely - one or twice per month
4. almost never

Answer: 2) often - once or twice per week

**4. Duration: How much time do you usually spend in these places during nighttime?**

1. more than 1 hour
2. around 30 minutes
3. 10-15 minutes
4. couple of minutes

Answer: 3) 10-15 minutes

**5. Activity: What type of activities do you engage in these spaces during nighttime?**

1. leisure and socialization- hanging out with friends or walking the dog
2. recreation - walking, running, cycling, exercise
3. relaxing by myself
4. just passing through
5. Other / walking the dog

Answer: 2) recreation - walking, running, cycling, exercise

**6. When spending time in open space during nighttime what is the most important spatial feature that influence the position and means of usage?**

1. urban furniture and pedestrian/bicycle paths
2. greenery and water proximity
3. Lightning
4. Other: \_\_\_\_\_

Answer: Other: monuments

**7. Are you satisfied with the position and overall quality of artificial lightning in these spaces?**  
(Choose grade from 1 to 5; 1-not at all, 5-very satisfied)

Answer: 3

**8. Do you feel comfortable and safe in these spaces during nighttime?**

1. Yes
2. No

Answer: Yes

The questionnaire No: 206

Are you conducting a survey and or interview?

1. Yes
2. No

Answer: Yes

You have been asked to complete this survey as part of scientific research "*Increasing the livability of open public space during nighttime: the importance of lightning in the waterfront areas*". The study is designed to determine the usage dynamics of the waterfront area. Your responses are entirely voluntary, and you may refuse to complete any part or all of this survey. This survey is designed to be anonymous, meaning that there should be no way to connect your responses with you. Toward that end, please do not sign your name to the survey, or include any information in your responses that makes it easy to identify you. By completing and submitting the survey, you affirm that you are at least 18 years old and that you give your consent to use your answers in this research.

*General information:*

Age:

1. 18-25;
2. 25-40;
3. 40-55;
4. 55+

Answer: 25-40

Gender

1. Female
2. Male

Answer: Female

*PART A: Open space usage:*

**1. Do you use open public space in the waterfront area?**

1. Yes
2. No

Answer: No

**2. Time period: When do you use these spaces the most?**

1. in the morning
2. in the afternoon
3. in the evening/during nighttime
4. other: in the morning and in the evening

Answer: 4) other: in the morning and in the evening

*PART B: Nighttime open space usage:*

**3. Frequency: How often do you visit these spaces during nighttime?**

1. very often - every day
2. often - once or twice per week
3. rarely - one or twice per month
4. almost never

Answer: 4) almost never

**4. Duration: How much time do you usually spend in these places during nighttime?**

1. more than 1 hour
2. around 30 minutes
3. 10-15 minutes
4. couple of minutes

Answer: 1) more than 1 hour

**5. Activity: What type of activities do you engage in these spaces during nighttime?**

1. leisure and socialization- hanging out with friends or walking the dog
2. recreation - walking, running, cycling, exercise
3. relaxing by myself
4. just passing through
5. Other / walking the dog

Answer: 4) just passing through

**6. When spending time in open space during nighttime what is the most important spatial feature that influence the position and means of usage?**

1. urban furniture and pedestrian/bicycle paths
2. greenery and water proximity
3. Lightning
4. Other: \_\_\_\_\_

Answer: 3) Lightning

**7. Are you satisfied with the position and overall quality of artificial lightning in these spaces?**  
(Choose grade from 1 to 5; 1-not at all, 5-very satisfied)

Answer: 3

**8. Do you feel comfortable and safe in these spaces during nighttime?**

1. Yes
2. No

Answer: No

The questionnaire No: 207

Are you conducting a survey and or interview?

1. Yes
2. No

Answer: Yes

You have been asked to complete this survey as part of scientific research "*Increasing the livability of open public space during nighttime: the importance of lightning in the waterfront areas*". The study is designed to determine the usage dynamics of the waterfront area. Your responses are entirely voluntary, and you may refuse to complete any part or all of this survey. This survey is designed to be anonymous, meaning that there should be no way to connect your responses with you. Toward that end, please do not sign your name to the survey, or include any information in your responses that makes it easy to identify you. By completing and submitting the survey, you affirm that you are at least 18 years old and that you give your consent to use your answers in this research.

*General information:*

Age:

1. 18-25;
2. 25-40;
3. 40-55;
4. 55+

Answer: 25-40

Gender

1. Female
2. Male

Answer: Female

*PART A: Open space usage:*

**1. Do you use open public space in the waterfront area?**

1. Yes
2. No

Answer: Yes

**2. Time period: When do you use these spaces the most?**

1. in the morning
2. in the afternoon
3. in the evening/during nighttime
4. other: in the morning and in the evening

Answer: 4) other: in the morning and in the evening

*PART B: Nighttime open space usage:*

**3. Frequency: How often do you visit these spaces during nighttime?**

1. very often - every day
2. often - once or twice per week
3. rarely - one or twice per month
4. almost never

Answer: 1) very often - every day

**4. Duration: How much time do you usually spend in these places during nighttime?**

1. more than 1 hour
2. around 30 minutes
3. 10-15 minutes
4. couple of minutes

Answer: 2) around 30 minutes

**5. Activity: What type of activities do you engage in these spaces during nighttime?**

1. leisure and socialization- hanging out with friends or walking the dog
2. recreation - walking, running, cycling, exercise
3. relaxing by myself
4. just passing through
5. Other / walking the dog

Answer: 2) recreation - walking, running, cycling, exercise

**6. When spending time in open space during nighttime what is the most important spatial feature that influence the position and means of usage?**

1. urban furniture and pedestrian/bicycle paths
2. greenery and water proximity
3. Lightning
4. Other: \_\_\_\_\_

Answer: 2) greenery and water proximity

**7. Are you satisfied with the position and overall quality of artificial lightning in these spaces?**  
(Choose grade from 1 to 5; 1-not at all, 5-very satisfied)

Answer: 3

**8. Do you feel comfortable and safe in these spaces during nighttime?**

1. Yes
2. No

Answer: Yes

The questionnaire No: 208

Are you conducting a survey and or interview?

1. Yes
2. No

Answer: Yes

You have been asked to complete this survey as part of scientific research "*Increasing the livability of open public space during nighttime: the importance of lightning in the waterfront areas*". The study is designed to determine the usage dynamics of the waterfront area. Your responses are entirely voluntary, and you may refuse to complete any part or all of this survey. This survey is designed to be anonymous, meaning that there should be no way to connect your responses with you. Toward that end, please do not sign your name to the survey, or include any information in your responses that makes it easy to identify you. By completing and submitting the survey, you affirm that you are at least 18 years old and that you give your consent to use your answers in this research.

*General information:*

Age:

1. 18-25;
2. 25-40;
3. 40-55;
4. 55+

Answer: 40-55

Gender

1. Female
2. Male

Answer: Female

*PART A: Open space usage:*

**1. Do you use open public space in the waterfront area?**

1. Yes
2. No

Answer: Yes

**2. Time period: When do you use these spaces the most?**

1. in the morning
2. in the afternoon
3. in the evening/during nighttime
4. other: in the morning and in the evening

Answer: 3) in the evening/during nighttime

*PART B: Nighttime open space usage:*

**3. Frequency: How often do you visit these spaces during nighttime?**

1. very often - every day
2. often - once or twice per week
3. rarely - one or twice per month
4. almost never

Answer: 1) very often - every day

**4. Duration: How much time do you usually spend in these places during nighttime?**

1. more than 1 hour
2. around 30 minutes
3. 10-15 minutes
4. couple of minutes

Answer: 1) more than 1 hour

**5. Activity: What type of activities do you engage in these spaces during nighttime?**

1. leisure and socialization- hanging out with friends or walking the dog
2. recreation - walking, running, cycling, exercise
3. relaxing by myself
4. just passing through
5. Other / walking the dog

Answer: 1) leisure and socialization- hangingt out with friends or walking the dog

**6. When spending time in open space during nighttime what is the most important spatial feature that influence the position and means of usage?**

1. urban furniture and pedestrian/bicycle paths
2. greenery and water proximity
3. Lightning
4. Other: \_\_\_\_\_

Answer: 3) Lightning

**7. Are you satisfied with the position and overall quality of artificial lightning in these spaces?**  
(Choose grade from 1 to 5; 1-not at all, 5-very satisfied)

Answer: 1

**8. Do you feel comfortable and safe in these spaces during nighttime?**

1. Yes
2. No

Answer: Yes

The questionnaire No: 209

Are you conducting a survey and or interview?

1. Yes
2. No

Answer: Yes

You have been asked to complete this survey as part of scientific research "*Increasing the livability of open public space during nighttime: the importance of lightning in the waterfront areas*". The study is designed to determine the usage dynamics of the waterfront area. Your responses are entirely voluntary, and you may refuse to complete any part or all of this survey. This survey is designed to be anonymous, meaning that there should be no way to connect your responses with you. Toward that end, please do not sign your name to the survey, or include any information in your responses that makes it easy to identify you. By completing and submitting the survey, you affirm that you are at least 18 years old and that you give your consent to use your answers in this research.

*General information:*

Age:

1. 18-25;
2. 25-40;
3. 40-55;
4. 55+

Answer: 25-40

Gender

1. Female
2. Male

Answer: Female

*PART A: Open space usage:*

**1. Do you use open public space in the waterfront area?**

1. Yes
2. No

Answer: No

**2. Time period: When do you use these spaces the most?**

1. in the morning
2. in the afternoon
3. in the evening/during nighttime
4. other: in the morning and in the evening

Answer: 3) in the evening/during nighttime

*PART B: Nighttime open space usage:*

**3. Frequency: How often do you visit these spaces during nighttime?**

1. very often - every day
2. often - once or twice per week
3. rarely - one or twice per month
4. almost never

Answer: 3) rarely - one or twice per month

**4. Duration: How much time do you usually spend in these places during nighttime?**

1. more than 1 hour
2. around 30 minutes
3. 10-15 minutes
4. couple of minutes

Answer: 2) around 30 minutes

**5. Activity: What type of activities do you engage in these spaces during nighttime?**

1. leisure and socialization- hanging out with friends or walking the dog
2. recreation - walking, running, cycling, exercise
3. relaxing by myself
4. just passing through
5. Other / walking the dog

Answer: 4) just passing through

**6. When spending time in open space during nighttime what is the most important spatial feature that influence the position and means of usage?**

1. urban furniture and pedestrian/bicycle paths
2. greenery and water proximity
3. Lightning
4. Other: \_\_\_\_\_

Answer: 3) Lightning

**7. Are you satisfied with the position and overall quality of artificial lightning in these spaces?**  
(Choose grade from 1 to 5; 1-not at all, 5-very satisfied)

Answer: 2

**8. Do you feel comfortable and safe in these spaces during nighttime?**

1. Yes
2. No

Answer: No

The questionnaire No: 210

Are you conducting a survey and or interview?

1. Yes
2. No

Answer: Yes

You have been asked to complete this survey as part of scientific research "*Increasing the livability of open public space during nighttime: the importance of lightning in the waterfront areas*". The study is designed to determine the usage dynamics of the waterfront area. Your responses are entirely voluntary, and you may refuse to complete any part or all of this survey. This survey is designed to be anonymous, meaning that there should be no way to connect your responses with you. Toward that end, please do not sign your name to the survey, or include any information in your responses that makes it easy to identify you. By completing and submitting the survey, you affirm that you are at least 18 years old and that you give your consent to use your answers in this research.

*General information:*

Age:

1. 18-25;
2. 25-40;
3. 40-55;
4. 55+

Answer: 40-55

Gender

1. Female
2. Male

Answer: Female

*PART A: Open space usage:*

**1. Do you use open public space in the waterfront area?**

1. Yes
2. No

Answer: Yes

**2. Time period: When do you use these spaces the most?**

1. in the morning
2. in the afternoon
3. in the evening/during nighttime
4. other: in the morning and in the evening

Answer: 3) in the evening/during nighttime

The questionnaire No: 210

*PART B: Nighttime open space usage:*

**3. Frequency: How often do you visit these spaces during nighttime?**

1. very often - every day
2. often - once or twice per week
3. rarely - one or twice per month
4. almost never

Answer: 3) rarely - one or twice per month

**4. Duration: How much time do you usually spend in these places during nighttime?**

1. more than 1 hour
2. around 30 minutes
3. 10-15 minutes
4. couple of minutes

Answer: 1) more than 1 hour

**5. Activity: What type of activities do you engage in these spaces during nighttime?**

1. leisure and socialization- hanging out with friends or walking the dog
2. recreation - walking, running, cycling, exercise
3. relaxing by myself
4. just passing through
5. Other / walking the dog

Answer: 1) leisure and socialization- hangingt out with friends or walking the dog

**6. When spending time in open space during nighttime what is the most important spatial feature that influence the position and means of usage?**

1. urban furniture and pedestrian/bicycle paths
2. greenery and water proximity
3. Lightning
4. Other: \_\_\_\_\_

Answer: 3) Lightning

**7. Are you satisfied with the position and overall quality of artificial lightning in these spaces?**  
(Choose grade from 1 to 5; 1-not at all, 5-very satisfied)

Answer: 3

**8. Do you feel comfortable and safe in these spaces during nighttime?**

1. Yes
2. No

Answer: No

The questionnaire No: 211

Are you conducting a survey and or interview?

1. Yes
2. No

Answer: Yes

You have been asked to complete this survey as part of scientific research "*Increasing the livability of open public space during nighttime: the importance of lightning in the waterfront areas*". The study is designed to determine the usage dynamics of the waterfront area. Your responses are entirely voluntary, and you may refuse to complete any part or all of this survey. This survey is designed to be anonymous, meaning that there should be no way to connect your responses with you. Toward that end, please do not sign your name to the survey, or include any information in your responses that makes it easy to identify you. By completing and submitting the survey, you affirm that you are at least 18 years old and that you give your consent to use your answers in this research.

*General information:*

Age:

1. 18-25;
2. 25-40;
3. 40-55;
4. 55+

Answer: 18-25

Gender

1. Female
2. Male

Answer: Male

*PART A: Open space usage:*

**1. Do you use open public space in the waterfront area?**

1. Yes
2. No

Answer: Yes

**2. Time period: When do you use these spaces the most?**

1. in the morning
2. in the afternoon
3. in the evening/during nighttime
4. other: in the morning and in the evening

Answer: 1) in the morning

The questionnaire No: 211

*PART B: Nighttime open space usage:*

**3. Frequency: How often do you visit these spaces during nighttime?**

1. very often - every day
2. often - once or twice per week
3. rarely - one or twice per month
4. almost never

Answer: 3) rarely - one or twice per month

**4. Duration: How much time do you usually spend in these places during nighttime?**

1. more than 1 hour
2. around 30 minutes
3. 10-15 minutes
4. couple of minutes

Answer: 3) 10-15 minutes

**5. Activity: What type of activities do you engage in these spaces during nighttime?**

1. leisure and socialization- hanging out with friends or walking the dog
2. recreation - walking, running, cycling, exercise
3. relaxing by myself
4. just passing through
5. Other / walking the dog

Answer: 1) leisure and socialization- hangingt out with friends or walking the dog

**6. When spending time in open space during nighttime what is the most important spatial feature that influence the position and means of usage?**

1. urban furniture and pedestrian/bicycle paths
2. greenery and water proximity
3. Lightning
4. Other: \_\_\_\_\_

Answer: 3) Lightning

**7. Are you satisfied with the position and overall quality of artificial lightning in these spaces?**  
(Choose grade from 1 to 5; 1-not at all, 5-very satisfied)

Answer: 2

**8. Do you feel comfortable and safe in these spaces during nighttime?**

1. Yes
2. No

Answer: No

The questionnaire No: 212

Are you conducting a survey and or interview?

1. Yes
2. No

Answer: Yes

You have been asked to complete this survey as part of scientific research "*Increasing the livability of open public space during nighttime: the importance of lightning in the waterfront areas*". The study is designed to determine the usage dynamics of the waterfront area. Your responses are entirely voluntary, and you may refuse to complete any part or all of this survey. This survey is designed to be anonymous, meaning that there should be no way to connect your responses with you. Toward that end, please do not sign your name to the survey, or include any information in your responses that makes it easy to identify you. By completing and submitting the survey, you affirm that you are at least 18 years old and that you give your consent to use your answers in this research.

*General information:*

Age:

1. 18-25;
2. 25-40;
3. 40-55;
4. 55+

Answer: 18-25

Gender

1. Female
2. Male

Answer: Female

*PART A: Open space usage:*

**1. Do you use open public space in the waterfront area?**

1. Yes
2. No

Answer: Yes

**2. Time period: When do you use these spaces the most?**

1. in the morning
2. in the afternoon
3. in the evening/during nighttime
4. other: in the morning and in the evening

Answer: 1) in the morning

The questionnaire No: 212

*PART B: Nighttime open space usage:*

**3. Frequency: How often do you visit these spaces during nighttime?**

1. very often - every day
2. often - once or twice per week
3. rarely - one or twice per month
4. almost never

Answer: 3) rarely - one or twice per month

**4. Duration: How much time do you usually spend in these places during nighttime?**

1. more than 1 hour
2. around 30 minutes
3. 10-15 minutes
4. couple of minutes

Answer: 1) more than 1 hour

**5. Activity: What type of activities do you engage in these spaces during nighttime?**

1. leisure and socialization- hanging out with friends or walking the dog
2. recreation - walking, running, cycling, exercise
3. relaxing by myself
4. just passing through
5. Other / walking the dog

Answer: 1) leisure and socialization- hangingt out with friends or walking the dog

**6. When spending time in open space during nighttime what is the most important spatial feature that influence the position and means of usage?**

1. urban furniture and pedestrian/bicycle paths
2. greenery and water proximity
3. Lightning
4. Other: \_\_\_\_\_

Answer: Other: monuments

**7. Are you satisfied with the position and overall quality of artificial lightning in these spaces?**  
(Choose grade from 1 to 5; 1-not at all, 5-very satisfied)

Answer: 3

**8. Do you feel comfortable and safe in these spaces during nighttime?**

1. Yes
2. No

Answer: No

The questionnaire No: 213

Are you conducting a survey and or interview?

1. Yes
2. No

Answer: Yes

You have been asked to complete this survey as part of scientific research "*Increasing the livability of open public space during nighttime: the importance of lightning in the waterfront areas*". The study is designed to determine the usage dynamics of the waterfront area. Your responses are entirely voluntary, and you may refuse to complete any part or all of this survey. This survey is designed to be anonymous, meaning that there should be no way to connect your responses with you. Toward that end, please do not sign your name to the survey, or include any information in your responses that makes it easy to identify you. By completing and submitting the survey, you affirm that you are at least 18 years old and that you give your consent to use your answers in this research.

*General information:*

Age:

1. 18-25;
2. 25-40;
3. 40-55;
4. 55+

Answer: 18-25

Gender

1. Female
2. Male

Answer: Female

*PART A: Open space usage:*

**1. Do you use open public space in the waterfront area?**

1. Yes
2. No

Answer: Yes

**2. Time period: When do you use these spaces the most?**

1. in the morning
2. in the afternoon
3. in the evening/during nighttime
4. other: in the morning and in the evening

Answer: 1) in the morning

The questionnaire No: 213

*PART B: Nighttime open space usage:*

**3. Frequency: How often do you visit these spaces during nighttime?**

1. very often - every day
2. often - once or twice per week
3. rarely - one or twice per month
4. almost never

Answer: 1) very often - every day

**4. Duration: How much time do you usually spend in these places during nighttime?**

1. more than 1 hour
2. around 30 minutes
3. 10-15 minutes
4. couple of minutes

Answer: 2) around 30 minutes

**5. Activity: What type of activities do you engage in these spaces during nighttime?**

1. leisure and socialization- hanging out with friends or walking the dog
2. recreation - walking, running, cycling, exercise
3. relaxing by myself
4. just passing through
5. Other / walking the dog

Answer: 2) recreation - walking, running, cycling, exercise

**6. When spending time in open space during nighttime what is the most important spatial feature that influence the position and means of usage?**

1. urban furniture and pedestrian/bicycle paths
2. greenery and water proximity
3. Lightning
4. Other: \_\_\_\_\_

Answer: 2) greenery and water proximity

**7. Are you satisfied with the position and overall quality of artificial lightning in these spaces?**  
(Choose grade from 1 to 5; 1-not at all, 5-very satisfied)

Answer: 4

**8. Do you feel comfortable and safe in these spaces during nighttime?**

1. Yes
2. No

Answer: No

The questionnaire No: 214

Are you conducting a survey and or interview?

1. Yes
2. No

Answer: Yes

You have been asked to complete this survey as part of scientific research "*Increasing the livability of open public space during nighttime: the importance of lightning in the waterfront areas*". The study is designed to determine the usage dynamics of the waterfront area. Your responses are entirely voluntary, and you may refuse to complete any part or all of this survey. This survey is designed to be anonymous, meaning that there should be no way to connect your responses with you. Toward that end, please do not sign your name to the survey, or include any information in your responses that makes it easy to identify you. By completing and submitting the survey, you affirm that you are at least 18 years old and that you give your consent to use your answers in this research.

*General information:*

Age:

1. 18-25;
2. 25-40;
3. 40-55;
4. 55+

Answer: 40-55

Gender

1. Female
2. Male

Answer: Female

*PART A: Open space usage:*

**1. Do you use open public space in the waterfront area?**

1. Yes
2. No

Answer: Yes

**2. Time period: When do you use these spaces the most?**

1. in the morning
2. in the afternoon
3. in the evening/during nighttime
4. other: in the morning and in the evening

Answer: 3) in the evening/during nighttime

The questionnaire No: 214

*PART B: Nighttime open space usage:*

**3. Frequency: How often do you visit these spaces during nighttime?**

1. very often - every day
2. often - once or twice per week
3. rarely - one or twice per month
4. almost never

Answer: 1) very often - every day

**4. Duration: How much time do you usually spend in these places during nighttime?**

1. more than 1 hour
2. around 30 minutes
3. 10-15 minutes
4. couple of minutes

Answer: 3) 10-15 minutes

**5. Activity: What type of activities do you engage in these spaces during nighttime?**

1. leisure and socialization- hanging out with friends or walking the dog
2. recreation - walking, running, cycling, exercise
3. relaxing by myself
4. just passing through
5. Other / walking the dog

Answer: 2) recreation - walking, running, cycling, exercise

**6. When spending time in open space during nighttime what is the most important spatial feature that influence the position and means of usage?**

1. urban furniture and pedestrian/bicycle paths
2. greenery and water proximity
3. Lightning
4. Other: \_\_\_\_\_

Answer: 3) Lightning

**7. Are you satisfied with the position and overall quality of artificial lightning in these spaces?**  
(Choose grade from 1 to 5; 1-not at all, 5-very satisfied)

Answer: 2

**8. Do you feel comfortable and safe in these spaces during nighttime?**

1. Yes
2. No

Answer: No

The questionnaire No: 215

Are you conducting a survey and or interview?

1. Yes
2. No

Answer: Yes

You have been asked to complete this survey as part of scientific research "*Increasing the livability of open public space during nighttime: the importance of lightning in the waterfront areas*". The study is designed to determine the usage dynamics of the waterfront area. Your responses are entirely voluntary, and you may refuse to complete any part or all of this survey. This survey is designed to be anonymous, meaning that there should be no way to connect your responses with you. Toward that end, please do not sign your name to the survey, or include any information in your responses that makes it easy to identify you. By completing and submitting the survey, you affirm that you are at least 18 years old and that you give your consent to use your answers in this research.

*General information:*

Age:

1. 18-25;
2. 25-40;
3. 40-55;
4. 55+

Answer: 18-25

Gender

1. Female
2. Male

Answer: Female

*PART A: Open space usage:*

**1. Do you use open public space in the waterfront area?**

1. Yes
2. No

Answer: Yes

**2. Time period: When do you use these spaces the most?**

1. in the morning
2. in the afternoon
3. in the evening/during nighttime
4. other: in the morning and in the evening

Answer: 3) in the evening/during nighttime

*PART B: Nighttime open space usage:*

**3. Frequency: How often do you visit these spaces during nighttime?**

1. very often - every day
2. often - once or twice per week
3. rarely - one or twice per month
4. almost never

Answer: 1) very often - every day

**4. Duration: How much time do you usually spend in these places during nighttime?**

1. more than 1 hour
2. around 30 minutes
3. 10-15 minutes
4. couple of minutes

Answer: 2) around 30 minutes

**5. Activity: What type of activities do you engage in these spaces during nighttime?**

1. leisure and socialization- hanging out with friends or walking the dog
2. recreation - walking, running, cycling, exercise
3. relaxing by myself
4. just passing through
5. Other / walking the dog

Answer: 1) leisure and socialization- hangingt out with friends or walking the dog

**6. When spending time in open space during nighttime what is the most important spatial feature that influence the position and means of usage?**

1. urban furniture and pedestrian/bicycle paths
2. greenery and water proximity
3. Lightning
4. Other: \_\_\_\_\_

Answer: 2) greenery and water proximity

**7. Are you satisfied with the position and overall quality of artificial lightning in these spaces?**  
(Choose grade from 1 to 5; 1-not at all, 5-very satisfied)

Answer: 3

**8. Do you feel comfortable and safe in these spaces during nighttime?**

1. Yes
2. No

Answer: No

The questionnaire No: 216

Are you conducting a survey and or interview?

1. Yes
2. No

Answer: Yes

You have been asked to complete this survey as part of scientific research "*Increasing the livability of open public space during nighttime: the importance of lightning in the waterfront areas*". The study is designed to determine the usage dynamics of the waterfront area. Your responses are entirely voluntary, and you may refuse to complete any part or all of this survey. This survey is designed to be anonymous, meaning that there should be no way to connect your responses with you. Toward that end, please do not sign your name to the survey, or include any information in your responses that makes it easy to identify you. By completing and submitting the survey, you affirm that you are at least 18 years old and that you give your consent to use your answers in this research.

*General information:*

Age:

1. 18-25;
2. 25-40;
3. 40-55;
4. 55+

Answer: 25-40

Gender

1. Female
2. Male

Answer: Female

*PART A: Open space usage:*

**1. Do you use open public space in the waterfront area?**

1. Yes
2. No

Answer: Yes

**2. Time period: When do you use these spaces the most?**

1. in the morning
2. in the afternoon
3. in the evening/during nighttime
4. other: in the morning and in the evening

Answer: 3) in the evening/during nighttime

*PART B: Nighttime open space usage:*

**3. Frequency: How often do you visit these spaces during nighttime?**

1. very often - every day
2. often - once or twice per week
3. rarely - one or twice per month
4. almost never

Answer: 2) often - once or twice per week

**4. Duration: How much time do you usually spend in these places during nighttime?**

1. more than 1 hour
2. around 30 minutes
3. 10-15 minutes
4. couple of minutes

Answer: 1) more than 1 hour

**5. Activity: What type of activities do you engage in these spaces during nighttime?**

1. leisure and socialization- hanging out with friends or walking the dog
2. recreation - walking, running, cycling, exercise
3. relaxing by myself
4. just passing through
5. Other / walking the dog

Answer: 2) recreation - walking, running, cycling, exercise

**6. When spending time in open space during nighttime what is the most important spatial feature that influence the position and means of usage?**

1. urban furniture and pedestrian/bicycle paths
2. greenery and water proximity
3. Lightning
4. Other: \_\_\_\_\_

Answer: 1) urban furniture and pedestrian/bicycle paths

**7. Are you satisfied with the position and overall quality of artificial lightning in these spaces?**  
(Choose grade from 1 to 5; 1-not at all, 5-very satisfied)

Answer: 1

**8. Do you feel comfortable and safe in these spaces during nighttime?**

1. Yes
2. No

Answer: No

The questionnaire No: 217

Are you conducting a survey and or interview?

1. Yes
2. No

Answer: Yes

You have been asked to complete this survey as part of scientific research "*Increasing the livability of open public space during nighttime: the importance of lightning in the waterfront areas*". The study is designed to determine the usage dynamics of the waterfront area. Your responses are entirely voluntary, and you may refuse to complete any part or all of this survey. This survey is designed to be anonymous, meaning that there should be no way to connect your responses with you. Toward that end, please do not sign your name to the survey, or include any information in your responses that makes it easy to identify you. By completing and submitting the survey, you affirm that you are at least 18 years old and that you give your consent to use your answers in this research.

*General information:*

Age:

1. 18-25;
2. 25-40;
3. 40-55;
4. 55+

Answer: 40-55

Gender

1. Female
2. Male

Answer: Male

*PART A: Open space usage:*

**1. Do you use open public space in the waterfront area?**

1. Yes
2. No

Answer: Yes

**2. Time period: When do you use these spaces the most?**

1. in the morning
2. in the afternoon
3. in the evening/during nighttime
4. other: in the morning and in the evening

Answer: 1) in the morning

The questionnaire No: 217

*PART B: Nighttime open space usage:*

**3. Frequency: How often do you visit these spaces during nighttime?**

1. very often - every day
2. often - once or twice per week
3. rarely - one or twice per month
4. almost never

Answer: 2) often - once or twice per week

**4. Duration: How much time do you usually spend in these places during nighttime?**

1. more than 1 hour
2. around 30 minutes
3. 10-15 minutes
4. couple of minutes

Answer: 4) couple of minutes

**5. Activity: What type of activities do you engage in these spaces during nighttime?**

1. leisure and socialization- hanging out with friends or walking the dog
2. recreation - walking, running, cycling, exercise
3. relaxing by myself
4. just passing through
5. Other / walking the dog

Answer: 2) recreation - walking, running, cycling, exercise

**6. When spending time in open space during nighttime what is the most important spatial feature that influence the position and means of usage?**

1. urban furniture and pedestrian/bicycle paths
2. greenery and water proximity
3. Lightning
4. Other: \_\_\_\_\_

Answer: Other: river restaurants

**7. Are you satisfied with the position and overall quality of artificial lightning in these spaces?**  
(Choose grade from 1 to 5; 1-not at all, 5-very satisfied)

Answer: 3

**8. Do you feel comfortable and safe in these spaces during nighttime?**

1. Yes
2. No

Answer: No

The questionnaire No: 218

Are you conducting a survey and or interview?

1. Yes
2. No

Answer: Yes

You have been asked to complete this survey as part of scientific research "*Increasing the livability of open public space during nighttime: the importance of lightning in the waterfront areas*". The study is designed to determine the usage dynamics of the waterfront area. Your responses are entirely voluntary, and you may refuse to complete any part or all of this survey. This survey is designed to be anonymous, meaning that there should be no way to connect your responses with you. Toward that end, please do not sign your name to the survey, or include any information in your responses that makes it easy to identify you. By completing and submitting the survey, you affirm that you are at least 18 years old and that you give your consent to use your answers in this research.

*General information:*

Age:

1. 18-25;
2. 25-40;
3. 40-55;
4. 55+

Answer: 40-55

Gender

1. Female
2. Male

Answer: Female

*PART A: Open space usage:*

**1. Do you use open public space in the waterfront area?**

1. Yes
2. No

Answer: Yes

**2. Time period: When do you use these spaces the most?**

1. in the morning
2. in the afternoon
3. in the evening/during nighttime
4. other: in the morning and in the evening

Answer: 2) in the afternoon

The questionnaire No: 218

*PART B: Nighttime open space usage:*

**3. Frequency: How often do you visit these spaces during nighttime?**

1. very often - every day
2. often - once or twice per week
3. rarely - one or twice per month
4. almost never

Answer: 4) almost never

**4. Duration: How much time do you usually spend in these places during nighttime?**

1. more than 1 hour
2. around 30 minutes
3. 10-15 minutes
4. couple of minutes

Answer: 4) couple of minutes

**5. Activity: What type of activities do you engage in these spaces during nighttime?**

1. leisure and socialization- hanging out with friends or walking the dog
2. recreation - walking, running, cycling, exercise
3. relaxing by myself
4. just passing through
5. Other / walking the dog

Answer: 4) just passing through

**6. When spending time in open space during nighttime what is the most important spatial feature that influence the position and means of usage?**

1. urban furniture and pedestrian/bicycle paths
2. greenery and water proximity
3. Lightning
4. Other: \_\_\_\_\_

Answer: 1) urban furniture and pedestrian/bicycle paths

**7. Are you satisfied with the position and overall quality of artificial lightning in these spaces?**  
(Choose grade from 1 to 5; 1-not at all, 5-very satisfied)

Answer: 3

**8. Do you feel comfortable and safe in these spaces during nighttime?**

1. Yes
2. No

Answer: No

The questionnaire No: 219

Are you conducting a survey and or interview?

1. Yes
2. No

Answer: Yes

You have been asked to complete this survey as part of scientific research "*Increasing the livability of open public space during nighttime: the importance of lightning in the waterfront areas*". The study is designed to determine the usage dynamics of the waterfront area. Your responses are entirely voluntary, and you may refuse to complete any part or all of this survey. This survey is designed to be anonymous, meaning that there should be no way to connect your responses with you. Toward that end, please do not sign your name to the survey, or include any information in your responses that makes it easy to identify you. By completing and submitting the survey, you affirm that you are at least 18 years old and that you give your consent to use your answers in this research.

*General information:*

Age:

1. 18-25;
2. 25-40;
3. 40-55;
4. 55+

Answer: 18-25

Gender

1. Female
2. Male

Answer: Female

*PART A: Open space usage:*

**1. Do you use open public space in the waterfront area?**

1. Yes
2. No

Answer: Yes

**2. Time period: When do you use these spaces the most?**

1. in the morning
2. in the afternoon
3. in the evening/during nighttime
4. other: in the morning and in the evening

Answer: 2) in the afternoon

*PART B: Nighttime open space usage:*

**3. Frequency: How often do you visit these spaces during nighttime?**

1. very often - every day
2. often - once or twice per week
3. rarely - one or twice per month
4. almost never

Answer: 4) almost never

**4. Duration: How much time do you usually spend in these places during nighttime?**

1. more than 1 hour
2. around 30 minutes
3. 10-15 minutes
4. couple of minutes

Answer: 1) more than 1 hour

**5. Activity: What type of activities do you engage in these spaces during nighttime?**

1. leisure and socialization- hanging out with friends or walking the dog
2. recreation - walking, running, cycling, exercise
3. relaxing by myself
4. just passing through
5. Other / walking the dog

Answer: 1) leisure and socialization- hangingt out with friends or walking the dog

**6. When spending time in open space during nighttime what is the most important spatial feature that influence the position and means of usage?**

1. urban furniture and pedestrian/bicycle paths
2. greenery and water proximity
3. Lightning
4. Other: \_\_\_\_\_

Answer: 2) greenery and water proximity

**7. Are you satisfied with the position and overall quality of artificial lightning in these spaces?**  
(Choose grade from 1 to 5; 1-not at all, 5-very satisfied)

Answer: 3

**8. Do you feel comfortable and safe in these spaces during nighttime?**

1. Yes
2. No

Answer: No

The questionnaire No: 220

Are you conducting a survey and or interview?

1. Yes
2. No

Answer: Yes

You have been asked to complete this survey as part of scientific research "*Increasing the livability of open public space during nighttime: the importance of lightning in the waterfront areas*". The study is designed to determine the usage dynamics of the waterfront area. Your responses are entirely voluntary, and you may refuse to complete any part or all of this survey. This survey is designed to be anonymous, meaning that there should be no way to connect your responses with you. Toward that end, please do not sign your name to the survey, or include any information in your responses that makes it easy to identify you. By completing and submitting the survey, you affirm that you are at least 18 years old and that you give your consent to use your answers in this research.

*General information:*

Age:

1. 18-25;
2. 25-40;
3. 40-55;
4. 55+

Answer: 18-25

Gender

1. Female
2. Male

Answer: Female

*PART A: Open space usage:*

**1. Do you use open public space in the waterfront area?**

1. Yes
2. No

Answer: Yes

**2. Time period: When do you use these spaces the most?**

1. in the morning
2. in the afternoon
3. in the evening/during nighttime
4. other: in the morning and in the evening

Answer: 2) in the afternoon

*PART B: Nighttime open space usage:*

**3. Frequency: How often do you visit these spaces during nighttime?**

1. very often - every day
2. often - once or twice per week
3. rarely - one or twice per month
4. almost never

Answer: 2) often - once or twice per week

**4. Duration: How much time do you usually spend in these places during nighttime?**

1. more than 1 hour
2. around 30 minutes
3. 10-15 minutes
4. couple of minutes

Answer: 1) more than 1 hour

**5. Activity: What type of activities do you engage in these spaces during nighttime?**

1. leisure and socialization- hanging out with friends or walking the dog
2. recreation - walking, running, cycling, exercise
3. relaxing by myself
4. just passing through
5. Other / walking the dog

Answer: 1) leisure and socialization- hangingt out with friends or walking the dog

**6. When spending time in open space during nighttime what is the most important spatial feature that influence the position and means of usage?**

1. urban furniture and pedestrian/bicycle paths
2. greenery and water proximity
3. Lightning
4. Other: \_\_\_\_\_

Answer: 2) greenery and water proximity

**7. Are you satisfied with the position and overall quality of artificial lightning in these spaces?**  
(Choose grade from 1 to 5; 1-not at all, 5-very satisfied)

Answer: 3

**8. Do you feel comfortable and safe in these spaces during nighttime?**

1. Yes
2. No

Answer: No

The questionnaire No: 221

Are you conducting a survey and or interview?

1. Yes
2. No

Answer: Yes

You have been asked to complete this survey as part of scientific research "*Increasing the livability of open public space during nighttime: the importance of lightning in the waterfront areas*". The study is designed to determine the usage dynamics of the waterfront area. Your responses are entirely voluntary, and you may refuse to complete any part or all of this survey. This survey is designed to be anonymous, meaning that there should be no way to connect your responses with you. Toward that end, please do not sign your name to the survey, or include any information in your responses that makes it easy to identify you. By completing and submitting the survey, you affirm that you are at least 18 years old and that you give your consent to use your answers in this research.

*General information:*

Age:

1. 18-25;
2. 25-40;
3. 40-55;
4. 55+

Answer: 18-25

Gender

1. Female
2. Male

Answer: Female

*PART A: Open space usage:*

**1. Do you use open public space in the waterfront area?**

1. Yes
2. No

Answer: Yes

**2. Time period: When do you use these spaces the most?**

1. in the morning
2. in the afternoon
3. in the evening/during nighttime
4. other: in the morning and in the evening

Answer: 3) in the evening/during nighttime

The questionnaire No: 221

*PART B: Nighttime open space usage:*

**3. Frequency: How often do you visit these spaces during nighttime?**

1. very often - every day
2. often - once or twice per week
3. rarely - one or twice per month
4. almost never

Answer: 2) often - once or twice per week

**4. Duration: How much time do you usually spend in these places during nighttime?**

1. more than 1 hour
2. around 30 minutes
3. 10-15 minutes
4. couple of minutes

Answer: 2) around 30 minutes

**5. Activity: What type of activities do you engage in these spaces during nighttime?**

1. leisure and socialization- hanging out with friends or walking the dog
2. recreation - walking, running, cycling, exercise
3. relaxing by myself
4. just passing through
5. Other / walking the dog

Answer: 3) relaxing by myself

**6. When spending time in open space during nighttime what is the most important spatial feature that influence the position and means of usage?**

1. urban furniture and pedestrian/bicycle paths
2. greenery and water proximity
3. Lightning
4. Other: \_\_\_\_\_

Answer: 2) greenery and water proximity

**7. Are you satisfied with the position and overall quality of artificial lightning in these spaces?**  
(Choose grade from 1 to 5; 1-not at all, 5-very satisfied)

Answer: 3

**8. Do you feel comfortable and safe in these spaces during nighttime?**

1. Yes
2. No

Answer: No

The questionnaire No: 222

Are you conducting a survey and or interview?

1. Yes
2. No

Answer: Yes

You have been asked to complete this survey as part of scientific research "*Increasing the livability of open public space during nighttime: the importance of lightning in the waterfront areas*". The study is designed to determine the usage dynamics of the waterfront area. Your responses are entirely voluntary, and you may refuse to complete any part or all of this survey. This survey is designed to be anonymous, meaning that there should be no way to connect your responses with you. Toward that end, please do not sign your name to the survey, or include any information in your responses that makes it easy to identify you. By completing and submitting the survey, you affirm that you are at least 18 years old and that you give your consent to use your answers in this research.

*General information:*

Age:

1. 18-25;
2. 25-40;
3. 40-55;
4. 55+

Answer: 18-25

Gender

1. Female
2. Male

Answer: Female

*PART A: Open space usage:*

**1. Do you use open public space in the waterfront area?**

1. Yes
2. No

Answer: Yes

**2. Time period: When do you use these spaces the most?**

1. in the morning
2. in the afternoon
3. in the evening/during nighttime
4. other: in the morning and in the evening

Answer: 1) in the morning

*PART B: Nighttime open space usage:*

**3. Frequency: How often do you visit these spaces during nighttime?**

1. very often - every day
2. often - once or twice per week
3. rarely - one or twice per month
4. almost never

Answer: 3) rarely - one or twice per month

**4. Duration: How much time do you usually spend in these places during nighttime?**

1. more than 1 hour
2. around 30 minutes
3. 10-15 minutes
4. couple of minutes

Answer: 1) more than 1 hour

**5. Activity: What type of activities do you engage in these spaces during nighttime?**

1. leisure and socialization- hanging out with friends or walking the dog
2. recreation - walking, running, cycling, exercise
3. relaxing by myself
4. just passing through
5. Other / walking the dog

Answer: 4) just passing through

**6. When spending time in open space during nighttime what is the most important spatial feature that influence the position and means of usage?**

1. urban furniture and pedestrian/bicycle paths
2. greenery and water proximity
3. Lightning
4. Other: \_\_\_\_\_

Answer: 3) Lightning

**7. Are you satisfied with the position and overall quality of artificial lightning in these spaces?**  
(Choose grade from 1 to 5; 1-not at all, 5-very satisfied)

Answer: 3

**8. Do you feel comfortable and safe in these spaces during nighttime?**

1. Yes
2. No

Answer: No

The questionnaire No: 223

Are you conducting a survey and or interview?

1. Yes
2. No

Answer: Yes

You have been asked to complete this survey as part of scientific research "*Increasing the livability of open public space during nighttime: the importance of lightning in the waterfront areas*". The study is designed to determine the usage dynamics of the waterfront area. Your responses are entirely voluntary, and you may refuse to complete any part or all of this survey. This survey is designed to be anonymous, meaning that there should be no way to connect your responses with you. Toward that end, please do not sign your name to the survey, or include any information in your responses that makes it easy to identify you. By completing and submitting the survey, you affirm that you are at least 18 years old and that you give your consent to use your answers in this research.

*General information:*

Age:

1. 18-25;
2. 25-40;
3. 40-55;
4. 55+

Answer: 18-25

Gender

1. Female
2. Male

Answer: Female

*PART A: Open space usage:*

**1. Do you use open public space in the waterfront area?**

1. Yes
2. No

Answer: Yes

**2. Time period: When do you use these spaces the most?**

1. in the morning
2. in the afternoon
3. in the evening/during nighttime
4. other: in the morning and in the evening

Answer: 2) in the afternoon

*PART B: Nighttime open space usage:*

**3. Frequency: How often do you visit these spaces during nighttime?**

1. very often - every day
2. often - once or twice per week
3. rarely - one or twice per month
4. almost never

Answer: 3) rarely - one or twice per month

**4. Duration: How much time do you usually spend in these places during nighttime?**

1. more than 1 hour
2. around 30 minutes
3. 10-15 minutes
4. couple of minutes

Answer: 3) 10-15 minutes

**5. Activity: What type of activities do you engage in these spaces during nighttime?**

1. leisure and socialization- hanging out with friends or walking the dog
2. recreation - walking, running, cycling, exercise
3. relaxing by myself
4. just passing through
5. Other / walking the dog

Answer: 1) leisure and socialization- hangingt out with friends or walking the dog

**6. When spending time in open space during nighttime what is the most important spatial feature that influence the position and means of usage?**

1. urban furniture and pedestrian/bicycle paths
2. greenery and water proximity
3. Lightning
4. Other: \_\_\_\_\_

Answer: Other: river restaurants

**7. Are you satisfied with the position and overall quality of artificial lightning in these spaces?**  
(Choose grade from 1 to 5; 1-not at all, 5-very satisfied)

Answer: 1

**8. Do you feel comfortable and safe in these spaces during nighttime?**

1. Yes
2. No

Answer: No

The questionnaire No: 224

Are you conducting a survey and or interview?

1. Yes
2. No

Answer: Yes

You have been asked to complete this survey as part of scientific research "*Increasing the livability of open public space during nighttime: the importance of lightning in the waterfront areas*". The study is designed to determine the usage dynamics of the waterfront area. Your responses are entirely voluntary, and you may refuse to complete any part or all of this survey. This survey is designed to be anonymous, meaning that there should be no way to connect your responses with you. Toward that end, please do not sign your name to the survey, or include any information in your responses that makes it easy to identify you. By completing and submitting the survey, you affirm that you are at least 18 years old and that you give your consent to use your answers in this research.

*General information:*

Age:

1. 18-25;
2. 25-40;
3. 40-55;
4. 55+

Answer: 55+

Gender

1. Female
2. Male

Answer: Male

*PART A: Open space usage:*

**1. Do you use open public space in the waterfront area?**

1. Yes
2. No

Answer: Yes

**2. Time period: When do you use these spaces the most?**

1. in the morning
2. in the afternoon
3. in the evening/during nighttime
4. other: in the morning and in the evening

Answer: 1) in the morning

*PART B: Nighttime open space usage:*

**3. Frequency: How often do you visit these spaces during nighttime?**

1. very often - every day
2. often - once or twice per week
3. rarely - one or twice per month
4. almost never

Answer: 2) often - once or twice per week

**4. Duration: How much time do you usually spend in these places during nighttime?**

1. more than 1 hour
2. around 30 minutes
3. 10-15 minutes
4. couple of minutes

Answer: 1) more than 1 hour

**5. Activity: What type of activities do you engage in these spaces during nighttime?**

1. leisure and socialization- hanging out with friends or walking the dog
2. recreation - walking, running, cycling, exercise
3. relaxing by myself
4. just passing through
5. Other / walking the dog

Answer: 2) recreation - walking, running, cycling, exercise

**6. When spending time in open space during nighttime what is the most important spatial feature that influence the position and means of usage?**

1. urban furniture and pedestrian/bicycle paths
2. greenery and water proximity
3. Lightning
4. Other: \_\_\_\_\_

Answer: 3) Lightning

**7. Are you satisfied with the position and overall quality of artificial lightning in these spaces?**  
(Choose grade from 1 to 5; 1-not at all, 5-very satisfied)

Answer: 3

**8. Do you feel comfortable and safe in these spaces during nighttime?**

1. Yes
2. No

Answer: No

The questionnaire No: 225

Are you conducting a survey and or interview?

1. Yes
2. No

Answer: Yes

You have been asked to complete this survey as part of scientific research "*Increasing the livability of open public space during nighttime: the importance of lightning in the waterfront areas*". The study is designed to determine the usage dynamics of the waterfront area. Your responses are entirely voluntary, and you may refuse to complete any part or all of this survey. This survey is designed to be anonymous, meaning that there should be no way to connect your responses with you. Toward that end, please do not sign your name to the survey, or include any information in your responses that makes it easy to identify you. By completing and submitting the survey, you affirm that you are at least 18 years old and that you give your consent to use your answers in this research.

*General information:*

Age:

1. 18-25;
2. 25-40;
3. 40-55;
4. 55+

Answer: 18-25

Gender

1. Female
2. Male

Answer: Female

*PART A: Open space usage:*

**1. Do you use open public space in the waterfront area?**

1. Yes
2. No

Answer: Yes

**2. Time period: When do you use these spaces the most?**

1. in the morning
2. in the afternoon
3. in the evening/during nighttime
4. other: in the morning and in the evening

Answer: 1) in the morning

*PART B: Nighttime open space usage:*

**3. Frequency: How often do you visit these spaces during nighttime?**

1. very often - every day
2. often - once or twice per week
3. rarely - one or twice per month
4. almost never

Answer: 3) rarely - one or twice per month

**4. Duration: How much time do you usually spend in these places during nighttime?**

1. more than 1 hour
2. around 30 minutes
3. 10-15 minutes
4. couple of minutes

Answer: 2) around 30 minutes

**5. Activity: What type of activities do you engage in these spaces during nighttime?**

1. leisure and socialization- hanging out with friends or walking the dog
2. recreation - walking, running, cycling, exercise
3. relaxing by myself
4. just passing through
5. Other / walking the dog

Answer: 1) leisure and socialization- hangingt out with friends or walking the dog

**6. When spending time in open space during nighttime what is the most important spatial feature that influence the position and means of usage?**

1. urban furniture and pedestrian/bicycle paths
2. greenery and water proximity
3. Lightning
4. Other: \_\_\_\_\_

Answer: 3) Lightning

**7. Are you satisfied with the position and overall quality of artificial lightning in these spaces?**

(Choose grade from 1 to 5; 1-not at all, 5-very satisfied)

Answer: 2

**8. Do you feel comfortable and safe in these spaces during nighttime?**

1. Yes
2. No

Answer: No

The questionnaire No: 226

Are you conducting a survey and or interview?

1. Yes
2. No

Answer: Yes

You have been asked to complete this survey as part of scientific research "*Increasing the livability of open public space during nighttime: the importance of lightning in the waterfront areas*". The study is designed to determine the usage dynamics of the waterfront area. Your responses are entirely voluntary, and you may refuse to complete any part or all of this survey. This survey is designed to be anonymous, meaning that there should be no way to connect your responses with you. Toward that end, please do not sign your name to the survey, or include any information in your responses that makes it easy to identify you. By completing and submitting the survey, you affirm that you are at least 18 years old and that you give your consent to use your answers in this research.

*General information:*

Age:

1. 18-25;
2. 25-40;
3. 40-55;
4. 55+

Answer: 18-25

Gender

1. Female
2. Male

Answer: Male

*PART A: Open space usage:*

**1. Do you use open public space in the waterfront area?**

1. Yes
2. No

Answer: Yes

**2. Time period: When do you use these spaces the most?**

1. in the morning
2. in the afternoon
3. in the evening/during nighttime
4. other: in the morning and in the evening

Answer: 2) in the afternoon

*PART B: Nighttime open space usage:*

**3. Frequency: How often do you visit these spaces during nighttime?**

1. very often - every day
2. often - once or twice per week
3. rarely - one or twice per month
4. almost never

Answer: 3) rarely - one or twice per month

**4. Duration: How much time do you usually spend in these places during nighttime?**

1. more than 1 hour
2. around 30 minutes
3. 10-15 minutes
4. couple of minutes

Answer: 2) around 30 minutes

**5. Activity: What type of activities do you engage in these spaces during nighttime?**

1. leisure and socialization- hanging out with friends or walking the dog
2. recreation - walking, running, cycling, exercise
3. relaxing by myself
4. just passing through
5. Other / walking the dog

Answer: 3) relaxing by myself

**6. When spending time in open space during nighttime what is the most important spatial feature that influence the position and means of usage?**

1. urban furniture and pedestrian/bicycle paths
2. greenery and water proximity
3. Lightning
4. Other: \_\_\_\_\_

Answer: 3) Lightning

**7. Are you satisfied with the position and overall quality of artificial lightning in these spaces?**  
(Choose grade from 1 to 5; 1-not at all, 5-very satisfied)

Answer: 3

**8. Do you feel comfortable and safe in these spaces during nighttime?**

1. Yes
2. No

Answer: Yes

The questionnaire No: 227

Are you conducting a survey and or interview?

1. Yes
2. No

Answer: Yes

You have been asked to complete this survey as part of scientific research "*Increasing the livability of open public space during nighttime: the importance of lightning in the waterfront areas*". The study is designed to determine the usage dynamics of the waterfront area. Your responses are entirely voluntary, and you may refuse to complete any part or all of this survey. This survey is designed to be anonymous, meaning that there should be no way to connect your responses with you. Toward that end, please do not sign your name to the survey, or include any information in your responses that makes it easy to identify you. By completing and submitting the survey, you affirm that you are at least 18 years old and that you give your consent to use your answers in this research.

*General information:*

Age:

1. 18-25;
2. 25-40;
3. 40-55;
4. 55+

Answer: 18-25

Gender

1. Female
2. Male

Answer: Female

*PART A: Open space usage:*

**1. Do you use open public space in the waterfront area?**

1. Yes
2. No

Answer: Yes

**2. Time period: When do you use these spaces the most?**

1. in the morning
2. in the afternoon
3. in the evening/during nighttime
4. other: in the morning and in the evening

Answer: 1) in the morning

*PART B: Nighttime open space usage:*

**3. Frequency: How often do you visit these spaces during nighttime?**

1. very often - every day
2. often - once or twice per week
3. rarely - one or twice per month
4. almost never

Answer: 4) almost never

**4. Duration: How much time do you usually spend in these places during nighttime?**

1. more than 1 hour
2. around 30 minutes
3. 10-15 minutes
4. couple of minutes

Answer: 3) 10-15 minutes

**5. Activity: What type of activities do you engage in these spaces during nighttime?**

1. leisure and socialization- hanging out with friends or walking the dog
2. recreation - walking, running, cycling, exercise
3. relaxing by myself
4. just passing through
5. Other / walking the dog

Answer: 1) leisure and socialization- hangingt out with friends or walking the dog

**6. When spending time in open space during nighttime what is the most important spatial feature that influence the position and means of usage?**

1. urban furniture and pedestrian/bicycle paths
2. greenery and water proximity
3. Lightning
4. Other: \_\_\_\_\_

Answer: Other: monuments

**7. Are you satisfied with the position and overall quality of artificial lightning in these spaces?**  
(Choose grade from 1 to 5; 1-not at all, 5-very satisfied)

Answer: 3

**8. Do you feel comfortable and safe in these spaces during nighttime?**

1. Yes
2. No

Answer: No

The questionnaire No: 228

Are you conducting a survey and or interview?

1. Yes
2. No

Answer: Yes

You have been asked to complete this survey as part of scientific research "*Increasing the livability of open public space during nighttime: the importance of lightning in the waterfront areas*". The study is designed to determine the usage dynamics of the waterfront area. Your responses are entirely voluntary, and you may refuse to complete any part or all of this survey. This survey is designed to be anonymous, meaning that there should be no way to connect your responses with you. Toward that end, please do not sign your name to the survey, or include any information in your responses that makes it easy to identify you. By completing and submitting the survey, you affirm that you are at least 18 years old and that you give your consent to use your answers in this research.

*General information:*

Age:

1. 18-25;
2. 25-40;
3. 40-55;
4. 55+

Answer: 25-40

Gender

1. Female
2. Male

Answer: Female

*PART A: Open space usage:*

**1. Do you use open public space in the waterfront area?**

1. Yes
2. No

Answer: Yes

**2. Time period: When do you use these spaces the most?**

1. in the morning
2. in the afternoon
3. in the evening/during nighttime
4. other: in the morning and in the evening

Answer: 2) in the afternoon

*PART B: Nighttime open space usage:*

**3. Frequency: How often do you visit these spaces during nighttime?**

1. very often - every day
2. often - once or twice per week
3. rarely - one or twice per month
4. almost never

Answer: 3) rarely - one or twice per month

**4. Duration: How much time do you usually spend in these places during nighttime?**

1. more than 1 hour
2. around 30 minutes
3. 10-15 minutes
4. couple of minutes

Answer: 1) more than 1 hour

**5. Activity: What type of activities do you engage in these spaces during nighttime?**

1. leisure and socialization- hanging out with friends or walking the dog
2. recreation - walking, running, cycling, exercise
3. relaxing by myself
4. just passing through
5. Other / walking the dog

Answer: 4) just passing through

**6. When spending time in open space during nighttime what is the most important spatial feature that influence the position and means of usage?**

1. urban furniture and pedestrian/bicycle paths
2. greenery and water proximity
3. Lightning
4. Other: \_\_\_\_\_

Answer: Other: river restaurants

**7. Are you satisfied with the position and overall quality of artificial lightning in these spaces?**  
(Choose grade from 1 to 5; 1-not at all, 5-very satisfied)

Answer: 3

**8. Do you feel comfortable and safe in these spaces during nighttime?**

1. Yes
2. No

Answer: No

The questionnaire No: 229

Are you conducting a survey and or interview?

1. Yes
2. No

Answer: Yes

You have been asked to complete this survey as part of scientific research "*Increasing the livability of open public space during nighttime: the importance of lightning in the waterfront areas*". The study is designed to determine the usage dynamics of the waterfront area. Your responses are entirely voluntary, and you may refuse to complete any part or all of this survey. This survey is designed to be anonymous, meaning that there should be no way to connect your responses with you. Toward that end, please do not sign your name to the survey, or include any information in your responses that makes it easy to identify you. By completing and submitting the survey, you affirm that you are at least 18 years old and that you give your consent to use your answers in this research.

*General information:*

Age:

1. 18-25;
2. 25-40;
3. 40-55;
4. 55+

Answer: 25-40

Gender

1. Female
2. Male

Answer: Female

*PART A: Open space usage:*

**1. Do you use open public space in the waterfront area?**

1. Yes
2. No

Answer: Yes

**2. Time period: When do you use these spaces the most?**

1. in the morning
2. in the afternoon
3. in the evening/during nighttime
4. other: in the morning and in the evening

Answer: 4) other: in the morning and in the evening

*PART B: Nighttime open space usage:*

**3. Frequency: How often do you visit these spaces during nighttime?**

1. very often - every day
2. often - once or twice per week
3. rarely - one or twice per month
4. almost never

Answer: 3) rarely - one or twice per month

**4. Duration: How much time do you usually spend in these places during nighttime?**

1. more than 1 hour
2. around 30 minutes
3. 10-15 minutes
4. couple of minutes

Answer: 1) more than 1 hour

**5. Activity: What type of activities do you engage in these spaces during nighttime?**

1. leisure and socialization- hanging out with friends or walking the dog
2. recreation - walking, running, cycling, exercise
3. relaxing by myself
4. just passing through
5. Other / walking the dog

Answer: 4) just passing through

**6. When spending time in open space during nighttime what is the most important spatial feature that influence the position and means of usage?**

1. urban furniture and pedestrian/bicycle paths
2. greenery and water proximity
3. Lightning
4. Other: \_\_\_\_\_

Answer: Other: monuments

**7. Are you satisfied with the position and overall quality of artificial lightning in these spaces?**  
(Choose grade from 1 to 5; 1-not at all, 5-very satisfied)

Answer: 2

**8. Do you feel comfortable and safe in these spaces during nighttime?**

1. Yes
2. No

Answer: No

The questionnaire No: 230

Are you conducting a survey and or interview?

1. Yes
2. No

Answer: Yes

You have been asked to complete this survey as part of scientific research "*Increasing the livability of open public space during nighttime: the importance of lightning in the waterfront areas*". The study is designed to determine the usage dynamics of the waterfront area. Your responses are entirely voluntary, and you may refuse to complete any part or all of this survey. This survey is designed to be anonymous, meaning that there should be no way to connect your responses with you. Toward that end, please do not sign your name to the survey, or include any information in your responses that makes it easy to identify you. By completing and submitting the survey, you affirm that you are at least 18 years old and that you give your consent to use your answers in this research.

*General information:*

Age:

1. 18-25;
2. 25-40;
3. 40-55;
4. 55+

Answer: 40-55

Gender

1. Female
2. Male

Answer: Female

*PART A: Open space usage:*

**1. Do you use open public space in the waterfront area?**

1. Yes
2. No

Answer: Yes

**2. Time period: When do you use these spaces the most?**

1. in the morning
2. in the afternoon
3. in the evening/during nighttime
4. other: in the morning and in the evening

Answer: 3) in the evening/during nighttime

*PART B: Nighttime open space usage:*

**3. Frequency: How often do you visit these spaces during nighttime?**

1. very often - every day
2. often - once or twice per week
3. rarely - one or twice per month
4. almost never

Answer: 3) rarely - one or twice per month

**4. Duration: How much time do you usually spend in these places during nighttime?**

1. more than 1 hour
2. around 30 minutes
3. 10-15 minutes
4. couple of minutes

Answer: 2) around 30 minutes

**5. Activity: What type of activities do you engage in these spaces during nighttime?**

1. leisure and socialization- hanging out with friends or walking the dog
2. recreation - walking, running, cycling, exercise
3. relaxing by myself
4. just passing through
5. Other / walking the dog

Answer: 1) leisure and socialization- hangingt out with friends or walking the dog

**6. When spending time in open space during nighttime what is the most important spatial feature that influence the position and means of usage?**

1. urban furniture and pedestrian/bicycle paths
2. greenery and water proximity
3. Lightning
4. Other: \_\_\_\_\_

Answer: 3) Lightning

**7. Are you satisfied with the position and overall quality of artificial lightning in these spaces?**  
(Choose grade from 1 to 5; 1-not at all, 5-very satisfied)

Answer: 3

**8. Do you feel comfortable and safe in these spaces during nighttime?**

1. Yes
2. No

Answer: No

The questionnaire No: 231

Are you conducting a survey and or interview?

1. Yes
2. No

Answer: Yes

You have been asked to complete this survey as part of scientific research "*Increasing the livability of open public space during nighttime: the importance of lightning in the waterfront areas*". The study is designed to determine the usage dynamics of the waterfront area. Your responses are entirely voluntary, and you may refuse to complete any part or all of this survey. This survey is designed to be anonymous, meaning that there should be no way to connect your responses with you. Toward that end, please do not sign your name to the survey, or include any information in your responses that makes it easy to identify you. By completing and submitting the survey, you affirm that you are at least 18 years old and that you give your consent to use your answers in this research.

*General information:*

Age:

1. 18-25;
2. 25-40;
3. 40-55;
4. 55+

Answer: 40-55

Gender

1. Female
2. Male

Answer: Male

*PART A: Open space usage:*

**1. Do you use open public space in the waterfront area?**

1. Yes
2. No

Answer: Yes

**2. Time period: When do you use these spaces the most?**

1. in the morning
2. in the afternoon
3. in the evening/during nighttime
4. other: in the morning and in the evening

Answer: 2) in the afternoon

The questionnaire No: 231

*PART B: Nighttime open space usage:*

**3. Frequency: How often do you visit these spaces during nighttime?**

1. very often - every day
2. often - once or twice per week
3. rarely - one or twice per month
4. almost never

Answer: 3) rarely - one or twice per month

**4. Duration: How much time do you usually spend in these places during nighttime?**

1. more than 1 hour
2. around 30 minutes
3. 10-15 minutes
4. couple of minutes

Answer: 1) more than 1 hour

**5. Activity: What type of activities do you engage in these spaces during nighttime?**

1. leisure and socialization- hanging out with friends or walking the dog
2. recreation - walking, running, cycling, exercise
3. relaxing by myself
4. just passing through
5. Other / walking the dog

Answer: 3) relaxing by myself

**6. When spending time in open space during nighttime what is the most important spatial feature that influence the position and means of usage?**

1. urban furniture and pedestrian/bicycle paths
2. greenery and water proximity
3. Lightning
4. Other: \_\_\_\_\_

Answer: 3) Lightning

**7. Are you satisfied with the position and overall quality of artificial lightning in these spaces?**  
(Choose grade from 1 to 5; 1-not at all, 5-very satisfied)

Answer: 3

**8. Do you feel comfortable and safe in these spaces during nighttime?**

1. Yes
2. No

Answer: No
